# Supplementary material for: Molecular changes induced by the curcumin analogue D6 in human melanoma cells
Source: Mol Cancer. 2013 May 4;12:37. doi: 10.1186/1476-4598-12-37 (PMC3651720; doi:10.1186/1476-4598-12-37)
Supplement: Additional file 2 — Fibroblasts: gene expression profile results. Excel file composed of three sheets: 2-A, 2-B, 2-C. 2-A: List of 1883 probes differentially expressed in BJ normal fibroblasts after 16 hours of exposure to 10 μM D6. The list resulted from the statistical analysis performed by using the BRB-Array Tools as described in the Methods section. Data were filtered by fold change (FC) considering as differentially expressed probes only those showing 0.5 > FC > 2. In column C (Gene symbol) hyperlink to gene annotations from the NCBI Entrez gene database are supplied. 2-B: List of bio-functional categories, identified by Ingenuity Pathway Analysis (IPA) software by analysing the 1883 transcripts modulated in 10 μM D6 treated BJ normal fibroblasts (column A). Function annotations (column B), number of genes of the input list involved in each functional category (column E) and their symbol (column F) are shown in the table. Right-tailed Fisher’s exact test has been performed to calculate a p-value (column C) determining the probability that each biological function assigned the selected transcripts was due to chance. p-values were adjusted for multiple comparisons using the Benjamini-Hochberg correction (column D). 2-C: List of canonical pathways, identified by IPA software by analysing the 1883 transcripts modulated in 10 μM D6 treated BJ normal fibroblasts (column A). p-values (calculated using Fisher’s exact test) reflect the probability that the association between the genes in the dataset and the canonical pathway is explained by chance alone (column B). The ratios in column C represent the number of molecules in a given pathway that meet cut-off criteria, divided by total number of molecules that make up that pathway. Genes of the input list involved in each pathway are shown in column D. [file 1476-4598-12-37-S2.xls]

## Sheet: B-1
List of 1883 probes differentially expressed in BJ Fibroblasts (0.5>FC>2)
	Unique id	Gene symbol	Parametric p-value	FDR	Permutation p-value	Geom mean of intensities in class 1	Geom mean of intensities in class 2	Fold-change
1	160092	HSPA6	< 1e-07	< 1e-07	0.1	47917.6	99.7493	480.38
2	1710553	HSPA6	< 1e-07	< 1e-07	0.1	17499	126.06	138.814
3	6480091	DNAJA4	< 1e-07	< 1e-07	0.1	14362.3	237.81	60.3939
4	4830424	MYLIP	< 1e-07	< 1e-07	0.1	4446.12	145.365	30.5859
5	1820594	HBEGF	< 1e-07	< 1e-07	0.1	6424.11	281.214	22.8442
6	5570520	RRAD	< 1e-07	< 1e-07	0.1	2082.45	97.6459	21.3266
7	60079	DNAJB1	< 1e-07	< 1e-07	0.1	29564.8	991.414	29.8208
8	7200639	RRAD	< 1e-07	< 1e-07	0.1	1858.52	107.502	17.2882
9	3440138	CLK1	< 1e-07	< 1e-07	0.1	6934.69	346.852	19.9932
10	3890349	HIST1H4C	< 1e-07	< 1e-07	0.1	356.924	8192.81	0.0435656
11	7320139	SOX8	< 1e-07	< 1e-07	0.1	2019.84	125.442	16.1018
12	3370129	RASL11B	< 1e-07	< 1e-07	0.1	2164.96	106.011	20.422
13	3400019	RGS2	< 1e-07	< 1e-07	0.1	10534.9	772.403	13.6391
14	150327	HSPH1	< 1e-07	< 1e-07	0.1	28863.9	2259.22	12.7761
15	2710064	LOC387763	< 1e-07	< 1e-07	0.1	2874.03	188.401	15.2549
16	3850433	HSPA1B	< 1e-07	< 1e-07	0.1	47111.5	2491.12	18.9117
17	6370523	KBTBD8	< 1e-07	< 1e-07	0.1	1490.69	128.667	11.5857
18	6280471	HSPA1L	< 1e-07	< 1e-07	0.1	2268.32	171.846	13.1997
19	4780128	ATF3	< 1e-07	< 1e-07	0.1	4390.63	337.406	13.0129
20	5570102	DKK1	< 1e-07	< 1e-07	0.1	2631.79	32990	0.0797753
21	870379	ZFAND2A	< 1e-07	< 1e-07	0.1	17073.8	973.197	17.544
22	6550170	KLHL9	< 1e-07	< 1e-07	0.1	111.87	1427.75	0.0783538
23	2710370	SSR2	< 1e-07	< 1e-07	0.1	2164.3	168.52	12.843
24	840114	IL11	< 1e-07	< 1e-07	0.1	7144.13	627.25	11.3896
25	990176	RN7SK	< 1e-07	< 1e-07	0.1	1939.01	104.778	18.5059
26	520382	CLK1	< 1e-07	< 1e-07	0.1	2770.25	175.186	15.8132
27	1440408	GEM	< 1e-07	< 1e-07	0.1	1528.68	145.394	10.514
28	380528	CHORDC1	< 1e-07	< 1e-07	0.1	3107.07	265.311	11.7111
29	5570114	GADD45G	< 1e-07	< 1e-07	0.1	1141.83	101.343	11.267
30	2060440	MAFB	< 1e-07	< 1e-07	0.1	1941.42	124.379	15.6089
31	6020195	UBC	< 1e-07	< 1e-07	0.1	1065.31	109.603	9.71969
32	6770673	SOCS2	< 1e-07	< 1e-07	0.1	678.077	5680.27	0.119374
33	6660601	HMOX1	< 1e-07	< 1e-07	0.1	11249.3	895.875	12.5568
34	2140242	TNFAIP6	< 1e-07	< 1e-07	0.1	1319.6	144.165	9.15339
35	870376	C9orf152	< 1e-07	< 1e-07	0.1	1052.06	103.656	10.1496
36	6770131	OLFM4	< 1e-07	< 1e-07	0.1	112.803	1005.14	0.112227
37	60470	STX11	< 1e-07	< 1e-07	0.1	1540.74	172.331	8.94059
38	830619	DDIT3	< 1e-07	< 1e-07	0.1	3974.03	435.623	9.12262
39	4280301	CCL26	< 1e-07	< 1e-07	0.1	937.071	112.707	8.31423
40	3450201	FAM65B	< 1e-07	< 1e-07	0.1	139.815	1309.09	0.106803
41	3450092	PELI1	< 1e-07	< 1e-07	0.1	1166.03	160.104	7.28293
42	1410113	ARL4A	< 1e-07	< 1e-07	0.1	1367.35	163.787	8.3483
43	2750367	PMAIP1	< 1e-07	< 1e-07	0.1	3202.97	414.58	7.72583
44	2710735	RASD1	< 1e-07	< 1e-07	0.1	4166.53	334.326	12.4625
45	5390161	DUSP5	< 1e-07	< 1e-07	0.1	10707.6	1330.06	8.05047
46	2340026	MRPL18	< 1e-07	< 1e-07	0.1	16101.8	1824.7	8.82436
47	3890521	DEDD2	< 1e-07	< 1e-07	0.1	4873.22	544.25	8.954
48	2970128	ULBP1	< 1e-07	< 1e-07	0.1	1267.78	176.285	7.19163
49	4920110	GADD45B	< 1e-07	< 1e-07	0.1	4438	297.359	14.9247
50	6620437	HOXA5	< 1e-07	< 1e-07	0.1	1345.21	195.552	6.87905
51	6860162	LOC441019	< 1e-07	< 1e-07	0.1	300.449	2092.38	0.143592
52	650241	IER5	< 1e-07	< 1e-07	0.1	6018.68	781.771	7.69878
53	3420139	NIF3L1	< 1e-07	< 1e-07	0.1	192.739	1479.71	0.130254
54	7330241	BDNF	< 1e-07	< 1e-07	0.1	301.644	2309.37	0.130617
55	7100639	ERRFI1	< 1e-07	< 1e-07	0.1	8999.42	1353.73	6.64789
56	610408	HSPA4L	< 1e-07	< 1e-07	0.1	934.441	118.732	7.87019
57	430674	ARC	< 1e-07	< 1e-07	0.1	758.982	103.211	7.3537
58	6370379	SOCS5	< 1e-07	< 1e-07	0.1	111.166	776.957	0.143079
59	5570731	C8orf4	< 1e-07	< 1e-07	0.1	387.75	2836.65	0.136693
60	4640086	FOXQ1	< 1e-07	< 1e-07	0.1	1082.36	168.372	6.42839
61	6380717	HSPA1A	< 1e-07	< 1e-07	0.1	41451.2	3346.52	12.3864
62	3290008	ERN1	< 1e-07	< 1e-07	0.1	1135.49	170.68	6.65277
63	6370369	CD14	< 1e-07	< 1e-07	0.1	1168.56	153.065	7.63436
64	4260201	ACTC1	< 1e-07	< 1e-07	0.1	193.205	1888.15	0.102325
65	5420070	FRMD6	< 1e-07	< 1e-07	0.1	446.226	3451.22	0.129295
66	670255	GADD45A	< 1e-07	< 1e-07	0.1	8634.28	1437.88	6.00485
67	5340129	AKR1C2	< 1e-07	< 1e-07	0.1	892.917	138.408	6.45136
68	580431	PRRX1	< 1e-07	< 1e-07	0.1	756.985	4744.5	0.15955
69	5310360	TLE4	< 1e-07	< 1e-07	0.1	494.805	3162.05	0.156482
70	940021	PEX11B	< 1e-07	< 1e-07	0.1	223.945	1480.9	0.151223
71	3890523	IL7R	< 1e-07	< 1e-07	0.1	519.09	3431.14	0.151288
72	2940110	UHRF1	< 1e-07	< 1e-07	0.1	312.554	2851	0.10963
73	7320039	VEGFC	< 1e-07	< 1e-07	0.1	612.501	3741.81	0.163691
74	4880750	SOCS5	< 1e-07	< 1e-07	0.1	171.93	1235.08	0.139205
75	1580601	USPL1	< 1e-07	< 1e-07	0.1	1880.7	265.629	7.0802
76	4010086	OKL38	< 1e-07	< 1e-07	0.1	1938.16	272.515	7.1121
77	3840753	HEY1	< 1e-07	< 1e-07	0.1	1034.22	180.463	5.73091
78	1340600	PPP1R15A	< 1e-07	< 1e-07	0.1	29133.5	4557.22	6.39282
79	1010487	BTG2	< 1e-07	< 1e-07	0.1	961.499	157.562	6.10233
80	450615	MT2A	< 1e-07	< 1e-07	0.1	8062.36	49233.5	0.163758
81	4890674	SH3BP4	< 1e-07	< 1e-07	0.1	648.171	4185.12	0.154875
82	5050162	CD83	< 1e-07	< 1e-07	0.1	940.674	156.533	6.00944
83	6860347	FAM46C	< 1e-07	< 1e-07	0.1	1648.21	210.361	7.83514
84	6650053	MCM3	< 1e-07	< 1e-07	0.1	610.843	4428.45	0.137936
85	1170246	GEM	< 1e-07	< 1e-07	0.1	1415.07	152.514	9.27827
86	4880609	DKK1	< 1e-07	< 1e-07	0.1	158.784	1385.9	0.114571
87	1110632	NKX3-1	< 1e-07	< 1e-07	0.1	1967.18	244.892	8.03285
88	6520561	SHRM	< 1e-07	< 1e-07	0.1	570.701	4173.85	0.136733
89	160242	C13orf15	< 1e-07	< 1e-07	0.1	2216.01	253.863	8.72916
90	2940040	BCCIP	< 1e-07	< 1e-07	0.1	1558.39	266.868	5.83956
91	110195	LOC646197	< 1e-07	< 1e-07	0.1	3466.89	371.192	9.33988
92	4230475	SOX9	< 1e-07	< 1e-07	0.1	939.061	156.422	6.00339
93	5900240	MRPL18	< 1e-07	< 1e-07	0.1	14227.1	2343.91	6.06983
94	7510309	FRMD6	< 1e-07	< 1e-07	0.1	1397.54	9723.76	0.143725
95	780711	XIRP1	< 1e-07	< 1e-07	0.1	650.565	99.2762	6.55308
96	1690121	CLK1	< 1e-07	< 1e-07	0.1	931.403	123.607	7.53517
97	4760553	ISL1	< 1e-07	< 1e-07	0.1	1581.5	266.057	5.94424
98	4850059	LOC643300	< 1e-07	< 1e-07	0.1	1439.78	237.29	6.06759
99	2690270	SNIP1	< 1e-07	< 1e-07	0.1	1961.66	258.199	7.59747
100	3460424	CHKA	< 1e-07	< 1e-07	0.1	1656.91	281.77	5.88035
101	1660437		< 1e-07	< 1e-07	0.1	855.413	135.759	6.30094
102	2060482	KIAA0907	< 1e-07	< 1e-07	0.1	2267.46	368.046	6.1608
103	670086	MXD1	< 1e-07	< 1e-07	0.1	1285.88	241.711	5.31993
104	3890735	HOXD1	< 1e-07	< 1e-07	0.1	647.041	94.9543	6.81424
105	6840075	NP	< 1e-07	< 1e-07	0.1	3838.14	508.206	7.55233
106	2100750	FKBP4	< 1e-07	< 1e-07	0.1	2681.23	497.465	5.38979
107	2070520	CDCA7	< 1e-07	< 1e-07	0.1	132.403	855.899	0.154694
108	3830170	CBX4	< 1e-07	< 1e-07	0.1	1585.99	288.328	5.50066
109	5490431	SAT1	< 1e-07	< 1e-07	0.1	6511.18	1070.9	6.08009
110	6960687	DUSP2	< 1e-07	< 1e-07	0.1	902.5	166.656	5.41535
111	6250435	ARHGEF3	< 1e-07	< 1e-07	0.1	1258.8	245.007	5.13779
112	5050402	HIST1H2BK	< 1e-07	< 1e-07	0.1	3984.42	730.084	5.45749
113	2480075	ATF7IP2	< 1e-07	< 1e-07	0.1	886.779	136.299	6.50611
114	2340082	IFRD1	< 1e-07	< 1e-07	0.1	1861.33	350.417	5.31176
115	50475	SLU7	< 1e-07	< 1e-07	0.1	2281.92	433.672	5.26187
116	6200402	MT1A	< 1e-07	< 1e-07	0.1	7364.48	39004.1	0.188813
117	1340075	BAG3	< 1e-07	< 1e-07	0.1	15087.3	2944.34	5.12418
118	1580546	LOC728946	< 1e-07	< 1e-07	0.1	229.685	1186.85	0.193524
119	2900435	SAP18	< 1e-07	< 1e-07	0.1	1639.96	331.021	4.95425
120	2760164	DNAJB9	< 1e-07	< 1e-07	0.1	4892.07	956.485	5.11463
121	870600	GCNT1	< 1e-07	< 1e-07	0.1	123.876	643.474	0.192511
122	610201	HES6	< 1e-07	< 1e-07	0.1	988.72	183.979	5.37409
123	7200707	PRMT6	< 1e-07	< 1e-07	0.1	187.362	988.472	0.189547
124	4920537	POLA2	< 1e-07	< 1e-07	0.1	167.195	1117.62	0.149599
125	4810520	TRIB1	< 1e-07	< 1e-07	0.1	5684.36	1017.32	5.58756
126	6550358	UBA52	< 1e-07	< 1e-07	0.1	1642.16	297.428	5.52122
127	7050768	OXTR	< 1e-07	< 1e-07	0.1	2185.02	11240.3	0.194392
128	150180	MMP10	< 1e-07	< 1e-07	0.1	599.159	112.34	5.33343
129	2000148	IFIT1	< 1e-07	< 1e-07	0.1	232.167	1197.95	0.193804
130	6330647	RPS7	< 1e-07	< 1e-07	0.1	5716.27	1110.43	5.14782
131	1980632	DNAJA1	< 1e-07	< 1e-07	0.1	30592	5734.16	5.33505
132	1240386	KLHL21	< 1e-07	< 1e-07	0.1	1137.05	237.285	4.79191
133	4880561	AHSA1	< 1e-07	< 1e-07	0.1	7247.09	1245.31	5.81949
134	3930750	IRAK2	< 1e-07	< 1e-07	0.1	874.674	174.978	4.99876
135	6350066	ARL9	< 1e-07	< 1e-07	0.1	578.02	109.928	5.25817
136	670386	ID1	< 1e-07	< 1e-07	0.1	1208.61	6387.91	0.189202
137	4220241	LOC284023	< 1e-07	< 1e-07	0.1	2022.97	352.577	5.73768
138	4280577	BMP2	< 1e-07	< 1e-07	0.1	644.138	108.532	5.93501
139	2750424	TCP1	< 1e-07	< 1e-07	0.1	3602	552.96	6.51404
140	6650630	SESN2	< 1e-07	< 1e-07	0.1	963.337	208.812	4.61341
141	5260754	TSC22D1	< 1e-07	< 1e-07	0.1	1116.05	234.975	4.74966
142	3940044	2012-03-04	< 1e-07	< 1e-07	0.1	568.232	2752.21	0.206463
143	1010333	MSX1	< 1e-07	< 1e-07	0.1	10129	2039.04	4.96753
144	5220041	HSZFP36	< 1e-07	< 1e-07	0.1	1080.99	204.708	5.28063
145	7380730	TSPYL2	< 1e-07	< 1e-07	0.1	778.206	160.512	4.84826
146	6650743	TSPYL2	< 1e-07	< 1e-07	0.1	1566.12	300.248	5.21609
147	5050523	KRTAP1-5	< 1e-07	< 1e-07	0.1	417.526	2179.08	0.191607
148	2140273	PRIM1	< 1e-07	< 1e-07	0.1	129.795	634.381	0.2046
149	2320170	CDC45L	< 1e-07	< 1e-07	0.1	151.268	1346.75	0.112321
150	6020735	GINS2	< 1e-07	< 1e-07	0.1	172.668	1458.87	0.118358
151	1440376	HNT	< 1e-07	< 1e-07	0.1	203.796	1163.47	0.175162
152	1340743	IL8	< 1e-07	< 1e-07	0.1	2076.39	385.519	5.38596
153	5910338	TMEM203	< 1e-07	< 1e-07	0.1	401.367	1823.08	0.220159
154	5420441	TNFSF9	< 1e-07	< 1e-07	0.1	571.93	121.587	4.70388
155	6620017	MKX	< 1e-07	< 1e-07	0.1	595.404	4472.64	0.133122
156	60630	GLA	< 1e-07	< 1e-07	0.1	3216.99	649.636	4.952
157	6180259	HSPB8	< 1e-07	< 1e-07	0.1	1615.2	245.574	6.57722
158	4920593	CDKN2C	< 1e-07	< 1e-07	0.1	1703.6	388.596	4.384
159	840709	EIF2AK3	< 1e-07	< 1e-07	0.1	664.039	139.467	4.76125
160	7650523	SHISA2	< 1e-07	< 1e-07	0.1	533.706	109.076	4.89299
161	3780674	ZNF503	< 1e-07	< 1e-07	0.1	2103.01	443.228	4.74475
162	6660600	COQ9	< 1e-07	< 1e-07	0.1	283.296	1179.18	0.240248
163	6840215	ECT2	< 1e-07	< 1e-07	0.1	213.147	1136.9	0.187481
164	1090414	TMEM203	< 1e-07	< 1e-07	0.1	380.904	1883.53	0.202229
165	6200132	FZD9	< 1e-07	< 1e-07	0.1	927.518	209.483	4.42765
166	3370671	MED20	< 1e-07	< 1e-07	0.1	325.847	1955.64	0.16662
167	4150204	PRRX2	< 1e-07	< 1e-07	0.1	986.484	4179.2	0.236046
168	6770044	TEX10	< 1e-07	< 1e-07	0.1	2334.71	563.53	4.14302
169	1710746	PRKRIP1	< 1e-07	< 1e-07	0.1	871.261	212.296	4.104
170	5080543	TFPI2	< 1e-07	< 1e-07	0.1	554.192	2618.1	0.211677
171	6020170	MCM4	< 1e-07	< 1e-07	0.1	275.83	1519.93	0.181475
172	60138	CTH	< 1e-07	< 1e-07	0.1	1603	295.258	5.42915
173	2760537	MTE	< 1e-07	< 1e-07	0.1	485.998	2704.06	0.179729
174	3360008	ZNF275	< 1e-07	< 1e-07	0.1	3412	677.076	5.03932
175	780762	CSNK1D	< 1e-07	< 1e-07	0.1	494.374	2263.96	0.218367
176	5490408	CEBPD	< 1e-07	< 1e-07	0.1	1236.85	5821.06	0.212479
177	2350685	HEY2	< 1e-07	< 1e-07	0.1	381.608	93.2972	4.09024
178	2340220	CD55	< 1e-07	< 1e-07	0.1	1795.26	405.847	4.4235
179	3310022	IRX5	< 1e-07	< 1e-07	0.1	1388.93	263.986	5.26139
180	1850433	SPTY2D1	< 1e-07	< 1e-07	0.1	1172.11	212.909	5.50521
181	6550603	HMGCR	< 1e-07	< 1e-07	0.1	2331.74	561.972	4.14921
182	4890451	GRAMD3	< 1e-07	< 1e-07	0.1	1258.45	5146.06	0.244546
183	5290259	KLHL22	< 1e-07	< 1e-07	0.1	203.388	964.247	0.210929
184	7570181	MCM10	< 1e-07	< 1e-07	0.1	156.951	949.189	0.165353
185	4830100	HSP90AB1	< 1e-07	< 1e-07	0.1	30298.3	7038.95	4.30437
186	4830674	BEX2	< 1e-07	< 1e-07	0.1	558.686	116.885	4.77978
187	6860678	HNRPDL	< 1e-07	< 1e-07	0.1	3044.24	688.85	4.41931
188	7150059	STAMBPL1	< 1e-07	< 1e-07	0.1	342.64	1982.5	0.172832
189	1940438	PGF	< 1e-07	< 1e-07	0.1	450.606	115.231	3.91045
190	1710142	RGS4	< 1e-07	< 1e-07	0.1	2004.85	505.22	3.96826
191	5290161	C17orf91	< 1e-07	< 1e-07	0.1	4337.78	1105.37	3.92429
192	620102	MALL	< 1e-07	< 1e-07	0.1	180.366	811.422	0.222284
193	620711	STIP1	< 1e-07	< 1e-07	0.1	10251.1	1975.4	5.18936
194	1690692	SOCS2	< 1e-07	< 1e-07	0.1	224.698	1304.93	0.172191
195	2450131	ZMIZ1	< 1e-07	< 1e-07	0.1	624.672	2723.16	0.229392
196	6770408	MCM2	< 1e-07	< 1e-07	0.1	147.468	736.832	0.200137
197	5570538	SFRS17A	< 1e-07	< 1e-07	0.1	4817.82	1173.79	4.10451
198	3390068	E4F1	< 1e-07	< 1e-07	0.1	211.255	805.528	0.262256
199	6980142		< 1e-07	< 1e-07	0.1	856.228	205.646	4.1636
200	990075	BMP4	< 1e-07	< 1e-07	0.1	708.126	182.124	3.88816
201	5270112	HMGCS1	< 1e-07	< 1e-07	0.1	2423.29	488.847	4.95715
202	4880500	SYNCRIP	< 1e-07	< 1e-07	0.1	502.668	2528.2	0.198824
203	3800168	SLC2A3	< 1e-07	< 1e-07	0.1	19554.5	4633.93	4.21986
204	2470333	TBPL1	< 1e-07	< 1e-07	0.1	4645.5	1246.17	3.72781
205	4570008	ENDOGL1	< 1e-07	< 1e-07	0.1	578.352	2852.67	0.20274
206	4260477	TSPYL2	< 1e-07	< 1e-07	0.1	864.113	165.733	5.21389
207	6940458	ZNF175	< 1e-07	< 1e-07	0.1	858.976	205.59	4.1781
208	7570324	ID3	< 1e-07	< 1e-07	0.1	4391.6	17478.7	0.251254
209	4880673	GADD45A	< 1e-07	< 1e-07	0.1	10423.1	2648.67	3.93522
210	6060484	MARCKS	< 1e-07	< 1e-07	0.1	3915.93	17350.7	0.225693
211	1780075	BAPX1	< 1e-07	< 1e-07	0.1	367.767	99.1097	3.7107
212	3440224	YRDC	< 1e-07	< 1e-07	0.1	2879.58	749.32	3.84292
213	5720180	FZD2	< 1e-07	< 1e-07	0.1	771.707	3804.01	0.202867
214	510341	VEZF1	< 1e-07	< 1e-07	0.1	515.155	1913.31	0.269248
215	2070288	MT1E	< 1e-07	< 1e-07	0.1	2308.19	8543.67	0.270163
216	3940133	FAM46A	< 1e-07	< 1e-07	0.1	10149	2422.2	4.19
217	6560672	HNRPR	< 1e-07	< 1e-07	0.1	473.44	1784.48	0.265311
218	4060494	NFX1	< 1e-07	< 1e-07	0.1	215.792	839.724	0.256979
219	2600747	IFIT2	< 1e-07	< 1e-07	0.1	206.262	794.75	0.259531
220	3850692	KLF2	< 1e-07	< 1e-07	0.1	1421.3	5840.03	0.243372
221	4850370	WNT5B	< 1e-07	< 1e-07	0.1	326.302	1676.92	0.194585
222	2970026	ZNF622	< 1e-07	< 1e-07	0.1	8190.57	2220.32	3.68892
223	6020255	EGR2	< 1e-07	< 1e-07	0.1	759.289	149.651	5.07372
224	1170554	NAT10	< 1e-07	< 1e-07	0.1	233.442	907.593	0.25721
225	730468	MED26	< 1e-07	< 1e-07	0.1	540.498	149.508	3.61518
226	5340338	E2F2	< 1e-07	< 1e-07	0.1	114.014	580.154	0.196523
227	3120598	AKR1C4	< 1e-07	< 1e-07	0.1	541.797	142.521	3.80152
228	4250537	DNAJB4	< 1e-07	< 1e-07	0.1	1704.06	423.385	4.02485
229	1400044	HSPA12A	< 1e-07	< 1e-07	0.1	1250.71	345.015	3.62509
230	830113	TNFRSF10D	< 1e-07	< 1e-07	0.1	1224.84	290.621	4.21456
231	4570131	SIRT4	< 1e-07	< 1e-07	0.1	528.041	144.81	3.64645
232	4540139	RSRC2	< 1e-07	< 1e-07	0.1	2504.95	674.04	3.71633
233	6900414	PTHLH	< 1e-07	< 1e-07	0.1	374.112	97.3654	3.84235
234	1260162	DNMT1	< 1e-07	< 1e-07	0.1	664.504	3634.85	0.182814
235	7550112	CITED2	< 1e-07	< 1e-07	0.1	4750.14	18306.2	0.259483
236	1820497	TIGD2	< 1e-07	< 1e-07	0.1	138.964	505.506	0.274901
237	7650025	TAF6L	< 1e-07	< 1e-07	0.1	123.022	501.819	0.245152
238	6590661	MED22	< 1e-07	< 1e-07	0.1	265.95	1102.33	0.241261
239	3830349	IL7R	< 1e-07	< 1e-07	0.1	199.204	946.339	0.2105
240	6020598	PMAIP1	< 1e-07	< 1e-07	0.1	872.353	182.554	4.77861
241	6960072	HSPD1	< 1e-07	< 1e-07	0.1	16056.1	4504.41	3.56452
242	4570224	C17orf53	< 1e-07	< 1e-07	0.1	115.328	445.213	0.259041
243	270068	SMOX	< 1e-07	< 1e-07	0.1	2139.15	588.285	3.63624
244	3120037	C5orf30	< 1e-07	< 1e-07	0.1	231.184	1030.61	0.224316
245	2640719	RN7SK	< 1e-07	< 1e-07	0.1	3267.12	303.605	10.7611
246	3390110	WDR33	< 1e-07	< 1e-07	0.1	271.999	1214	0.224051
247	360192	INSIG1	< 1e-07	< 1e-07	0.1	2577.11	557.126	4.62572
248	4540725	PDHB	< 1e-07	< 1e-07	0.1	1547.66	6996.28	0.221212
249	5690274	MCM6	< 1e-07	< 1e-07	0.1	1102.09	4878.12	0.225925
250	5720482	HERC5	< 1e-07	< 1e-07	0.1	422.938	102.307	4.13399
251	7000746	C3orf31	< 1e-07	< 1e-07	0.1	185.111	785.495	0.235662
252	2470079	ZNF207	< 1e-07	< 1e-07	0.1	741.207	2825.3	0.262346
253	7160167	ALKBH1	< 1e-07	< 1e-07	0.1	968.35	249.048	3.8882
254	160097	MELK	< 1e-07	< 1e-07	0.1	209.399	1070.07	0.195688
255	7380634	C20orf20	< 1e-07	< 1e-07	0.1	455.243	1672.72	0.272157
256	1110736	CSNK1D	< 1e-07	< 1e-07	0.1	271.714	1130.82	0.24028
257	1580435	TGM2	< 1e-07	< 1e-07	0.1	3298.84	11804.2	0.279463
258	5560253	LOC642897	< 1e-07	< 1e-07	0.1	172.437	667.727	0.258245
259	4180452	ATP1B1	< 1e-07	< 1e-07	0.1	1840.23	468.382	3.92892
260	1170326	POLE2	< 1e-07	< 1e-07	0.1	108.535	474.199	0.228881
261	1710753	ARL5B	< 1e-07	< 1e-07	0.1	701.183	185.389	3.78222
262	4120133	HYAL2	< 1e-07	< 1e-07	0.1	129.567	478.471	0.270793
263	2650379	GREM1	< 1e-07	< 1e-07	0.1	4638.73	19262.6	0.240815
264	6620026	CD83	< 1e-07	< 1e-07	0.1	638.8	126.822	5.03699
265	1660632	ZNF207	< 1e-07	< 1e-07	0.1	553.081	2226.62	0.248394
266	1980669	SNORD68	< 1e-07	< 1e-07	0.1	984.767	234.128	4.2061
267	5360070	CCNB2	< 1e-07	< 1e-07	0.1	273.664	1007.1	0.271736
268	2190326	DIO2	< 1e-07	< 1e-07	0.1	341.931	1450.64	0.235711
269	510180	FOXD2	< 1e-07	< 1e-07	0.1	619.716	148.917	4.1615
270	1470215	MAP3K8	< 1e-07	< 1e-07	0.1	1481.25	312.338	4.74247
271	430368	ZNF211	< 1e-07	< 1e-07	0.1	776.225	202.121	3.8404
272	5090671	GDF15	< 1e-07	< 1e-07	0.1	3918.79	924.395	4.2393
273	2680372	SH2D4A	< 1e-07	< 1e-07	0.1	184.847	695.473	0.265786
274	1780730	CCDC59	< 1e-07	< 1e-07	0.1	7711.59	2163.77	3.56396
275	5900246		< 1e-07	< 1e-07	0.1	178.074	627.108	0.28396
276	5670180	TUBG1	< 1e-07	< 1e-07	0.1	740.386	2512.1	0.294727
277	4180142	KIAA1370	< 1e-07	< 1e-07	0.1	1223.81	314.868	3.88675
278	3840376	ATOH8	< 1e-07	< 1e-07	0.1	111.392	426.298	0.2613
279	7150491	LOC346887	< 1e-07	< 1e-07	0.1	947.291	229.323	4.13082
280	1010435	C1orf55	< 1e-07	< 1e-07	0.1	2198.31	579.706	3.79211
281	4670750	TNFRSF1A	< 1e-07	< 1e-07	0.1	689.512	2426.28	0.284185
282	6270427	IGBP1	< 1e-07	< 1e-07	0.1	2974.73	832.256	3.57429
283	1170300	MT1G	< 1e-07	< 1e-07	0.1	205.849	783.349	0.262781
284	6770026	AURKB	< 1e-07	< 1e-07	0.1	115.189	736.479	0.156405
285	610437	CD24	< 1e-07	< 1e-07	0.1	402.372	110.366	3.64579
286	5420528	DNAJB4	< 1e-07	< 1e-07	0.1	1949.88	481.602	4.04874
287	520682	CPA4	< 1e-07	< 1e-07	0.1	2711.07	771.797	3.51267
288	6420050	NPTX2	< 1e-07	< 1e-07	0.1	1817.98	335.436	5.41976
289	2370373	EGR3	< 1e-07	< 1e-07	0.1	601.909	113.718	5.29299
290	520528	CCDC99	< 1e-07	< 1e-07	0.1	335.931	1221.85	0.274938
291	3930605	CYR61	< 1e-07	< 1e-07	0.1	3622.8	12306.4	0.294384
292	5670468	EIF5	< 1e-07	< 1e-07	0.1	3127.89	901.377	3.47012
293	4290072	SERTAD1	< 1e-07	< 1e-07	0.1	6447.48	1831.99	3.51939
294	4850142	KIAA1370	< 1e-07	< 1e-07	0.1	1368.69	353.69	3.86976
295	940670	TRAM2	< 1e-07	< 1e-07	0.1	1349.53	4783.03	0.282149
296	4040753	MEIS1	< 1e-07	< 1e-07	0.1	171.03	786.265	0.217523
297	6110048	ZNF823	< 1e-07	< 1e-07	0.1	653.431	170.374	3.83527
298	3310445	MRPS26	< 1e-07	< 1e-07	0.1	181.348	646.999	0.280292
299	5270519	ALPK2	< 1e-07	< 1e-07	0.1	1423.88	4940.04	0.288233
300	20500	BRF2	< 1e-07	< 1e-07	0.1	1972.8	446.212	4.42122
301	6770576	C21orf91	< 1e-07	< 1e-07	0.1	549.052	150.943	3.63748
302	1980112	C9orf90	< 1e-07	< 1e-07	0.1	1253.91	368.729	3.40063
303	5080100	ZNF408	< 1e-07	< 1e-07	0.1	556.7	156.804	3.55029
304	5390497	C7orf53	< 1e-07	< 1e-07	0.1	516.579	97.3053	5.30884
305	7550008	RNF216	< 1e-07	< 1e-07	0.1	247.197	933.86	0.264705
306	6620292	C10orf54	< 1e-07	< 1e-07	0.1	994.158	232.874	4.26909
307	6290494	MCM3	< 1e-07	< 1e-07	0.1	157.236	733.696	0.214307
308	4760056	ELOVL4	< 1e-07	< 1e-07	0.1	1814.46	406.954	4.45864
309	150543	FAM83D	< 1e-07	< 1e-07	0.1	1557.84	327.516	4.75653
310	6510025	NSMCE4A	< 1e-07	< 1e-07	0.1	273.075	1073.81	0.254305
311	5090289	EFNB2	< 1e-07	< 1e-07	0.1	3903.73	1163.48	3.35522
312	1430402	NUP85	< 1e-07	< 1e-07	0.1	199.604	882.686	0.226132
313	520309	RLF	< 1e-07	< 1e-07	0.1	552.667	157.354	3.51226
314	290593	FGF2	< 1e-07	< 1e-07	0.1	943.482	3538.85	0.266607
315	2650242	LOC728951	< 1e-07	< 1e-07	0.1	122.06	474.509	0.257235
316	3180470	SDHA	< 1e-07	< 1e-07	0.1	278.698	1039.98	0.267985
317	3990619	TOP2A	< 1e-07	< 1e-07	0.1	260.321	1374.43	0.189403
318	7330253	MCM5	< 1e-07	< 1e-07	0.1	188.406	934.018	0.201715
319	4570468	ZNF263	< 1e-07	< 1e-07	0.1	1486.17	381.985	3.89064
320	2850575	RRM1	< 1e-07	< 1e-07	0.1	1177.45	4293.81	0.274221
321	2810328	RBM12	< 1e-07	< 1e-07	0.1	115.773	383.023	0.30226
322	4610189	HERPUD1	< 1e-07	< 1e-07	0.1	11361.4	3108.77	3.65461
323	1820196	OVGP1	< 1e-07	< 1e-07	0.1	596.154	170.615	3.49415
324	7200037	SFRS4	< 1e-07	< 1e-07	0.1	973.882	3267.74	0.29803
325	3360056	ALKBH1	< 1e-07	< 1e-07	0.1	952.498	236.046	4.03522
326	360047	GAS1	< 1e-07	< 1e-07	0.1	1396.95	5273.03	0.264923
327	6280360	SPG7	< 1e-07	< 1e-07	0.1	275.088	1294.3	0.212538
328	1340475	BRD2	< 1e-07	< 1e-07	0.1	10249.8	2636.97	3.88697
329	3890220	TM2D3	< 1e-07	< 1e-07	0.1	440.478	1413.7	0.311579
330	1030438	RWDD1	< 1e-07	< 1e-07	0.1	415.148	128.776	3.2238
331	730491	C1orf116	< 1e-07	< 1e-07	0.1	443.602	110.728	4.00624
332	3310524	CACYBP	< 1e-07	< 1e-07	0.1	4670.98	922.15	5.06531
333	4850091	EMG1	< 1e-07	< 1e-07	0.1	367.99	1379.97	0.266666
334	4200541	FAM113B	< 1e-07	< 1e-07	0.1	225.462	879.076	0.256476
335	2970019	HIST1H4H	< 1e-07	< 1e-07	0.1	674.591	142.405	4.73714
336	2690047	ARL6IP1	< 1e-07	< 1e-07	0.1	8550.58	2604.88	3.28253
337	2260242	TWIST2	< 1e-07	< 1e-07	0.1	733.409	2869.68	0.255571
338	20653	SIX4	< 1e-07	< 1e-07	0.1	3141.66	958.179	3.27878
339	5390102	SASH1	< 1e-07	< 1e-07	0.1	509.934	1773.21	0.287577
340	6660152	KLHL12	< 1e-07	< 1e-07	0.1	260.533	872.881	0.298475
341	3990523	AZIN1	< 1e-07	< 1e-07	0.1	780.234	157.381	4.95762
342	2850059	CRY1	< 1e-07	< 1e-07	0.1	1645.13	502.108	3.27645
343	5050241	ABHD3	< 1e-07	< 1e-07	0.1	778.25	154.191	5.04733
344	5960475	RHPN2	< 1e-07	< 1e-07	0.1	2120.48	574.628	3.69017
345	2370138	TRIM26	< 1e-07	< 1e-07	0.1	1367.45	370.441	3.69141
346	6770242	MARCKSL1	< 1e-07	< 1e-07	0.1	4973.58	1515.48	3.28184
347	4480504	ZNF828	< 1e-07	< 1e-07	0.1	404.717	1330.96	0.304079
348	5220731	TXNL4B	< 1e-07	< 1e-07	0.1	384.456	107.826	3.56553
349	4850497	NXF1	< 1e-07	< 1e-07	0.1	2086.73	503.73	4.14255
350	7380255	CENTD3	< 1e-07	< 1e-07	0.1	209.914	673.386	0.311729
351	4570458	HERPUD1	< 1e-07	< 1e-07	0.1	8395.1	2299.81	3.65034
352	830019	PPARG	< 1e-07	< 1e-07	0.1	770.432	183.41	4.20061
353	5820608	ZC3H4	< 1e-07	< 1e-07	0.1	298.376	1063.37	0.280596
354	6110630	HIST1H2BK	< 1e-07	< 1e-07	0.1	17914.8	5437.59	3.29462
355	4230286	ZSWIM1	< 1e-07	< 1e-07	0.1	123.36	462.362	0.266804
356	110110	HSPE1	< 1e-07	< 1e-07	0.1	8742.65	1872.61	4.6687
357	6100382	RTKN	< 1e-07	< 1e-07	0.1	132.213	410.799	0.321844
358	5270307	NXT2	< 1e-07	< 1e-07	0.1	621.504	194.371	3.19752
359	4050687	DLL1	< 1e-07	< 1e-07	0.1	387.524	119.972	3.23013
360	6350747		< 1e-07	< 1e-07	0.1	537.007	152.001	3.53293
361	60243	C16orf52	< 1e-07	< 1e-07	0.1	444.995	142.506	3.12264
362	4200068	NUP62	< 1e-07	< 1e-07	0.1	1441.78	4456.66	0.323512
363	6180253	CDC42EP2	< 1e-07	< 1e-07	0.1	224.127	704.793	0.318004
364	7200561	OTUD1	< 1e-07	< 1e-07	0.1	638.72	170.493	3.74631
365	5490356	NXF1	< 1e-07	< 1e-07	0.1	2536.39	728.158	3.4833
366	870131	HSPA5	< 1e-07	< 1e-07	0.1	10444.5	3104.65	3.36415
367	3930382	NMT2	< 1e-07	< 1e-07	0.1	330.13	1059	0.311736
368	6040634	IRX2	< 1e-07	< 1e-07	0.1	785.374	226.977	3.46014
369	1050356	LPAR1	< 1e-07	< 1e-07	0.1	1309.96	4238.39	0.30907
370	1940253	CRY1	< 1e-07	< 1e-07	0.1	1187.28	355.041	3.34406
371	1230477	IRX5	< 1e-07	< 1e-07	0.1	604.112	180.476	3.34733
372	4880215	GTF2B	< 1e-07	< 1e-07	0.1	1766.72	528.594	3.34231
373	2940343	XPO4	< 1e-07	< 1e-07	0.1	213.594	666.138	0.320645
374	2450452	SLC9A3R1	< 1e-07	< 1e-07	0.1	1744.23	542.817	3.21329
375	5690333	XPO1	< 1e-07	< 1e-07	0.1	681.867	2184.55	0.312131
376	6980592		< 1e-07	< 1e-07	0.1	503.474	157.01	3.20664
377	4640095	RPL9	< 1e-07	< 1e-07	0.1	3696.08	1098.33	3.36518
378	1450370	DCP1A	< 1e-07	< 1e-07	0.1	961.151	224.821	4.27518
379	7000739	TMEM31	< 1e-07	< 1e-07	0.1	331.525	109.545	3.02639
380	6220600	LOC113386	< 1e-07	< 1e-07	0.1	1559.25	458.302	3.40223
381	1430138	MAFF	< 1e-07	< 1e-07	0.1	814.148	262.063	3.10669
382	5860546	ZNF22	< 1e-07	< 1e-07	0.1	279.003	1308.68	0.213194
383	5860463	NEK6	< 1e-07	< 1e-07	0.1	183.53	603.088	0.304316
384	4640161	C17orf97	< 1e-07	< 1e-07	0.1	128.956	435.644	0.296013
385	7000356	RXRA	< 1e-07	< 1e-07	0.1	321.023	1099.59	0.291947
386	6110279	NET1	< 1e-07	< 1e-07	0.1	1240.69	257.975	4.80937
387	4050156	ERBB2	< 1e-07	< 1e-07	0.1	456.268	1412.1	0.323112
388	5090368	HSPA4	< 1e-07	< 1e-07	0.1	8337.28	2664.36	3.12919
389	2680170	HSPE1	< 1e-07	< 1e-07	0.1	17959.6	4968.63	3.61459
390	940079	LOC728956	< 1e-07	< 1e-07	0.1	163.093	633.416	0.257481
391	4060768	DBT	< 1e-07	< 1e-07	0.1	248.031	804.942	0.308135
392	2450088	C21orf91	< 1e-07	< 1e-07	0.1	423.204	139.781	3.02761
393	7050575	PPAP2B	< 1e-07	< 1e-07	0.1	1186.53	3658.32	0.324338
394	5910364	TYMS	< 1e-07	< 1e-07	0.1	496.252	2281.49	0.217512
395	2630474	MLLT11	< 1e-07	< 1e-07	0.1	2555.8	833.058	3.06797
396	430050	BAMBI	< 1e-07	< 1e-07	0.1	5796.51	1289.28	4.49593
397	2490719	STK17B	< 1e-07	< 1e-07	0.1	765.773	246.548	3.10598
398	610056	CENPB	< 1e-07	< 1e-07	0.1	1599.84	5020.28	0.318676
399	7000379	USP38	< 1e-07	< 1e-07	0.1	3371.87	1081.38	3.11813
400	4120152	RIOK2	< 1e-07	< 1e-07	0.1	2917.71	790.684	3.69011
401	4890731	RFC5	< 1e-07	< 1e-07	0.1	138.365	626.021	0.221023
402	6770403	EPM2AIP1	< 1e-07	< 1e-07	0.1	150.469	531.382	0.283165
403	2340056	FAM108B1	< 1e-07	< 1e-07	0.1	596.768	173.673	3.43616
404	1050201	ZNF670	< 1e-07	< 1e-07	0.1	545.923	123.847	4.40806
405	7550575	BTF3	< 1e-07	< 1e-07	0.1	931.488	290.645	3.2049
406	610152	DAB2	< 1e-07	< 1e-07	0.1	1464.15	4618.29	0.317032
407	2710307	MFAP3	< 1e-07	< 1e-07	0.1	932.67	293.883	3.17361
408	290603	AARS	< 1e-07	< 1e-07	0.1	2755.42	8358.75	0.329645
409	2970379	NET1	< 1e-07	< 1e-07	0.1	588.896	168.436	3.49626
410	4010097	FBXO5	< 1e-07	< 1e-07	0.1	213.291	705.425	0.302358
411	4220468	ATP1B1	< 1e-07	< 1e-07	0.1	3555.62	1154.36	3.08017
412	3450300	C18orf19	< 1e-07	< 1e-07	0.1	581.47	175.648	3.31042
413	3360735	ZNF473	< 1e-07	< 1e-07	0.1	751.196	228.069	3.29372
414	5290475	CDKN1A	< 1e-07	< 1e-07	0.1	574.681	133.916	4.29136
415	2350703	STX3	< 1e-07	< 1e-07	0.1	1023.83	268.19	3.81755
416	460358	CA2	< 1e-07	< 1e-07	0.1	281.012	92.2766	3.04532
417	60397	TRK1	< 1e-07	< 1e-07	0.1	522.181	122.96	4.24677
418	3420300	EEF2K	< 1e-07	< 1e-07	0.1	215.415	799.112	0.269567
419	4220431	EXT1	< 1e-07	< 1e-07	0.1	664.513	3324.8	0.199866
420	1340470	CECR5	< 1e-07	< 1e-07	0.1	413.637	1416.36	0.292043
421	6770630	DHDH	< 1e-07	< 1e-07	0.1	303.813	97.423	3.1185
422	4210681	FMN2	< 1e-07	< 1e-07	0.1	187.652	643.371	0.29167
423	20241	SLC7A1	< 1e-07	< 1e-07	0.1	1457.21	4490.92	0.32448
424	60338	LOC728946	< 1e-07	< 1e-07	0.1	163.359	527.677	0.309581
425	6280129	LOC440900	< 1e-07	< 1e-07	0.1	436.577	142.982	3.05336
426	4120053	PFKFB3	< 1e-07	< 1e-07	0.1	4077.52	1318.64	3.09222
427	3840437	EAF1	< 1e-07	< 1e-07	0.1	818.698	202.193	4.04909
428	6560427	KIAA0391	< 1e-07	< 1e-07	0.1	248.373	826.414	0.300543
429	2480722	UBE2T	< 1e-07	< 1e-07	0.1	162.748	601.406	0.270613
430	6650687	PIGA	< 1e-07	< 1e-07	0.1	1393.69	450.631	3.09276
431	6180470	FAM108B1	< 1e-07	< 1e-07	0.1	1002.08	310.657	3.22567
432	1780446	PCK2	< 1e-07	< 1e-07	0.1	1465.42	4525.7	0.323799
433	2140711	HSPA4	< 1e-07	< 1e-07	0.1	776.345	223.612	3.47184
434	1430280	CEBPA	< 1e-07	< 1e-07	0.1	396.999	119.463	3.32319
435	6450075	TFAP2C	< 1e-07	< 1e-07	0.1	2341.96	695.719	3.36625
436	6200025	C11orf41	< 1e-07	< 1e-07	0.1	127.95	459.967	0.278172
437	2490379	RPL34	< 1e-07	< 1e-07	0.1	1946.26	633.257	3.07342
438	7610152	UBAP2L	< 1e-07	< 1e-07	0.1	240.08	819.124	0.293093
439	6560468	INTS9	< 1e-07	< 1e-07	0.1	224.067	704.11	0.318227
440	6660446	WDR51A	< 1e-07	< 1e-07	0.1	259.797	965.212	0.26916
441	990167	C1orf52	< 1e-07	< 1e-07	0.1	3845.6	1263.56	3.04346
442	3520768	TAGLN3	< 1e-07	< 1e-07	0.1	310.563	93.7873	3.31136
443	5130563	GFPT2	< 1e-07	< 1e-07	0.1	644.955	142.864	4.51447
444	3990594	COG3	< 1e-07	< 1e-07	0.1	589.136	192.899	3.05411
445	830056	FOXA1	< 1e-07	< 1e-07	0.1	310.848	106.12	2.92923
446	7050433	RDH10	< 1e-07	< 1e-07	0.1	2281.37	7085.63	0.321971
447	4480592	CHMP6	< 1e-07	< 1e-07	0.1	167.685	523.868	0.320091
448	7150598	GSTM3	< 1e-07	< 1e-07	0.1	631.204	209.944	3.00653
449	6960056	JTV1	< 1e-07	< 1e-07	0.1	1146.05	3265.44	0.350963
450	7040148	WDR47	< 1e-07	< 1e-07	0.1	930.77	295.775	3.14689
451	2650608	CCNA2	< 1e-07	< 1e-07	0.1	185.067	751.136	0.246383
452	5820601	CCND1	< 1e-07	< 1e-07	0.1	8284.98	25205.8	0.328694
453	540725	HNRPH1	< 1e-07	< 1e-07	0.1	1627.3	507.813	3.20453
454	3180521	SPRYD3	< 1e-07	< 1e-07	0.1	307.045	939.817	0.326707
455	2340626	TFB1M	< 1e-07	< 1e-07	0.1	127.634	425.055	0.300278
456	6550026	TICAM2	< 1e-07	< 1e-07	0.1	2358.94	801.699	2.94242
457	5900433	KIF20B	< 1e-07	< 1e-07	0.1	133.668	489.042	0.273326
458	3310504	PDK4	< 1e-07	< 1e-07	0.1	349.843	104.272	3.3551
459	940685	NAV1	< 1e-07	< 1e-07	0.1	185.637	701.316	0.264698
460	990128	MBNL2	< 1e-07	< 1e-07	0.1	888.797	2616.09	0.339743
461	6860047		< 1e-07	< 1e-07	0.1	1161.73	307.436	3.77878
462	3400360	MAPRE2	< 1e-07	< 1e-07	0.1	1774.75	615.028	2.88564
463	1110397		< 1e-07	< 1e-07	0.1	290.653	89.3063	3.25456
464	1300674	FADD	< 1e-07	< 1e-07	0.1	450.556	1451.96	0.310308
465	670286	CDK6	< 1e-07	< 1e-07	0.1	674.538	1974.61	0.341606
466	6960768	ZNF22	< 1e-07	< 1e-07	0.1	240.548	945.217	0.25449
467	4260750	SFRS17A	< 1e-07	< 1e-07	0.1	1010.42	292.14	3.45869
468	6650220	FASTKD5	< 1e-07	< 1e-07	0.1	1048.55	368.744	2.84356
469	3710553	SMOX	< 1e-07	< 1e-07	0.1	1201.84	309.819	3.87918
470	4060296	DTWD1	< 1e-07	< 1e-07	0.1	333.485	1054.94	0.316116
471	2710161	SELK	< 1e-07	< 1e-07	0.1	3720.81	1135.99	3.2754
472	6450041	RBM24	< 1e-07	< 1e-07	0.1	1209.51	406.441	2.97586
473	7570673	UPP1	< 1e-07	< 1e-07	0.1	2983.71	1022.96	2.91675
474	730162	ZNF16	< 1e-07	< 1e-07	0.1	789.461	269.095	2.93377
475	870546	MAD2L1	< 1e-07	< 1e-07	0.1	255.71	1005.37	0.254343
476	3390411	TFAP2C	< 1e-07	< 1e-07	0.1	1293.29	439.297	2.94401
477	1070189	AXIN2	< 1e-07	< 1e-07	0.1	416.346	147.016	2.83197
478	6660270	MRPL17	< 1e-07	< 1e-07	0.1	745.836	2549.69	0.292521
479	990315	TCP1	< 1e-07	< 1e-07	0.1	5835.7	1462.92	3.98909
480	620487	CDKN2B	< 1e-07	< 1e-07	0.1	676.238	230.069	2.93928
481	4180577	FXR1	< 1e-07	< 1e-07	0.1	2622.68	864.351	3.03428
482	6590594	HIST1H2AC	< 1e-07	< 1e-07	0.1	1690.4	573.869	2.94562
483	2760452	RPS29	< 1e-07	< 1e-07	0.1	3201.25	1067.13	2.99986
484	50201	LRRC8C	< 1e-07	< 1e-07	0.1	552.181	188.942	2.92249
485	7570195	KIAA0355	< 1e-07	< 1e-07	0.1	526.51	1711.66	0.307603
486	5340010	SNAI1	< 1e-07	< 1e-07	0.1	346.144	103.319	3.35023
487	2690187	AFAP1	< 1e-07	< 1e-07	0.1	262.679	757.054	0.346975
488	1470195	MCM7	< 1e-07	< 1e-07	0.1	1095.47	4541.8	0.241197
489	2490113	CD248	< 1e-07	< 1e-07	0.1	5363.41	15480.7	0.346458
490	360270	NAV3	< 1e-07	< 1e-07	0.1	208.13	626.71	0.3321
491	6580504	LOC124512	< 1e-07	< 1e-07	0.1	486.583	1434.83	0.339122
492	7210497	NUAK1	< 1e-07	< 1e-07	0.1	658.32	2300.59	0.286153
493	3420241	SLC2A14	< 1e-07	< 1e-07	0.1	440.926	137.95	3.19627
494	2340392	MELK	< 1e-07	< 1e-07	0.1	122.232	422.792	0.289106
495	4610731	CHAF1B	< 1e-07	< 1e-07	0.1	126.43	368.862	0.342758
496	6110079	CRYAB	< 1e-07	< 1e-07	0.1	18728.9	6265.15	2.98937
497	2810605	ZNF266	< 1e-07	< 1e-07	0.1	594.66	203.992	2.91511
498	1050176	GCM1	< 1e-07	< 1e-07	0.1	322.797	108.328	2.97981
499	2690608	RPS7	< 1e-07	< 1e-07	0.1	4406.48	810.58	5.43621
500	4280743	RPL37	< 1e-07	< 1e-07	0.1	760.691	213.62	3.56096
501	990100	TFB2M	< 1e-07	< 1e-07	0.1	3292.74	1170.72	2.81257
502	5570682	ASAM	< 1e-07	< 1e-07	0.1	378.251	1218.12	0.310519
503	6350446	TSC22D3	< 1e-07	< 1e-07	0.1	1903.82	633.278	3.00629
504	7210435	RFC4	< 1e-07	< 1e-07	0.1	201.958	1016.62	0.198657
505	20068	OTUD1	< 1e-07	< 1e-07	0.1	354.004	115.257	3.07144
506	6130441	ASPM	< 1e-07	< 1e-07	0.1	130.125	508.312	0.255994
507	1770279	DERA	< 1e-07	< 1e-07	0.1	1315.76	3810.94	0.345259
508	6380324	CKAP2L	< 1e-07	< 1e-07	0.1	116.758	465.064	0.251059
509	6020209	SPECC1L	< 1e-07	< 1e-07	0.1	1032.81	3105.73	0.332548
510	3440358	SLFN11	< 1e-07	< 1e-07	0.1	966.441	334.535	2.88891
511	3890343	FGF2	< 1e-07	< 1e-07	0.1	314.135	1062.03	0.295789
512	5700301	C14orf129	< 1e-07	< 1e-07	0.1	2927.71	955.368	3.06448
513	5960398	NT5E	< 1e-07	< 1e-07	0.1	458.161	1372.56	0.3338
514	6110187	CSNK2A2	< 1e-07	< 1e-07	0.1	2804.17	937.174	2.99215
515	2850091	SAFB2	< 1e-07	< 1e-07	0.1	1431.71	467.795	3.06054
516	4570543	VPS25	< 1e-07	< 1e-07	0.1	318.606	867.165	0.367412
517	4810703	KCNK1	< 1e-07	< 1e-07	0.1	883.245	285.352	3.09528
518	630278	H1F0	< 1e-07	< 1e-07	0.1	696.033	2445.22	0.284651
519	5090095	KIFC1	< 1e-07	< 1e-07	0.1	140.521	600.194	0.234126
520	7050670	SAFB2	< 1e-07	< 1e-07	0.1	1110.17	402.803	2.75612
521	6660195	RPUSD3	< 1e-07	< 1e-07	0.1	311.919	909.307	0.34303
522	2490017	ZC3H12A	< 1e-07	< 1e-07	0.1	467.807	141.788	3.29935
523	6960300		< 1e-07	< 1e-07	0.1	266.795	750.39	0.355542
524	2810364	KLHDC2	< 1e-07	< 1e-07	0.1	515.684	1462	0.352724
525	430639	PCF11	< 1e-07	< 1e-07	0.1	637.869	215.452	2.96061
526	2900041	H2AFY2	< 1e-07	< 1e-07	0.1	219.598	731.632	0.300149
527	1050706	CDC2	< 1e-07	< 1e-07	0.1	191.547	866.913	0.220952
528	1660019	SNCAIP	< 1e-07	< 1e-07	0.1	485.882	154.826	3.13824
529	4070053	BCAR3	< 1e-07	< 1e-07	0.1	414.23	1642.83	0.252144
530	3940097	LIX1L	< 1e-07	< 1e-07	0.1	129.955	414.149	0.313789
531	5870725	TTK	< 1e-07	< 1e-07	0.1	122.521	351.581	0.348487
532	2120544	IMP3	< 1e-07	< 1e-07	0.1	695.567	2576.1	0.270008
533	770692	C9orf114	< 1e-07	< 1e-07	0.1	224.026	646.375	0.346588
534	1690735	NEDD1	< 1e-07	< 1e-07	0.1	277.272	803.24	0.345192
535	5420575	SLC3A2	< 1e-07	< 1e-07	0.1	8264.37	3028.62	2.72876
536	3840288	LRFN3	< 1e-07	< 1e-07	0.1	268.622	852.879	0.314959
537	7400368	RUNX1	< 1e-07	< 1e-07	0.1	315.504	1051.66	0.300006
538	3390544	HSP90AA1	< 1e-07	< 1e-07	0.1	14447.8	4827.38	2.99289
539	7100220	XYLT2	< 1e-07	< 1e-07	0.1	569.51	1521.8	0.374234
540	1410653	TERF2IP	< 1e-07	< 1e-07	0.1	2387.14	881.214	2.70892
541	3390292	KLF9	< 1e-07	< 1e-07	0.1	957.467	2794.65	0.342607
542	1410408	ARID5B	< 1e-07	< 1e-07	0.1	2219.73	6709.45	0.330836
543	1660020	ARHGEF17	< 1e-07	< 1e-07	0.1	215.734	622.602	0.346503
544	4590064	CDK2	< 1e-07	< 1e-07	0.1	363.355	1260.7	0.288217
545	2510201	ESPNL	< 1e-07	< 1e-07	0.1	126.667	358.218	0.353602
546	2490754	MAP1LC3B	< 1e-07	< 1e-07	0.1	6083.39	2145.49	2.83543
547	2100139	ZRANB2	< 1e-07	< 1e-07	0.1	1015.71	298.319	3.40479
548	1450255	COX19	< 1e-07	< 1e-07	0.1	517.329	189.953	2.72346
549	2970195	DDX3X	< 1e-07	< 1e-07	0.1	5696.38	1966.83	2.89623
550	3930367	DAB2	< 1e-07	< 1e-07	0.1	1396.08	4468.63	0.312419
551	5220035	TUFT1	< 1e-07	< 1e-07	0.1	2912.68	938.158	3.10468
552	1240541	RBM4	< 1e-07	< 1e-07	0.1	1043.4	356.296	2.92846
553	4780215	C4orf27	< 1e-07	< 1e-07	0.1	277.21	772.648	0.358779
554	6180592		< 1e-07	< 1e-07	0.1	451.198	122.925	3.67052
555	7210685	MKL1	< 1e-07	< 1e-07	0.1	129.021	365.336	0.353158
556	2680021	TBC1D2	< 1e-07	< 1e-07	0.1	308.482	868.663	0.355123
557	7050193	RAB40C	< 1e-07	< 1e-07	0.1	596.644	2052.66	0.290669
558	5270296	TFB2M	< 1e-07	< 1e-07	0.1	4057.3	1286.92	3.15273
559	4230136	TCP1	< 1e-07	< 1e-07	0.1	541.315	177.132	3.056
560	3890187	PRMT6	< 1e-07	< 1e-07	0.1	122.137	330.969	0.369028
561	5310070	SHPK	< 1e-07	< 1e-07	0.1	140.479	412.42	0.34062
562	6860768	RAE1	< 1e-07	< 1e-07	0.1	3551.44	1222.38	2.90536
563	2450725	SLC3A2	< 1e-07	< 1e-07	0.1	4511.28	1407.62	3.20489
564	1500192	HIST3H2A	< 1e-07	< 1e-07	0.1	718.307	196.623	3.65322
565	6350647	SMARCAL1	< 1e-07	< 1e-07	0.1	265.208	755.121	0.351212
566	520332	B4GALT7	< 1e-07	< 1e-07	0.1	360.721	1028.64	0.350679
567	7400554	WDR18	< 1e-07	< 1e-07	0.1	666.414	1890.9	0.352432
568	70767	BAIAP2	< 1e-07	< 1e-07	0.1	1192.39	370.861	3.2152
569	4010184	C8orf13	< 1e-07	< 1e-07	0.1	331.186	961.149	0.344573
570	5570187	S1PR3	< 1e-07	< 1e-07	0.1	1128.41	393.355	2.86868
571	3850754	KIAA1683	< 1e-07	< 1e-07	0.1	326.828	117.803	2.77435
572	3180446	MED16	< 1e-07	< 1e-07	0.1	544.561	1471.13	0.370165
573	4120411	ARHGEF2	< 1e-07	< 1e-07	0.1	1827.51	5351.74	0.34148
574	4050195	FAM10A4	< 1e-07	< 1e-07	0.1	4196.36	1572.66	2.66831
575	1500010	CDC20	< 1e-07	< 1e-07	0.1	415.028	1507.47	0.275314
576	4850612	UNG	< 1e-07	< 1e-07	0.1	486.364	1637.76	0.296969
577	7160239	FOSB	< 1e-07	< 1e-07	0.1	12025.4	3750.44	3.2064
578	3140750	RBM38	< 1e-07	< 1e-07	0.1	417.666	130.195	3.20801
579	2940438	PTGER4	< 1e-07	< 1e-07	0.1	336.61	110.583	3.04396
580	3310273	TCEAL7	< 1e-07	< 1e-07	0.1	1054.32	388.939	2.71076
581	3460689		< 1e-07	< 1e-07	0.1	364.396	124.122	2.93579
582	3830647	VPS37B	< 1e-07	< 1e-07	0.1	2237.59	660.441	3.38803
583	5130093	PHLDB1	< 1e-07	< 1e-07	0.1	462.322	1472.01	0.314075
584	2470348	NFKBIZ	< 1e-07	< 1e-07	0.1	3381.5	1192.14	2.83649
585	730288	COG3	< 1e-07	< 1e-07	0.1	633.748	213.21	2.97242
586	2320626	FLRT3	< 1e-07	< 1e-07	0.1	790.103	185.814	4.25211
587	6660196	SHFM1	< 1e-07	< 1e-07	0.1	1079.2	415.889	2.59493
588	5360653	CPT2	< 1e-07	< 1e-07	0.1	266.244	857.628	0.310442
589	1240309	FOXRED1	< 1e-07	< 1e-07	0.1	127.502	340.77	0.37416
590	1240592	C7orf47	< 1e-07	< 1e-07	0.1	198.589	543.226	0.365574
591	1940524	STS-1	< 1e-07	< 1e-07	0.1	861.359	2442.51	0.352653
592	7200014	RNF152	< 1e-07	< 1e-07	0.1	355.622	122.119	2.91209
593	7380164	STX4	< 1e-07	< 1e-07	0.1	315.726	979.645	0.322287
594	7510408	NRIP1	< 1e-07	< 1e-07	0.1	359.766	1069.81	0.33629
595	2630747	KCTD5	< 1e-07	< 1e-07	0.1	662.121	228.522	2.8974
596	2970437	PLEKHA2	< 1e-07	< 1e-07	0.1	549.576	1428.77	0.38465
597	2370670	C1R	< 1e-07	< 1e-07	0.1	3384.11	1218.64	2.77695
598	4390193	CPZ	< 1e-07	< 1e-07	0.1	1617.51	584.397	2.76783
599	3120326	ANGPT1	< 1e-07	< 1e-07	0.1	549.405	1564.68	0.35113
600	670037		< 1e-07	< 1e-07	0.1	508.249	183.919	2.76344
601	6980162	GALE	< 1e-07	< 1e-07	0.1	132.858	412.538	0.322052
602	4200608	SPATA2	< 1e-07	< 1e-07	0.1	648.173	203.507	3.18501
603	6860382	OGFR	< 1e-07	< 1e-07	0.1	144.378	424.834	0.339846
604	7000161	OIP5	< 1e-07	< 1e-07	0.1	137.373	372.137	0.369146
605	2470136	TLE4	< 1e-07	< 1e-07	0.1	117.306	311.683	0.376364
606	5560338	IVNS1ABP	< 1e-07	< 1e-07	0.1	410.587	1055.44	0.389021
607	1820075	QPCT	< 1e-07	< 1e-07	0.1	537.793	188.814	2.84828
608	6020719	RAB23	< 1e-07	< 1e-07	0.1	1840.41	4656.43	0.395242
609	1570553	IL8	< 1e-07	< 1e-07	0.1	817.655	195.234	4.18808
610	2320253	USMG5	< 1e-07	< 1e-07	0.1	2403.51	843.867	2.84821
611	1090102	ZNF274	< 1e-07	< 1e-07	0.1	1304.61	496.864	2.62569
612	2970674	LEO1	< 1e-07	< 1e-07	0.1	223.5	617.374	0.362018
613	1780348	FH	< 1e-07	< 1e-07	0.1	1615.14	4397.08	0.367321
614	7200598	MED6	< 1e-07	< 1e-07	0.1	4519.71	1724.11	2.62147
615	1340349	SNUPN	< 1e-07	< 1e-07	0.1	253.065	681.092	0.371558
616	6040379	ZBTB11	< 1e-07	< 1e-07	0.1	370.249	131.128	2.82358
617	5690341		< 1e-07	< 1e-07	0.1	1096.71	3387.77	0.323726
618	5910543	GLOD4	< 1e-07	< 1e-07	0.1	260.302	786.646	0.330901
619	3990152	DYRK3	< 1e-07	< 1e-07	0.1	568.969	199.77	2.84811
620	70504	GREM1	< 1e-07	< 1e-07	0.1	1393.61	4051.05	0.344014
621	7550064	KCTD5	< 1e-07	< 1e-07	0.1	4441.03	1735.95	2.55827
622	1070551	CSRP2BP	< 1e-07	< 1e-07	0.1	207.537	619.36	0.335083
623	1260037	BNC1	< 1e-07	< 1e-07	0.1	266.146	101.165	2.63082
624	4570239	LOR	< 1e-07	< 1e-07	0.1	322.645	97.5936	3.30601
625	1940193	KCNK12	< 1e-07	< 1e-07	0.1	307.323	95.2522	3.22642
626	3990131	NUP107	< 1e-07	< 1e-07	0.1	219.685	615.187	0.357102
627	3610753	LOC85389	< 1e-07	< 1e-07	0.1	420.663	114.203	3.68346
628	6940446	MEX3B	< 1e-07	< 1e-07	0.1	753.467	246.201	3.06037
629	520255	TUBB6	< 1e-07	< 1e-07	0.1	719.146	2079.35	0.345851
630	7330026	FRAT2	< 1e-07	< 1e-07	0.1	678.781	248.002	2.737
631	3850221	DSEL	< 1e-07	< 1e-07	0.1	280.325	800.539	0.35017
632	10487	SLC25A25	< 1e-07	< 1e-07	0.1	2923.46	1079.67	2.70774
633	7550070	LOC730316	< 1e-07	< 1e-07	0.1	4582.75	1715.68	2.67109
634	5820672	HIC2	< 1e-07	< 1e-07	0.1	451.472	175.214	2.57668
635	6840477		< 1e-07	< 1e-07	0.1	1159.82	350.74	3.30678
636	6590725	RAD23B	< 1e-07	< 1e-07	0.1	505.485	1299.26	0.389056
637	2940301	HPS6	< 1e-07	< 1e-07	0.1	724.255	1969.31	0.367772
638	770221	C20orf177	< 1e-07	< 1e-07	0.1	185.216	477.611	0.387797
639	2320187	MED16	< 1e-07	< 1e-07	0.1	455.473	1221.57	0.372858
640	5820392	CCT6A	< 1e-07	< 1e-07	0.1	3303.12	1306.31	2.52859
641	5570296	DTL	< 1e-07	< 1e-07	0.1	116.612	360.641	0.323347
642	5560561	TNS3	< 1e-07	< 1e-07	0.1	2397.34	6151.22	0.389734
643	130022	CDCA5	< 1e-07	< 1e-07	0.1	522.317	1790.55	0.291708
644	3420561	RPA2	< 1e-07	< 1e-07	0.1	1099.94	3048.18	0.360851
645	2340059	C16orf53	< 1e-07	< 1e-07	0.1	134.472	446.506	0.301165
646	2630433	CDT1	< 1e-07	< 1e-07	0.1	175.578	520.55	0.337294
647	1010376	JAG1	< 1e-07	< 1e-07	0.1	545.485	206.993	2.63528
648	360280	PNRC2	< 1e-07	< 1e-07	0.1	3012.9	1193.43	2.52458
649	670603	PLAGL1	< 1e-07	< 1e-07	0.1	632.11	222.359	2.84274
650	4250372	KLHDC3	< 1e-07	< 1e-07	0.1	835.816	2343.96	0.356583
651	6220097	PPAP2B	< 1e-07	< 1e-07	0.1	332.847	866.622	0.384074
652	1770717	HIRIP3	< 1e-07	< 1e-07	0.1	142.179	417.067	0.340902
653	4810187	STAT1	< 1e-07	< 1e-07	0.1	1383.46	3474	0.398232
654	240400	PMEPA1	< 1e-07	< 1e-07	0.1	811.664	313.788	2.58666
655	5820630	LOC644816	< 1e-07	< 1e-07	0.1	389.478	134.724	2.89092
656	5080471	MAP3K6	< 1e-07	< 1e-07	0.1	265.495	723.293	0.367064
657	6450475	YRDC	< 1e-07	< 1e-07	0.1	2786.94	1068.73	2.60772
658	5870202	FBXO33	< 1e-07	< 1e-07	0.1	1886.75	679.595	2.77629
659	2450114		< 1e-07	< 1e-07	0.1	427.995	1168.29	0.366342
660	2760768	TNRC6B	< 1e-07	< 1e-07	0.1	158.853	490.8	0.323661
661	4610056	FLRT2	< 1e-07	< 1e-07	0.1	183.396	523.292	0.350466
662	6860544	FOXK1	< 1e-07	< 1e-07	0.1	274.191	837.461	0.327408
663	3180450	C16orf72	< 1e-07	< 1e-07	0.1	2345.46	825.483	2.84132
664	450097	AFTPH	< 1e-07	< 1e-07	0.1	799.356	295.657	2.70366
665	7320021	HMBS	< 1e-07	< 1e-07	0.1	450.38	1141.91	0.394409
666	2600278	C1orf54	< 1e-07	< 1e-07	0.1	1285.99	501.423	2.56469
667	3460132	PAQR4	< 1e-07	< 1e-07	0.1	210.517	747.247	0.281724
668	5890608	C14orf129	< 1e-07	< 1e-07	0.1	1242.13	443.09	2.80333
669	7550333	PACSIN2	< 1e-07	< 1e-07	0.1	1232.23	3304.47	0.372899
670	7560367	SMAD5	< 1e-07	< 1e-07	0.1	705.461	2014.16	0.350251
671	1440296	H3F3B	< 1e-07	< 1e-07	0.1	3158.21	1259.65	2.50723
672	5690554	PPM1D	< 1e-07	< 1e-07	0.1	1010.86	335.579	3.01229
673	3780554	CRBN	< 1e-07	< 1e-07	0.1	224.311	613.482	0.365636
674	1300719	C14orf149	< 1e-07	< 1e-07	0.1	277.291	804.015	0.344883
675	4590020	YOD1	< 1e-07	< 1e-07	0.1	927.432	332.899	2.78592
676	1470576	CTH	< 1e-07	< 1e-07	0.1	522.076	151.12	3.45471
677	4880161	SLC3A2	< 1e-07	< 1e-07	0.1	1407.19	405.532	3.46999
678	150343		< 1e-07	< 1e-07	0.1	3231.99	8374.17	0.385947
679	3520121	RPL28	< 1e-07	< 1e-07	0.1	1135.81	410.767	2.7651
680	70707	WDR6	< 1e-07	< 1e-07	0.1	1236.79	3090.43	0.400201
681	650681	CTDSP2	< 1e-07	< 1e-07	0.1	1232.62	3763.24	0.327541
682	6450300	GEMIN4	< 1e-07	< 1e-07	0.1	356.534	1052.49	0.338752
683	380369	TRRAP	< 1e-07	< 1e-07	0.1	292.662	866.005	0.337945
684	5290307	FBXO30	< 1e-07	< 1e-07	0.1	1101.85	424.769	2.594
685	2570020	CTR9	< 1e-07	< 1e-07	0.1	745.23	284.237	2.62186
686	4180408	SNORD55	< 1e-07	< 1e-07	0.1	321.17	127.303	2.52288
687	360050	C7orf27	< 1e-07	< 1e-07	0.1	217.141	697.473	0.311325
688	3890544	NUP37	< 1e-07	< 1e-07	0.1	825.78	2373.34	0.34794
689	6060482	ATP1B1	< 1e-07	< 1e-07	0.1	1876.02	716.135	2.61964
690	3060398	PTPRF	< 1e-07	< 1e-07	0.1	1517.07	3834.94	0.395591
691	7210634	ZBED5	< 1e-07	< 1e-07	0.1	205.04	546.481	0.3752
692	6650672	ZNF439	< 1e-07	< 1e-07	0.1	500.538	201.024	2.48994
693	2810064	BTLA	< 1e-07	< 1e-07	0.1	278.667	97.3708	2.86192
694	4230195	NAV2	< 1e-07	< 1e-07	0.1	291.563	824.465	0.353639
695	5090010	ZNF35	< 1e-07	< 1e-07	0.1	709.919	275.228	2.57939
696	1230164		< 1e-07	< 1e-07	0.1	613.114	231.751	2.64557
697	5690300	LOC642775	< 1e-07	< 1e-07	0.1	238.336	94.4787	2.52264
698	70605	HSPD1	< 1e-07	< 1e-07	0.1	18514	7538.98	2.45578
699	5420719	C2orf42	< 1e-07	< 1e-07	0.1	1190.17	470.906	2.52741
700	1570092	TUBB6	< 1e-07	< 1e-07	0.1	1466.78	3674.53	0.399174
701	830446	RUNDC1	< 1e-07	< 1e-07	0.1	185.908	567.01	0.327875
702	450161	FAHD1	< 1e-07	< 1e-07	0.1	349.46	1184.15	0.295113
703	6980487	MRPS12	< 1e-07	< 1e-07	0.1	366.262	129.141	2.83614
704	1770730	SPAG9	< 1e-07	< 1e-07	0.1	1489.77	584.106	2.55052
705	10161	MOBKL2A	< 1e-07	< 1e-07	0.1	136.479	360.08	0.379025
706	2450148	PARP4	< 1e-07	< 1e-07	0.1	763.297	1940.02	0.393448
707	5360630	C16orf80	< 1e-07	< 1e-07	0.1	2124.18	826.348	2.57057
708	1500280	IFIT3	< 1e-07	< 1e-07	0.1	145.414	454.377	0.320029
709	6960025	DPY30	< 1e-07	< 1e-07	0.1	1207.54	3031.61	0.398316
710	4560541	MLKL	< 1e-07	< 1e-07	0.1	949.479	333.012	2.85118
711	4780563	GABBR2	< 1e-07	< 1e-07	0.1	283.31	912.702	0.310408
712	1660528	CKLF	< 1e-07	< 1e-07	0.1	879.027	2308.72	0.380743
713	3440608	DNAJC14	< 1e-07	< 1e-07	0.1	142.415	375.259	0.379511
714	520561	RAI1	< 1e-07	< 1e-07	0.1	150.052	374.778	0.400374
715	1430278	CTSK	< 1e-07	< 1e-07	0.1	1497.15	598.934	2.49969
716	1230731	NFXL1	< 1e-07	< 1e-07	0.1	624.913	232.22	2.69104
717	4480600	C20orf127	< 1e-07	< 1e-07	0.1	364.752	1184.2	0.308016
718	430196	MRPL14	< 1e-07	< 1e-07	0.1	842.205	2219.52	0.379453
719	6450021	ANAPC4	< 1e-07	< 1e-07	0.1	232.678	565.301	0.4116
720	6580577	HNRNPD	< 1e-07	< 1e-07	0.1	4860.14	12056.3	0.403122
721	2510048	FBXO30	< 1e-07	< 1e-07	0.1	1117.19	440.144	2.53824
722	1770187	ANKRD50	< 1e-07	< 1e-07	0.1	144.139	432.966	0.332912
723	4050681	NDUFV2	< 1e-07	< 1e-07	0.1	1526.47	3954.32	0.386027
724	2260309	RPPH1	< 1e-07	< 1e-07	0.1	773.676	216.371	3.5757
725	1440209	RGS10	< 1e-07	< 1e-07	0.1	718.824	289.101	2.48641
726	6550025	TTC15	< 1e-07	< 1e-07	0.1	478.243	1174.27	0.407267
727	5080364	ACTN1	< 1e-07	< 1e-07	0.1	5457.6	15249.6	0.357885
728	6550386		< 1e-07	< 1e-07	0.1	4526.48	11071.8	0.408828
729	1110037	DYRK3	< 1e-07	< 1e-07	0.1	624.194	214.664	2.90777
730	3780092	TNFRSF21	< 1e-07	< 1e-07	0.1	1668.5	688.287	2.42413
731	3520056	ETNK1	< 1e-07	< 1e-07	0.1	512.96	206.333	2.48608
732	1690681	TNFAIP1	< 1e-07	< 1e-07	0.1	336.309	817.814	0.411229
733	2490450	LOC91561	< 1e-07	< 1e-07	0.1	1983.79	812.71	2.44095
734	6270138	TACSTD2	< 1e-07	< 1e-07	0.1	381.201	140.325	2.71656
735	1820343	WNT5A	< 1e-07	< 1e-07	0.1	1909.43	4928.11	0.387456
736	5220504	CHCHD7	< 1e-07	< 1e-07	0.1	927.477	353.956	2.62032
737	3800482	MGC61598	< 1e-07	< 1e-07	0.1	376.362	135.876	2.76989
738	1470601	PFKFB3	< 1e-07	< 1e-07	0.1	629.042	249.745	2.51874
739	1580719	THADA	< 1e-07	< 1e-07	0.1	119.333	296.681	0.402226
740	630161	RCAN2	< 1e-07	< 1e-07	0.1	783.075	286.746	2.7309
741	3710373	SNHG3-RCC1	< 1e-07	< 1e-07	0.1	914.424	355.632	2.57127
742	4570546	LEAP2	< 1e-07	< 1e-07	0.1	267.17	95.6109	2.79435
743	2640670	IDI1	< 1e-07	< 1e-07	0.1	616.027	229.345	2.68603
744	3060563	NR2C2AP	< 1e-07	< 1e-07	0.1	135.51	352.036	0.384931
745	3440348	ASH2L	< 1e-07	< 1e-07	0.1	646.741	1617.37	0.399873
746	540204	KCNS3	< 1e-07	< 1e-07	0.1	430.129	167.233	2.57203
747	2450546	MBNL2	< 1e-07	< 1e-07	0.1	473.921	1261.18	0.375777
748	7330301	LOC653874	< 1e-07	< 1e-07	0.1	178.167	457.227	0.389668
749	430672	HSPA8	< 1e-07	< 1e-07	0.1	37284.8	14937.2	2.4961
750	7560538	ITCH	< 1e-07	< 1e-07	0.1	138.594	344.187	0.402671
751	7150349	TPD52L1	< 1e-07	< 1e-07	0.1	2456.79	793.442	3.09637
752	1570189	ZNF669	< 1e-07	< 1e-07	0.1	312.131	120.952	2.58061
753	2940168	SNRPG	< 1e-07	< 1e-07	0.1	3385.03	8806.65	0.384372
754	7400669	ZC3H5	< 1e-07	< 1e-07	0.1	132.334	362.023	0.365542
755	6860719	PSCD1	< 1e-07	< 1e-07	0.1	1003.52	389.89	2.57386
756	4890437	ZBED5	< 1e-07	< 1e-07	0.1	204.132	522.15	0.390946
757	2640544	ASS1	< 1e-07	< 1e-07	0.1	5156.95	2054.27	2.51036
758	1770646	EXO1	< 1e-07	< 1e-07	0.1	125.339	503.739	0.248817
759	3780291	CLDN15	< 1e-07	< 1e-07	0.1	403.525	150.533	2.68064
760	2510392	TMEM43	< 1e-07	< 1e-07	0.1	1593.63	4579.28	0.348009
761	3940500	OSR1	< 1e-07	< 1e-07	0.1	875.131	319.796	2.73653
762	6350240	SMYD4	< 1e-07	< 1e-07	0.1	104.066	258.742	0.402202
763	7150259	C7orf49	< 1e-07	< 1e-07	0.1	172.701	452.422	0.381725
764	1980088		< 1e-07	< 1e-07	0.1	336.965	884.87	0.380808
765	3840092	PFAS	< 1e-07	< 1e-07	0.1	160.228	500.181	0.320341
766	4810128	PHLDA2	< 1e-07	< 1e-07	0.1	642.087	268.221	2.39387
767	990598	BCCIP	< 1e-07	< 1e-07	0.1	803.944	1924.95	0.417643
768	990500	AVPI1	< 1e-07	< 1e-07	0.1	5124.26	2017.84	2.53947
769	4070608	CBLL1	< 1e-07	< 1e-07	0.1	2095.31	735.281	2.84967
770	670673	BCL2L1	< 1e-07	< 1e-07	0.1	1356.11	3215.21	0.42178
771	620255	FZD4	< 1e-07	< 1e-07	0.1	523.145	1476.57	0.354298
772	6220368	POGK	< 1e-07	< 1e-07	0.1	514.35	1377.89	0.373287
773	2000022	IRF9	< 1e-07	< 1e-07	0.1	740.69	1834.19	0.403825
774	5720424	NRP1	< 1e-07	< 1e-07	0.1	784.517	2126.21	0.368974
775	510731	RRM2	< 1e-07	< 1e-07	0.1	101.283	403.569	0.250968
776	1820324	APAF1	< 1e-07	< 1e-07	0.1	1296.81	517.82	2.50437
777	7550431	REV1	< 1e-07	< 1e-07	0.1	156.13	390.283	0.400043
778	5290037	HEATR2	< 1e-07	< 1e-07	0.1	226.794	584.058	0.388307
779	7040431	PRDM8	< 1e-07	< 1e-07	0.1	673.372	280.256	2.4027
780	290333	CDCA4	< 1e-07	< 1e-07	0.1	306.281	878.837	0.348507
781	360424	SDHA	< 1e-07	< 1e-07	0.1	253.063	712.176	0.355338
782	1240333		< 1e-07	< 1e-07	0.1	181.5	447.766	0.405345
783	4610632	MOCOS	< 1e-07	< 1e-07	0.1	507.945	1383.8	0.367066
784	5670181	TMEM181	< 1e-07	< 1e-07	0.1	1352.75	3204.12	0.42219
785	3180553	C12orf32	< 1e-07	< 1e-07	0.1	191.084	589.522	0.324134
786	3420195	ATPBD1B	< 1e-07	< 1e-07	0.1	1112.28	450.044	2.47149
787	5290097	PPP1R14B	< 1e-07	< 1e-07	0.1	2593.33	6348.53	0.408492
788	5700373	TRIP13	< 1e-07	< 1e-07	0.1	164.575	523.621	0.314302
789	5870040	SUPV3L1	< 1e-07	< 1e-07	0.1	859.202	346.485	2.47976
790	1440091	GON4L	< 1e-07	< 1e-07	0.1	113.103	265.138	0.426582
791	1070288	METT11D1	< 1e-07	< 1e-07	0.1	179.544	433.438	0.414234
792	2630601		< 1e-07	< 1e-07	0.1	475.248	1155.93	0.411137
793	4060131	C3orf58	< 1e-07	< 1e-07	0.1	887.035	325.368	2.72625
794	1410201	CD59	< 1e-07	< 1e-07	0.1	507.106	1373.99	0.369075
795	510209	LOC643310	< 1e-07	< 1e-07	0.1	4490.12	1797.14	2.49848
796	770286	RMI1	< 1e-07	< 1e-07	0.1	158.424	396.231	0.399826
797	3520689	DDX19A	< 1e-07	< 1e-07	0.1	229.539	564.629	0.406531
798	610270	ELL2	< 1e-07	< 1e-07	0.1	1570.84	3925.94	0.400117
799	730709	LOC730525	< 1e-07	< 1e-07	0.1	478.091	175.866	2.71849
800	1780719	PTGES3	< 1e-07	< 1e-07	0.1	6787.3	2762.56	2.45689
801	6660343	RBM14	< 1e-07	< 1e-07	0.1	8168.75	2590.17	3.15374
802	1850468	CCDC56	< 1e-07	< 1e-07	0.1	1354.81	3421.98	0.395913
803	3120653	NSUN4	< 1e-07	< 1e-07	0.1	206.643	503.537	0.410383
804	6590224	WFS1	< 1e-07	< 1e-07	0.1	1310.94	3119.61	0.420226
805	6060356	RPL13A	< 1e-07	< 1e-07	0.1	6460.94	2254.23	2.86613
806	7560041	AXUD1	< 1e-07	< 1e-07	0.1	5841.38	2312.26	2.52627
807	6860373	RIC8A	< 1e-07	< 1e-07	0.1	1207.69	2969.49	0.406699
808	2450639	TSC22D1	< 1e-07	< 1e-07	0.1	2291.27	886.343	2.58508
809	3940059	C20orf29	< 1e-07	< 1e-07	0.1	121.719	304.456	0.399793
810	3800176	BCLAF1	< 1e-07	< 1e-07	0.1	832.046	2210.55	0.376397
811	1110114	DIMT1L	< 1e-07	< 1e-07	0.1	999.703	2621.08	0.381409
812	6420575	ITSN1	< 1e-07	< 1e-07	0.1	517.384	1331	0.388718
813	1990379	SLFN11	< 1e-07	< 1e-07	0.1	2158.74	883.726	2.44277
814	2570707	N6AMT1	< 1e-07	< 1e-07	0.1	123.585	318.271	0.3883
815	6020564	RRAGA	< 1e-07	< 1e-07	0.1	3521.26	8194.52	0.429708
816	6370474	CDCA3	< 1e-07	< 1e-07	0.1	109.129	332.887	0.327825
817	4390450	SGK	< 1e-07	< 1e-07	0.1	12442	5395.6	2.30595
818	4200692	NEU1	< 1e-07	< 1e-07	0.1	1201.75	490.989	2.4476
819	4220180	WDR68	< 1e-07	< 1e-07	0.1	1740.58	743.659	2.34056
820	20195	SUV39H1	< 1e-07	< 1e-07	0.1	304.54	759.38	0.401038
821	430315	TUBGCP5	< 1e-07	< 1e-07	0.1	103.118	249.19	0.413814
822	2190563	BRD9	< 1e-07	< 1e-07	0.1	781.894	1896.61	0.412258
823	4230066	C16orf53	< 1e-07	< 1e-07	0.1	98.2838	229.007	0.429173
824	130228	HDHD1A	< 1e-07	< 1e-07	0.1	159.45	419.723	0.379893
825	5080156	CLP1	< 1e-07	< 1e-07	0.1	923.976	375.892	2.45809
826	7330575	KLHL28	< 1e-07	< 1e-07	0.1	924.89	380.422	2.43122
827	5870646	L3MBTL2	< 1e-07	< 1e-07	0.1	165.7	406.572	0.407554
828	5310681	LOC653344	< 1e-07	< 1e-07	0.1	504.19	213.211	2.36475
829	430446	KRT81	< 1e-07	< 1e-07	0.1	983.419	2856.59	0.344263
830	6760669	SPRY1	< 1e-07	< 1e-07	0.1	875.946	338.326	2.58906
831	4590356	HNRNPD	< 1e-07	< 1e-07	0.1	2381.58	5981.94	0.398128
832	1770546	ATIC	< 1e-07	< 1e-07	0.1	1293.28	3195.49	0.40472
833	5960324	ARL6IP1	< 1e-07	< 1e-07	0.1	347.208	134.541	2.58067
834	3890164	KIAA0895	< 1e-07	< 1e-07	0.1	309.846	129.339	2.3956
835	2120452	MLPH	< 1e-07	< 1e-07	0.1	205.68	631.148	0.325882
836	430026	SFRS1	< 1e-07	< 1e-07	0.1	1031.15	2767.95	0.372533
837	430142	HSPA4	< 1e-07	< 1e-07	0.1	1231.14	311.567	3.95144
838	1690156	NUAK1	< 1e-07	< 1e-07	0.1	886.933	3001.1	0.295536
839	2470600	KATNAL1	< 1e-07	< 1e-07	0.1	321.065	877.077	0.366062
840	3190524	KNTC1	< 1e-07	< 1e-07	0.1	143.74	445.608	0.322571
841	2140228	CDR2	< 1e-07	< 1e-07	0.1	3194.08	1092.05	2.92484
842	50368	DCN	< 1e-07	< 1e-07	0.1	2078.23	881.965	2.35636
843	3460270	ZHX3	< 1e-07	< 1e-07	0.1	138.376	382.988	0.361306
844	1090400	ATXN2	< 1e-07	< 1e-07	0.1	1356.72	3187.51	0.425636
845	2650553	TPD52L1	< 1e-07	< 1e-07	0.1	1546	641.176	2.41119
846	3190470	PLK4	< 1e-07	< 1e-07	0.1	112.625	318.634	0.353462
847	5690202	AKIRIN2	< 1e-07	< 1e-07	0.1	4953.5	2074.9	2.38734
848	4540435	HN1	< 1e-07	< 1e-07	0.1	1393.41	435.001	3.20325
849	840768	SDF2	< 1e-07	< 1e-07	0.1	5378.22	2054.34	2.61798
850	3610386	CPEB3	< 1e-07	< 1e-07	0.1	400.951	169.966	2.35901
851	1410736	TMEM42	< 1e-07	< 1e-07	0.1	351.461	872.456	0.402841
852	1990079	FBXO32	< 1e-07	< 1e-07	0.1	1232.28	379.374	3.24819
853	2810082	C20orf111	< 1e-07	< 1e-07	0.1	4678.64	1602.39	2.91979
854	6180195	RAB3B	< 1e-07	< 1e-07	0.1	1058.67	2812.06	0.376476
855	580692	ID1	< 1e-07	< 1e-07	0.1	136.943	341.419	0.4011
856	1740594	RBM24	< 1e-07	< 1e-07	0.1	761.804	288.17	2.64359
857	5860039	CALB2	< 1e-07	< 1e-07	0.1	395.098	129.937	3.04068
858	1820470	NOL7	< 1e-07	< 1e-07	0.1	2467.3	6170.37	0.399863
859	6040703	TRIM39	< 1e-07	< 1e-07	0.1	1078.82	429.292	2.51302
860	4810053	ANKRD13C	< 1e-07	< 1e-07	0.1	771.317	264.946	2.91122
861	4280672	KRT86	< 1e-07	< 1e-07	0.1	224.917	662.783	0.339352
862	1980762	SAT2	< 1e-07	< 1e-07	0.1	1497.68	614.13	2.43871
863	3990544	KIAA1666	< 1e-07	< 1e-07	0.1	371.283	133.983	2.77113
864	520356	FXR1	< 1e-07	< 1e-07	0.1	3903.63	1546.28	2.52453
865	840554	RYBP	< 1e-07	< 1e-07	0.1	3251.36	1248.5	2.60422
866	4540064	C17orf70	< 1e-07	< 1e-07	0.1	898.12	2143.84	0.418931
867	3840398	RSRC2	< 1e-07	< 1e-07	0.1	412.218	147.812	2.7888
868	1110022	KIF11	< 1e-07	< 1e-07	0.1	186.313	475.346	0.391952
869	1780300	TSHZ1	< 1e-07	< 1e-07	0.1	261.63	727.095	0.35983
870	730576	SPRY4	< 1e-07	< 1e-07	0.1	2103.42	814.212	2.58338
871	4860646	FAM20C	< 1e-07	< 1e-07	0.1	508.861	1421.19	0.358052
872	3440017	TRPC4AP	< 1e-07	< 1e-07	0.1	846.228	2010.71	0.420861
873	5860278	ALAS1	< 1e-07	< 1e-07	0.1	381.011	147.029	2.5914
874	6270288	SNRPB2	< 1e-07	< 1e-07	0.1	3743.78	1513.81	2.47308
875	5550719	DCN	< 1e-07	< 1e-07	0.1	7048.66	2991.07	2.35657
876	6860300	SMARCA4	< 1e-07	< 1e-07	0.1	960.502	2280.44	0.421192
877	5910164	LARP2	< 1e-07	< 1e-07	0.1	692.888	287.826	2.40732
878	730193	TRQ1	< 1e-07	< 1e-07	0.1	262.101	110.506	2.37181
879	4120114	IL12A	< 1e-07	< 1e-07	0.1	327.287	113.007	2.89618
880	110711	TM2D2	< 1e-07	< 1e-07	0.1	1039.66	404.432	2.57067
881	4540072	C16orf75	< 1e-07	< 1e-07	0.1	260.016	746.491	0.348318
882	5390180	ASXL1	< 1e-07	< 1e-07	0.1	138.412	428.307	0.323161
883	2680215	KCNK2	< 1e-07	< 1e-07	0.1	240.958	614.59	0.392063
884	2350563	MPHOSPH10	< 1e-07	< 1e-07	0.1	1216.86	445.741	2.72997
885	1510608		< 1e-07	< 1e-07	0.1	894.594	2551.93	0.350556
886	6350632	TSC22D3	< 1e-07	< 1e-07	0.1	1986.01	774.325	2.56482
887	60014	FAM84B	< 1e-07	< 1e-07	0.1	466.892	191.735	2.43509
888	6590520	C14orf131	< 1e-07	< 1e-07	0.1	143.108	345.87	0.413763
889	630167	SDCBP	< 1e-07	< 1e-07	0.1	2834.16	1157.85	2.44777
890	50370	RANBP6	< 1e-07	< 1e-07	0.1	113.872	277.364	0.41055
891	7160433	UBN1	< 1e-07	< 1e-07	0.1	1773.22	737.893	2.40309
892	380056	B3GNT2	< 1e-07	< 1e-07	0.1	548.048	193.478	2.83261
893	4900386	TOP3B	< 1e-07	< 1e-07	0.1	104.822	257.196	0.407557
894	2230279	TOP1P2	< 1e-07	< 1e-07	0.1	731.575	257.992	2.83566
895	3370603	SPAG9	< 1e-07	< 1e-07	0.1	1094.17	430.258	2.54306
896	2190241	AP1M1	< 1e-07	< 1e-07	0.1	664.074	1677.39	0.395896
897	3460053	SIPA1L2	< 1e-07	< 1e-07	0.1	431.72	183.632	2.35101
898	6840164	GPNMB	< 1e-07	< 1e-07	0.1	1676.28	687.186	2.43934
899	2850192	PPCS	< 1e-07	< 1e-07	0.1	647.112	1579.44	0.409708
900	4830577	MRPS16	< 1e-07	< 1e-07	0.1	266.291	620.98	0.428824
901	2030315	RFC4	< 1e-07	< 1e-07	0.1	219.244	658.004	0.333196
902	2640725	ARSJ	< 1e-07	< 1e-07	0.1	167.203	392.861	0.425604
903	650639	NR4A2	< 1e-07	< 1e-07	0.1	462.547	156.845	2.94908
904	2760689	MAGEE1	< 1e-07	< 1e-07	0.1	123.723	299.51	0.413084
905	1110372	FAM130A1	< 1e-07	< 1e-07	0.1	1036.01	428.136	2.41982
906	6560725	C16orf59	< 1e-07	< 1e-07	0.1	100.054	263.915	0.379114
907	4250398	STK4	< 1e-07	< 1e-07	0.1	574.919	1474.7	0.389855
908	2760131	ZNF20	< 1e-07	< 1e-07	0.1	706.213	267.904	2.63607
909	730528	PLAUR	< 1e-07	< 1e-07	0.1	1517.86	628.535	2.41491
910	1770541	SERP1	< 1e-07	< 1e-07	0.1	1488.81	485.738	3.06505
911	160575	LOC644029	< 1e-07	< 1e-07	0.1	2059.17	871.864	2.36181
912	5090500	KITLG	< 1e-07	< 1e-07	0.1	624.614	1510.13	0.413616
913	1710189	RHBDF1	< 1e-07	< 1e-07	0.1	1185.97	2825.89	0.419681
914	4730369	BTG1	< 1e-07	< 1e-07	0.1	10702.4	4762.03	2.24745
915	2370132	TNFRSF11B	< 1e-07	< 1e-07	0.1	3331.1	8109.45	0.410768
916	4180209	PLAGL2	< 1e-07	< 1e-07	0.1	761.669	340.336	2.23799
917	430270	TAF7	< 1e-07	< 1e-07	0.1	1672.52	688.53	2.42911
918	1070411	SPC25	< 1e-07	< 1e-07	0.1	107.901	283.633	0.380426
919	2100341	C14orf2	< 1e-07	< 1e-07	0.1	1902.55	828.054	2.29762
920	380102	TMEM51	< 1e-07	< 1e-07	0.1	598.375	238.409	2.50987
921	4890463	EXOSC10	< 1e-07	< 1e-07	0.1	435.031	1213.27	0.358562
922	6220113	DEPDC7	< 1e-07	< 1e-07	0.1	402.764	153.548	2.62304
923	6040743	ZADH2	< 1e-07	< 1e-07	0.1	126.958	367.731	0.345247
924	2650619	HSPA8	< 1e-07	< 1e-07	0.1	35490.9	14062.6	2.52379
925	4390349	ZNF256	< 1e-07	< 1e-07	0.1	421.332	174.645	2.41251
926	1230682	BIRC5	< 1e-07	< 1e-07	0.1	262.67	802.615	0.327269
927	2940576	MEPCE	< 1e-07	< 1e-07	0.1	563.484	1294.66	0.435237
928	610523	C14orf142	< 1e-07	< 1e-07	0.1	781.471	315.164	2.47957
929	6200468	CKS2	< 1e-07	< 1e-07	0.1	4559.45	1625.78	2.80447
930	7380202	NR2F2	< 1e-07	< 1e-07	0.1	674.51	1784.91	0.377895
931	6560148	TCEB3	< 1e-07	< 1e-07	0.1	1026.83	445.999	2.30232
932	4590537	ERAL1	< 1e-07	< 1e-07	0.1	583.338	1434.75	0.406577
933	5390070	LOC731777	< 1e-07	< 1e-07	0.1	991.67	365.47	2.71341
934	1990300	SOCS1	< 1e-07	< 1e-07	0.1	405.45	158.988	2.5502
935	770202	HNT	< 1e-07	< 1e-07	0.1	162.374	559.861	0.290026
936	2060037	ZBTB43	< 1e-07	< 1e-07	0.1	600.055	240.632	2.49366
937	6100630	MUM1	< 1e-07	< 1e-07	0.1	552.131	1334.13	0.41385
938	4830220	ZNF193	< 1e-07	< 1e-07	0.1	581.078	246.196	2.36023
939	1990253	TDG	< 1e-07	< 1e-07	0.1	3493.54	1447.25	2.41392
940	1570154	GPNMB	< 1e-07	< 1e-07	0.1	594.812	231.749	2.56662
941	2140753	RPL14	< 1e-07	< 1e-07	0.1	2122.16	769.871	2.75651
942	940274	GK	< 1e-07	< 1e-07	0.1	167.977	400.207	0.419725
943	3290170	PAAF1	< 1e-07	< 1e-07	0.1	316.264	712.377	0.443956
944	4780050	UGDH	< 1e-07	< 1e-07	0.1	5387.74	2357.54	2.28533
945	3400431	CLDN11	< 1e-07	< 1e-07	0.1	617.082	260.369	2.37003
946	1510630	DUS2L	< 1e-07	< 1e-07	0.1	181.109	483.051	0.374927
947	4480477	SBSN	< 1e-07	< 1e-07	0.1	305.391	118.622	2.57448
948	6520402	LEMD3	< 1e-07	< 1e-07	0.1	1432.16	597.272	2.39784
949	840685	IL1B	< 1e-07	< 1e-07	0.1	366.721	152.984	2.39713
950	6110204	MKLN1	< 1e-07	< 1e-07	0.1	398.972	956.413	0.417154
951	2630669	DEPDC7	< 1e-07	< 1e-07	0.1	392.475	150.112	2.61454
952	1510468	GRPEL1	< 1e-07	< 1e-07	0.1	2774.89	1079.61	2.57027
953	2000167	JUB	< 1e-07	< 1e-07	0.1	105.487	237.549	0.444067
954	7210373	PSMD12	< 1e-07	< 1e-07	0.1	2904.01	1221.33	2.37775
955	2230026	KLF5	< 1e-07	< 1e-07	0.1	298.489	123.034	2.42607
956	5220612	ECHDC3	< 1e-07	< 1e-07	0.1	210.568	571.779	0.368269
957	160706		< 1e-07	< 1e-07	0.1	309.324	129.29	2.39248
958	2510678	PKMYT1	< 1e-07	< 1e-07	0.1	131.027	502.649	0.260673
959	4830382	CPEB2	< 1e-07	< 1e-07	0.1	693.318	276.739	2.50532
960	430019	LOC391045	< 1e-07	< 1e-07	0.1	272.855	114.088	2.3916
961	7610301	PABPN1	< 1e-07	< 1e-07	0.1	2108.91	886.432	2.3791
962	60452	GAL	< 1e-07	< 1e-07	0.1	792.046	341.35	2.32033
963	5360524	CACYBP	< 1e-07	< 1e-07	0.1	957.579	381.364	2.51093
964	3990670	KITLG	< 1e-07	< 1e-07	0.1	399.465	894.601	0.446529
965	5220086		< 1e-07	< 1e-07	0.1	356.655	959.779	0.371601
966	7380100	MCL1	< 1e-07	< 1e-07	0.1	1140.96	490.324	2.32694
967	6900086	ADAMTS1	< 1e-07	< 1e-07	0.1	1666.02	4552.21	0.36598
968	1450192	CENPM	< 1e-07	< 1e-07	0.1	168.205	421.468	0.399094
969	3390192	RAB35	< 1e-07	< 1e-07	0.1	298.803	718.037	0.416138
970	3830403	ZNF143	< 1e-07	< 1e-07	0.1	777.162	258.088	3.01123
971	1500609	GTF2H4	< 1e-07	< 1e-07	0.1	228.879	514.958	0.444462
972	6280152	UTP11L	< 1e-07	< 1e-07	0.1	3486.31	1489.89	2.33998
973	5490019	GPX3	< 1e-07	< 1e-07	0.1	266.117	111.607	2.38442
974	1580524	ACSL3	< 1e-07	< 1e-07	0.1	3031.72	1294.73	2.34158
975	7610187	ATF4	< 1e-07	< 1e-07	0.1	3496.45	1138.37	3.07144
976	1770519	PDRG1	< 1e-07	< 1e-07	0.1	1136.49	504.241	2.25386
977	730541	PCID2	< 1e-07	< 1e-07	0.1	1394.75	3112.94	0.448048
978	2140064	GTF3C2	< 1e-07	< 1e-07	0.1	408.666	953.384	0.428648
979	6900288	YTHDC1	< 1e-07	< 1e-07	0.1	6986.3	2796.84	2.49792
980	50543		< 1e-07	< 1e-07	0.1	242.927	554.045	0.43846
981	110719	SLC16A3	< 1e-07	< 1e-07	0.1	7415.46	17827.2	0.415963
982	4010196	GATA2	< 1e-07	< 1e-07	0.1	969.313	389.958	2.48569
983	6280458	BCL6	< 1e-07	< 1e-07	0.1	2878.18	1277.45	2.25306
984	1090026	PMPCA	< 1e-07	< 1e-07	0.1	281.163	698.838	0.402329
985	3940333	ZNF266	< 1e-07	< 1e-07	0.1	292.009	119.415	2.44534
986	5550296	OSBP	< 1e-07	< 1e-07	0.1	6153.39	2683.78	2.29281
987	540524	NMRAL1	< 1e-07	< 1e-07	0.1	491.497	1429.2	0.343896
988	6860082	SLC16A5	< 1e-07	< 1e-07	0.1	273.892	664.118	0.412415
989	6250497	FBXL5	< 1e-07	< 1e-07	0.1	256.848	703.829	0.36493
990	5340162	KIAA1598	< 1e-07	< 1e-07	0.1	352.52	152.14	2.31708
991	5390259	ZNF187	< 1e-07	< 1e-07	0.1	111.407	258.144	0.43157
992	5670075	PAFAH1B1	< 1e-07	< 1e-07	0.1	514.676	1282.41	0.401336
993	6580474	TUBB	< 1e-07	< 1e-07	0.1	7295.16	16648.3	0.438191
994	580711	SMAD6	< 1e-07	< 1e-07	0.1	301.448	711.44	0.423716
995	6110470	LOC727761	< 1e-07	< 1e-07	0.1	523.484	1434.87	0.36483
996	7150600	BIRC2	< 1e-07	< 1e-07	0.1	1388.77	3087.87	0.44975
997	6590156	KIAA0363	< 1e-07	< 1e-07	0.1	196.807	568.342	0.346283
998	3610091	CUTC	< 1e-07	< 1e-07	0.1	216.878	490.744	0.441937
999	7560327	GPN1	< 1e-07	< 1e-07	0.1	2151.81	988.85	2.17607
1000	4390382	KIAA0182	< 1e-07	< 1e-07	0.1	315.792	739.838	0.426839
1001	6980100	VARS	< 1e-07	< 1e-07	0.1	637.084	1561.58	0.407974
1002	5360537	ARHGAP30	< 1e-07	< 1e-07	0.1	627.053	259.102	2.4201
1003	1770333	PDE5A	< 1e-07	< 1e-07	0.1	743.042	2246.09	0.330816
1004	1470497	FBXL3	< 1e-07	< 1e-07	0.1	155.827	459.365	0.339221
1005	6840280	PPP2CB	< 1e-07	< 1e-07	0.1	1356.9	597.58	2.27066
1006	3180289	ETV6	< 1e-07	< 1e-07	0.1	164.375	464.821	0.35363
1007	1170170	STC2	< 1e-07	< 1e-07	0.1	5122.01	11254	0.455128
1008	4200612	PPIL1	< 1e-07	< 1e-07	0.1	281.052	650.912	0.431782
1009	2900450	ADAR	< 1e-07	< 1e-07	0.1	1035.48	2378.55	0.435341
1010	5860707	SAAL1	< 1e-07	< 1e-07	0.1	422.219	983.51	0.429298
1011	3800707	XPO4	< 1e-07	< 1e-07	0.1	140.753	350.755	0.401286
1012	5900706	ZNF670	< 1e-07	< 1e-07	0.1	285.785	116.303	2.45726
1013	5870133	MLF1	< 1e-07	< 1e-07	0.1	304.467	120.804	2.52033
1014	4670487	SIVA	< 1e-07	< 1e-07	0.1	917.678	2153.14	0.426204
1015	3710168	KRT34	< 1e-07	< 1e-07	0.1	7699.1	17922.9	0.429569
1016	7550441	NKRF	< 1e-07	< 1e-07	0.1	685.919	310.396	2.20982
1017	2350348	KRTAP1-3	< 1e-07	< 1e-07	0.1	125.165	293.037	0.427132
1018	2570240	SULF1	< 1e-07	< 1e-07	0.1	6482.87	15811.7	0.410005
1019	4760538	ZC3H3	< 1e-07	< 1e-07	0.1	394.217	909.157	0.433607
1020	6060367	AHR	< 1e-07	< 1e-07	0.1	364.426	151.085	2.41206
1021	6980632	LMTK3	< 1e-07	< 1e-07	0.1	326.72	130.766	2.49851
1022	3310288	LOC647000	< 1e-07	< 1e-07	0.1	3559.43	7793.53	0.456715
1023	6330195	EP400	< 1e-07	< 1e-07	0.1	170.316	457.291	0.372444
1024	5960670	ARID3B	< 1e-07	< 1e-07	0.1	385.925	133.598	2.88869
1025	3390017	CNDP2	< 1e-07	< 1e-07	0.1	1586.75	3811.57	0.416299
1026	430767	CDK9	< 1e-07	< 1e-07	0.1	159.785	424.449	0.376452
1027	7050543	TUBB2B	< 1e-07	< 1e-07	0.1	2171.53	910.184	2.38581
1028	3360681	TNFAIP3	< 1e-07	< 1e-07	0.1	448.882	188.975	2.37535
1029	1170709	CDH2	< 1e-07	< 1e-07	0.1	11039.2	24165.7	0.456815
1030	940240	C1orf112	< 1e-07	< 1e-07	0.1	111.75	269.699	0.414351
1031	2690240	FANCD2	< 1e-07	< 1e-07	0.1	130.964	314.024	0.41705
1032	4860240	DERPC	< 1e-07	< 1e-07	0.1	469.421	216.189	2.17135
1033	5810612	ANPEP	< 1e-07	< 1e-07	0.1	1370.05	3356.75	0.408147
1034	2340008	PDZD8	< 1e-07	< 1e-07	0.1	649.912	281.27	2.31063
1035	6480082	ARHGAP1	< 1e-07	< 1e-07	0.1	1464.94	3823.47	0.383143
1036	990735	RNF149	< 1e-07	< 1e-07	0.1	4320.88	1993.51	2.16747
1037	3990132	SSTR1	< 1e-07	< 1e-07	0.1	316.351	802.073	0.394416
1038	6480468	BEX1	< 1e-07	< 1e-07	0.1	1798.87	4526.66	0.397395
1039	520639	TIGD5	< 1e-07	< 1e-07	0.1	318.572	737.613	0.431895
1040	3780707	DUSP10	< 1e-07	< 1e-07	0.1	549.628	246.668	2.22821
1041	240228	MRGPRF	< 1e-07	< 1e-07	0.1	231.508	553.099	0.418564
1042	4730019	EFNB1	< 1e-07	< 1e-07	0.1	357.651	145.457	2.45881
1043	4060594	ST5	< 1e-07	< 1e-07	0.1	182.327	490.365	0.37182
1044	7400707	C1S	< 1e-07	< 1e-07	0.1	4560.54	1981.49	2.30157
1045	2640300	GPR137C	< 1e-07	< 1e-07	0.1	373.007	156.856	2.37802
1046	1570280	GCC1	< 1e-07	< 1e-07	0.1	1430.85	525.765	2.72146
1047	5360184	RNF6	< 1e-07	< 1e-07	0.1	276.569	124.894	2.21443
1048	2230156	C15orf52	< 1e-07	< 1e-07	0.1	366.895	1176.19	0.311936
1049	630465	SCHIP1	< 1e-07	< 1e-07	0.1	477.96	1065.05	0.448766
1050	1510114	PCK2	< 1e-07	< 1e-07	0.1	261.145	613.83	0.425435
1051	4760431	LOC136143	< 1e-07	< 1e-07	0.1	1589.62	708.429	2.24387
1052	3060682	BPGM	< 1e-07	< 1e-07	0.1	1100.5	405.829	2.71174
1053	1580356	TMED1	< 1e-07	< 1e-07	0.1	413.358	979.285	0.422101
1054	2450494	BTLA	< 1e-07	< 1e-07	0.1	237.406	98.4518	2.4114
1055	7000397	KANK1	< 1e-07	< 1e-07	0.1	251.663	697.827	0.360638
1056	1850364	ZNF550	< 1e-07	< 1e-07	0.1	295.836	124.294	2.38014
1057	5820598	MED16	< 1e-07	< 1e-07	0.1	164.002	413.355	0.39676
1058	5490390	ZGPAT	< 1e-07	< 1e-07	0.1	231.105	513.111	0.450399
1059	4880463	SEC24A	< 1e-07	< 1e-07	0.1	811.717	353.488	2.29631
1060	4150369	GK	< 1e-07	< 1e-07	0.1	153.945	416.103	0.369968
1061	6480243	GPATCH2	< 1e-07	< 1e-07	0.1	422.393	184.826	2.28536
1062	1470315	PIAS4	< 1e-07	< 1e-07	0.1	286.583	753.461	0.380356
1063	2000367	LOC647436	< 1e-07	< 1e-07	0.1	943.33	395.671	2.38413
1064	3940639	PYCR2	< 1e-07	< 1e-07	0.1	502.279	1136.26	0.442047
1065	6480092	FAM65A	< 1e-07	< 1e-07	0.1	727.931	1706.82	0.426483
1066	610717	C12orf34	< 1e-07	< 1e-07	0.1	293.534	110.738	2.65072
1067	7510129	FAM108B1	< 1e-07	< 1e-07	0.1	361.604	145.046	2.49303
1068	3610259	TUBB	< 1e-07	< 1e-07	0.1	4029.23	9193.26	0.438281
1069	6620577	TTC23	< 1e-07	< 1e-07	0.1	206.164	490.208	0.420565
1070	4260292	SAP130	< 1e-07	< 1e-07	0.1	928.167	426.226	2.17764
1071	6220673	SASH1	< 1e-07	< 1e-07	0.1	491.592	1631.06	0.301395
1072	2970609	TMF1	< 1e-07	< 1e-07	0.1	533.894	243.961	2.18844
1073	6980747	NSL1	< 1e-07	< 1e-07	0.1	489.754	1095.94	0.44688
1074	4610433	ANGPTL4	< 1e-07	< 1e-07	0.1	530.288	190.802	2.77926
1075	5490730	BTF3L4	< 1e-07	< 1e-07	0.1	738.861	1728.71	0.427405
1076	1170717	BTF3L4	< 1e-07	< 1e-07	0.1	446.025	969.23	0.460185
1077	1110300	TMEM154	< 1e-07	< 1e-07	0.1	137.502	299.778	0.458679
1078	1660767	NEFM	< 1e-07	< 1e-07	0.1	639.377	188.434	3.39311
1079	5080682	CTDSP1	< 1e-07	< 1e-07	0.1	425.931	996.674	0.427353
1080	60672	ZNF217	< 1e-07	< 1e-07	0.1	271.985	703.711	0.386501
1081	240152	MGC57346	< 1e-07	< 1e-07	0.1	287.776	613.528	0.469052
1082	1240142	SAMD9	< 1e-07	< 1e-07	0.1	216.525	500.32	0.432773
1083	1850349	HEPH	< 1e-07	< 1e-07	0.1	416.617	189.817	2.19483
1084	3890427	LOC729843	< 1e-07	< 1e-07	0.1	2358.76	1098.16	2.14791
1085	3940440	AKAP13	< 1e-07	< 1e-07	0.1	174.646	399.064	0.43764
1086	6100022	HIST2H2AC	< 1e-07	< 1e-07	0.1	2167.11	835.805	2.59284
1087	3930411	CAMTA1	< 1e-07	< 1e-07	0.1	222.678	102.54	2.17162
1088	450458	PNPLA8	< 1e-07	< 1e-07	0.1	1047.15	425.374	2.46172
1089	2750280	CDK5R1	< 1e-07	< 1e-07	0.1	304.092	130.146	2.33656
1090	7150154	PTBP2	< 1e-07	< 1e-07	0.1	445.53	184.151	2.41938
1091	4070044	RNF38	< 1e-07	< 1e-07	0.1	1553.05	689.975	2.25088
1092	2650564	RARRES3	< 1e-07	< 1e-07	0.1	369.056	169.199	2.1812
1093	2230619	HIST1H4E	< 1e-07	< 1e-07	0.1	281.66	108.407	2.59818
1094	7320291	IQCK	< 1e-07	< 1e-07	0.1	672.445	299.431	2.24574
1095	7100300	ZNF200	< 1e-07	< 1e-07	0.1	483.877	189.801	2.5494
1096	5860411	TUBG1	< 1e-07	< 1e-07	0.1	568.762	1612.83	0.352649
1097	1030333	CCL2	< 1e-07	< 1e-07	0.1	2125.77	5373.64	0.395593
1098	4830315	DUSP10	< 1e-07	< 1e-07	0.1	415.239	183.978	2.257
1099	3140138	C12orf47	< 1e-07	< 1e-07	0.1	1782.32	755.29	2.35978
1100	1980164	DHX32	< 1e-07	< 1e-07	0.1	329.698	765.564	0.43066
1101	4900070	GSTO1	< 1e-07	< 1e-07	0.1	3730.8	8277.34	0.450725
1102	110739	ZNF394	< 1e-07	< 1e-07	0.1	410.874	167.145	2.45819
1103	3370747	YEATS4	< 1e-07	< 1e-07	0.1	223.118	538.424	0.41439
1104	6520598	SLC2A10	< 1e-07	< 1e-07	0.1	1018.4	2212.52	0.460291
1105	6060452	CRSP9	< 1e-07	< 1e-07	0.1	170.43	399.885	0.426197
1106	3940431	ZNF679	< 1e-07	< 1e-07	0.1	260.502	110.79	2.35132
1107	6330072	TBC1D20	< 1e-07	< 1e-07	0.1	652.124	300.052	2.17337
1108	450626	VGLL3	< 1e-07	< 1e-07	0.1	396.01	984.775	0.402133
1109	6290014	CCT4	< 1e-07	< 1e-07	0.1	718.761	324.586	2.21439
1110	6560291	FAR2	< 1e-07	< 1e-07	0.1	239.525	561.061	0.426914
1111	4920274	C2orf30	< 1e-07	< 1e-07	0.1	1104.66	2423.26	0.455856
1112	3130138	BRPF1	< 1e-07	< 1e-07	0.1	420.337	170.912	2.45937
1113	1050563	SERPINC1	< 1e-07	< 1e-07	0.1	255.851	98.2854	2.60314
1114	290086	LZTR1	< 1e-07	< 1e-07	0.1	1028.98	2544.67	0.404365
1115	460164	FTHL11	< 1e-07	< 1e-07	0.1	2748.57	1290.16	2.13042
1116	7560201	NOC3L	< 1e-07	< 1e-07	0.1	330.626	913.836	0.361801
1117	6760673	SC65	< 1e-07	< 1e-07	0.1	720.166	1848.19	0.38966
1118	4860367	ATRIP	< 1e-07	< 1e-07	0.1	149.911	357.961	0.418792
1119	5360619	CDC16	< 1e-07	< 1e-07	0.1	2178.09	4607.94	0.472683
1120	6550053	AKAP8	< 1e-07	< 1e-07	0.1	748.947	351.261	2.13216
1121	6560445	DNAJA3	< 1e-07	< 1e-07	0.1	1138.05	2478.36	0.459194
1122	3420593	LMNB1	< 1e-07	< 1e-07	0.1	129.791	299.533	0.43331
1123	3170669	REV1	< 1e-07	< 1e-07	0.1	166.701	387.593	0.430092
1124	6180414	PTP4A1	< 1e-07	< 1e-07	0.1	1037.39	450.398	2.30328
1125	7550494	SELK	< 1e-07	< 1e-07	0.1	251.029	106.615	2.35454
1126	5570139	QPCT	< 1e-07	< 1e-07	0.1	807.308	369.738	2.18346
1127	6400364	NR4A2	< 1e-07	< 1e-07	0.1	854.959	280.894	3.04371
1128	6550647	COG2	< 1e-07	< 1e-07	0.1	162.325	407.562	0.398284
1129	7150386	TYSND1	< 1e-07	< 1e-07	0.1	251.313	112.737	2.22919
1130	70239	AGGF1	< 1e-07	< 1e-07	0.1	193.466	455.518	0.424717
1131	7000086	KCTD20	< 1e-07	< 1e-07	0.1	429.87	1057.76	0.406398
1132	6480474	PPP1R10	< 1e-07	< 1e-07	0.1	752.628	321.022	2.34447
1133	3310692	SPRY1	< 1e-07	< 1e-07	0.1	427.134	180.832	2.36205
1134	3440487	DCUN1D5	< 1e-07	< 1e-07	0.1	3514.96	1597.8	2.19988
1135	2100524	SPG11	< 1e-07	< 1e-07	0.1	262.213	569.056	0.460786
1136	4220743	JMJD6	< 1e-07	< 1e-07	0.1	313.961	143.763	2.18387
1137	4280482	DRAM	< 1e-07	< 1e-07	0.1	2222.72	4881.08	0.455374
1138	5690398	TNFSF4	< 1e-07	< 1e-07	0.1	246.783	546.543	0.451535
1139	1440612	BZW2	< 1e-07	< 1e-07	0.1	4592.27	2128.54	2.15747
1140	6940196	RNF113A	< 1e-07	< 1e-07	0.1	703.481	312.595	2.25045
1141	2650730	STC1	< 1e-07	< 1e-07	0.1	2124.04	878.717	2.41721
1142	6280053	SMARCAD1	< 1e-07	< 1e-07	0.1	154.522	343.869	0.449365
1143	7150634	APOD	< 1e-07	< 1e-07	0.1	965.774	399.493	2.4175
1144	1940608	RPE	< 1e-07	< 1e-07	0.1	314.595	688.654	0.456826
1145	4180050	TIMELESS	< 1e-07	< 1e-07	0.1	163.707	472.357	0.346575
1146	5820189	KISS1	< 1e-07	< 1e-07	0.1	525.8	1350.13	0.389445
1147	7050719	C1orf162	< 1e-07	< 1e-07	0.1	228.954	102.652	2.23039
1148	160132	BAT1	< 1e-07	< 1e-07	0.1	1793.36	3886.58	0.461424
1149	2360131	C17orf81	< 1e-07	< 1e-07	0.1	149.207	345.841	0.431434
1150	2450246	OSBPL5	< 1e-07	< 1e-07	0.1	398.321	859.47	0.46345
1151	510114	CCNB1IP1	< 1e-07	< 1e-07	0.1	2720.33	1282.99	2.12031
1152	1430008	RNF26	< 1e-07	< 1e-07	0.1	171.548	385.65	0.444829
1153	6270301	RAB33A	< 1e-07	< 1e-07	0.1	394.403	173.031	2.27938
1154	5270110	EIF4A3	< 1e-07	< 1e-07	0.1	8089.15	3492.21	2.31634
1155	5090040	ING1	< 1e-07	< 1e-07	0.1	634.218	269.951	2.34938
1156	6560441	XPC	< 1e-07	< 1e-07	0.1	497.134	1287.2	0.386214
1157	1030102	RGS16	< 1e-07	< 1e-07	0.1	238.991	103.824	2.30188
1158	2000593	RPL17	< 1e-07	< 1e-07	0.1	5237.92	2431.28	2.15439
1159	4760626	MMP12	< 1e-07	< 1e-07	0.1	299.178	131.756	2.2707
1160	3180053	FAM129B	< 1e-07	< 1e-07	0.1	5861.66	12383.1	0.47336
1161	4540689	ANKRD10	< 1e-07	< 1e-07	0.1	504.687	224.03	2.25276
1162	6860594	TAC1	< 1e-07	< 1e-07	0.1	205.913	96.0338	2.14418
1163	7200142	POLR2C	< 1e-07	< 1e-07	0.1	3903.75	1825.57	2.13837
1164	1440121	LOC645968	< 1e-07	< 1e-07	0.1	1192.52	539.456	2.2106
1165	4810615	SLC25A44	< 1e-07	< 1e-07	0.1	1609.01	745.675	2.15779
1166	7210438	ATRIP	< 1e-07	< 1e-07	0.1	128.379	308.547	0.416077
1167	3400278	FXYD5	< 1e-07	< 1e-07	0.1	461.042	207.774	2.21896
1168	6200390	PRIM1	< 1e-07	< 1e-07	0.1	132.489	354.121	0.374135
1169	6770730	GSTO1	< 1e-07	< 1e-07	0.1	3307.76	7153.32	0.462409
1170	6960735	UQCRH	< 1e-07	< 1e-07	0.1	1904.14	770.267	2.47205
1171	630474	ZP3	< 1e-07	< 1e-07	0.1	1067.63	513.8	2.0779
1172	3800110	ORC5L	< 1e-07	< 1e-07	0.1	388.795	850.684	0.457037
1173	1440451	EXOSC2	< 1e-07	< 1e-07	0.1	141.625	329.57	0.429729
1174	2600692	TTC8	< 1e-07	< 1e-07	0.1	201.448	441.317	0.456471
1175	6900053	PPFIBP2	< 1e-07	< 1e-07	0.1	407.348	1022.61	0.398343
1176	5290608	RARRES2	< 1e-07	< 1e-07	0.1	737.745	330.939	2.22925
1177	5720564	CPSF3	< 1e-07	< 1e-07	0.1	827.747	1952.09	0.424032
1178	7000630	DNAJC3	< 1e-07	< 1e-07	0.1	481.771	200.842	2.39876
1179	780678	ADAMTSL4	< 1e-07	< 1e-07	0.1	1273.93	553.267	2.30255
1180	6580603	RFXANK	< 1e-07	< 1e-07	0.1	541.635	1493.11	0.362757
1181	3940528	PPP2CB	< 1e-07	< 1e-07	0.1	3897.68	1862.9	2.09227
1182	4150575	LETMD1	< 1e-07	< 1e-07	0.1	848.547	404.473	2.09791
1183	1190707	PRPF31	< 1e-07	< 1e-07	0.1	748.977	1610.79	0.464974
1184	2350091	LPXN	< 1e-07	< 1e-07	0.1	890.822	2025.06	0.439899
1185	610332	CHN1	< 1e-07	< 1e-07	0.1	1745.94	3836.54	0.455083
1186	7650672	ANGPTL2	< 1e-07	< 1e-07	0.1	858.171	413.911	2.07332
1187	6560020	COMMD2	< 1e-07	< 1e-07	0.1	224.246	649.243	0.345396
1188	5090491	CXorf38	< 1e-07	< 1e-07	0.1	148.429	320.377	0.463294
1189	2570477	BTN2A1	< 1e-07	< 1e-07	0.1	2054.15	980.454	2.0951
1190	6940408	COBRA1	< 1e-07	< 1e-07	0.1	445.422	1054.57	0.422374
1191	3420554	PBK	< 1e-07	< 1e-07	0.1	161.642	499.441	0.323647
1192	1430152	SCML1	< 1e-07	< 1e-07	0.1	639.518	291.682	2.19251
1193	3180088	FAM40A	< 1e-07	< 1e-07	0.1	101.023	221.864	0.455337
1194	7040307	UQCC	< 1e-07	< 1e-07	0.1	2133.95	1008.44	2.1161
1195	1710132	MED4	< 1e-07	< 1e-07	0.1	225.679	477.123	0.473
1196	4920139	CSE1L	< 1e-07	< 1e-07	0.1	365.267	169.712	2.15228
1197	3400762	LOC643870	< 1e-07	< 1e-07	0.1	682.04	324.045	2.10477
1198	5910327	VPS33A	< 1e-07	< 1e-07	0.1	145.425	328.782	0.442314
1199	1570754	CSTF3	< 1e-07	< 1e-07	0.1	2323.61	1036.64	2.24149
1200	50301	EEF1E1	< 1e-07	< 1e-07	0.1	697.138	1574.14	0.442869
1201	6200053	FEZ2	< 1e-07	< 1e-07	0.1	3283.87	7644.6	0.429568
1202	4860546	CTHRC1	< 1e-07	< 1e-07	0.1	2289.04	4757.74	0.481119
1203	6380379	ZNF703	< 1e-07	< 1e-07	0.1	428.76	189.833	2.25861
1204	3450189	HOXA13	< 1e-07	< 1e-07	0.1	110.016	265.01	0.415139
1205	2650433	SFMBT1	< 1e-07	< 1e-07	0.1	351.685	144.503	2.43376
1206	5870220	KCNK2	< 1e-07	< 1e-07	0.1	132.926	305.374	0.435289
1207	3120400	KANK2	< 1e-07	< 1e-07	0.1	392.171	1027.36	0.381729
1208	630259	VPS37D	< 1e-07	< 1e-07	0.1	989.287	447.015	2.2131
1209	650709	RNF34	< 1e-07	< 1e-07	0.1	859.124	1875.27	0.458134
1210	2070195	SNAPC4	< 1e-07	< 1e-07	0.1	245.108	577.092	0.424729
1211	4780129	CENPF	< 1e-07	< 1e-07	0.1	119.194	276.072	0.43175
1212	5670390	SNX33	< 1e-07	< 1e-07	0.1	128.33	294.237	0.436145
1213	2810059	KLF4	< 1e-07	< 1e-07	0.1	1991.69	841.985	2.36547
1214	5810068	SIPA1	< 1e-07	< 1e-07	0.1	258.065	612.321	0.421455
1215	1990022		< 1e-07	< 1e-07	0.1	436.037	921.708	0.473075
1216	20110	CREB3L2	< 1e-07	< 1e-07	0.1	1479.73	3095.48	0.47803
1217	1990291	CRADD	< 1e-07	< 1e-07	0.1	267.181	610.446	0.437682
1218	3870543	PUM1	< 1e-07	< 1e-07	0.1	1076.81	2321.91	0.463761
1219	6760255	MNT	< 1e-07	< 1e-07	0.1	209.095	511.611	0.408699
1220	940386	TXNL1	< 1e-07	< 1e-07	0.1	743.389	327.489	2.26996
1221	3520241	DACT1	< 1e-07	< 1e-07	0.1	681.1	297.228	2.29151
1222	1430110	CPSF2	< 1e-07	< 1e-07	0.1	263.061	612.65	0.429381
1223	1050253	ACOT11	< 1e-07	< 1e-07	0.1	103.706	228.311	0.45423
1224	510100	CBY1	< 1e-07	< 1e-07	0.1	398.173	1124.04	0.354233
1225	130403	RNF19B	< 1e-07	< 1e-07	0.1	373.888	173.925	2.14971
1226	7650458	MFAP1	< 1e-07	< 1e-07	0.1	272.918	614.05	0.444455
1227	3440195	GFM1	< 1e-07	< 1e-07	0.1	388.564	819.924	0.473902
1228	2100136	CIR	< 1e-07	< 1e-07	0.1	366.881	165.985	2.21033
1229	6380673	TUBE1	< 1e-07	< 1e-07	0.1	659.33	291.043	2.26541
1230	3190685	SLC35F2	< 1e-07	< 1e-07	0.1	415.83	175.578	2.36834
1231	4780541	RAE1	< 1e-07	< 1e-07	0.1	366.727	176.31	2.08001
1232	6960379	SFRP1	< 1e-07	< 1e-07	0.1	2497.09	5702.89	0.437863
1233	50114	DNAJC9	< 1e-07	< 1e-07	0.1	900.443	2297.22	0.391971
1234	6220270	BRD7	< 1e-07	< 1e-07	0.1	318.364	786.182	0.40495
1235	6550195	ITFG2	< 1e-07	< 1e-07	0.1	361.858	823.962	0.439169
1236	2190189	NOP5/NOP58	< 1e-07	< 1e-07	0.1	1062.89	380.8	2.79119
1237	990356	TRIM33	< 1e-07	< 1e-07	0.1	573.117	249.131	2.30046
1238	2470161	PLEKHF1	< 1e-07	< 1e-07	0.1	627.494	301.507	2.08119
1239	7000369	CD14	< 1e-07	< 1e-07	0.1	236.948	107.872	2.19657
1240	6270273	KHDRBS3	< 1e-07	< 1e-07	0.1	3673.96	1752.91	2.09592
1241	770746	ETV5	< 1e-07	< 1e-07	0.1	3889.43	1861.44	2.08948
1242	2510133	MRPL55	< 1e-07	< 1e-07	0.1	1195.94	576.206	2.07553
1243	1260154	DOLPP1	< 1e-07	< 1e-07	0.1	193.863	428.69	0.452222
1244	5860152	CD44	< 1e-07	< 1e-07	0.1	10764.2	22572.3	0.476875
1245	5130164	RASA1	< 1e-07	< 1e-07	0.1	801.615	1744.82	0.459425
1246	4490403	IQCB1	< 1e-07	< 1e-07	0.1	564.866	244.516	2.31014
1247	4390273	RASSF7	< 1e-07	< 1e-07	0.1	552.031	1157.34	0.476981
1248	2470719	RTN3	< 1e-07	< 1e-07	0.1	1652.4	750.107	2.20288
1249	4810326	TRNT1	< 1e-07	< 1e-07	0.1	169.926	362.688	0.468519
1250	520243	RBM4	< 1e-07	< 1e-07	0.1	1304.37	607.197	2.14818
1251	360187	RIOK3	1e-07	1.2e-06	0.1	1436.43	605.048	2.37408
1252	2260010	RIT1	1e-07	1.2e-06	0.1	679.326	329.801	2.0598
1253	2070224	BUB1	1e-07	1.2e-06	0.1	139.925	357.828	0.391038
1254	2140653	TPM1	1e-07	1.2e-06	0.1	107.983	235.396	0.458729
1255	2370204	CCNC	1e-07	1.2e-06	0.1	1325.84	633.422	2.09314
1256	4180307	ARNT2	1e-07	1.2e-06	0.1	212.838	538.175	0.395482
1257	360259	TROVE2	1e-07	1.2e-06	0.1	562.633	1242.04	0.452989
1258	5260474	C1R	1e-07	1.2e-06	0.1	4147.97	1665.1	2.49112
1259	6450397	CCNB1IP1	1e-07	1.2e-06	0.1	1256.1	569.536	2.20549
1260	6040156	C6orf52	1e-07	1.2e-06	0.1	262.381	122.528	2.14139
1261	2510066	STRADA	1e-07	1.2e-06	0.1	284.505	662.766	0.429269
1262	2030209	MTF1	1e-07	1.2e-06	0.1	733.668	272.864	2.68876
1263	1500201	HNRPC	1e-07	1.2e-06	0.1	1288.09	538.073	2.3939
1264	1340681	FGFR1OP2	1e-07	1.2e-06	0.1	355.876	166.771	2.13391
1265	650315	ETF1	1e-07	1.2e-06	0.1	653.429	297.592	2.19573
1266	6660671	KCNK1	1e-07	1.2e-06	0.1	443.652	191	2.32278
1267	1940164	LSM5	1e-07	1.2e-06	0.1	1169.85	2562.24	0.456576
1268	3360400	SMC2	1e-07	1.2e-06	0.1	135.689	349.357	0.388397
1269	7040161	HELLS	1e-07	1.2e-06	0.1	91.7164	221.312	0.414421
1270	5310324	PTCD2	1e-07	1.2e-06	0.1	158.612	350.673	0.452308
1271	110064	RNASEL	1e-07	1.2e-06	0.1	174.669	377.949	0.462151
1272	3360059	CASP2	1e-07	1.2e-06	0.1	1052.38	2247.14	0.468318
1273	2760202	AP3M1	1e-07	1.2e-06	0.1	466.743	993.589	0.469754
1274	450253	PTK2	1e-07	1.2e-06	0.1	2183.89	4570.31	0.477843
1275	6330341	PARP8	1e-07	1.2e-06	0.1	646.365	289.259	2.23455
1276	6330170	CHKA	1e-07	1.2e-06	0.1	376.474	121.63	3.09524
1277	1010735	DDX24	1e-07	1.2e-06	0.1	2821.92	1365.17	2.06708
1278	6620390		1e-07	1.2e-06	0.1	168.967	391.693	0.431377
1279	510544	RAD51C	1e-07	1.2e-06	0.1	233.08	474.033	0.491696
1280	3940343	TAF1B	1e-07	1.2e-06	0.1	168.398	358.903	0.469203
1281	7000411	GTPBP8	1e-07	1.2e-06	0.1	145.427	312.505	0.465361
1282	770037	ZNF280C	1e-07	1.2e-06	0.1	487.679	233.171	2.09151
1283	6940008	PNLDC1	1e-07	1.2e-06	0.1	246.821	90.8068	2.71809
1284	2030132	LOC653506	1e-07	1.2e-06	0.1	2064.33	4613.35	0.447468
1285	6760026	LRRC57	1e-07	1.2e-06	0.1	111.304	254.478	0.437383
1286	2970397	ZNF296	1e-07	1.2e-06	0.1	277.075	131.35	2.10944
1287	1980768	SIAH2	1e-07	1.2e-06	0.1	699.25	302.171	2.31409
1288	240669	SSTR1	1e-07	1.2e-06	0.1	180.076	424.212	0.424495
1289	4280010	LIMS2	1e-07	1.2e-06	0.1	1441.15	681.709	2.11402
1290	630341	FOXA3	1e-07	1.2e-06	0.1	236.777	108.112	2.19011
1291	7040280	CLINT1	1e-07	1.2e-06	0.1	3793.91	1754.48	2.16241
1292	4040576	IL6	1e-07	1.2e-06	0.1	718.535	1501.6	0.478513
1293	5900725	PHLDA1	1e-07	1.2e-06	0.1	2816.54	1358.06	2.07395
1294	1500603	KIAA0020	1e-07	1.2e-06	0.1	640.734	1382.39	0.463498
1295	4220307	LOC647673	1e-07	1.2e-06	0.1	4162.63	1988.46	2.0934
1296	6650164	LOC400027	1e-07	1.2e-06	0.1	213.822	471.555	0.45344
1297	6840348	BRI3BP	1e-07	1.2e-06	0.1	174.585	407.309	0.428629
1298	1030241	ADK	1e-07	1.2e-06	0.1	896.456	1926.43	0.465345
1299	6370376	ZNF443	1e-07	1.2e-06	0.1	417.263	174.816	2.38687
1300	4780411	LRP8	1e-07	1.2e-06	0.1	146.923	310.333	0.473436
1301	4250577	HSPD1	1e-07	1.2e-06	0.1	285.294	126.828	2.24945
1302	6100446		1e-07	1.2e-06	0.1	193.225	420.347	0.45968
1303	5390435	KCNG3	1e-07	1.2e-06	0.1	209.712	93.0142	2.25462
1304	7380327	FBXO31	1e-07	1.2e-06	0.1	299.711	630.223	0.475563
1305	6200128	ROD1	1e-07	1.2e-06	0.1	1147.85	2336.3	0.491312
1306	50348	ALS2CR4	1e-07	1.2e-06	0.1	1406.77	2938.53	0.478733
1307	5080259	KCNS3	1e-07	1.2e-06	0.1	264.274	123.922	2.13259
1308	7200601	MUC1	1e-07	1.2e-06	0.1	792.612	331.97	2.3876
1309	4200008	ATG2A	1e-07	1.2e-06	0.1	135.208	295.061	0.458238
1310	7320152		1e-07	1.2e-06	0.1	162.277	412.283	0.393607
1311	4920730	FAM91A1	1e-07	1.2e-06	0.1	329.282	157.236	2.09419
1312	7550138	SYPL2	1e-07	1.2e-06	0.1	798.498	323.659	2.4671
1313	2190452	PIM3	1e-07	1.2e-06	0.1	460.523	187.549	2.45548
1314	2340129	DCLK2	1e-07	1.2e-06	0.1	153.617	347.277	0.442348
1315	4850296	HCFC1	1e-07	1.2e-06	0.1	1137.46	2444.17	0.465377
1316	3460242	HEATR1	1e-07	1.2e-06	0.1	472.745	1042.34	0.453543
1317	1710386	C8orf58	1e-07	1.2e-06	0.1	125.027	273.03	0.457925
1318	1300519	ZNF597	1e-07	1.2e-06	0.1	304.898	124.753	2.44402
1319	3930215	PLEKHA9	1e-07	1.2e-06	0.1	441.289	182.7	2.41537
1320	6370341	SPOP	1e-07	1.2e-06	0.1	1461.89	3744.65	0.390394
1321	5910128	VAMP8	1e-07	1.2e-06	0.1	296.499	133.45	2.22181
1322	270593	GPER	1e-07	1.2e-06	0.1	1029.82	463.958	2.21965
1323	1070762	PSRC1	1e-07	1.2e-06	0.1	147.766	322.576	0.458083
1324	3360066	ANGPT1	1e-07	1.2e-06	0.1	400.879	872.815	0.459294
1325	4180100	APPL2	1e-07	1.2e-06	0.1	1342.92	2745.23	0.489185
1326	4060176	KIF11	1e-07	1.2e-06	0.1	171.126	379.68	0.450711
1327	1990433	RMI1	1e-07	1.2e-06	0.1	279.774	786.512	0.355715
1328	1500131	CPEB4	1e-07	1.2e-06	0.1	347.915	125.724	2.76731
1329	2340040	SNUPN	1e-07	1.2e-06	0.1	245.619	550.94	0.445819
1330	2630719	RANBP3	1e-07	1.2e-06	0.1	313.388	757.207	0.413874
1331	2680278	FAM111A	1e-07	1.2e-06	0.1	597.091	1533.04	0.389483
1332	7650220	LOC643007	1e-07	1.2e-06	0.1	1116.23	483.062	2.31073
1333	7650026	MUC1	1e-07	1.2e-06	0.1	1712.49	800.77	2.13856
1334	2640735	BHLHB2	1e-07	1.2e-06	0.1	2267.67	892.992	2.53941
1335	2650114	ITGB5	1e-07	1.2e-06	0.1	5944.88	12413.8	0.478894
1336	1340538	SGSH	1e-07	1.2e-06	0.1	696.345	1469.32	0.473924
1337	3830040	HERC4	1e-07	1.2e-06	0.1	768.507	1804.25	0.425942
1338	5050082	PUF60	1e-07	1.2e-06	0.1	1963.45	4023.54	0.487992
1339	50446	INHBB	1e-07	1.2e-06	0.1	740.925	332.878	2.22581
1340	430333	NLRX1	1e-07	1.2e-06	0.1	303.373	634.968	0.477776
1341	3610348	FAM10A4	1e-07	1.2e-06	0.1	445.837	198.132	2.25021
1342	1780152	SFMBT1	1e-07	1.2e-06	0.1	294.942	135.449	2.17752
1343	1010048	CXXC5	1e-07	1.2e-06	0.1	1753.02	3612.71	0.485236
1344	1240253	CTTNBP2NL	1e-07	1.2e-06	0.1	111.903	263.531	0.424628
1345	6220441	CISD1	1e-07	1.2e-06	0.1	2265.9	4677	0.484477
1346	3930707	LOC346950	1e-07	1.2e-06	0.1	1312.3	613.836	2.13786
1347	1230754	POR	1e-07	1.2e-06	0.1	581.565	282.443	2.05905
1348	6580270	LOC646723	1e-07	1.2e-06	0.1	5341.08	11393.6	0.46878
1349	6770202	IPO11	1e-07	1.2e-06	0.1	476.6	1027.39	0.463892
1350	770047	PI4K2B	1e-07	1.2e-06	0.1	322.614	687.696	0.469122
1351	520358	IKBKG	1e-07	1.2e-06	0.1	623.766	1282.95	0.486198
1352	7210605	BTG3	1e-07	1.2e-06	0.1	1432.79	669.082	2.14142
1353	5810142	CITED4	1e-07	1.2e-06	0.1	396.298	174.086	2.27645
1354	6840706	ANAPC10	1e-07	1.2e-06	0.1	347.422	812.889	0.427391
1355	1260241	EIF4EBP2	1e-07	1.2e-06	0.1	809.562	375.185	2.15777
1356	4290273	NUDCD3	1e-07	1.2e-06	0.1	343.736	696.904	0.493233
1357	4010753	RHOG	1e-07	1.2e-06	0.1	930.882	2103.93	0.442449
1358	1980288	CTSH	1e-07	1.2e-06	0.1	1267.46	625.96	2.02482
1359	4900068	KIAA1715	1e-07	1.2e-06	0.1	333.029	737.473	0.451581
1360	1820037	SLC11A2	1e-07	1.2e-06	0.1	378.863	914.819	0.41414
1361	540056	PCCB	1e-07	1.2e-06	0.1	901.388	1839.25	0.490084
1362	6770600	EAF2	1e-07	1.2e-06	0.1	248.92	116.088	2.14423
1363	10286	ADAMTSL4	1e-07	1.2e-06	0.1	1208.26	591.217	2.04367
1364	1580397	ISCA2	1e-07	1.2e-06	0.1	119.873	241.473	0.496425
1365	4570600	GPR89B	1e-07	1.2e-06	0.1	646.36	282.107	2.29119
1366	7400743	KIAA1618	1e-07	1.2e-06	0.1	191.794	398.116	0.481754
1367	3850278	LOC641849	1e-07	1.2e-06	0.1	616.166	273.039	2.2567
1368	3460292	WDR7	1e-07	1.2e-06	0.1	136.541	320.499	0.426027
1369	1570129	TRAFD1	1e-07	1.2e-06	0.1	568.486	264.692	2.14773
1370	3610475	LOC402057	1e-07	1.2e-06	0.1	438.085	202.248	2.16608
1371	5810414	CYB5A	1e-07	1.2e-06	0.1	1809.45	884.382	2.04601
1372	5220452	SYNC1	1e-07	1.2e-06	0.1	467.751	1306.43	0.358039
1373	3370246	IHPK2	1e-07	1.2e-06	0.1	618.931	257.871	2.40016
1374	4780414	RPL32	1e-07	1.2e-06	0.1	715.168	334.966	2.13505
1375	1260475	UFD1L	1e-07	1.2e-06	0.1	303.56	140.514	2.16035
1376	150129	C1orf135	1e-07	1.2e-06	0.1	110.528	278.77	0.396483
1377	1240379	ALDH1B1	1e-07	1.2e-06	0.1	141.916	374.472	0.378977
1378	3800309	EIF4H	1e-07	1.2e-06	0.1	2347.18	4891.39	0.47986
1379	3390730	DOLK	1e-07	1.2e-06	0.1	277.843	556.708	0.499082
1380	6380008	EPC1	1e-07	1.2e-06	0.1	433.329	200.547	2.16074
1381	5090440	CDKN2AIP	1e-07	1.2e-06	0.1	721.104	347.466	2.07532
1382	6280446	LOC642989	1e-07	1.2e-06	0.1	5346.6	2429.73	2.20049
1383	6280332	CXCL16	1e-07	1.2e-06	0.1	400.965	185.006	2.16731
1384	4670100	C7orf30	1e-07	1.2e-06	0.1	1924.35	4079.18	0.471749
1385	4050370	METTL5	1e-07	1.2e-06	0.1	854.262	1876.63	0.45521
1386	5570376	FAM50B	1e-07	1.2e-06	0.1	164.67	357.462	0.460666
1387	5290427	GLI2	1e-07	1.2e-06	0.1	109.332	253.313	0.431609
1388	1260195	DLD	1e-07	1.2e-06	0.1	292.61	643.588	0.454653
1389	2190689	OSBPL5	1e-07	1.2e-06	0.1	433.868	919.445	0.47188
1390	4250204	SLC25A3	1e-07	1.2e-06	0.1	403.952	167.872	2.40631
1391	3930703	WDR4	1e-07	1.2e-06	0.1	455.886	1111.64	0.410104
1392	3130598	RRP7A	1e-07	1.2e-06	0.1	664.751	1381.05	0.481337
1393	1070184	PRKD1	1e-07	1.2e-06	0.1	490.315	1030.56	0.475773
1394	270736	TRABD	1e-07	1.2e-06	0.1	962.042	1969.91	0.488369
1395	1740746	PLK2	1e-07	1.2e-06	0.1	357.664	117.825	3.03556
1396	1940082		1e-07	1.2e-06	0.1	200.65	498.79	0.402274
1397	4280678	SEPP1	1e-07	1.2e-06	0.1	406.623	172.028	2.3637
1398	3830762	TMEM119	1e-07	1.2e-06	0.1	4080.88	2033.96	2.00638
1399	1940605	WDR8	1e-07	1.2e-06	0.1	211.727	464.21	0.456103
1400	7200270	CHEK1	1e-07	1.2e-06	0.1	284.506	580.72	0.48992
1401	520747		1e-07	1.2e-06	0.1	249.649	502.707	0.496609
1402	7380110	CDK4	1e-07	1.2e-06	0.1	1157.07	2644.59	0.437523
1403	2690400	MRPS17	1e-07	1.2e-06	0.1	876.165	1759.6	0.497934
1404	6450687	EXOSC7	1e-07	1.2e-06	0.1	398.861	969.751	0.411302
1405	240390	GEMIN6	1e-07	1.2e-06	0.1	243.168	669.209	0.363367
1406	2510707	TRMT12	1e-07	1.2e-06	0.1	149.615	359.547	0.416123
1407	6380681	C19orf12	1e-07	1.2e-06	0.1	640.216	1312.49	0.487787
1408	1740504	MCRS1	1e-07	1.2e-06	0.1	897.943	1960.75	0.45796
1409	6110739	RDH14	1e-07	1.2e-06	0.1	888.51	1893.43	0.469259
1410	20358	MEIS2	1e-07	1.2e-06	0.1	487.193	1008.54	0.483066
1411	6280040	YWHAG	1e-07	1.2e-06	0.1	773.067	383.951	2.01345
1412	6480315	GPBP1	1e-07	1.2e-06	0.1	1478.18	661.553	2.23441
1413	7510709	CEP55	1e-07	1.2e-06	0.1	197.274	493.191	0.399996
1414	5820528	TSEN34	1e-07	1.2e-06	0.1	1292.01	2661.35	0.485474
1415	4070014	APBA3	1e-07	1.2e-06	0.1	204.278	461.977	0.442182
1416	2030681	RPL32	1e-07	1.2e-06	0.1	374.9	176.334	2.12608
1417	5890047	ZDHHC17	1e-07	1.2e-06	0.1	186.025	388.319	0.479051
1418	6110575	FAIM	1e-07	1.2e-06	0.1	151.438	428.778	0.353185
1419	4230368	ECE2	1e-07	1.2e-06	0.1	459.674	190.077	2.41836
1420	4220520	TMEM57	1e-07	1.2e-06	0.1	481.292	211.362	2.27709
1421	6200168	PIM2	1e-07	1.2e-06	0.1	502.111	213.236	2.35472
1422	2760735	SYNM	1e-07	1.2e-06	0.1	433.866	206.552	2.10052
1423	6270411	GAS1	1e-07	1.2e-06	0.1	477.552	1107.01	0.43139
1424	6380709	SETD4	1e-07	1.2e-06	0.1	114.58	297.989	0.38451
1425	5080066	BRWD1	1e-07	1.2e-06	0.1	287.57	593.54	0.4845
1426	6900079	PCNA	1e-07	1.2e-06	0.1	1538.09	3509.52	0.438262
1427	3870497	FUT8	1e-07	1.2e-06	0.1	292.86	591.138	0.495417
1428	60273	KCNJ8	1e-07	1.2e-06	0.1	189.461	380.499	0.497928
1429	4210630	ARHGAP23	1e-07	1.2e-06	0.1	1697	3598.69	0.471559
1430	6650278	KCNK6	1e-07	1.2e-06	0.1	390.429	785.807	0.49685
1431	4010021	FN3KRP	1e-07	1.2e-06	0.1	698.006	1564.37	0.44619
1432	6060414	EIF1B	1e-07	1.2e-06	0.1	2998.45	1477.04	2.03004
1433	2710431	GTPBP3	1e-07	1.2e-06	0.1	311.077	688.587	0.451761
1434	380689	TSC22D1	1e-07	1.2e-06	0.1	772.708	320.674	2.40964
1435	2490564		1e-07	1.2e-06	0.1	196.061	498.021	0.39368
1436	5220347	BCKDK	1e-07	1.2e-06	0.1	1805.42	3613.76	0.499595
1437	4260044	SQSTM1	1e-07	1.2e-06	0.1	6859	3057.54	2.24331
1438	1440241	CALHM2	1e-07	1.2e-06	0.1	157.487	333.899	0.471659
1439	2750544	FLJ20323	1e-07	1.2e-06	0.1	201.787	422.512	0.477587
1440	7550343	PRDX6	1e-07	1.2e-06	0.1	15513.8	31931.6	0.485843
1441	6370215	RSBN1	1e-07	1.2e-06	0.1	832.803	352.684	2.36133
1442	5080546	MRPL12	1e-07	1.2e-06	0.1	623.237	1465.43	0.425293
1443	4280692	PARP1	1e-07	1.2e-06	0.1	1027.96	2068.54	0.496948
1444	3870220	POLG	1e-07	1.2e-06	0.1	108.247	234.157	0.462286
1445	5080603	ACTL6A	1e-07	1.2e-06	0.1	1035	2259.45	0.458076
1446	3440201	TTC5	1e-07	1.2e-06	0.1	157.198	329.151	0.477587
1447	5700523	C2orf29	1e-07	1.2e-06	0.1	1343.87	2720.96	0.493896
1448	4290132	MGC3196	1e-07	1.2e-06	0.1	123.552	282.132	0.437924
1449	6590446	LOC651149	1e-07	1.2e-06	0.1	5353.68	2661.3	2.01168
1450	2350630	CENPQ	1e-07	1.2e-06	0.1	119.936	280.158	0.4281
1451	5820240	FNTB	1e-07	1.2e-06	0.1	330.018	695.158	0.474739
1452	7150674	dJ341D10.1	1e-07	1.2e-06	0.1	724.986	340.335	2.13021
1453	110240	C12orf29	1e-07	1.2e-06	0.1	642.854	321.216	2.00131
1454	7150563	ENC1	1e-07	1.2e-06	0.1	1538.93	744.459	2.06717
1455	7040707	KIF1B	1e-07	1.2e-06	0.1	214.091	475.388	0.45035
1456	1690487	LOC285382	1e-07	1.2e-06	0.1	300.382	624.886	0.480698
1457	2340241	IMPA2	1e-07	1.2e-06	0.1	230.167	611.951	0.376119
1458	730639	C17orf51	1e-07	1.2e-06	0.1	227.427	108.707	2.09212
1459	3850187	FBXL2	1e-07	1.2e-06	0.1	119.874	254.763	0.470529
1460	3370201	LOC648343	1e-07	1.2e-06	0.1	1205.47	504.185	2.39094
1461	5860253	AHI1	1e-07	1.2e-06	0.1	681.895	333.047	2.04744
1462	730100	UFD1L	1e-07	1.2e-06	0.1	400.617	175.1	2.28794
1463	1090577	VPS25	1e-07	1.2e-06	0.1	433.939	938.24	0.462503
1464	3180132	LOC285636	1e-07	1.2e-06	0.1	377.698	1023.56	0.369006
1465	60092	PUS1	1e-07	1.2e-06	0.1	622.037	1299.73	0.478591
1466	6840328	SMAD3	1e-07	1.2e-06	0.1	323.956	690.179	0.469379
1467	6250093	GOLGA3	1e-07	1.2e-06	0.1	1472.97	3367.34	0.437429
1468	7510707	E2F6	1e-07	1.2e-06	0.1	937.713	464.204	2.02004
1469	620019	RPS26P10	1e-07	1.2e-06	0.1	1053.48	486.336	2.16616
1470	2760309		1e-07	1.2e-06	0.1	756.666	1586.44	0.476958
1471	6980445		1e-07	1.2e-06	0.1	164.061	382.337	0.4291
1472	110743	OSBPL1A	1e-07	1.2e-06	0.1	378.28	184.267	2.05289
1473	1450131	EXOSC3	1e-07	1.2e-06	0.1	440.85	891.477	0.494516
1474	3990440	PITX2	1e-07	1.2e-06	0.1	289.695	130.083	2.227
1475	5720192	FANCE	1e-07	1.2e-06	0.1	236.835	519.716	0.455699
1476	3890326	SOD2	1e-07	1.2e-06	0.1	1620.44	759.491	2.13358
1477	1940288	TYSND1	1e-07	1.2e-06	0.1	779.821	381.826	2.04235
1478	6270450	GCN1L1	1e-07	1.2e-06	0.1	404.743	958.664	0.422194
1479	1260025	CDK5RAP1	1e-07	1.2e-06	0.1	268.909	551.825	0.487309
1480	1500113	SST	1e-07	1.2e-06	0.1	104.961	239.098	0.438989
1481	2810601	LEF1	1e-07	1.2e-06	0.1	253.263	125.569	2.01692
1482	5220315	MBNL1	1e-07	1.2e-06	0.1	869.03	1821.09	0.477202
1483	6510553	ARID3A	1e-07	1.2e-06	0.1	297.158	744.492	0.399142
1484	5310068	NUP93	1e-07	1.2e-06	0.1	482.086	1098.26	0.438953
1485	3310228	C11orf67	1e-07	1.2e-06	0.1	2280.8	1056.68	2.15847
1486	2900441	ZBTB4	1e-07	1.2e-06	0.1	1049.74	2101.45	0.499529
1487	4280524	LEPREL1	1e-07	1.2e-06	0.1	1041.02	2220.73	0.468771
1488	7150189	PHF17	1e-07	1.2e-06	0.1	121.704	254.422	0.478353
1489	5890241	ZFYVE26	1e-07	1.2e-06	0.1	204.818	411.258	0.498028
1490	2030687	C3orf59	1e-07	1.2e-06	0.1	295.298	612.23	0.482332
1491	2600463	TNFRSF10B	1e-07	1.2e-06	0.1	3233.87	1426.79	2.26653
1492	4230068	RNASEH2A	1e-07	1.2e-06	0.1	138.659	332.399	0.417148
1493	2760451	KPNA3	1e-07	1.2e-06	0.1	401.939	963.183	0.417303
1494	2760519	CKLF	1e-07	1.2e-06	0.1	587.378	1467.53	0.400249
1495	4610047	RANBP1	1e-07	1.2e-06	0.1	1651.08	4072.89	0.405384
1496	2900373	NPAS1	1e-07	1.2e-06	0.1	487.342	1004.91	0.484961
1497	2630369	CHST14	1e-07	1.2e-06	0.1	181.653	435.146	0.417452
1498	3830092	RGS10	1e-07	1.2e-06	0.1	2634.2	1310.2	2.01053
1499	2640224	VEGFA	1e-07	1.2e-06	0.1	553.368	271.044	2.04162
1500	6760719	EMILIN1	1e-07	1.2e-06	0.1	408.482	930.27	0.4391
1501	2450241	RNF148	1e-07	1.2e-06	0.1	223.481	108.588	2.05806
1502	6370201	C14orf43	1e-07	1.2e-06	0.1	173.791	417.684	0.416083
1503	3850722	TMEM185B	1e-07	1.2e-06	0.1	303.515	744.081	0.407907
1504	270703	TMEFF2	1e-07	1.2e-06	0.1	252.05	103.537	2.43439
1505	380750	LOC644422	1e-07	1.2e-06	0.1	567.221	1255.24	0.451881
1506	4570598	KEAP1	1e-07	1.2e-06	0.1	358.969	901.863	0.398031
1507	7320598	CPLX4	1e-07	1.2e-06	0.1	215.261	105.233	2.04557
1508	6580612	NUP43	1e-07	1.2e-06	0.1	807.948	1754.31	0.460549
1509	610451	HIST2H2AA3	1e-07	1.2e-06	0.1	4290.99	1559.38	2.75173
1510	3170689	NKTR	1e-07	1.2e-06	0.1	226.025	529.752	0.426661
1511	870167	PDS5B	1e-07	1.2e-06	0.1	114.809	244.968	0.468668
1512	1050195	KIF20A	1e-07	1.2e-06	0.1	166.866	436.189	0.382554
1513	2970563	RPRC1	2e-07	2.2e-06	0.1	2767.51	5729.05	0.483067
1514	6100187	LOC643047	2e-07	2.2e-06	0.1	236.253	109.675	2.15411
1515	6510600	MLLT10	2e-07	2.2e-06	0.1	150.606	336.396	0.447705
1516	5290482	IFP38	2e-07	2.2e-06	0.1	2912.39	1298.65	2.24262
1517	620360	CAV2	2e-07	2.2e-06	0.1	1393.71	3097.82	0.4499
1518	1240593	CFLAR	2e-07	2.2e-06	0.1	200.441	442.71	0.45276
1519	110561	NDST2	2e-07	2.2e-06	0.1	211.583	435.223	0.486149
1520	1980403	ZNF395	2e-07	2.2e-06	0.1	390.405	836.002	0.46699
1521	5820521	PTBP2	2e-07	2.2e-06	0.1	458.678	201.199	2.27973
1522	3870619	AMD1	2e-07	2.2e-06	0.1	1376.04	593.138	2.31993
1523	3360768	YAP1	2e-07	2.2e-06	0.1	1760.36	3728.75	0.472106
1524	1820722	APBB1IP	2e-07	2.2e-06	0.1	283.707	612.674	0.463064
1525	830682	LOC387934	2e-07	2.2e-06	0.1	469.268	232.413	2.01912
1526	510041	SEC22C	2e-07	2.2e-06	0.1	924.849	1976.17	0.468
1527	730440	RELB	2e-07	2.2e-06	0.1	315.302	157.542	2.00139
1528	6400048	PHF3	2e-07	2.2e-06	0.1	556.717	1168.47	0.476451
1529	7160196	C4orf41	2e-07	2.2e-06	0.1	316.53	638.074	0.496071
1530	7570139	FBXO38	2e-07	2.2e-06	0.1	277.504	571.841	0.485282
1531	2120524	IGFBP5	2e-07	2.2e-06	0.1	19342.3	39160.4	0.493925
1532	3780762	FAM44B	2e-07	2.2e-06	0.1	767.555	1543.3	0.497346
1533	5260537	YEATS2	2e-07	2.2e-06	0.1	333.023	707.849	0.470472
1534	2690528	SHMT1	2e-07	2.2e-06	0.1	116.687	245.973	0.474391
1535	1240477	RTN4IP1	2e-07	2.2e-06	0.1	113.716	290.023	0.392092
1536	580026	FAM86A	2e-07	2.2e-06	0.1	191.702	476.421	0.40238
1537	4730538	SLC25A25	2e-07	2.2e-06	0.1	386.708	161.777	2.39037
1538	6960689	LOC401093	2e-07	2.2e-06	0.1	145.247	293.762	0.494439
1539	5700722	TSSC1	2e-07	2.2e-06	0.1	299.622	699.802	0.428153
1540	5340064	CPZ	2e-07	2.2e-06	0.1	641.828	303.771	2.11287
1541	5890113	FLCN	2e-07	2.2e-06	0.1	228.412	114.131	2.00132
1542	4200497	CLK2	2e-07	2.2e-06	0.1	106.618	238.469	0.447093
1543	6660201	GCDH	2e-07	2.2e-06	0.1	177.682	372.35	0.477191
1544	2850438	RBM12	2e-07	2.2e-06	0.1	272.575	561.554	0.485395
1545	2070669	CDC42EP3	2e-07	2.2e-06	0.1	175.161	361.852	0.484069
1546	70181	NAP1L4	2e-07	2.2e-06	0.1	1888.75	3891.38	0.485367
1547	6370594	PPAPDC2	2e-07	2.2e-06	0.1	109.51	246.36	0.444509
1548	4760113	LOC400506	2e-07	2.2e-06	0.1	115.615	234.945	0.492095
1549	7150397	PCDH19	2e-07	2.2e-06	0.1	217.21	104.36	2.08137
1550	1740364	STAMBP	2e-07	2.2e-06	0.1	499.296	1073.73	0.465011
1551	2450634	POLR3H	2e-07	2.2e-06	0.1	355.178	759.44	0.467683
1552	4280725	RNF14	2e-07	2.2e-06	0.1	657.81	1338.76	0.491359
1553	2360167	FARSA	2e-07	2.2e-06	0.1	154.85	340.88	0.454266
1554	110148	BCL10	2e-07	2.2e-06	0.1	554.359	273.289	2.02847
1555	620202	OSGIN1	2e-07	2.2e-06	0.1	301.908	112.091	2.69342
1556	3400709		2e-07	2.2e-06	0.1	312.918	716.21	0.436908
1557	3170491	PDIA5	2e-07	2.2e-06	0.1	377.059	814.637	0.462855
1558	3290427	HOXA10	2e-07	2.2e-06	0.1	202.868	410.227	0.494527
1559	1820592	HIST2H2AA3	2e-07	2.2e-06	0.1	3354.68	1490.77	2.2503
1560	5310332	LCMT2	2e-07	2.2e-06	0.1	202.243	422.005	0.479243
1561	1660215	ATP6V0A1	2e-07	2.2e-06	0.1	2095.07	972.889	2.15345
1562	6020706	PLGLB1	2e-07	2.2e-06	0.1	232.989	111.685	2.08612
1563	7380608	HMGCL	2e-07	2.2e-06	0.1	207.933	421.119	0.493762
1564	6220142	EXOSC9	2e-07	2.2e-06	0.1	257.516	527.159	0.488497
1565	6860743	C14orf138	2e-07	2.2e-06	0.1	712.219	335.294	2.12416
1566	940288	BAZ1A	2e-07	2.2e-06	0.1	1261.78	580.128	2.175
1567	4220327	MRPL38	2e-07	2.2e-06	0.1	227.868	465.067	0.489968
1568	360367	PCDH7	2e-07	2.2e-06	0.1	491.765	202.102	2.43326
1569	1010692	NR2F6	2e-07	2.2e-06	0.1	425.24	979.524	0.434129
1570	4830458	GMPPB	2e-07	2.2e-06	0.1	283.48	814.468	0.348056
1571	730010	ADPRHL2	2e-07	2.2e-06	0.1	173.151	387.224	0.447161
1572	20170	ZNF385A	2e-07	2.2e-06	0.1	203.434	101.455	2.00517
1573	5570152	ATP1A1	2e-07	2.2e-06	0.1	1615.43	715.878	2.25658
1574	4070215	RGS12	2e-07	2.2e-06	0.1	157.227	343.855	0.457248
1575	6450669	ANLN	2e-07	2.2e-06	0.1	207.833	478.928	0.433954
1576	4590370	SLC2A1	2e-07	2.2e-06	0.1	1677.59	3412.84	0.491552
1577	1340259	ZNF330	2e-07	2.2e-06	0.1	1972.62	905.401	2.17872
1578	2570291	IFNGR2	2e-07	2.2e-06	0.1	2141.13	4796.78	0.446369
1579	2750719	DDX21	2e-07	2.2e-06	0.1	2996.14	1480.82	2.0233
1580	2710541	RNF4	2e-07	2.2e-06	0.1	671.557	326.526	2.05667
1581	5420452	OSR2	2e-07	2.2e-06	0.1	1590.77	783.196	2.03113
1582	4760520	MRPL15	2e-07	2.2e-06	0.1	946.15	2012.34	0.470175
1583	6040324	SDCBP	2e-07	2.2e-06	0.1	2864.48	1364.87	2.09872
1584	6650639	VAMP1	2e-07	2.2e-06	0.1	436.541	208.094	2.09781
1585	1010053	CCNK	2e-07	2.2e-06	0.1	2962.56	1416.58	2.09134
1586	3850600	PCBD1	2e-07	2.2e-06	0.1	765.497	375.701	2.03751
1587	1990053	POLRMT	2e-07	2.2e-06	0.1	164.173	413.935	0.396615
1588	5910138	NGDN	2e-07	2.2e-06	0.1	2214.99	1073.32	2.06368
1589	3870400	TSPYL3	2e-07	2.2e-06	0.1	164.815	360.122	0.457664
1590	3170239	CSK	2e-07	2.2e-06	0.1	1058.25	2343.11	0.451642
1591	3440037	PALM	2e-07	2.2e-06	0.1	412.698	202.163	2.04142
1592	3190411	STARD13	2e-07	2.2e-06	0.1	136.041	319.847	0.425331
1593	50193	ZNF318	2e-07	2.2e-06	0.1	150.669	313.755	0.480212
1594	4290349	LOC643949	2e-07	2.2e-06	0.1	3138.12	1490.55	2.10535
1595	3520092	BAX	2e-07	2.2e-06	0.1	981.972	2026.49	0.484568
1596	1090370	UCHL5IP	2e-07	2.2e-06	0.1	245.869	612.189	0.401623
1597	1780068	MAPK7	2e-07	2.2e-06	0.1	150.974	325.738	0.463484
1598	2650204	ALDH1B1	2e-07	2.2e-06	0.1	115.287	254.921	0.452245
1599	4860563	NDUFAB1	2e-07	2.2e-06	0.1	2556.21	5219.21	0.48977
1600	2030730	UBE2I	2e-07	2.2e-06	0.1	2767.54	5553.81	0.498313
1601	430630	HSPA9	2e-07	2.2e-06	0.1	4026.94	1898.91	2.12065
1602	5700477	C5orf23	2e-07	2.2e-06	0.1	120.555	289.748	0.416069
1603	6350358	ZMYM1	2e-07	2.2e-06	0.1	166.933	336.45	0.496161
1604	3780609	RAD51	2e-07	2.2e-06	0.1	97.9781	213.927	0.457999
1605	620497	ZNF473	2e-07	2.2e-06	0.1	332.637	153.931	2.16095
1606	6290356	SERPINF1	2e-07	2.2e-06	0.1	701.855	300.422	2.33623
1607	610475	TP53BP1	2e-07	2.2e-06	0.1	236.613	500.088	0.473142
1608	5720598	MYO1B	2e-07	2.2e-06	0.1	1443.96	3154.07	0.457807
1609	3890008	CYCSL1	2e-07	2.2e-06	0.1	3234.02	1595.41	2.02707
1610	5960343	PRIC285	2e-07	2.2e-06	0.1	251.796	503.658	0.499934
1611	1240414	GLRX2	2e-07	2.2e-06	0.1	195.561	419.695	0.46596
1612	1570066	TMEM39B	2e-07	2.2e-06	0.1	262.498	591.685	0.443646
1613	3440068	GREM2	2e-07	2.2e-06	0.1	117.177	246.174	0.475992
1614	1050309	HLX	2e-07	2.2e-06	0.1	426.746	197.233	2.16366
1615	1340100	LOC440928	3e-07	3.2e-06	0.1	585.81	279.268	2.09766
1616	1850379	LETMD1	3e-07	3.2e-06	0.1	784.901	361.913	2.16875
1617	7320494	ZFPM1	3e-07	3.2e-06	0.1	334.176	719.202	0.464648
1618	3420519	PPP2R3A	3e-07	3.2e-06	0.1	152.033	319.727	0.475511
1619	1570538	GTF2E2	3e-07	3.2e-06	0.1	1678.94	3601.25	0.466211
1620	6510170	IFIT3	3e-07	3.2e-06	0.1	91.8894	189.299	0.48542
1621	1440022	PARN	3e-07	3.2e-06	0.1	242.925	494.198	0.491554
1622	380424	CFH	3e-07	3.2e-06	0.1	409.556	188.219	2.17595
1623	5690373	GOT1	3e-07	3.2e-06	0.1	5554.2	2651.01	2.09512
1624	6480259	MN1	3e-07	3.2e-06	0.1	218.951	454.872	0.481347
1625	6220671	PLAUR	3e-07	3.2e-06	0.1	3753.77	1849.33	2.0298
1626	1030431	ACSL1	3e-07	3.2e-06	0.1	578.101	280.348	2.06208
1627	2630711	MCM4	3e-07	3.2e-06	0.1	152.609	401.059	0.380515
1628	2940291	QPRT	3e-07	3.2e-06	0.1	421.496	208.988	2.01684
1629	4860468	ARL1	3e-07	3.2e-06	0.1	896.44	1827.11	0.490632
1630	5570524	LRRC42	3e-07	3.2e-06	0.1	825.519	1880.45	0.439001
1631	6200437	AP3M1	3e-07	3.2e-06	0.1	673.728	1461.65	0.460937
1632	130519	STAT2	3e-07	3.2e-06	0.1	1801.7	3851.6	0.46778
1633	3190102	DSN1	3e-07	3.2e-06	0.1	134.728	296.037	0.455103
1634	4230369	NGF	3e-07	3.2e-06	0.1	685.334	1409.95	0.48607
1635	6250594	IHPK2	3e-07	3.2e-06	0.1	448.768	218.916	2.04996
1636	1230438	LOC90379	3e-07	3.2e-06	0.1	110.996	239.196	0.464039
1637	360608	FEZ2	3e-07	3.2e-06	0.1	2583.64	5505.48	0.469286
1638	7570148	LMNB2	3e-07	3.2e-06	0.1	1028.98	2232.98	0.460811
1639	3180048	IDH1	3e-07	3.2e-06	0.1	636.926	302.951	2.1024
1640	2230730	SRBD1	3e-07	3.2e-06	0.1	238.83	502.896	0.47491
1641	780598	TBK1	3e-07	3.2e-06	0.1	347.137	745.783	0.465466
1642	6100735	PUS1	3e-07	3.2e-06	0.1	128.048	271.64	0.471391
1643	360747	COASY	3e-07	3.2e-06	0.1	517.17	1097.24	0.471336
1644	3610398	MMACHC	3e-07	3.2e-06	0.1	111.827	244.624	0.457136
1645	6420142	HSPBAP1	3e-07	3.2e-06	0.1	317.594	145.861	2.17737
1646	3400630	TMPO	3e-07	3.2e-06	0.1	150.785	323.043	0.466764
1647	840358	EXOSC10	3e-07	3.2e-06	0.1	327.47	791.428	0.413771
1648	4830328	CYB561D2	3e-07	3.2e-06	0.1	291.364	601.898	0.484076
1649	1510139		3e-07	3.2e-06	0.1	213.788	443.87	0.481646
1650	1990390	RAB3IP	3e-07	3.2e-06	0.1	343.543	165.777	2.07233
1651	1430735	NET1	3e-07	3.2e-06	0.1	3437.54	1666.72	2.06246
1652	5310050	CCDC71	3e-07	3.2e-06	0.1	219.343	460.863	0.475941
1653	2970632	RP9	3e-07	3.2e-06	0.1	1940.49	909.057	2.13461
1654	6940609	PDGFRA	3e-07	3.2e-06	0.1	857.157	1947.77	0.440071
1655	4150048	FABP5	3e-07	3.2e-06	0.1	1089.42	521.097	2.09062
1656	1580753	PCDH10	3e-07	3.2e-06	0.1	378.524	186.075	2.03426
1657	4150196	RAD51AP1	3e-07	3.2e-06	0.1	160.287	587.475	0.272841
1658	4200437	ENSA	3e-07	3.2e-06	0.1	528.955	236.648	2.2352
1659	4670131	MYO10	3e-07	3.2e-06	0.1	236.754	494.968	0.478321
1660	1240440	TXNIP	3e-07	3.2e-06	0.1	221.658	581.27	0.381334
1661	6560465	CCBE1	3e-07	3.2e-06	0.1	137.964	290.118	0.475546
1662	4760369	CDK7	3e-07	3.2e-06	0.1	1514.23	740.326	2.04536
1663	5560370	MGC3207	3e-07	3.2e-06	0.1	673.324	1391.11	0.484018
1664	1780463	RFC3	3e-07	3.2e-06	0.1	118.378	264.159	0.448133
1665	460132	ZNF75	3e-07	3.2e-06	0.1	328.842	160.314	2.05124
1666	6020273	RPS4Y2	3e-07	3.2e-06	0.1	1470.33	635.62	2.31322
1667	1050500	PLEC1	3e-07	3.2e-06	0.1	629.026	1319.92	0.476564
1668	5310369	LYAR	3e-07	3.2e-06	0.1	1151.1	566.413	2.03227
1669	3870646	PDCL3	3e-07	3.2e-06	0.1	349.608	755.706	0.462625
1670	1740551	MGC42105	3e-07	3.2e-06	0.1	332.122	127.811	2.59855
1671	2640528	C16orf35	3e-07	3.2e-06	0.1	986.517	2039.17	0.483783
1672	2510086	SP1	3e-07	3.2e-06	0.1	155.794	355.391	0.438373
1673	2070619	ZNF721	3e-07	3.2e-06	0.1	778.489	341.885	2.27705
1674	5090754	KIAA0101	3e-07	3.2e-06	0.1	655.364	1623.44	0.403689
1675	6840241	TXLNA	3e-07	3.2e-06	0.1	1741.15	3521.44	0.494441
1676	7380670	MYB	4e-07	4e-06	0.1	274.158	123.528	2.21939
1677	5820471	C14orf149	4e-07	4e-06	0.1	181.698	384.178	0.472952
1678	6980092	PHF23	4e-07	4e-06	0.1	262.761	551.213	0.476697
1679	6580553	ABCC5	4e-07	4e-06	0.1	332.853	162.111	2.05324
1680	7000743	ZWILCH	4e-07	4e-06	0.1	406.943	817.687	0.497675
1681	5490341	CLEC2D	4e-07	4e-06	0.1	1443.55	678.447	2.12772
1682	1070450	PTGS1	4e-07	4e-06	0.1	1505.93	3037.12	0.495843
1683	2850450	GZF1	4e-07	4e-06	0.1	281.637	129.183	2.18014
1684	3840491	PELI2	4e-07	4e-06	0.1	432.765	213.634	2.02573
1685	1850259	NFIC	4e-07	4e-06	0.1	276.43	620.772	0.4453
1686	650326	TFAM	4e-07	4e-06	0.1	1209.95	511.213	2.36681
1687	5960114	MRPL34	4e-07	4e-06	0.1	273.425	591.264	0.462442
1688	1030593	OS9	4e-07	4e-06	0.1	457.444	217.778	2.10051
1689	3830192	ZNF791	4e-07	4e-06	0.1	462.627	219.879	2.10401
1690	2120341	BTBD12	4e-07	4e-06	0.1	116.512	239.717	0.486039
1691	4050446	C11orf68	4e-07	4e-06	0.1	165.273	374.314	0.441536
1692	4210762	MRPL46	4e-07	4e-06	0.1	475.97	1023.17	0.465189
1693	7040711	CKAP2	4e-07	4e-06	0.1	222.013	447.115	0.496545
1694	1570746	LOC651816	4e-07	4e-06	0.1	4562.94	2045.03	2.23123
1695	5080328	DOPEY2	4e-07	4e-06	0.1	271.219	700.138	0.387379
1696	2900292	RANGAP1	4e-07	4e-06	0.1	2442.78	4914.77	0.497028
1697	3780717	SRXN1	4e-07	4e-06	0.1	1961.69	969.831	2.02271
1698	4150079	PRKAA1	4e-07	4e-06	0.1	206.686	430.265	0.480369
1699	5700735	PARP9	4e-07	4e-06	0.1	177.363	365.102	0.485789
1700	2640142	C17orf97	4e-07	4e-06	0.1	114.144	263.201	0.433676
1701	3610440	MAF	4e-07	4e-06	0.1	960.034	460.557	2.08451
1702	1050470	NDC80	4e-07	4e-06	0.1	124.199	317.524	0.39115
1703	7610608	LOC653702	4e-07	4e-06	0.1	702.242	288.27	2.43606
1704	4220605	ETS2	4e-07	4e-06	0.1	687.76	342.99	2.00519
1705	6280601	C6orf48	4e-07	4e-06	0.1	771.93	368.992	2.092
1706	4830010	USP30	4e-07	4e-06	0.1	322.551	145.099	2.22297
1707	7320196	LOC645018	4e-07	4e-06	0.1	1242.57	610.247	2.03618
1708	380152	ZNF2	4e-07	4e-06	0.1	390.985	192.215	2.0341
1709	2940446	TGM2	4e-07	4e-06	0.1	179.019	501.559	0.356926
1710	4780433	RPL29	4e-07	4e-06	0.1	1960.49	948.628	2.06666
1711	630603	ZNF189	4e-07	4e-06	0.1	754.77	358.557	2.10502
1712	4010438	LOC653438	5e-07	4.8e-06	0.1	347.266	721.822	0.481096
1713	3450521	ECM1	5e-07	4.8e-06	0.1	871.064	430.143	2.02506
1714	670703	C6orf173	5e-07	4.8e-06	0.1	260.226	562.726	0.462438
1715	3610280	C9orf127	5e-07	4.8e-06	0.1	786.752	379.206	2.07474
1716	6860411	ST7	5e-07	4.8e-06	0.1	682.283	321.45	2.12252
1717	5960471	BCL9L	5e-07	4.8e-06	0.1	136.442	283.234	0.481729
1718	4730411	SFXN1	5e-07	4.8e-06	0.1	239.388	524.57	0.456351
1719	4730309	PCCA	5e-07	4.8e-06	0.1	196.723	408.844	0.48117
1720	1710736	DOCK10	5e-07	4.8e-06	0.1	535.512	1109.63	0.482603
1721	520463	GPER	5e-07	4.8e-06	0.1	635.845	314.256	2.02333
1722	7650435	XTP3TPA	5e-07	4.8e-06	0.1	672.154	1460.41	0.460251
1723	1690678	SNF1LK	5e-07	4.8e-06	0.1	268.579	125.913	2.13306
1724	7610292	SYNPO2	5e-07	4.8e-06	0.1	156.934	323.495	0.485121
1725	2650706	TRADD	5e-07	4.8e-06	0.1	191.366	389.233	0.491649
1726	1510424	S100P	5e-07	4.8e-06	0.1	202.456	100.934	2.00581
1727	5900224	OR51T1	5e-07	4.8e-06	0.1	289.785	123.488	2.34668
1728	780528	CKS2	5e-07	4.8e-06	0.1	6085.73	2921.61	2.083
1729	4780524	ZNF274	6e-07	5.7e-06	0.1	400.719	181.514	2.20764
1730	7380470	OSBPL9	6e-07	5.7e-06	0.1	936.981	1960.14	0.478018
1731	6940719	PAPOLA	6e-07	5.7e-06	0.1	3181.39	1572.31	2.02339
1732	5900471	PTGER2	6e-07	5.7e-06	0.1	329.04	151.048	2.17838
1733	670639	LONP2	6e-07	5.7e-06	0.1	330.676	786.921	0.420214
1734	5360324	GRINL1A	6e-07	5.7e-06	0.1	502.615	239.857	2.09548
1735	7200367	PDE1C	6e-07	5.7e-06	0.1	119.921	241.091	0.497411
1736	4860184	PCBD1	6e-07	5.7e-06	0.1	1098.86	526.2	2.0883
1737	6020400	CNNM4	6e-07	5.7e-06	0.1	251.275	117.439	2.13963
1738	4900168	TSPAN5	6e-07	5.7e-06	0.1	365.604	752.374	0.485934
1739	3940079	C3orf52	6e-07	5.7e-06	0.1	429.558	179.635	2.39129
1740	240053	GCH1	6e-07	5.7e-06	0.1	264.004	119.162	2.2155
1741	1090521	SEZ6L2	6e-07	5.7e-06	0.1	570.675	279.443	2.04219
1742	2490170	FLJ20628	6e-07	5.7e-06	0.1	175.773	386.745	0.454494
1743	2470035	KIF18A	6e-07	5.7e-06	0.1	119.233	250.125	0.476691
1744	270224	MOAP1	7e-07	6.5e-06	0.1	872.962	424.705	2.05546
1745	6900674	ANKRD10	7e-07	6.5e-06	0.1	565.384	254.854	2.21846
1746	1500553	NUSAP1	7e-07	6.5e-06	0.1	388.968	782.545	0.497055
1747	4920053	BTG3	7e-07	6.5e-06	0.1	4859.78	2356.74	2.06208
1748	6330725	BCL3	7e-07	6.5e-06	0.1	161.364	363.816	0.443531
1749	940180	RBBP5	7e-07	6.5e-06	0.1	574.528	278.23	2.06494
1750	1090181	LOC441050	7e-07	6.5e-06	0.1	373.981	183.996	2.03255
1751	7610494	CDCA4	7e-07	6.5e-06	0.1	153.013	354.116	0.432098
1752	6580364	NEK7	7e-07	6.5e-06	0.1	170.709	353.436	0.482997
1753	4210280	PGCP	7e-07	6.5e-06	0.1	811.265	378.473	2.14352
1754	1470296	LAMA2	7e-07	6.5e-06	0.1	919.127	451.187	2.03713
1755	1010181	SAMD8	7e-07	6.5e-06	0.1	270.096	130.532	2.06919
1756	1510014	PCNT	7e-07	6.5e-06	0.1	235.371	513.792	0.458104
1757	5910093	PCDH10	8e-07	7.3e-06	0.1	600.333	296.396	2.02544
1758	6510332	EPHA2	8e-07	7.3e-06	0.1	499.684	221.766	2.2532
1759	6220504	CTH	8e-07	7.3e-06	0.1	289.655	127.147	2.27812
1760	7400025	MTP18	8e-07	7.3e-06	0.1	159.941	334.431	0.478249
1761	2600537	CBFB	8e-07	7.3e-06	0.1	1283.24	629.429	2.03874
1762	7550243	TMEM38B	8e-07	7.3e-06	0.1	501.418	235.813	2.12634
1763	1570075	FBXO4	8e-07	7.3e-06	0.1	183.929	370.493	0.496445
1764	7550139	STAU2	8e-07	7.3e-06	0.1	169.748	343.635	0.493977
1765	4050408	BNC1	8e-07	7.3e-06	0.1	223.302	99.5702	2.24266
1766	6980475	EFTUD2	8e-07	7.3e-06	0.1	703.532	1506.31	0.467055
1767	6420253	BAT2	8e-07	7.3e-06	0.1	298.79	598.285	0.499411
1768	7150274	SP3	8e-07	7.3e-06	0.1	336.745	693.629	0.485483
1769	1710204	ADAT1	8e-07	7.3e-06	0.1	186.521	386.69	0.482352
1770	1440050	C9orf75	8e-07	7.3e-06	0.1	290.511	137.265	2.11642
1771	3890309	RFC3	8e-07	7.3e-06	0.1	116.928	307.32	0.380476
1772	4220612	FANCG	8e-07	7.3e-06	0.1	171.485	390.158	0.439527
1773	5690112	ERO1LB	9e-07	8e-06	0.1	224.398	107.12	2.09482
1774	2570079	STAT1	9e-07	8e-06	0.1	765.734	1610.01	0.475607
1775	6900176	TSEN2	9e-07	8e-06	0.1	151.433	311.832	0.485624
1776	1450156	MAGOH	9e-07	8e-06	0.1	1336.01	653.285	2.04506
1777	610301	PHLDB2	9e-07	8e-06	0.1	193.784	393.432	0.492546
1778	3930020	CTSF	9e-07	8e-06	0.1	1003.81	492.943	2.03635
1779	6110541	ZNF260	1e-06	8.8e-06	0.1	194.915	441.302	0.441681
1780	6760192	CHP	1e-06	8.8e-06	0.1	628.394	301.979	2.08092
1781	6330332	KRTAP4-12	1e-06	8.8e-06	0.1	242.731	119.898	2.02448
1782	1500753	VARS2	1e-06	8.8e-06	0.1	197.009	398.193	0.494758
1783	6400240	KIAA0368	1e-06	8.8e-06	0.1	284.602	138.454	2.05557
1784	130138	APCDD1L	1.1e-06	9.5e-06	0.1	656.749	1443.62	0.454932
1785	2600553	MCRS1	1.1e-06	9.5e-06	0.1	141.264	316.401	0.446472
1786	1470762	AUTS2	1.1e-06	9.5e-06	0.1	535.82	265.109	2.02113
1787	2750187	NEXN	1.1e-06	9.5e-06	0.1	630.082	1455.49	0.432899
1788	6110246	C22orf29	1.1e-06	9.5e-06	0.1	131.564	273.082	0.481776
1789	2000110	BRSK1	1.1e-06	9.5e-06	0.1	853.28	425.269	2.00645
1790	6560131	FAM135A	1.1e-06	9.5e-06	0.1	318.181	156.577	2.0321
1791	2190010	RACGAP1	1.1e-06	9.5e-06	0.1	369.211	774.455	0.476737
1792	3800474	ZWINT	1.1e-06	9.5e-06	0.1	147.928	340.778	0.43409
1793	6580685	MCM10	1.1e-06	9.5e-06	0.1	103.109	220.588	0.467427
1794	20470	GRASP	1.1e-06	9.5e-06	0.1	259.288	118.908	2.18058
1795	670025	CORO1C	1.1e-06	9.5e-06	0.1	1248.52	2529.72	0.49354
1796	4120750	OBFC1	1.1e-06	9.5e-06	0.1	222.069	480.123	0.462525
1797	6560112	ANKRD1	1.2e-06	1.01e-05	0.1	1049.12	450.221	2.33023
1798	4540328	RNF220	1.2e-06	1.01e-05	0.1	351.133	708.155	0.495842
1799	2230379	NAMPT	1.2e-06	1.01e-05	0.1	502.868	239.292	2.10148
1800	1070474	C5orf37	1.2e-06	1.01e-05	0.1	139.16	285.374	0.487641
1801	4570255	LEF1	1.2e-06	1.01e-05	0.1	239.803	119.804	2.00162
1802	5700086	CENPK	1.2e-06	1.01e-05	0.1	130.201	268.605	0.484731
1803	6020482	KHDRBS3	1.2e-06	1.01e-05	0.1	525.972	251.206	2.09379
1804	7560543	MOCS1	1.2e-06	1.01e-05	0.1	415.131	853.663	0.486294
1805	1410735	ZSCAN5A	1.3e-06	1.09e-05	0.1	340.102	145.126	2.34349
1806	4390162	RFC2	1.3e-06	1.09e-05	0.1	142.926	294.319	0.485617
1807	3930504		1.3e-06	1.09e-05	0.1	267.94	127.63	2.09935
1808	5290026	CCDC85A	1.3e-06	1.09e-05	0.1	199.681	416.062	0.479929
1809	1170482	PEX14	1.3e-06	1.09e-05	0.1	152.074	307.508	0.494536
1810	2100332	TFIP11	1.4e-06	1.16e-05	0.1	691.936	341.328	2.02719
1811	3190437	LRSAM1	1.4e-06	1.16e-05	0.1	195.5	391.539	0.499312
1812	3190066	ARFGAP2	1.4e-06	1.16e-05	0.1	201.243	459.797	0.437678
1813	5080154	ATXN1	1.5e-06	1.23e-05	0.1	288.588	695.987	0.414645
1814	4070324	CAPRIN1	1.5e-06	1.23e-05	0.1	283.435	573.706	0.494043
1815	3370274	ANKRD11	1.6e-06	1.3e-05	0.1	723.07	1490.95	0.484971
1816	4040398	MAL	1.7e-06	1.37e-05	0.1	225.828	103.822	2.17515
1817	1940647	HBP1	1.7e-06	1.37e-05	0.1	1100.67	543.008	2.02698
1818	5220543	C14orf138	1.7e-06	1.37e-05	0.1	396.42	186.602	2.12441
1819	6100524	ARFGEF1	1.7e-06	1.37e-05	0.1	262.378	541.576	0.48447
1820	2570725	PPCS	1.7e-06	1.37e-05	0.1	533.531	1132.29	0.471195
1821	2100053	ST5	1.7e-06	1.37e-05	0.1	178.794	384.715	0.464742
1822	7210681	LIPG	1.8e-06	1.44e-05	0.1	221.151	108.003	2.04763
1823	4830634	CDCA8	1.8e-06	1.44e-05	0.1	192.743	411.126	0.468816
1824	7330551	ECD	1.9e-06	1.51e-05	0.1	209.926	449.472	0.467049
1825	6330243	VPS33B	1.9e-06	1.51e-05	0.1	191.018	383.596	0.497965
1826	2510091	COL8A1	1.9e-06	1.51e-05	0.1	2561.33	5844.7	0.438231
1827	7610538	H1FX	2e-06	1.58e-05	0.1	269.705	635.978	0.424079
1828	840682	DAPK3	2e-06	1.58e-05	0.1	149.587	399.663	0.374283
1829	450292	TUBB2A	2e-06	1.58e-05	0.1	1320.04	634.638	2.07999
1830	1010482	TPM1	2.1e-06	1.64e-05	0.1	107.622	216.746	0.496537
1831	2260402	LOC642393	2.2e-06	1.71e-05	0.1	260.983	127.827	2.04169
1832	1240523	RPL41	2.2e-06	1.71e-05	0.1	562.272	271.671	2.06968
1833	4040176	LAMA5	2.2e-06	1.71e-05	0.1	2497.9	1166.99	2.14047
1834	3120100		2.2e-06	1.71e-05	0.1	119.232	243.603	0.489453
1835	10196	C21orf33	2.3e-06	1.77e-05	0.1	354.857	729.903	0.48617
1836	1710397	HYLS1	2.3e-06	1.77e-05	0.1	211.44	429.912	0.491821
1837	7210377	GPR37	2.3e-06	1.77e-05	0.1	522.405	243.932	2.1416
1838	1430528	EIF2C3	2.4e-06	1.83e-05	0.1	347.591	169.423	2.05162
1839	2070162	BZW1	2.4e-06	1.83e-05	0.1	613.23	300.837	2.03841
1840	3830093	LMCD1	2.4e-06	1.83e-05	0.1	2604.8	5257.46	0.495449
1841	6650176	TRMT11	2.5e-06	1.9e-05	0.1	193.248	388.235	0.49776
1842	3130240	PDGFRA	2.6e-06	1.96e-05	0.1	430.544	881.66	0.488333
1843	6510192	GBF1	2.6e-06	1.96e-05	0.1	150.979	308.579	0.489271
1844	3940201	OR7E156P	2.7e-06	2.02e-05	0.1	371.133	180.671	2.05419
1845	5960224	PTTG3	2.8e-06	2.08e-05	0.1	1608.77	735.537	2.18721
1846	6860113	COBRA1	3e-06	2.21e-05	0.1	354.664	771.511	0.459701
1847	4810674	ZFAND6	3.1e-06	2.27e-05	0.1	583.516	287.339	2.03076
1848	2320286	JARID2	3.3e-06	2.39e-05	0.1	155.358	343.353	0.452473
1849	7650592	PSMC3IP	3.3e-06	2.39e-05	0.1	127.215	256.78	0.495423
1850	580767	FAM101B	3.4e-06	2.45e-05	0.1	654.101	1504.46	0.434774
1851	150743	LOC642250	3.7e-06	2.64e-05	0.1	402.069	194.686	2.06522
1852	5220484	MLX	3.9e-06	2.76e-05	0.1	121.803	253.847	0.479828
1853	1470647	KIF2C	4e-06	2.81e-05	0.1	118.103	243.35	0.485323
1854	4260368	UBE2C	4.2e-06	2.94e-05	0.1	726.639	1585.27	0.458368
1855	3130358		4.2e-06	2.94e-05	0.1	728.062	359.143	2.02722
1856	5390189	TUBG1	4.3e-06	2.99e-05	0.1	318.489	696.029	0.457579
1857	2710746	BCAR1	4.5e-06	3.1e-05	0.1	336.068	809.513	0.415149
1858	830709	LOC730050	4.7e-06	3.2e-05	0.1	245.205	119.973	2.04384
1859	240221	DLG7	4.7e-06	3.2e-05	0.1	126.338	256.849	0.491876
1860	3940286	MST4	4.7e-06	3.2e-05	0.1	350.213	172.303	2.03254
1861	5130474	GABRE	4.8e-06	3.27e-05	0.1	339.706	134.623	2.52338
1862	630544	YTHDC1	5e-06	3.39e-05	0.1	262.603	127.283	2.06314
1863	3710673	HDDC3	5e-06	3.39e-05	0.1	201.497	520.298	0.387272
1864	1010082		5.8e-06	3.84e-05	0.1	149.405	309.608	0.482561
1865	6840324	RPL13L	5.9e-06	3.9e-05	0.1	1534.57	746.693	2.05515
1866	2690524	BLCAP	6.4e-06	4.17e-05	0.1	277.898	650.486	0.427215
1867	2630673	ASF1B	6.4e-06	4.17e-05	0.1	162.691	352.112	0.462044
1868	1300228	CUEDC1	6.6e-06	4.28e-05	0.1	385.849	797.989	0.483527
1869	450300	ANKFY1	6.6e-06	4.28e-05	0.1	236.411	509.908	0.463633
1870	7560129	ZNF75A	6.9e-06	4.45e-05	0.1	311.444	153.584	2.02785
1871	3830136	NACAP1	7.7e-06	4.88e-05	0.1	834.39	405.682	2.05676
1872	6220180	CABC1	8.6e-06	5.36e-05	0.1	131.133	270.039	0.485606
1873	1990717	C1orf63	8.7e-06	5.41e-05	0.1	263.623	121.572	2.16846
1874	1240064	ZNF281	1.19e-05	7.07e-05	0.1	664.175	1749.88	0.379555
1875	5700669	WDR55	1.3e-05	7.63e-05	0.1	155.592	321.081	0.484588
1876	3140092	TRAK1	1.64e-05	9.27e-05	0.1	279.328	575.864	0.485059
1877	1770593	CH25H	1.72e-05	9.66e-05	0.1	124.75	268.108	0.465297
1878	4210044	SNORD46	1.78e-05	9.95e-05	0.1	225.018	104.26	2.15824
1879	7160707	TBC1D14	1.82e-05	0.0001013	0.1	306.91	696.817	0.440446
1880	3390343	SREBF1	1.83e-05	0.0001018	0.1	153.892	326.762	0.470961
1881	5310471	UBE2C	1.85e-05	0.0001027	0.1	683.524	1474.99	0.463408
1882	270296	PPP2CB	3.85e-05	0.0001937	0.1	431.734	215.353	2.00477
1883	3870242	SLC25A36	6.59e-05	0.0003069	0.1	362.623	176.311	2.05672

## Sheet: B-2
Bio-functions in Fibroblasts
Category	Functions Annotation	Nominal p-Value	Corrected p-Value	Number of Genes	Genes
Cancer	tumorigenesis	2.63E-46	1.24E-42	530	ABCC5,ACTC1,ADAMTS1,AFAP1,AHR,AKAP13,AKR1C1/AKR1C2,ALAS1,ALDH1B1,AMD1,ANAPC10,ANGPT1,ANGPTL2,ANGPTL4,ANLN,ANPEP,APAF1,APBA3,APOD,ARAP3,ARFGEF1,ARHGAP1,ARHGEF2,ARID5B,ARL5B,ASF1B,ASH2L,ASS1,ASXL1,ATF3,ATIC,ATP1A1,ATP1B1,ATXN1,AURKB,AXIN2,BAMBI,BAX,BCAR1,BCCIP,BCL10,BCL2L1,BCL3,BCL6,BCLAF1,BDNF,BEX1,BEX2,BHLHE40,BIRC5,BMP2,BMP4,BNC1,BRF2,BTG1,BTG2,BTG3,BUB1 (includes EG:100307076),BZW1,C10orf54,C13…
Cancer	neoplasia	3.42E-44	8.08E-41	512	ABCC5,ACTC1,ADAMTS1,AFAP1,AHR,AKAP13,AKR1C1/AKR1C2,ALAS1,ALDH1B1,AMD1,ANAPC10,ANGPT1,ANGPTL2,ANGPTL4,ANLN,ANPEP,APAF1,APBA3,APOD,ARAP3,ARFGEF1,ARHGAP1,ARHGEF2,ARID5B,ARL5B,ASF1B,ASH2L,ASS1,ASXL1,ATF3,ATIC,ATP1A1,ATP1B1,ATXN1,AURKB,AXIN2,BAMBI,BAX,BCAR1,BCCIP,BCL10,BCL2L1,BCL3,BCL6,BCLAF1,BEX1,BEX2,BHLHE40,BIRC5,BMP2,BNC1,BRF2,BTG1,BTG2,BTG3,BUB1 (includes EG:100307076),BZW1,C10orf54,C13orf15,C17o…
Cancer	cancer	1.28E-43	2.02E-40	504	ABCC5,ACTC1,ADAMTS1,AFAP1,AHR,AKAP13,AKR1C1/AKR1C2,ALAS1,ALDH1B1,AMD1,ANAPC10,ANGPT1,ANGPTL2,ANGPTL4,ANLN,ANPEP,APAF1,APBA3,APOD,ARAP3,ARFGEF1,ARHGAP1,ARHGEF2,ARID5B,ARL5B,ASF1B,ASH2L,ASS1,ASXL1,ATF3,ATIC,ATP1A1,ATP1B1,ATXN1,AURKB,AXIN2,BAMBI,BAX,BCAR1,BCCIP,BCL10,BCL2L1,BCL3,BCL6,BCLAF1,BEX1,BEX2,BHLHE40,BIRC5,BMP2,BNC1,BRF2,BTG1,BTG2,BTG3,BUB1 (includes EG:100307076),BZW1,C10orf54,C13orf15,C17o…
Cancer	carcinoma	8.59E-37	9.26E-34	410	ABCC5,ACTC1,ADAMTS1,AFAP1,AHR,AKAP13,AKR1C1/AKR1C2,ALAS1,ALDH1B1,AMD1,ANGPT1,ANGPTL2,ANLN,ANPEP,APOD,ARFGEF1,ARHGEF2,ARL5B,ASF1B,ASH2L,ASS1,ATF3,ATIC,ATP1A1,ATP1B1,ATXN1,AURKB,AXIN2,BAMBI,BAX,BCAR1,BCCIP,BCL10,BEX1,BEX2,BHLHE40,BIRC5,BMP2,BNC1,BRF2,BTG2,BTG3,BUB1 (includes EG:100307076),BZW1,C10orf54,C13orf15,C17orf81,C1orf63,C1R,C1S,CA2,CACYBP,CALB2,CBFB,CCL2,CCNA2,CCNB2,CCND1,CCT4,CD14,CD24,CD2…
Cancer	solid tumor	9.80E-37	9.26E-34	415	ABCC5,ACTC1,ADAMTS1,AFAP1,AHR,AKAP13,AKR1C1/AKR1C2,ALAS1,ALDH1B1,AMD1,ANGPT1,ANGPTL2,ANGPTL4,ANLN,ANPEP,APOD,ARFGEF1,ARHGEF2,ARL5B,ASF1B,ASH2L,ASS1,ATF3,ATIC,ATP1A1,ATP1B1,ATXN1,AURKB,AXIN2,BAMBI,BAX,BCAR1,BCCIP,BCL10,BEX1,BEX2,BHLHE40,BIRC5,BMP2,BNC1,BRF2,BTG2,BTG3,BUB1 (includes EG:100307076),BZW1,C10orf54,C13orf15,C17orf81,C1orf63,C1R,C1S,CA2,CACYBP,CALB2,CBFB,CCL2,CCNA2,CCNB2,CCND1,CCT4,CD14,…
Cancer	gastrointestinal tract cancer	3.34E-29	2.63E-26	199	ADAMTS1,AKAP13,AKR1C1/AKR1C2,ALAS1,ANGPTL2,ANPEP,ARAP3,ATF3,AXIN2,BAX,BEX1,BIRC5,BMP2,C10orf54,C17orf81,C1orf63,C1R,CA2,CACYBP,CCL2,CCNA2,CCNB2,CCND1,CCT4,CD24,CD248,CD44 (includes EG:100330801),CDCA5,CDCA7,CDCA8,CDH2,CDK1,CDK2,CDK4,CDK6,CDK7,CDK9,CDKN1A,CDKN2C,CEBPA,CEBPD,CENPF,CEP55,CNNM4,CPA4,CPEB4,CSE1L,CYR61,DDX39B,DKK1,DLGAP5,DNAJA1,DNAJB9,DUSP5,EFNB1,ENC1,EPHA2,ERBB2,ERRFI1,EXO1 (includes …
Gastrointestinal Disease	gastrointestinal tract cancer	3.34E-29	2.63E-26	199	ADAMTS1,AKAP13,AKR1C1/AKR1C2,ALAS1,ANGPTL2,ANPEP,ARAP3,ATF3,AXIN2,BAX,BEX1,BIRC5,BMP2,C10orf54,C17orf81,C1orf63,C1R,CA2,CACYBP,CCL2,CCNA2,CCNB2,CCND1,CCT4,CD24,CD248,CD44 (includes EG:100330801),CDCA5,CDCA7,CDCA8,CDH2,CDK1,CDK2,CDK4,CDK6,CDK7,CDK9,CDKN1A,CDKN2C,CEBPA,CEBPD,CENPF,CEP55,CNNM4,CPA4,CPEB4,CSE1L,CYR61,DDX39B,DKK1,DLGAP5,DNAJA1,DNAJB9,DUSP5,EFNB1,ENC1,EPHA2,ERBB2,ERRFI1,EXO1 (includes …
Cancer	digestive organ tumor	7.05E-29	4.76E-26	246	ABCC5,ADAMTS1,AHR,AKAP13,AKR1C1/AKR1C2,ALAS1,ANGPTL2,ANLN,ANPEP,ARAP3,ASF1B,ATF3,ATIC,ATP1A1,AXIN2,BAX,BEX1,BIRC5,BMP2,BZW1,C10orf54,C17orf81,C1orf63,C1R,C1S,CA2,CACYBP,CCL2,CCNA2,CCNB2,CCND1,CCT4,CD14,CD24,CD248,CD44 (includes EG:100330801),CD59 (includes EG:25407),CDCA5,CDCA7,CDCA8,CDH2,CDK1,CDK2,CDK4,CDK6,CDK7,CDK9,CDKN1A,CDKN2B,CDKN2C,CEBPA,CEBPD,CENPF,CEP55,CKS2,CNNM4,CPA4,CPEB4,CSE1L,CYR61,…
Gastrointestinal Disease	digestive organ tumor	7.05E-29	4.76E-26	246	ABCC5,ADAMTS1,AHR,AKAP13,AKR1C1/AKR1C2,ALAS1,ANGPTL2,ANLN,ANPEP,ARAP3,ASF1B,ATF3,ATIC,ATP1A1,AXIN2,BAX,BEX1,BIRC5,BMP2,BZW1,C10orf54,C17orf81,C1orf63,C1R,C1S,CA2,CACYBP,CCL2,CCNA2,CCNB2,CCND1,CCT4,CD14,CD24,CD248,CD44 (includes EG:100330801),CD59 (includes EG:25407),CDCA5,CDCA7,CDCA8,CDH2,CDK1,CDK2,CDK4,CDK6,CDK7,CDK9,CDKN1A,CDKN2B,CDKN2C,CEBPA,CEBPD,CENPF,CEP55,CKS2,CNNM4,CPA4,CPEB4,CSE1L,CYR61,…
Cancer	colorectal cancer	9.36E-27	5.53E-24	179	ADAMTS1,AKAP13,AKR1C1/AKR1C2,ALAS1,ANGPTL2,ANPEP,ATF3,AXIN2,BAX,BEX1,BIRC5,BMP2,C10orf54,C17orf81,C1orf63,C1R,CA2,CACYBP,CCL2,CCNA2,CCNB2,CCND1,CCT4,CD24,CD248,CD44 (includes EG:100330801),CDCA5,CDCA7,CDCA8,CDH2,CDK4,CDK7,CDKN1A,CDKN2C,CEBPD,CENPF,CEP55,CNNM4,CPA4,CPEB4,CSE1L,CYR61,DKK1,DLGAP5,DNAJA1,DNAJB9,DUSP5,EFNB1,ENC1,ERBB2,ERRFI1,EXO1 (includes EG:26909),EXOSC9,FBXL2,FLCN,FLRT2,FNTB,FZD4,G…
Gastrointestinal Disease	colorectal cancer	9.36E-27	5.53E-24	179	ADAMTS1,AKAP13,AKR1C1/AKR1C2,ALAS1,ANGPTL2,ANPEP,ATF3,AXIN2,BAX,BEX1,BIRC5,BMP2,C10orf54,C17orf81,C1orf63,C1R,CA2,CACYBP,CCL2,CCNA2,CCNB2,CCND1,CCT4,CD24,CD248,CD44 (includes EG:100330801),CDCA5,CDCA7,CDCA8,CDH2,CDK4,CDK7,CDKN1A,CDKN2C,CEBPD,CENPF,CEP55,CNNM4,CPA4,CPEB4,CSE1L,CYR61,DKK1,DLGAP5,DNAJA1,DNAJB9,DUSP5,EFNB1,ENC1,ERBB2,ERRFI1,EXO1 (includes EG:26909),EXOSC9,FBXL2,FLCN,FLRT2,FNTB,FZD4,G…
Gene Expression	expression of RNA	2.01E-26	1.06E-23	251	AHR,ARID5B,ARNT2,ASH2L,ATF3,ATF4,ATXN1,BAMBI,BCL10,BCL3,BCL6,BCL9L,BCLAF1,BHLHE40,BIRC2,BIRC5,BMP2,BMP4,BNC1,BRD7,BRPF1,BTF3,BTG1,BTG2,CBFB,CBX4,CBY1,CCND1,CCNK,CD44 (includes EG:100330801),CDK2,CDK7,CDK9,CDKN1A,CDKN2C,CEBPA,CEBPD,CENPF,CFLAR,CIR1,CITED2,COBRA1,CREB3L2,CSE1L,CSRNP1,CSRNP2,CTDSP1,CTDSP2,DAB2,DDIT3,DNAJB1,DNMT1,E2F2,E2F6,E4F1,ECD,ECM1 (includes EG:100332249),ECT2,EGR2,EGR3,EIF2AK3,…
Gene Expression	transcription of RNA	4.49E-26	2.12E-23	232	AHR,ARID5B,ARNT2,ASH2L,ATF3,ATF4,ATXN1,BAMBI,BCL10,BCL3,BCL6,BCL9L,BCLAF1,BHLHE40,BIRC2,BIRC5,BMP2,BMP4,BNC1,BRD7,BRPF1,BTF3,BTG1,BTG2,CBFB,CBX4,CBY1,CCND1,CCNK,CD44 (includes EG:100330801),CDK2,CDK7,CDK9,CDKN1A,CDKN2C,CEBPA,CEBPD,CENPF,CFLAR,CIR1,CITED2,COBRA1,CREB3L2,CSE1L,CSRNP1,CSRNP2,CTDSP1,CTDSP2,DAB2,DDIT3,DNMT1,E2F2,E2F6,E4F1,ECD,ECM1 (includes EG:100332249),ECT2,EGR2,EGR3,EPC1,ERBB2,ETS2…
Gene Expression	transcription	1.23E-25	5.27E-23	235	AHR,AKAP13,ARID5B,ARNT2,ASH2L,ATF3,ATF4,ATXN1,BAMBI,BCL10,BCL3,BCL6,BCL9L,BCLAF1,BHLHE40,BIRC2,BIRC5,BMP2,BMP4,BNC1,BRD7,BRPF1,BTF3,BTG1,BTG2,CBFB,CBX4,CBY1,CCND1,CCNK,CD44 (includes EG:100330801),CDK2,CDK7,CDK9,CDKN1A,CDKN2C,CEBPA,CEBPD,CENPF,CFLAR,CIR1,CITED2,COBRA1,CREB3L2,CSE1L,CSRNP1,CSRNP2,CTDSP1,CTDSP2,DAB2,DDIT3,DNMT1,E2F2,E2F6,E4F1,ECD,ECM1 (includes EG:100332249),ECT2,EGR2,EGR3,EPC1,ERB…
Cell Cycle	cell cycle progression	3.67E-22	1.45E-19	127	AHR,AKAP8,ANAPC4,ANLN,ATF3,AURKB,BAX,BCAR1,BCL6,BEX2,BHLHE40,BIRC5,BMP2,BMP4,BRD7,BTG3,BUB1 (includes EG:100307076),CASP2,CCNA2,CCNB1IP1,CCND1,CD24,CD44 (includes EG:100330801),CDC16,CDC20,CDCA5,CDCA8,CDK1,CDK2,CDK4,CDK6,CDK7,CDK9,CDKN1A,CDKN2B,CDKN2C,CEBPA,CENPF,CHEK1,CKAP2,CKS2,CSE1L,CSNK2A2,CYR61,DLGAP5,DNAJB4,DNMT1,DTL,DTYMK,E2F2,ERBB2,FBXO5,FGF2,FOXA1,GADD45A,GAS1 (includes EG:14451),GATA2,H…
Cell Death	apoptosis	7.84E-22	2.85E-19	243	ADAMTSL4,AHR,AHSA1,AKAP8,ANGPT1,ANGPTL4,ANKRD1,ANPEP,APAF1,ATF3,ATXN2,BAG3,BAX,BCAR1,BCL10,BCL2L1,BCL3,BCL6,BCLAF1,BDNF,BEX2,BHLHE40,BIRC2,BIRC5,BLCAP,BMP2,BMP4,BRAT1,BTG1,C8orf4,CASP2,CBX4,CCL2,CCND1,CD14,CD24,CD44 (includes EG:100330801),CD55,CD59 (includes EG:25407),CDC20,CDC45,CDH2,CDK1,CDK2,CDK5R1,CDK6,CDKN1A,CDKN2C,CEBPA,CEBPD,CFH,CFLAR,CHEK1,CHKA,CKAP2,CRADD,CRYAB,CSE1L,CSNK2A2,CYB5A,CYR61…
Gene Expression	transcription of DNA	1.27E-21	4.29E-19	183	AHR,ARID5B,ARNT2,ASH2L,ATF3,ATF4,ATXN1,BAMBI,BCL10,BCL3,BCL6,BCL9L,BCLAF1,BMP2,BMP4,BNC1,BRD7,BRPF1,BTF3,CBFB,CBX4,CBY1,CCNK,CDK7,CEBPA,CEBPD,CENPF,CIR1,CITED2,CREB3L2,CSRNP1,CSRNP2,CTDSP1,DAB2,DNMT1,E2F6,E4F1,ECD,EGR2,EGR3,EPC1,ETS2,ETV5,ETV6,FADD,FGF2,FOSB,FOXA1,FOXA3,FOXD2,FZD2,FZD4,GATA2,GCM1,GLI2,GTF2H4,GTF3C2,GZF1,HCFC1,HES6,HEY1,HEY2,HOXA5,HSPA8,ID1,ID3 (includes EG:15903),IGBP1,IL11,IL6,I…
Cell Death	apoptosis of tumor cell lines	2.72E-21	8.56E-19	170	AHSA1,ANKRD1,APAF1,ATF3,BAG3,BAX,BCAR1,BCL10,BCL2L1,BCL3,BCL6,BCLAF1,BDNF,BEX2,BHLHE40,BIRC2,BIRC5,BMP2,BMP4,BRAT1,CASP2,CCND1,CD24,CD44 (includes EG:100330801),CD55,CD59 (includes EG:25407),CDC20,CDK1,CDK5R1,CDK6,CDKN1A,CDKN2C,CEBPA,CEBPD,CFH,CFLAR,CHKA,CKAP2,CRYAB,CSE1L,CSNK2A2,CYB5A,CYR61,DAB2,DAPK3,DDIT3,DKK1,DLL1,DNAJA3,DNAJB1,DTYMK,EEF2K,EGR3,EIF2AK3,EPHA2,ERBB2,ERN1,ETS2,FADD,FBXO32,FGF2,F…
Cell Death	cell death of tumor cell lines	3.31E-21	9.78E-19	190	AHSA1,ANKRD1,APAF1,ATF3,BAG3,BAX,BCAR1,BCL10,BCL2L1,BCL3,BCL6,BCLAF1,BDNF,BEX2,BHLHE40,BIRC2,BIRC5,BMP2,BMP4,BRAT1,BTG1,BTG2,CASP2,CCL2,CCND1,CD24,CD44 (includes EG:100330801),CD55,CD59 (includes EG:25407),CDC20,CDK1,CDK5R1,CDK6,CDKN1A,CDKN2C,CEBPA,CEBPD,CFH,CFLAR,CHEK1,CHKA,CKAP2,CREB3L2,CRYAB,CSE1L,CSNK2A2,CYB5A,CYR61,DAB2,DAPK3,DDIT3,DKK1,DLL1,DNAJA3,DNAJB1,DTYMK,EEF2K,EGR3,EIF2AK3,EPHA2,ERBB2…
Cell Death	cell death	3.64E-21	1.01E-18	303	ABCC5,ADAMTSL4,ADK,AHR,AHSA1,AKAP13,AKAP8,ALPK2,ANGPT1,ANGPTL4,ANKRD1,ANLN,ANPEP,APAF1,ARAP3,ATF3,ATF4,ATXN2,AXIN2,BAG3,BAX,BCAR1,BCKDK,BCL10,BCL2L1,BCL3,BCL6,BCLAF1,BDNF,BEX2,BHLHE40,BIRC2,BIRC5,BLCAP,BMP2,BMP4,BRAT1,BTG1,BTG2,C8orf4,CA2,CALB2,CASP2,CBX4,CCL2,CCNA2,CCND1,CD14,CD24,CD44 (includes EG:100330801),CD55,CD59 (includes EG:25407),CDC20,CDC45,CDH2,CDK1,CDK2,CDK5R1,CDK6,CDKN1A,CDKN2C,CEBP…
Cellular Growth and Proliferation	proliferation of cells	2.69E-20	7.05E-18	231	ADAMTS1,AFAP1,AGGF1,AKAP13,APAF1,APPL2,ARHGEF2,ASH2L,AURKB,AXIN2,B4GALT7,BAMBI,BAX,BCAR1,BCAR3,BCL2L1,BCL3,BCL6,BDNF,BEX2,BIRC2,BIRC5,BMP2,BMP4,BNC1,BTG1,BTG2,BTG3,BUB1 (includes EG:100307076),C8orf4,CASP2,CAV2,CCL2,CCL26,CCND1,CD14,CD24,CD44 (includes EG:100330801),CD83,CDC16,CDC45,CDCA7,CDH2,CDK1,CDK2,CDK4,CDK5R1,CDK6,CDK7,CDK9,CDKN1A,CDKN2B,CDKN2C,CEBPA,CENPB,CHEK1,CHKA,CITED2,CKLF,CKS2,CLK1,C…
Cancer	mammary tumor	9.25E-19	2.30E-16	163	ABCC5,AKR1C1/AKR1C2,ARFGEF1,ARHGEF2,ASH2L,ATF3,AURKB,BAX,BCAR1,BEX1,BEX2,BHLHE40,BIRC5,BRF2,BTG2,BUB1 (includes EG:100307076),CCL2,CCNA2,CCNB2,CCND1,CD24,CD44 (includes EG:100330801),CDC20,CDCA7,CDH2,CDK1,CDK4,CDKN1A,CDT1,CEBPA,CEBPD,CHEK1,CLK2,CNDP2,CPEB2,CRYAB,CSE1L,CXXC5,CYR61,DKK1,DUSP2,ECM1 (includes EG:100332249),EIF2AK3,EIF5,EPHA2,EPM2AIP1,ERBB2,FADD,FANCG,FBXO5,FLRT2,FNTB,FOSB,FOXA1,GADD4…
Cellular Growth and Proliferation	growth of cells	1.46E-17	3.45E-15	204	ABCC5,ACTN1,ADAR,AHSA1,APBA3,ARHGEF2,ARL1,ATF3,ATF4,BAX,BCAR1,BCAR3,BCCIP,BCL2L1,BCL6,BIRC5,BMP2,BMP4,BRF2,BTG2,C8orf4,CCNA2,CCND1,CD14,CD248,CD44 (includes EG:100330801),CD55,CDC16,CDCA4,CDCA5,CDCA8,CDK2,CDK4,CDK6,CDK7,CDK9,CDKN1A,CDKN2AIP,CDKN2B,CDKN2C,CDT1,CEBPA,CEBPD,CHEK1,CHKA,CLK2,CSE1L,CSNK1D,CTSF,CXCL16,CYR61,DAB2,DCN,DDIT3,DKK1,DLGAP5,DLL1,DNAJA1,DNAJA3,DNAJB1,DNAJB4,DUS2L,DUSP5,ECM1 (in…
Cell Cycle	interphase	7.09E-17	1.59E-14	93	AHR,ANAPC10,ANAPC4,BAX,BCL3,BHLHE40,BIRC5,BMP2,BMP4,BRSK1,BTG2,C13orf15,CCNA2,CCND1,CD44 (includes EG:100330801),CDCA5,CDK1,CDK2,CDK4,CDK6,CDKN1A,CDKN2B,CDKN2C,CEBPA,CEBPD,CENPF,CHEK1,CHKA,CSE1L,CYR61,DCN,DDIT3,DTL,E4F1,EP400,ERBB2,FADD,FANCD2,FBXO5,FGF2,GADD45A,GADD45G,GDF15,HBEGF,HMOX1,HOXA10,ID1,ID3 (includes EG:15903),IGFBP5,IL1B,IL6,ING1,KITLG,KLF4,LEF1,MAD2L1,MCM10 (includes EG:307126),MCM7…
Cancer	colon tumor	4.16E-16	8.94E-14	91	ADAMTS1,AKAP13,ATF3,AXIN2,BAX,BMP2,C10orf54,C17orf81,C1orf63,CA2,CACYBP,CCNA2,CCNB2,CCT4,CDCA5,CDCA7,CDCA8,CDK4,CDK7,CDKN1A,CEP55,CNNM4,CPEB4,DLGAP5,DNAJA1,DNAJB9,DUSP5,EFNB1,ENC1,EXOSC9,FZD4,GDF15,GEMIN4,GINS2,GLRX2,HIST1H4A (includes others),HSPA8,HSPE1,IDI1,IL1B,IL6,IL8,INSIG1,KCNJ8,KIAA0101,KIAA1370,KIFC1,LEAP2,LPAR1,LRP8,LYAR,MAD2L1,MCM10 (includes EG:307126),MCM3,MCM4,MCM5,MELK,MT1E,MUC1,NR…
Gastrointestinal Disease	colon tumor	4.16E-16	8.94E-14	91	ADAMTS1,AKAP13,ATF3,AXIN2,BAX,BMP2,C10orf54,C17orf81,C1orf63,CA2,CACYBP,CCNA2,CCNB2,CCT4,CDCA5,CDCA7,CDCA8,CDK4,CDK7,CDKN1A,CEP55,CNNM4,CPEB4,DLGAP5,DNAJA1,DNAJB9,DUSP5,EFNB1,ENC1,EXOSC9,FZD4,GDF15,GEMIN4,GINS2,GLRX2,HIST1H4A (includes others),HSPA8,HSPE1,IDI1,IL1B,IL6,IL8,INSIG1,KCNJ8,KIAA0101,KIAA1370,KIFC1,LEAP2,LPAR1,LRP8,LYAR,MAD2L1,MCM10 (includes EG:307126),MCM3,MCM4,MCM5,MELK,MT1E,MUC1,NR…
Cancer	colon cancer	4.60E-16	9.44E-14	90	ADAMTS1,AKAP13,ATF3,AXIN2,BAX,BMP2,C10orf54,C17orf81,C1orf63,CA2,CACYBP,CCNA2,CCNB2,CCT4,CDCA5,CDCA7,CDCA8,CDK4,CDK7,CDKN1A,CEP55,CNNM4,CPEB4,DLGAP5,DNAJA1,DNAJB9,DUSP5,EFNB1,ENC1,EXOSC9,FZD4,GEMIN4,GINS2,GLRX2,HIST1H4A (includes others),HSPA8,HSPE1,IDI1,IL1B,IL6,IL8,INSIG1,KCNJ8,KIAA0101,KIAA1370,KIFC1,LEAP2,LPAR1,LRP8,LYAR,MAD2L1,MCM10 (includes EG:307126),MCM3,MCM4,MCM5,MELK,MT1E,MUC1,NRG1 (in…
Gastrointestinal Disease	colon cancer	4.60E-16	9.44E-14	90	ADAMTS1,AKAP13,ATF3,AXIN2,BAX,BMP2,C10orf54,C17orf81,C1orf63,CA2,CACYBP,CCNA2,CCNB2,CCT4,CDCA5,CDCA7,CDCA8,CDK4,CDK7,CDKN1A,CEP55,CNNM4,CPEB4,DLGAP5,DNAJA1,DNAJB9,DUSP5,EFNB1,ENC1,EXOSC9,FZD4,GEMIN4,GINS2,GLRX2,HIST1H4A (includes others),HSPA8,HSPE1,IDI1,IL1B,IL6,IL8,INSIG1,KCNJ8,KIAA0101,KIAA1370,KIFC1,LEAP2,LPAR1,LRP8,LYAR,MAD2L1,MCM10 (includes EG:307126),MCM3,MCM4,MCM5,MELK,MT1E,MUC1,NRG1 (in…
Genetic Disorder	colon cancer	4.60E-16	9.44E-14	90	ADAMTS1,AKAP13,ATF3,AXIN2,BAX,BMP2,C10orf54,C17orf81,C1orf63,CA2,CACYBP,CCNA2,CCNB2,CCT4,CDCA5,CDCA7,CDCA8,CDK4,CDK7,CDKN1A,CEP55,CNNM4,CPEB4,DLGAP5,DNAJA1,DNAJB9,DUSP5,EFNB1,ENC1,EXOSC9,FZD4,GEMIN4,GINS2,GLRX2,HIST1H4A (includes others),HSPA8,HSPE1,IDI1,IL1B,IL6,IL8,INSIG1,KCNJ8,KIAA0101,KIAA1370,KIFC1,LEAP2,LPAR1,LRP8,LYAR,MAD2L1,MCM10 (includes EG:307126),MCM3,MCM4,MCM5,MELK,MT1E,MUC1,NRG1 (in…
Cellular Growth and Proliferation	proliferation of tumor cell lines	8.89E-16	1.75E-13	130	AFAP1,APAF1,AURKB,BAX,BCAR1,BCAR3,BCL2L1,BCL6,BDNF,BEX2,BIRC2,BIRC5,BMP2,BMP4,BUB1 (includes EG:100307076),CASP2,CCL2,CCND1,CD24,CD44 (includes EG:100330801),CDC16,CDK1,CDK2,CDK4,CDK5R1,CDKN1A,CEBPA,CENPB,CHEK1,CHKA,CKS2,CSE1L,CSNK2A2,CYR61,DCN,DDX21,DLL1,DNAJA3,DNAJB4,DTL,E4F1,ECT2,EPHA2,ERBB2,ETS2,ETV6,FABP5,FGF2,GADD45G,GAL,GDF15,GLI2,GPER,HBEGF,HMOX1,HSPB8,ID1,IGBP1,IGFBP5,IKBKG,IL11,IL1B,IL6…
Cell Cycle	mitosis	1.17E-15	2.22E-13	63	AKAP8,ANAPC4,ANLN,AURKB,BIRC5,BMP2,BMP4,BTG3,BUB1 (includes EG:100307076),CCNB1IP1,CDC16,CDC20,CDCA5,CDCA8,CDK1,CDKN1A,CENPF,CHEK1,CKAP2,CSE1L,CYR61,DLGAP5,ERBB2,FBXO5,FGF2,GAS1 (includes EG:14451),HAUS7,HBEGF,IGFBP5,IL11,IL1B,IL6,JUB,KIF11,KIF2C,KITLG,KNTC1,MAD2L1,MAPK7,NDC80,NEK6,NEK7,NKX3-1,NRG1 (includes EG:112400),NUDCD3,NUSAP1,PAFAH1B1,PIM3,PKMYT1,PTHLH,RCC1,RIC8A,SMAD3,SPC25 (includes EG:1…
Cell Death	cell death of breast cancer cell lines	1.47E-15	2.67E-13	64	BAG3,BAX,BCAR1,BCL10,BCL2L1,BEX2,BIRC2,BIRC5,CASP2,CCND1,CD44 (includes EG:100330801),CDK1,CDKN1A,CFLAR,CSE1L,CYB5A,CYR61,DAB2,EPHA2,ERBB2,ETS2,FADD,FBXO32,FGF2,GADD45A,HOXA5,HSPA1A/HSPA1B,HSPA5,HSPB8,HSPD1,IGFBP5,ITCH,KLF5,MAD2L1,MCL1,MOAP1,MST4,MUC1,NRG1 (includes EG:112400),OSGIN1,PARP1,PLK2,PMAIP1,PPARG,PTHLH,RASA1,RGS16,RTKN,SFRP1,SIVA1,SNAI1,SNX33,SOD2,SP1,SST,STAT1,SULF1,TBK1,TFAP2C,TNFRSF…
Cancer	breast cancer	3.02E-15	5.28E-13	149	ABCC5,AKR1C1/AKR1C2,ARFGEF1,ARHGEF2,ASH2L,ATF3,AURKB,BAX,BCAR1,BEX1,BEX2,BHLHE40,BIRC5,BRF2,BTG2,BUB1 (includes EG:100307076),CCL2,CCND1,CD24,CD44 (includes EG:100330801),CDC20,CDCA7,CDH2,CDK1,CDK4,CDKN1A,CEBPA,CEBPD,CHEK1,CLK2,CNDP2,CPEB2,CRYAB,CSE1L,CXXC5,CYR61,DKK1,DUSP2,ECM1 (includes EG:100332249),EIF2AK3,EIF5,EPHA2,EPM2AIP1,ERBB2,FADD,FANCG,FLRT2,FNTB,FOSB,FOXA1,GADD45B,GSTM3,H3F3A/H3F3B,HB…
Reproductive System Disease	breast cancer	3.02E-15	5.28E-13	149	ABCC5,AKR1C1/AKR1C2,ARFGEF1,ARHGEF2,ASH2L,ATF3,AURKB,BAX,BCAR1,BEX1,BEX2,BHLHE40,BIRC5,BRF2,BTG2,BUB1 (includes EG:100307076),CCL2,CCND1,CD24,CD44 (includes EG:100330801),CDC20,CDCA7,CDH2,CDK1,CDK4,CDKN1A,CEBPA,CEBPD,CHEK1,CLK2,CNDP2,CPEB2,CRYAB,CSE1L,CXXC5,CYR61,DKK1,DUSP2,ECM1 (includes EG:100332249),EIF2AK3,EIF5,EPHA2,EPM2AIP1,ERBB2,FADD,FANCG,FLRT2,FNTB,FOSB,FOXA1,GADD45B,GSTM3,H3F3A/H3F3B,HB…
Gene Expression	activation of DNA endogenous promoter	4.86E-15	8.20E-13	109	AHR,ASH2L,ATF4,BCL6,BCL9L,BMP2,BMP4,BRD7,BTF3,CBFB,CCNK,CDK7,CEBPA,CEBPD,CITED2,CSRNP1,CSRNP2,CTDSP1,DNMT1,E2F6,E4F1,ECD,EPC1,FADD,FGF2,FOSB,FOXA1,FOXA3,GATA2,GLI2,GTF2H4,GTF3C2,HCFC1,HEY1,HEY2,HOXA5,IGBP1,IL11,IL6,IRF9,ISL1,IVNS1ABP,KLF5,KLF9,LEF1,MAF,MAFF,MED16,MED20,MED26 (includes EG:306328),MED4 (includes EG:29079),MED6 (includes EG:10001),MED7 (includes EG:171285),MEIS2,MKL1,MLLT10,MNT,MTF1…
Cancer	genital tumor	4.54E-14	7.40E-12	144	ABCC5,ACTC1,AFAP1,AMD1,ANGPT1,APOD,ASS1,ATP1A1,ATXN1,AURKB,BAMBI,BCL10,BHLHE40,BIRC5,BNC1,BTG3,C13orf15,C1R,CALB2,CBFB,CCL2,CCND1,CD24,CD44 (includes EG:100330801),CDH2,CDK1,CDK2,CDK4,CDK6,CDK7,CDK9,CEBPA,CFH,CHEK1,CLDN11,CXCL16,CXXC5,DAB2,DNMT1,DUSP2,ECT2,EFNB2,EPHA2,ERBB2,ETV5,FGF2,FLRT2,FNTB,FOSB,GDF15,GPX3,HIST2H2AA3/HIST2H2AA4,HMGCR,HMOX1,HN1,HOXA5,HSP90AA1,HSP90AB1,ID1,IFNGR2,IL6,IL7R,IL8,I…
Reproductive System Disease	genital tumor	4.54E-14	7.40E-12	144	ABCC5,ACTC1,AFAP1,AMD1,ANGPT1,APOD,ASS1,ATP1A1,ATXN1,AURKB,BAMBI,BCL10,BHLHE40,BIRC5,BNC1,BTG3,C13orf15,C1R,CALB2,CBFB,CCL2,CCND1,CD24,CD44 (includes EG:100330801),CDH2,CDK1,CDK2,CDK4,CDK6,CDK7,CDK9,CEBPA,CFH,CHEK1,CLDN11,CXCL16,CXXC5,DAB2,DNMT1,DUSP2,ECT2,EFNB2,EPHA2,ERBB2,ETV5,FGF2,FLRT2,FNTB,FOSB,GDF15,GPX3,HIST2H2AA3/HIST2H2AA4,HMGCR,HMOX1,HN1,HOXA5,HSP90AA1,HSP90AB1,ID1,IFNGR2,IL6,IL7R,IL8,I…
Cell Death	apoptosis of breast cancer cell lines	2.06E-13	3.24E-11	55	BAG3,BAX,BCAR1,BCL10,BCL2L1,BEX2,BIRC2,BIRC5,CASP2,CCND1,CD44 (includes EG:100330801),CDK1,CDKN1A,CFLAR,CSE1L,CYB5A,CYR61,DAB2,EPHA2,ERBB2,ETS2,FADD,FBXO32,FGF2,GADD45A,HOXA5,HSPA5,HSPB8,HSPD1,IGFBP5,ITCH,KLF5,MCL1,MOAP1,MST4,MUC1,NRG1 (includes EG:112400),OSGIN1,PARP1,PLK2,PMAIP1,PPARG,PTHLH,RASA1,SFRP1,SIVA1,SNAI1,SNX33,SOD2,SST,STAT1,TBK1,TNFRSF10B,TNFRSF1A,TYMS
Reproductive System Disease	gynecological disorder	4.18E-13	6.36E-11	145	ABCC5,ACTC1,AHR,ANAPC10,ASH2L,AURKB,BAX,BCL10,BNC1,C13orf15,CALB2,CCL2,CD24,CD44 (includes EG:100330801),CDH2,CDK1,CDK2,CDK4,CDK6,CDK7,CDK9,CFH,CLDN11,CSE1L,CTSF,CTSH,CXCL16,CXXC5,CYR61,DAB2,DDX24,DKK1,ECT2,EFNB2,EPHA2,ERAL1,ERBB2,ETV5,FGF2,FGFR1OP2,FLRT2,FMN2,FNTB,FOSB,GDF15,GPX3,HIST2H2AA3/HIST2H2AA4,HMGCR,HN1,HOXA5,HSP90AA1,HSP90AB1,IFIT1,IFIT3,IFNGR2,IGFBP5,IL6,IL8,INHBB,KCNK6,KIAA0101,KISS1,…
Cellular Growth and Proliferation	growth of tumor cell lines	6.36E-13	9.38E-11	113	AHSA1,ARHGEF2,ATF3,BAX,BCAR1,BCAR3,BCCIP,BCL2L1,BCL6,BIRC5,BMP2,BMP4,BTG2,CCNA2,CCND1,CD44 (includes EG:100330801),CDCA4,CDCA5,CDCA8,CDK2,CDK4,CDK6,CDKN1A,CDKN2B,CDT1,CEBPA,CEBPD,CSE1L,CYR61,DAB2,DCN,DKK1,DNAJA3,DNAJB4,DUSP5,ECT2,EGR2,ENC1,EPHA2,ERAL1,ERBB2,ERRFI1,ETS2,FGF2,FZD9,GADD45A,GDF15,GLI2,GPER,HBEGF,HBP1,HMGCR,HMOX1,HSPA5,HSPB8,ID1,IGFBP5,IL1B,IL6,IL8,KCNH1,KIF20A,KISS1,KITLG,KLF2,KLF4,L…
Cellular Development	growth of tumor cell lines	6.36E-13	9.38E-11	113	AHSA1,ARHGEF2,ATF3,BAX,BCAR1,BCAR3,BCCIP,BCL2L1,BCL6,BIRC5,BMP2,BMP4,BTG2,CCNA2,CCND1,CD44 (includes EG:100330801),CDCA4,CDCA5,CDCA8,CDK2,CDK4,CDK6,CDKN1A,CDKN2B,CDT1,CEBPA,CEBPD,CSE1L,CYR61,DAB2,DCN,DKK1,DNAJA3,DNAJB4,DUSP5,ECT2,EGR2,ENC1,EPHA2,ERAL1,ERBB2,ERRFI1,ETS2,FGF2,FZD9,GADD45A,GDF15,GLI2,GPER,HBEGF,HBP1,HMGCR,HMOX1,HSPA5,HSPB8,ID1,IGFBP5,IL1B,IL6,IL8,KCNH1,KIF20A,KISS1,KITLG,KLF2,KLF4,L…
Cancer	adenocarcinoma	3.00E-12	4.29E-10	92	ADAMTS1,ALDH1B1,ANGPT1,AURKB,BCL10,BNC1,C13orf15,C1S,CALB2,CCNA2,CCNB2,CCND1,CD14,CD24,CDC20,CDCA5,CDK1,CDK2,CDK4,CDK6,CDK7,CDK9,CFH,CKS2,CSE1L,CXXC5,DAB2,ECT2,EFNB2,ERBB2,FGF2,FLRT2,FOXA3,GABBR2,GADD45B,GAS1 (includes EG:14451),GPX3,HIST2H2AA3/HIST2H2AA4,HMGCR,HN1,HSP90AA1,HSP90AB1,IGFBP5,INHBB,KCNK2,KCNK6,KLF2,KLF9,LRP8,MMP12,MRGPRF,MUC1,NR2F2,OSR2,PCNA,PDGFRA,POLE2,POR,PPARG,PTGER2,PTGS1,RACGA…
Cancer	hematological neoplasia	5.88E-12	8.17E-10	114	APBA3,ARHGAP1,ARID5B,ASXL1,AURKB,BAX,BCL10,BCL2L1,BCL3,BCL6,BCLAF1,BIRC5,BTG1,BTG2,CCND1,CD14,CD24,CD44 (includes EG:100330801),CD55,CD59 (includes EG:25407),CDC20,CDK1,CDK2,CDK4,CDK6,CDK7,CDK9,CDKN1A,CDKN2B,CEBPA,CFLAR,CHEK1,CLK1,CSE1L,CYR61,DKK1,DUSP5,E2F2,EPHA2,ERBB2,ETV6,FADD,FAM46C,FGF2,FNTB,GADD45A,GADD45B,GATA2,GTF2B,HLX,HMGCR,HMOX1,HSP90AA1,HSP90AB1,IDH1,IKBKG,IL1B,IL6,ITGB5,LPP,MCL1,MCM6…
Hematological Disease	hematological neoplasia	5.88E-12	8.17E-10	114	APBA3,ARHGAP1,ARID5B,ASXL1,AURKB,BAX,BCL10,BCL2L1,BCL3,BCL6,BCLAF1,BIRC5,BTG1,BTG2,CCND1,CD14,CD24,CD44 (includes EG:100330801),CD55,CD59 (includes EG:25407),CDC20,CDK1,CDK2,CDK4,CDK6,CDK7,CDK9,CDKN1A,CDKN2B,CEBPA,CFLAR,CHEK1,CLK1,CSE1L,CYR61,DKK1,DUSP5,E2F2,EPHA2,ERBB2,ETV6,FADD,FAM46C,FGF2,FNTB,GADD45A,GADD45B,GATA2,GTF2B,HLX,HMGCR,HMOX1,HSP90AA1,HSP90AB1,IDH1,IKBKG,IL1B,IL6,ITGB5,LPP,MCL1,MCM6…
Cancer	prostatic tumor	1.74E-11	2.35E-09	97	ACTC1,AFAP1,AMD1,ANGPT1,APOD,ASS1,ATP1A1,ATXN1,AURKB,BAMBI,BHLHE40,BIRC5,BTG3,C1R,CBFB,CCND1,CD24,CD44 (includes EG:100330801),CDH2,CDK1,CDK2,CDK4,CDK6,CDK7,CDK9,CEBPA,CFH,CHEK1,CLDN11,CXCL16,DUSP2,EPHA2,ERBB2,ETV5,FNTB,GDF15,GPX3,HMGCR,HMOX1,HSP90AA1,HSP90AB1,ID1,IL6,IL7R,ITGB5,KCNK2,KCNS3,LEF1,MCL1,MCM2,MCM5,MCM7,MUC1,PARP1,PCNA,PDE5A,PDGFRA,PDS5B,PITX2,PLAUR,PLGLB1/PLGLB2,POR,PPARG,PTGS1,RCAN2…
Reproductive System Disease	prostatic tumor	1.74E-11	2.35E-09	97	ACTC1,AFAP1,AMD1,ANGPT1,APOD,ASS1,ATP1A1,ATXN1,AURKB,BAMBI,BHLHE40,BIRC5,BTG3,C1R,CBFB,CCND1,CD24,CD44 (includes EG:100330801),CDH2,CDK1,CDK2,CDK4,CDK6,CDK7,CDK9,CEBPA,CFH,CHEK1,CLDN11,CXCL16,DUSP2,EPHA2,ERBB2,ETV5,FNTB,GDF15,GPX3,HMGCR,HMOX1,HSP90AA1,HSP90AB1,ID1,IL6,IL7R,ITGB5,KCNK2,KCNS3,LEF1,MCL1,MCM2,MCM5,MCM7,MUC1,PARP1,PCNA,PDE5A,PDGFRA,PDS5B,PITX2,PLAUR,PLGLB1/PLGLB2,POR,PPARG,PTGS1,RCAN2…
Cell Cycle	arrest in interphase	2.17E-11	2.85E-09	55	BHLHE40,BIRC5,BMP2,BMP4,BTG2,CCNA2,CCND1,CD44 (includes EG:100330801),CDK1,CDK2,CDK4,CDKN1A,CDKN2B,CEBPA,CEBPD,CHEK1,CHKA,CSE1L,CYR61,DCN,DDIT3,E4F1,EP400,ERBB2,FADD,FBXO5,FGF2,GADD45A,GDF15,HOXA10,IGFBP5,IL1B,IL6,ING1,KLF4,MAD2L1,NRG1 (includes EG:112400),OSGIN1,PITX2,PLAUR,PPARG,PPM1A,PPP2CB,PTGES3,REV1 (includes EG:316344),RXRA,SP1,SSTR1,STRADA,TCP1,TP53BP1,TXNIP,TYMS,XPC,YWHAG
Cancer	prostate cancer	3.56E-11	4.54E-09	95	ACTC1,AFAP1,AMD1,ANGPT1,APOD,ASS1,ATP1A1,ATXN1,AURKB,BAMBI,BHLHE40,BIRC5,BTG3,C1R,CBFB,CCND1,CD24,CD44 (includes EG:100330801),CDH2,CDK1,CDK2,CDK4,CDK6,CDK7,CDK9,CEBPA,CFH,CLDN11,CXCL16,DUSP2,EPHA2,ERBB2,ETV5,FNTB,GDF15,GPX3,HMGCR,HMOX1,HSP90AA1,HSP90AB1,ID1,IL6,IL7R,ITGB5,KCNK2,KCNS3,LEF1,MCL1,MCM2,MCM5,MCM7,MUC1,PARP1,PCNA,PDE5A,PDGFRA,PDS5B,PITX2,PLAUR,PLGLB1/PLGLB2,POR,PPARG,RCAN2,RELB,RNASEL…
Genetic Disorder	prostate cancer	3.56E-11	4.54E-09	95	ACTC1,AFAP1,AMD1,ANGPT1,APOD,ASS1,ATP1A1,ATXN1,AURKB,BAMBI,BHLHE40,BIRC5,BTG3,C1R,CBFB,CCND1,CD24,CD44 (includes EG:100330801),CDH2,CDK1,CDK2,CDK4,CDK6,CDK7,CDK9,CEBPA,CFH,CLDN11,CXCL16,DUSP2,EPHA2,ERBB2,ETV5,FNTB,GDF15,GPX3,HMGCR,HMOX1,HSP90AA1,HSP90AB1,ID1,IL6,IL7R,ITGB5,KCNK2,KCNS3,LEF1,MCL1,MCM2,MCM5,MCM7,MUC1,PARP1,PCNA,PDE5A,PDGFRA,PDS5B,PITX2,PLAUR,PLGLB1/PLGLB2,POR,PPARG,RCAN2,RELB,RNASEL…
Reproductive System Disease	prostate cancer	3.56E-11	4.54E-09	95	ACTC1,AFAP1,AMD1,ANGPT1,APOD,ASS1,ATP1A1,ATXN1,AURKB,BAMBI,BHLHE40,BIRC5,BTG3,C1R,CBFB,CCND1,CD24,CD44 (includes EG:100330801),CDH2,CDK1,CDK2,CDK4,CDK6,CDK7,CDK9,CEBPA,CFH,CLDN11,CXCL16,DUSP2,EPHA2,ERBB2,ETV5,FNTB,GDF15,GPX3,HMGCR,HMOX1,HSP90AA1,HSP90AB1,ID1,IL6,IL7R,ITGB5,KCNK2,KCNS3,LEF1,MCL1,MCM2,MCM5,MCM7,MUC1,PARP1,PCNA,PDE5A,PDGFRA,PDS5B,PITX2,PLAUR,PLGLB1/PLGLB2,POR,PPARG,RCAN2,RELB,RNASEL…
Cell Cycle	interphase of tumor cell lines	4.56E-11	5.67E-09	59	AHR,BAX,BHLHE40,BMP2,BTG2,CCNA2,CCND1,CDK1,CDK2,CDK4,CDK6,CDKN1A,CDKN2B,CEBPA,CEBPD,CHEK1,CHKA,CSE1L,CYR61,DCN,DDIT3,ERBB2,FADD,FGF2,GADD45A,GDF15,HMOX1,HOXA10,IGFBP5,IL1B,IL6,KITLG,KLF4,MAD2L1,MCM10 (includes EG:307126),MEIS2,MT1A,MXD1,MYB,NRG1 (includes EG:112400),NRIP1,OSGIN1,PITX2,PLAUR,PPP2CB,PTGES3,REV1 (includes EG:316344),RXRA,SNX33,SOX9,SP1,SSTR1,STAT1,SULF1,TCP1,TP53BP1,TYMS,XPC,YWHAG
Cancer	head and neck cancer	8.53E-11	1.03E-08	92	ADAMTS1,ATIC,BAX,BCCIP,BIRC5,CCND1,CD24,CD44 (includes EG:100330801),CDK1,CDK4,CDK6,CDKN1A,CDKN2B,CDKN2C,CENPB,CLEC2D,CLK2,CXCL16,DNMT1,ECE2,ECM1 (includes EG:100332249),ECT2,EFNB2,ENC1,EPHA2,ERBB2,FABP5,FADD,FANCD2,FGF2,FNTB,GABBR2,GDF15,HBEGF,HMGCR,HSP90AA1,HSP90AB1,HSPA5,IGFBP5,IL6,IL8,ING1,INSIG1,ITGB5,KHDRBS3,KISS1,LPAR1,MAP3K8,MARCKS,MCL1,MCM2,MCM7,MUC1,NEK6,OGFR,PARP1,PCNA,PDE5A,PDGFRA,PGF…
Cancer	metastatic colorectal cancer	1.00E-10	1.19E-08	43	AKR1C1/AKR1C2,ANGPTL2,ANPEP,BEX1,C1R,CCL2,CD248,CDH2,CDKN2C,CEBPD,CPA4,DKK1,DLGAP5,ERBB2,FLRT2,GCH1,GDF15,GREM2,HMOX1,HOXA10,IGFBP5,IL6,JAG1,KCNK2,KIF20A,MAFB,MEIS1,MLPH,MSX1,NUAK1,PBK,PITX2,PPAP2B,PRRX1,PRRX2,QPCT,RGS4,RRM2,SLC16A3,TNFRSF11B,TYMS,VEGFA,VEGFC
Gastrointestinal Disease	metastatic colorectal cancer	1.00E-10	1.19E-08	43	AKR1C1/AKR1C2,ANGPTL2,ANPEP,BEX1,C1R,CCL2,CD248,CDH2,CDKN2C,CEBPD,CPA4,DKK1,DLGAP5,ERBB2,FLRT2,GCH1,GDF15,GREM2,HMOX1,HOXA10,IGFBP5,IL6,JAG1,KCNK2,KIF20A,MAFB,MEIS1,MLPH,MSX1,NUAK1,PBK,PITX2,PPAP2B,PRRX1,PRRX2,QPCT,RGS4,RRM2,SLC16A3,TNFRSF11B,TYMS,VEGFA,VEGFC
Cell Death	cell death of epithelial cells	1.07E-10	1.24E-08	52	APAF1,BAX,BCL10,BCL2L1,BCL6,BIRC2,BIRC5,CASP2,CD44 (includes EG:100330801),CFLAR,CNNM4,CRYAB,E2F6,EP400,ERN1,FADD,FGF2,GPR37,HSPA5,HSPB8,HSPD1,IKBKG,IL1B,IL8,IP6K2,ITCH,MAP3K8,MCL1,MOAP1,NAMPT,NDUFAB1,NRG1 (includes EG:112400),PLAUR,PPARG,PPM1A,PPP1R15A,PRKAA1,PTK2 (includes EG:14083),RFXANK,RGS4,RNF216,SERPINF1,SFRP1,SIRT4,SRXN1,STK4,TICAM2,TMEFF2,TNFRSF10B,TNFRSF1A,TRIM39,ZNF622
Cell Death	cell death of epithelial cell lines	4.05E-10	4.55E-08	45	BAX,BCL10,BCL2L1,BCL6,BIRC2,BIRC5,CASP2,CD44 (includes EG:100330801),CFLAR,CNNM4,CRYAB,E2F6,ERN1,FADD,FGF2,GPR37,HSPA5,HSPB8,HSPD1,IKBKG,IP6K2,ITCH,MAP3K8,MCL1,MOAP1,NAMPT,NDUFAB1,NRG1 (includes EG:112400),PPARG,PPM1A,PPP1R15A,PRKAA1,RFXANK,RGS4,RNF216,SERPINF1,SIRT4,SRXN1,STK4,TICAM2,TMEFF2,TNFRSF10B,TNFRSF1A,TRIM39,ZNF622
Cell Cycle	arrest in mitosis	4.30E-10	4.73E-08	17	AURKB,BIRC5,BUB1 (includes EG:100307076),CDKN1A,CHEK1,CKAP2,CSE1L,FBXO5,KNTC1,MAD2L1,NEK6,NEK7,NUDCD3,PAFAH1B1,RIC8A,TCP1,ZWINT
Cell Death	cell death of organ	4.69E-10	5.04E-08	61	APAF1,BAX,BCL10,BCL2L1,BCL6,BIRC2,BIRC5,BMP2,BMP4,C8orf4,CASP2,CD44 (includes EG:100330801),CDH2,CDKN1A,CFLAR,CNNM4,E2F6,EP400,ERN1,ETS2,FADD,FGF2,GPR37,HSPA1A/HSPA1B,HSPA5,HSPB8,IKBKG,IL1B,IL8,IP6K2,ITCH,MAP3K8,MCL1,MOAP1,NAMPT,NDUFAB1,NGF,NRG1 (includes EG:112400),PLAUR,PPARG,PPM1A,PPP1R15A,PRKAA1,RFXANK,RGS4,RNF216,SDHA (includes EG:157074),SIRT4,SNCAIP,SOD2,SP1,SP3,SRXN1,STK4,TICAM2,TMEFF2,TN…
Cancer	lymphomagenesis	5.91E-10	6.20E-08	58	AURKB,BCL10,BCL2L1,BCL3,BCL6,BIRC5,BTG1,BTG2,CCND1,CD44 (includes EG:100330801),CDK2,CDK4,CDK6,CDK7,CDK9,CDKN1A,CFLAR,CHEK1,CSE1L,CYR61,DUSP5,EPHA2,FNTB,GADD45A,GADD45B,IL6,MCL1,MCM6,MNT,NAV3,NEK6,PCNA,PDGFRA,PIM2,PNP,POLE2,POR,PPARG,PRIM1,RGS16,RNF213,RRM1,RRM2,SAMD9,SGK1,STK17B,TNFAIP3,TNFRSF10B,TOP2A,TUBB,TUBB2A,TUBB2B,TUBB6,TUBE1,TUBG1,TXLNA,TYMS,VEGFA
Hematological Disease	lymphomagenesis	5.91E-10	6.20E-08	58	AURKB,BCL10,BCL2L1,BCL3,BCL6,BIRC5,BTG1,BTG2,CCND1,CD44 (includes EG:100330801),CDK2,CDK4,CDK6,CDK7,CDK9,CDKN1A,CFLAR,CHEK1,CSE1L,CYR61,DUSP5,EPHA2,FNTB,GADD45A,GADD45B,IL6,MCL1,MCM6,MNT,NAV3,NEK6,PCNA,PDGFRA,PIM2,PNP,POLE2,POR,PPARG,PRIM1,RGS16,RNF213,RRM1,RRM2,SAMD9,SGK1,STK17B,TNFAIP3,TNFRSF10B,TOP2A,TUBB,TUBB2A,TUBB2B,TUBB6,TUBE1,TUBG1,TXLNA,TYMS,VEGFA
Cell Death	cell death of cancer cells	7.52E-10	7.72E-08	35	ANPEP,APAF1,ATXN2,BAX,BCL2L1,BDNF,BIRC5,CASP2,CD24,CDC45,CDKN1A,CFLAR,DDIT3,EIF2AK3,ERBB2,FADD,HMOX1,HSPB8,IL6,IL8,KITLG,LPAR1,MAD2L1,MCL1,MCM2,MUC1,NR4A2,PARP1,PHLDA1,PMAIP1,SFRP1,TNFRSF10B,VEGFA,VEGFC,ZNF622
Cell Cycle	arrest in interphase of tumor cell lines	9.65E-10	9.70E-08	44	BHLHE40,BMP2,BTG2,CCNA2,CCND1,CDK1,CDK2,CDK4,CDKN1A,CDKN2B,CEBPA,CEBPD,CHEK1,CHKA,CSE1L,CYR61,DCN,DDIT3,ERBB2,FADD,FGF2,GADD45A,GDF15,HOXA10,IGFBP5,IL1B,IL6,KLF4,MAD2L1,NRG1 (includes EG:112400),OSGIN1,PITX2,PLAUR,PPP2CB,PTGES3,REV1 (includes EG:316344),RXRA,SP1,SSTR1,TCP1,TP53BP1,TYMS,XPC,YWHAG
Gene Expression	binding of DNA	9.92E-10	9.77E-08	59	BMP2,BRF2,BTG2,CCND1,CDK1,CDKN1A,CEBPA,CFLAR,DNAJB1,ERBB2,ETS2,FADD,FGF2,GTF2B,HEY1,HEY2,HNRNPC,HOXA10,HSPA1A/HSPA1B,ID1,ID3 (includes EG:15903),IKBKG,IL11,IL1B,IL6,ING1,IP6K2,LMCD1,MYB,NFIC,NFKBIZ,NGF,NR2C2AP,NRG1 (includes EG:112400),PARP1,PCNA,PELI1,PIAS4,POLG (includes EG:100150924),POR,PPARG,RUNX1,RXRA,SERPINC1,SERPINF1,SOCS1,SOCS2,SOD2,SOX9,SP1,SREBF1,STAT1,SUV39H1,TAC1,TNFAIP3,TRADD,VEGFA,…
Cancer	non-Hodgkin's disease	1.17E-09	1.13E-07	53	AURKB,BCL10,BCL2L1,BCL3,BCL6,BIRC5,BTG1,BTG2,CDK2,CDK4,CDK6,CDK7,CDK9,CFLAR,CHEK1,CSE1L,CYR61,DUSP5,EPHA2,FNTB,GADD45A,GADD45B,IL6,MNT,NAV3,NEK6,PCNA,PDGFRA,PIM2,PNP,POLE2,POR,PPARG,PRIM1,RGS16,RNF213,RRM1,RRM2,SAMD9,SGK1,STK17B,TNFAIP3,TNFRSF10B,TOP2A,TUBB,TUBB2A,TUBB2B,TUBB6,TUBE1,TUBG1,TXLNA,TYMS,VEGFA
Hematological Disease	non-Hodgkin's disease	1.17E-09	1.13E-07	53	AURKB,BCL10,BCL2L1,BCL3,BCL6,BIRC5,BTG1,BTG2,CDK2,CDK4,CDK6,CDK7,CDK9,CFLAR,CHEK1,CSE1L,CYR61,DUSP5,EPHA2,FNTB,GADD45A,GADD45B,IL6,MNT,NAV3,NEK6,PCNA,PDGFRA,PIM2,PNP,POLE2,POR,PPARG,PRIM1,RGS16,RNF213,RRM1,RRM2,SAMD9,SGK1,STK17B,TNFAIP3,TNFRSF10B,TOP2A,TUBB,TUBB2A,TUBB2B,TUBB6,TUBE1,TUBG1,TXLNA,TYMS,VEGFA
Cell Death	cell death of tumor cells	1.85E-09	1.75E-07	38	ANPEP,APAF1,ATXN2,BAX,BCL2L1,BDNF,BIRC5,CASP2,CD24,CDC45,CDK2,CDKN1A,CFLAR,DDIT3,EIF2AK3,ERBB2,FADD,HBEGF,HMOX1,HSPB8,IL6,IL8,JAG1,KITLG,LPAR1,MAD2L1,MCL1,MCM2,MUC1,NR4A2,PARP1,PHLDA1,PMAIP1,SFRP1,TNFRSF10B,VEGFA,VEGFC,ZNF622
Cancer	uterine cancer	2.11E-09	1.95E-07	86	ACTC1,AHR,ANAPC10,ASH2L,AURKB,BCL10,CD24,CDH2,CDK1,CDK2,CDK4,CDK6,CDK7,CDK9,CFH,CLDN11,CSE1L,CTSF,CTSH,CYR61,DDX24,DKK1,ERAL1,ERBB2,ETV5,FGF2,HSP90AA1,HSP90AB1,IFIT1,IFIT3,IGFBP5,IL6,IL8,KLF2,KLF9,KPNA3,MAF,MCM2,MCM7,MMP10,MMP12,MRGPRF,NDUFV2,NOL7,NR2F2,OSR2,PCCA,PCNA,PDE5A,PDGFRA,PDK4,PDS5B,PHLDA2,POLE2,POR,PPARG,PSMC3IP,RPE,RRM1,RRM2,RXRA,SERPINC1,SFRP1,SLC7A1,SMAD5,SNCAIP,SOCS2,SOX9,SSTR1,STAM…
Reproductive System Disease	uterine cancer	2.11E-09	1.95E-07	86	ACTC1,AHR,ANAPC10,ASH2L,AURKB,BCL10,CD24,CDH2,CDK1,CDK2,CDK4,CDK6,CDK7,CDK9,CFH,CLDN11,CSE1L,CTSF,CTSH,CYR61,DDX24,DKK1,ERAL1,ERBB2,ETV5,FGF2,HSP90AA1,HSP90AB1,IFIT1,IFIT3,IGFBP5,IL6,IL8,KLF2,KLF9,KPNA3,MAF,MCM2,MCM7,MMP10,MMP12,MRGPRF,NDUFV2,NOL7,NR2F2,OSR2,PCCA,PCNA,PDE5A,PDGFRA,PDK4,PDS5B,PHLDA2,POLE2,POR,PPARG,PSMC3IP,RPE,RRM1,RRM2,RXRA,SERPINC1,SFRP1,SLC7A1,SMAD5,SNCAIP,SOCS2,SOX9,SSTR1,STAM…
Cell Cycle	S phase	2.16E-09	1.96E-07	36	BHLHE40,C13orf15,CCNA2,CCND1,CDK1,CDKN1A,CHEK1,E4F1,ERBB2,FANCD2,FBXO5,FGF2,HBEGF,HMOX1,ID1,ID3 (includes EG:15903),IL1B,IL6,MCM10 (includes EG:307126),MCM7,MEIS2,MXD1,NRG1 (includes EG:112400),NRIP1,OSGIN1,PPARG,RCC1,REV1 (includes EG:316344),SMARCA4,SOX9,SSTR1,SULF1,TIMELESS,TP53BP1,TXNL4B,TYMS
Cancer	metastasis	2.64E-09	2.31E-07	67	AKR1C1/AKR1C2,ANGPTL2,ANPEP,BEX1,C1R,CCL2,CD248,CD44 (includes EG:100330801),CDH2,CDKN2C,CEBPD,CPA4,CSE1L,DKK1,DLGAP5,EPHA2,ERBB2,FLRT2,FNTB,GABRE,GCH1,GDF15,GREM2,HMGCR,HMOX1,HOXA10,HSP90AA1,HSP90AB1,IGFBP5,IL6,JAG1,KCNK2,KIF20A,MAFB,MEIS1,MLPH,MSX1,MUC1,NUAK1,PARP1,PBK,PDGFRA,PITX2,PLAUR,POLE2,POR,PPAP2B,PRRX1,PRRX2,PTK2 (includes EG:14083),QPCT,RGS4,RRM1,RRM2,SLC16A3,SMAD3,SSTR1,TNFRSF10B,TNFR…
Cancer	lymphoid cancer	2.64E-09	2.31E-07	64	AURKB,BCL10,BCL2L1,BCL3,BCL6,BIRC5,BTG1,BTG2,CCND1,CD44 (includes EG:100330801),CDK1,CDK2,CDK4,CDK6,CDK7,CDK9,CDKN1A,CFLAR,CHEK1,CSE1L,CXCL16,CYR61,DUSP5,EPHA2,FNTB,GADD45A,GADD45B,HSP90AA1,HSP90AB1,IL6,ITGB5,MCL1,MCM6,MNT,NAV3,NEK6,PCNA,PDGFRA,PIM2,PNP,POLE2,POR,PPARG,PRIM1,RGS16,RNF213,RRM1,RRM2,RXRA,SAMD9,SGK1,STK17B,TNFAIP3,TNFRSF10B,TOP2A,TUBB,TUBB2A,TUBB2B,TUBB6,TUBE1,TUBG1,TXLNA,TYMS,VEGFA
Cancer	lymphatic node tumor	3.43E-09	2.95E-07	54	AURKB,BCL10,BCL2L1,BCL3,BCL6,BIRC5,BTG1,BTG2,CDK2,CDK4,CDK6,CDK7,CDK9,CFLAR,CHEK1,CSE1L,CYR61,DUSP5,EPHA2,FNTB,GADD45A,GADD45B,IL6,MCM6,MNT,NAV3,NEK6,PCNA,PDGFRA,PIM2,PNP,POLE2,POR,PPARG,PRIM1,RGS16,RNF213,RRM1,RRM2,SAMD9,SGK1,STK17B,TNFAIP3,TNFRSF10B,TOP2A,TUBB,TUBB2A,TUBB2B,TUBB6,TUBE1,TUBG1,TXLNA,TYMS,VEGFA
Cell Cycle	arrest in interphase of breast cancer cell lines	3.65E-09	3.08E-07	18	BHLHE40,BTG2,CCND1,CDK1,CDKN1A,CHEK1,DCN,ERBB2,FADD,GDF15,HOXA10,IGFBP5,IL1B,IL6,NRG1 (includes EG:112400),OSGIN1,RXRA,TYMS
Cell Cycle	cell division process of chromosomes	4.18E-09	3.47E-07	33	AURKB,BIRC5,BOD1,BUB1 (includes EG:100307076),CCNA2,CCNB2,CDCA8,CDK7,CDKN1A,CEBPD,CENPF,CKAP2,CLK1,DCLK2,DSN1 (includes EG:100002916),ECT2,EIF2AK3,ERBB2,KIF2C,MAD2L1,MST4,NDC80,NEK6,NUDCD3,NUSAP1,RCC1,RIOK3,RLF,SMC2,SPC25 (includes EG:100144563),SUV39H1,TOP2A,ZWINT
Cell Cycle	mitosis of tumor cell lines	8.55E-09	6.96E-07	24	BIRC5,BMP2,BMP4,CDC20,CDCA8,CDK1,CDKN1A,CHEK1,CSE1L,DLGAP5,FBXO5,IL6,JUB,MAD2L1,MAPK7,NEK6,NEK7,NRG1 (includes EG:112400),NUDCD3,PKMYT1,RIC8A,SPC25 (includes EG:100144563),TCP1,TOP2A
Cell Cycle	interphase of breast cancer cell lines	1.37E-08	1.08E-06	22	BHLHE40,BTG2,CCND1,CDK1,CDKN1A,CHEK1,DCN,ERBB2,FADD,GDF15,HOXA10,IGFBP5,IL1B,IL6,NRG1 (includes EG:112400),NRIP1,OSGIN1,RXRA,SNX33,SOX9,SULF1,TYMS
Cancer	benign tumor	1.38E-08	1.08E-06	79	ACTC1,AHR,ALDH1B1,ANAPC10,ASH2L,ATP1A1,AURKB,BCL10,BDNF,BMP4,CCNC,CCND1,CD24,CFH,CLDN11,CYR61,DDX24,E2F2,EPHA2,ERAL1,ERBB2,FGF2,FH,FNTB,GAL,GPR37,HMGCR,HSP90AB1,IFIT1,IFIT3,IGFBP5,IL6,JAG1,KIF1B,KITLG,KPNA3,LPAR1,MAF,MLX,NDUFV2,NOL7,NSL1 (includes EG:25936),PCCA,PCNA,PDE5A,PDGFRA,PDK4,PDS5B,PHLDA2,PLAUR,PPARG,PRDX6,PSMC3IP,PTGS1,RAB23,RCAN2,RPE,RPL9,RRM2,RXRA,SFRP1,SLC7A1,SMAD5,SOD2,SSTR1,STAMBP,…
Cell Cycle	cell cycle progression of tumor cell lines	1.54E-08	1.19E-06	37	AHR,BAX,BCAR1,BCL6,BIRC5,BMP4,CASP2,CCNA2,CCND1,CD44 (includes EG:100330801),CDK2,CDK4,CDK6,CDKN1A,CDKN2C,CEBPA,CKAP2,CKS2,CSE1L,CSNK2A2,DNAJB4,ERBB2,HBEGF,HMOX1,IL6,MELK,MLF1,NGF,NRG1 (includes EG:112400),PCNA,PLAGL1,PPARG,PPP2R3A,RRAD,RRM1,SMARCA4,TCP1
Cancer	squamous-cell carcinoma	1.65E-08	1.26E-06	43	ATP1B1,BTG2,CD24,CD44 (includes EG:100330801),CD55,CDCA5,DUSP2,ECT2,ENPP1,EPHA2,ERBB2,FNTB,GAS1 (includes EG:14451),GRINL1A,HSP90AA1,HSP90AB1,IFIT1,ING1,KISS1,KLF5,MBNL1,MBNL2,MMP12,NKTR,OGFR,PCNA,PDE5A,PDGFRA,PTGS1,RGS12,RNF6,SERTAD1,SFRP1,SLC2A1,SOCS2,TNFRSF10B,TOP2A,TUBB2A,TUBE1,TUBG1,TYMS,UPP1,WNT5A
Reproductive System Disease	endometriosis	2.05E-08	1.53E-06	67	AHR,ANGPT1,ATF4,ATP1B1,BCL6,BIRC5,C13orf15,C1S,CAV2,CCL2,CCNA2,CCNK,CDK1,CITED2,CTSH,CYR61,DCN,DKK1,DNMT1,DUSP2,ELL2,ENPP1,ERBB2,ERRFI1,FGF2,GPX3,GREM1,HSPA1A/HSPA1B,HYAL2,ID1,IL11,IL6,IL8,KIF20A,MAP3K8,MARCKS,MCM4,MCM7,MT1E,MT1G,MUC1,MXD1,NRIP1,OGFR,OVGP1,PBK,PDGFRA,PFKFB3,PLAUR,PLK2,PPAP2B,PPARG,PTGER2,PTGS1,PTP4A1,RELB,RFC2,RRM1,SAT1,SGK1,SLC2A3,SMAD6,STC1,TNFRSF1A,TOP2A,VEGFA,VEGFC
Cancer	squamous cell tumor	2.08E-08	1.53E-06	45	ATP1B1,BTG2,CD24,CD44 (includes EG:100330801),CD55,CDCA5,DUSP2,ECT2,ENPP1,EPHA2,ERBB2,FNTB,GAS1 (includes EG:14451),GRINL1A,HSP90AA1,HSP90AB1,HSPA5,IFIT1,ING1,KISS1,KLF5,MBNL1,MBNL2,MMP12,NKTR,OGFR,PCNA,PDE5A,PDGFRA,PTGS1,RGS12,RNF6,SERTAD1,SFRP1,SLC2A1,SOCS2,SOD2,TNFRSF10B,TOP2A,TUBB2A,TUBE1,TUBG1,TYMS,UPP1,WNT5A
Cancer	liver cancer	3.22E-08	2.34E-06	66	ABCC5,AKR1C1/AKR1C2,ANLN,ASF1B,AXIN2,BZW1,CA2,CD44 (includes EG:100330801),CDK1,CDK2,CDK4,CDK6,CDK7,CDK9,CDKN1A,CDKN2B,CKS2,CSE1L,DDX3X,DKK1,ECT2,EPHA2,ERBB2,FAIM,FAM83D,FOXQ1,GOT1,GSTO1,HMGCR,HNRPDL,HSP90AA1,HSP90AB1,HSPA5,HSPA8,IL6,IL8,LPAR1,MT2A,NUSAP1,OGFR,PAQR4,PDGFRA,PLK4,POLG (includes EG:100150924),PPARG,PPP2CB,PTGS1,RELB,RRM2,SFRP1,SLC2A1,SOCS1,SOX9,SQSTM1,SSTR1,TACSTD2,TOP2A,TUBB2A,TUBE…
Gastrointestinal Disease	liver cancer	3.22E-08	2.34E-06	66	ABCC5,AKR1C1/AKR1C2,ANLN,ASF1B,AXIN2,BZW1,CA2,CD44 (includes EG:100330801),CDK1,CDK2,CDK4,CDK6,CDK7,CDK9,CDKN1A,CDKN2B,CKS2,CSE1L,DDX3X,DKK1,ECT2,EPHA2,ERBB2,FAIM,FAM83D,FOXQ1,GOT1,GSTO1,HMGCR,HNRPDL,HSP90AA1,HSP90AB1,HSPA5,HSPA8,IL6,IL8,LPAR1,MT2A,NUSAP1,OGFR,PAQR4,PDGFRA,PLK4,POLG (includes EG:100150924),PPARG,PPP2CB,PTGS1,RELB,RRM2,SFRP1,SLC2A1,SOCS1,SOX9,SQSTM1,SSTR1,TACSTD2,TOP2A,TUBB2A,TUBE…
Hepatic System Disease	liver cancer	3.22E-08	2.34E-06	66	ABCC5,AKR1C1/AKR1C2,ANLN,ASF1B,AXIN2,BZW1,CA2,CD44 (includes EG:100330801),CDK1,CDK2,CDK4,CDK6,CDK7,CDK9,CDKN1A,CDKN2B,CKS2,CSE1L,DDX3X,DKK1,ECT2,EPHA2,ERBB2,FAIM,FAM83D,FOXQ1,GOT1,GSTO1,HMGCR,HNRPDL,HSP90AA1,HSP90AB1,HSPA5,HSPA8,IL6,IL8,LPAR1,MT2A,NUSAP1,OGFR,PAQR4,PDGFRA,PLK4,POLG (includes EG:100150924),PPARG,PPP2CB,PTGS1,RELB,RRM2,SFRP1,SLC2A1,SOCS1,SOX9,SQSTM1,SSTR1,TACSTD2,TOP2A,TUBB2A,TUBE…
Cancer	liver tumor	3.32E-08	2.38E-06	67	ABCC5,AKR1C1/AKR1C2,ANLN,ASF1B,AXIN2,BZW1,CA2,CD44 (includes EG:100330801),CDK1,CDK2,CDK4,CDK6,CDK7,CDK9,CDKN1A,CDKN2B,CKS2,CSE1L,DDX3X,DKK1,ECT2,EPHA2,ERBB2,FAIM,FAM83D,FOXQ1,GOT1,GSTO1,HMGCR,HNRPDL,HSP90AA1,HSP90AB1,HSPA5,HSPA8,IL6,IL8,LPAR1,MT2A,NUSAP1,OGFR,PAQR4,PDGFRA,PLAUR,PLK4,POLG (includes EG:100150924),PPARG,PPP2CB,PTGS1,RELB,RRM2,SFRP1,SLC2A1,SOCS1,SOX9,SQSTM1,SSTR1,TACSTD2,TOP2A,TUBB2…
Gastrointestinal Disease	liver tumor	3.32E-08	2.38E-06	67	ABCC5,AKR1C1/AKR1C2,ANLN,ASF1B,AXIN2,BZW1,CA2,CD44 (includes EG:100330801),CDK1,CDK2,CDK4,CDK6,CDK7,CDK9,CDKN1A,CDKN2B,CKS2,CSE1L,DDX3X,DKK1,ECT2,EPHA2,ERBB2,FAIM,FAM83D,FOXQ1,GOT1,GSTO1,HMGCR,HNRPDL,HSP90AA1,HSP90AB1,HSPA5,HSPA8,IL6,IL8,LPAR1,MT2A,NUSAP1,OGFR,PAQR4,PDGFRA,PLAUR,PLK4,POLG (includes EG:100150924),PPARG,PPP2CB,PTGS1,RELB,RRM2,SFRP1,SLC2A1,SOCS1,SOX9,SQSTM1,SSTR1,TACSTD2,TOP2A,TUBB2…
Cancer	ovarian cancer	3.64E-08	2.56E-06	71	ABCC5,BCL10,BNC1,C13orf15,CALB2,CCL2,CD24,CD44 (includes EG:100330801),CDK4,CFH,CXCL16,CXXC5,DAB2,ECT2,EFNB2,EPHA2,ERBB2,FGF2,FLRT2,FNTB,FOSB,GDF15,GPX3,HIST2H2AA3/HIST2H2AA4,HN1,HOXA5,HSP90AA1,HSP90AB1,IFNGR2,IL6,IL8,KCNK6,KIAA0101,KISS1,LAMA5,LRP8,MSX1,MUC1,OVGP1,PARP1,PDGFRA,PDS5B,PLAUR,POLE2,POR,PTGER2,PTGS1,PTK2 (includes EG:14083),RACGAP1,RRM1,RRM2,S100P,SERPINC1,SLC16A3,SRSF1,SSTR1,STAT1,S…
Reproductive System Disease	ovarian cancer	3.64E-08	2.56E-06	71	ABCC5,BCL10,BNC1,C13orf15,CALB2,CCL2,CD24,CD44 (includes EG:100330801),CDK4,CFH,CXCL16,CXXC5,DAB2,ECT2,EFNB2,EPHA2,ERBB2,FGF2,FLRT2,FNTB,FOSB,GDF15,GPX3,HIST2H2AA3/HIST2H2AA4,HN1,HOXA5,HSP90AA1,HSP90AB1,IFNGR2,IL6,IL8,KCNK6,KIAA0101,KISS1,LAMA5,LRP8,MSX1,MUC1,OVGP1,PARP1,PDGFRA,PDS5B,PLAUR,POLE2,POR,PTGER2,PTGS1,PTK2 (includes EG:14083),RACGAP1,RRM1,RRM2,S100P,SERPINC1,SLC16A3,SRSF1,SSTR1,STAT1,S…
Cell Cycle	G2/M phase	4.60E-08	3.20E-06	29	ANAPC10,ANAPC4,BIRC5,BRSK1,CCNA2,CCND1,CDK1,CDK2,CDKN1A,CDKN2B,CEBPA,CHEK1,CSE1L,DTL,FADD,GADD45A,GADD45G,IGFBP5,IL6,MAD2L1,MELK,MYB,NEK6,NRG1 (includes EG:112400),PPM1A,SULF1,TP53BP1,TPD52L1,TXNL4B
Cellular Growth and Proliferation	proliferation of brain cancer cell lines	5.13E-08	3.51E-06	20	BIRC5,BMP4,CCL2,CDKN1A,CYR61,DLL1,DTL,ECT2,ERBB2,FGF2,IL8,JAG1,KCNH1,LEF1,PDGFRA,PLAUR,SLC9A3R1,SST,SYNM,VEGFA
Cell Cycle	G2 phase	5.54E-08	3.74E-06	34	ANAPC10,ANAPC4,BAX,BIRC5,BRSK1,CCNA2,CCND1,CDK1,CDK2,CDKN1A,CDKN2B,CEBPA,CENPF,CHEK1,CSE1L,DTL,FADD,GADD45A,GADD45G,IGFBP5,IL6,MAD2L1,MELK,MYB,NEK6,NRG1 (includes EG:112400),PPM1A,PPP2CB,SULF1,TCP1,TP53BP1,TPD52L1,TXNL4B,XPC
Cell Death	cell survival	5.70E-08	3.75E-06	100	ADK,AKAP13,ALPK2,ANLN,ARAP3,ATF4,BAX,BCKDK,BCL2L1,BCL6,BDNF,BEX2,BIRC5,BMP2,BMP4,CA2,CALB2,CASP2,CCL2,CCNA2,CCND1,CD44 (includes EG:100330801),CDH2,CDK2,CDK6,CDKN1A,CEBPD,CFLAR,CHEK1,CHKA,DUSP10,DUSP5,DYRK3,ERBB2,ETS2,FADD,FANCD2,FANCG,FGF2,GDF15,HBEGF,HERPUD1,HMOX1,HOXA5,HSPA5,IL1B,IL6,IL8,IRF9,ITCH,KIFC1,KITLG,KLF5,MAD2L1,MAP3K8,MCL1,NDC80,NGF,NRG1 (includes EG:112400),NUAK1,PARP1,PBK,PCNA,PDRG…
Cell Death	apoptosis of epithelial cell lines	5.71E-08	3.75E-06	33	BAX,BCL10,BCL2L1,BCL6,BIRC2,BIRC5,CASP2,CD44 (includes EG:100330801),CFLAR,CRYAB,E2F6,FADD,HSPA5,HSPB8,HSPD1,ITCH,MAP3K8,MCL1,NRG1 (includes EG:112400),PPM1A,PPP1R15A,PRKAA1,RFXANK,RGS4,RNF216,SERPINF1,SRXN1,STK4,TMEFF2,TNFRSF10B,TNFRSF1A,TRIM39,ZNF622
Cell Death	cell death of cervical cancer cell lines	5.88E-08	3.81E-06	50	BAX,BCL2L1,BIRC2,BIRC5,CASP2,CDC20,CDK1,CDKN1A,CDKN2C,CEBPA,CHEK1,CSNK2A2,DDIT3,DNAJA3,FADD,GADD45A,GADD45B,GADD45G,HSPA1A/HSPA1B,IL1B,IL6,MAD2L1,MCL1,MCM10 (includes EG:307126),MSX1,MUC1,NEK6,NEK7,NFKBIZ,NR4A2,NUDCD3,PARP1,RAD51C,RASA1,RNF34,SGK1,SNX33,SOD2,SPC25 (includes EG:100144563),SQSTM1,STAT1,STK4,TBK1,TCP1,TNFRSF10B,TNFRSF1A,TNFRSF21,TOP2A,TTC5,TTK
Cell Death	cell death of embryonic cell lines	9.03E-08	5.76E-06	40	BAX,BCL10,BCL2L1,BCL6,BIRC2,BIRC5,CASP2,CD44 (includes EG:100330801),CFLAR,CNNM4,E2F6,ERN1,FADD,GPR37,HSPA5,IKBKG,IP6K2,ITCH,MAP3K8,MCL1,MOAP1,NAMPT,NDUFAB1,NRG1 (includes EG:112400),PPARG,PPM1A,PPP1R15A,PRKAA1,RFXANK,RGS4,RNF216,SIRT4,SRXN1,STK4,TICAM2,TMEFF2,TNFRSF10B,TNFRSF1A,TRIM39,ZNF622
Embryonic Development	cell death of embryonic cell lines	9.03E-08	5.76E-06	40	BAX,BCL10,BCL2L1,BCL6,BIRC2,BIRC5,CASP2,CD44 (includes EG:100330801),CFLAR,CNNM4,E2F6,ERN1,FADD,GPR37,HSPA5,IKBKG,IP6K2,ITCH,MAP3K8,MCL1,MOAP1,NAMPT,NDUFAB1,NRG1 (includes EG:112400),PPARG,PPM1A,PPP1R15A,PRKAA1,RFXANK,RGS4,RNF216,SIRT4,SRXN1,STK4,TICAM2,TMEFF2,TNFRSF10B,TNFRSF1A,TRIM39,ZNF622
Cancer	hematologic cancer	1.25E-07	7.85E-06	85	APBA3,ARHGAP1,ARID5B,ASXL1,AURKB,BAX,BCL2L1,BCL3,BCL6,BCLAF1,CCND1,CD14,CD24,CD55,CD59 (includes EG:25407),CDC20,CDK1,CDK2,CDK4,CDK6,CDK7,CDK9,CDKN1A,CDKN2B,CEBPA,CHEK1,CLK1,DKK1,E2F2,EPHA2,ERBB2,ETV6,FADD,FAM46C,FGF2,FNTB,GATA2,GTF2B,HLX,HMGCR,HMOX1,HSP90AA1,HSP90AB1,IDH1,IKBKG,IL1B,ITGB5,LPP,MKL1,MLF1,MLLT10,MN1,MYB,NEXN,ORC5 (includes EG:26429),PARP1,PCNA,PDE5A,PDGFRA,PLAGL2,PNP,POLE2,POR,PRIM…
Hematological Disease	hematologic cancer	1.25E-07	7.85E-06	85	APBA3,ARHGAP1,ARID5B,ASXL1,AURKB,BAX,BCL2L1,BCL3,BCL6,BCLAF1,CCND1,CD14,CD24,CD55,CD59 (includes EG:25407),CDC20,CDK1,CDK2,CDK4,CDK6,CDK7,CDK9,CDKN1A,CDKN2B,CEBPA,CHEK1,CLK1,DKK1,E2F2,EPHA2,ERBB2,ETV6,FADD,FAM46C,FGF2,FNTB,GATA2,GTF2B,HLX,HMGCR,HMOX1,HSP90AA1,HSP90AB1,IDH1,IKBKG,IL1B,ITGB5,LPP,MKL1,MLF1,MLLT10,MN1,MYB,NEXN,ORC5 (includes EG:26429),PARP1,PCNA,PDE5A,PDGFRA,PLAGL2,PNP,POLE2,POR,PRIM…
Cellular Function and Maintenance	endoplasmic reticulum stress response	1.31E-07	8.15E-06	16	ATF4,DDIT3,DNAJA1,DNAJB1,DNAJB4,EIF2AK3,ERN1,HSPA1A/HSPA1B,HSPA1L,HSPA5,HSPA6,HSPD1,HSPE1,HSPH1,WFS1,YOD1
Cancer	ductal carcinoma	1.33E-07	8.15E-06	24	ARFGEF1,ASH2L,BIRC5,BRF2,CCND1,CDH2,CDKN1A,ECM1 (includes EG:100332249),EPHA2,FADD,HSPB8,MAP1LC3B,MT1E,MT1G,MT2A,MUC1,NEFM,PCNA,SAT2,SERPINF1,STAU2,TPM1 (includes EG:22003),TYMS,ZNF703
Reproductive System Disease	ductal carcinoma	1.33E-07	8.15E-06	24	ARFGEF1,ASH2L,BIRC5,BRF2,CCND1,CDH2,CDKN1A,ECM1 (includes EG:100332249),EPHA2,FADD,HSPB8,MAP1LC3B,MT1E,MT1G,MT2A,MUC1,NEFM,PCNA,SAT2,SERPINF1,STAU2,TPM1 (includes EG:22003),TYMS,ZNF703
Cell Death	cell death of kidney cells	2.10E-07	1.27E-05	42	BAX,BCL10,BCL2L1,BCL6,BIRC2,BIRC5,CASP2,CD44 (includes EG:100330801),CFLAR,CNNM4,E2F6,ERN1,FADD,GPR37,HSPA1A/HSPA1B,HSPA5,IKBKG,IP6K2,ITCH,MAP3K8,MCL1,MOAP1,NAMPT,NDUFAB1,NRG1 (includes EG:112400),PPARG,PPM1A,PPP1R15A,PRKAA1,RFXANK,RGS4,RNF216,SIRT4,SOD2,SRXN1,STK4,TICAM2,TMEFF2,TNFRSF10B,TNFRSF1A,TRIM39,ZNF622
Cell Death	cell viability	2.28E-07	1.36E-05	39	ANLN,BAX,BCL2L1,BCL6,BIRC5,BMP2,BMP4,CCL2,CCNA2,CDH2,CDKN1A,CFLAR,ERBB2,FADD,FGF2,GDF15,HMOX1,HSPA5,IL6,KITLG,MAP3K8,MCL1,NDC80,NGF,NRG1 (includes EG:112400),PARP1,PLAUR,RRM1,RRM2,SOCS1,SOD2,SQSTM1,STC1,TAF1B,TBK1,TCP1,TNFAIP3,TRADD,VEGFA
Cellular Growth and Proliferation	proliferation of breast cancer cell lines	2.60E-07	1.54E-05	39	BCAR1,BCAR3,BEX2,BUB1 (includes EG:100307076),CCND1,CDC16,CDK1,CDKN1A,CEBPA,CHKA,CSE1L,DCN,EPHA2,ERBB2,ETS2,FGF2,GPER,HSPB8,ID1,IL6,KCNH1,KISS1,KLF5,MYB,NGF,NRG1 (includes EG:112400),NRP1 (includes EG:18186),OSGIN1,PBK,PDS5B,PPARG,PTHLH,PTK2 (includes EG:14083),RARRES3,RGS16,SAT1,SOD2,UBE2I,VEGFA
Drug Metabolism	binding of progesterone	2.65E-07	1.54E-05	6	DNAJA1,DNAJB1,HSP90AB1,HSPA1L,PTGES3,STIP1
Endocrine System Development and Function	binding of progesterone	2.65E-07	1.54E-05	6	DNAJA1,DNAJB1,HSP90AB1,HSPA1L,PTGES3,STIP1
Lipid Metabolism	binding of progesterone	2.65E-07	1.54E-05	6	DNAJA1,DNAJB1,HSP90AB1,HSPA1L,PTGES3,STIP1
Small Molecule Biochemistry	binding of progesterone	2.65E-07	1.54E-05	6	DNAJA1,DNAJB1,HSP90AB1,HSPA1L,PTGES3,STIP1
Gene Expression	binding of protein binding site	2.92E-07	1.68E-05	33	BMP2,CCND1,CEBPA,ETS2,FGF2,HEY1,HEY2,HOXA10,HSPA1A/HSPA1B,ID1,ID3 (includes EG:15903),IL11,IL1B,IL6,IP6K2,LMCD1,MYB,NFIC,NFKBIZ,NGF,NRG1 (includes EG:112400),PIAS4,POR,RUNX1,RXRA,SERPINF1,SOD2,SOX9,STAT1,SUV39H1,TAC1,TRADD,VEGFA
Cell Death	cell death of kidney cell lines	3.05E-07	1.74E-05	41	BAX,BCL10,BCL2L1,BCL6,BIRC2,BIRC5,CASP2,CD44 (includes EG:100330801),CFLAR,CNNM4,E2F6,ERN1,FADD,GPR37,HSPA1A/HSPA1B,HSPA5,IKBKG,IP6K2,ITCH,MAP3K8,MCL1,MOAP1,NAMPT,NDUFAB1,NRG1 (includes EG:112400),PPARG,PPM1A,PPP1R15A,PRKAA1,RFXANK,RGS4,RNF216,SIRT4,SRXN1,STK4,TICAM2,TMEFF2,TNFRSF10B,TNFRSF1A,TRIM39,ZNF622
Cellular Movement	invasion of cells	3.13E-07	1.76E-05	69	ANPEP,ARAP3,ATF3,BCAR1,BCAR3,BDNF,BMP4,CCL2,CCND1,CD14,CD24,CD44 (includes EG:100330801),CDH2,CSE1L,CSK,CTSK,DAB2,DCN,DKK1,DNAJB4,ECT2,EPHA2,ERBB2,ETS2,FABP5,FGF2,FXYD5,GDF15,HBEGF,HBP1,HMOX1,ID1,IL8,INHBB,KISS1,KLF4,LEF1,LPAR1,MARCKS,MUC1,NGF,NRG1 (includes EG:112400),NRP1 (includes EG:18186),NUAK1,PLAUR,PPARG,PRKAA1,PTGER2,PTGES3,PTK2 (includes EG:14083),RGS4,RHOG,RRM2,S100P,S1PR3,SDCBP,SFRP1,S…
Cancer	bladder tumor	3.76E-07	2.09E-05	16	CDK4,ERBB2,HSP90AA1,HSP90AB1,HSPA1A/HSPA1B,KIF20B,POLE2,POR,RRM1,RRM2,TOP2A,TUBB2A,TUBE1,TUBG1,UBE2C,XPC
Renal and Urological Disease	bladder tumor	3.76E-07	2.09E-05	16	CDK4,ERBB2,HSP90AA1,HSP90AB1,HSPA1A/HSPA1B,KIF20B,POLE2,POR,RRM1,RRM2,TOP2A,TUBB2A,TUBE1,TUBG1,UBE2C,XPC
Cellular Movement	invasion of tumor cell lines	3.88E-07	2.13E-05	61	ARAP3,ATF3,BCAR1,BCAR3,BDNF,BMP4,CD24,CD44 (includes EG:100330801),CDH2,CSE1L,CSK,CTSK,DAB2,DCN,DKK1,DNAJB4,ECT2,EPHA2,ERBB2,ETS2,FABP5,FXYD5,GDF15,HBEGF,HBP1,HMOX1,ID1,IL8,INHBB,KISS1,KLF4,LEF1,LPAR1,MARCKS,MUC1,NGF,NRG1 (includes EG:112400),NRP1 (includes EG:18186),NUAK1,PLAUR,PPARG,PRKAA1,PTGER2,PTGES3,PTK2 (includes EG:14083),RRM2,S100P,S1PR3,SDCBP,SFRP1,SLC2A1,SLC9A3R1,SNAI1,SOD2,SP1,SST,SUL…
Cancer	non-small cell lung cancer	4.11E-07	2.23E-05	53	ANLN,AURKB,BAX,BIRC5,CCNA2,CCND1,CD24,CD44 (includes EG:100330801),CDCA8,CDK4,CDK6,CDKN1A,CEBPA,CTSK,DNAJB4,ECT2,EPHA2,ERBB2,FADD,FNTB,HSP90AA1,HSP90AB1,ID1,ITGB5,MAFB,MCM2,MUC1,NT5E,PDE5A,PDGFRA,PGF,PLAUR,POLE2,PPARG,PTGS1,RRAD,RRM1,RRM2,RXRA,S100P,SERPINC1,SOX9,SRSF1,SSR2,STAT1,TOP3B,TUBB2A,TUBE1,TUBG1,TYMS,UNG,VEGFA,VEGFC
Genetic Disorder	non-small cell lung cancer	4.11E-07	2.23E-05	53	ANLN,AURKB,BAX,BIRC5,CCNA2,CCND1,CD24,CD44 (includes EG:100330801),CDCA8,CDK4,CDK6,CDKN1A,CEBPA,CTSK,DNAJB4,ECT2,EPHA2,ERBB2,FADD,FNTB,HSP90AA1,HSP90AB1,ID1,ITGB5,MAFB,MCM2,MUC1,NT5E,PDE5A,PDGFRA,PGF,PLAUR,POLE2,PPARG,PTGS1,RRAD,RRM1,RRM2,RXRA,S100P,SERPINC1,SOX9,SRSF1,SSR2,STAT1,TOP3B,TUBB2A,TUBE1,TUBG1,TYMS,UNG,VEGFA,VEGFC
Respiratory Disease	non-small cell lung cancer	4.11E-07	2.23E-05	53	ANLN,AURKB,BAX,BIRC5,CCNA2,CCND1,CD24,CD44 (includes EG:100330801),CDCA8,CDK4,CDK6,CDKN1A,CEBPA,CTSK,DNAJB4,ECT2,EPHA2,ERBB2,FADD,FNTB,HSP90AA1,HSP90AB1,ID1,ITGB5,MAFB,MCM2,MUC1,NT5E,PDE5A,PDGFRA,PGF,PLAUR,POLE2,PPARG,PTGS1,RRAD,RRM1,RRM2,RXRA,S100P,SERPINC1,SOX9,SRSF1,SSR2,STAT1,TOP3B,TUBB2A,TUBE1,TUBG1,TYMS,UNG,VEGFA,VEGFC
Cancer	lung tumor	4.23E-07	2.27E-05	80	ALDH1B1,ANGPT1,ANLN,AURKB,BAX,BCL2L1,BIRC5,CCNA2,CCNB2,CCND1,CD24,CD44 (includes EG:100330801),CDC20,CDCA5,CDCA8,CDK1,CDK4,CDK6,CDKN1A,CEBPA,CKS2,CTSK,DNAJB4,ECT2,EPHA2,ERBB2,FADD,FNTB,FOXA3,GADD45B,GAS1 (includes EG:14451),HSP90AA1,HSP90AB1,ID1,ITGB5,KEAP1,MAFB,MAP3K8,MCM2,MMP12,MUC1,NEK6,NT5E,PCNA,PDE5A,PDGFRA,PGF,PLAUR,POLE2,POR,PPARG,PTGS1,RCC1,RFC4,RPL9,RRAD,RRM1,RRM2,RXRA,S100P,SERPINC1,SFR…
Respiratory Disease	lung tumor	4.23E-07	2.27E-05	80	ALDH1B1,ANGPT1,ANLN,AURKB,BAX,BCL2L1,BIRC5,CCNA2,CCNB2,CCND1,CD24,CD44 (includes EG:100330801),CDC20,CDCA5,CDCA8,CDK1,CDK4,CDK6,CDKN1A,CEBPA,CKS2,CTSK,DNAJB4,ECT2,EPHA2,ERBB2,FADD,FNTB,FOXA3,GADD45B,GAS1 (includes EG:14451),HSP90AA1,HSP90AB1,ID1,ITGB5,KEAP1,MAFB,MAP3K8,MCM2,MMP12,MUC1,NEK6,NT5E,PCNA,PDE5A,PDGFRA,PGF,PLAUR,POLE2,POR,PPARG,PTGS1,RCC1,RFC4,RPL9,RRAD,RRM1,RRM2,RXRA,S100P,SERPINC1,SFR…
Cancer	gonadal tumor	4.57E-07	2.42E-05	72	ABCC5,BCL10,BNC1,C13orf15,CALB2,CCL2,CD24,CD44 (includes EG:100330801),CDK4,CFH,CXCL16,CXXC5,DAB2,DNMT1,ECT2,EFNB2,EPHA2,ERBB2,FGF2,FLRT2,FNTB,FOSB,GDF15,GPX3,HIST2H2AA3/HIST2H2AA4,HN1,HOXA5,HSP90AA1,HSP90AB1,IFNGR2,IL6,IL8,KCNK6,KIAA0101,KISS1,LAMA5,LRP8,MSX1,MUC1,OVGP1,PARP1,PDGFRA,PDS5B,PLAUR,POLE2,POR,PTGER2,PTGS1,PTK2 (includes EG:14083),RACGAP1,RRM1,RRM2,S100P,SERPINC1,SLC16A3,SRSF1,SSTR1,S…
Reproductive System Disease	gonadal tumor	4.57E-07	2.42E-05	72	ABCC5,BCL10,BNC1,C13orf15,CALB2,CCL2,CD24,CD44 (includes EG:100330801),CDK4,CFH,CXCL16,CXXC5,DAB2,DNMT1,ECT2,EFNB2,EPHA2,ERBB2,FGF2,FLRT2,FNTB,FOSB,GDF15,GPX3,HIST2H2AA3/HIST2H2AA4,HN1,HOXA5,HSP90AA1,HSP90AB1,IFNGR2,IL6,IL8,KCNK6,KIAA0101,KISS1,LAMA5,LRP8,MSX1,MUC1,OVGP1,PARP1,PDGFRA,PDS5B,PLAUR,POLE2,POR,PTGER2,PTGS1,PTK2 (includes EG:14083),RACGAP1,RRM1,RRM2,S100P,SERPINC1,SLC16A3,SRSF1,SSTR1,S…
Cell Death	apoptosis of cancer cells	5.17E-07	2.68E-05	26	ANPEP,ATXN2,BAX,BCL2L1,BIRC5,CASP2,CD24,CDC45,CDKN1A,CFLAR,DDIT3,FADD,HSPB8,IL6,LPAR1,MCL1,MCM2,MUC1,NR4A2,PARP1,PHLDA1,PMAIP1,TNFRSF10B,VEGFA,VEGFC,ZNF622
Cellular Growth and Proliferation	proliferation of connective tissue cells	5.17E-07	2.68E-05	26	B4GALT7,BMP2,BMP4,CCL2,CD44 (includes EG:100330801),CDK4,CDK6,CDKN1A,CDKN2B,CSK,FGF2,IGFBP5,IL1B,IL6,IL8,PDE5A,PDGFRA,PLAUR,SERTAD1,SFRP1,SOD2,STC1,TAC1,TNFRSF10B,TNFRSF11B,WNT5A
Cancer	leiomyomatosis	5.26E-07	2.70E-05	48	ACTC1,AHR,ALDH1B1,ANAPC10,ASH2L,AURKB,BCL10,CD24,CFH,CLDN11,CYR61,DDX24,ERAL1,FGF2,FH,HSP90AB1,IFIT1,IFIT3,IGFBP5,KPNA3,MAF,MLX,NDUFV2,NOL7,NSL1 (includes EG:25936),PCCA,PCNA,PDE5A,PDGFRA,PDK4,PDS5B,PHLDA2,PPARG,PSMC3IP,RAB23,RPE,RPL9,RXRA,SFRP1,SLC7A1,SMAD5,SOD2,STAMBP,STX3,TFAP2C,UQCRH,WNT5B,ZDHHC17
Cell Cycle	G1 phase	6.05E-07	3.07E-05	44	AHR,BAX,BCL3,BHLHE40,BIRC5,BMP2,BTG2,CCND1,CDCA5,CDK2,CDK4,CDK6,CDKN1A,CDKN2B,CDKN2C,CEBPD,CYR61,DCN,DDIT3,E4F1,EP400,ERBB2,FBXO5,FGF2,GADD45A,GADD45G,GDF15,HOXA10,IL6,ING1,KLF4,LEF1,MT1A,MXD1,NRG1 (includes EG:112400),PPARG,PTGES3,RCC1,SNX33,SP1,SSTR1,STRADA,TYMS,YWHAG
Cell Cycle	segregation of chromosomes	6.13E-07	3.08E-05	18	AURKB,BUB1 (includes EG:100307076),CCNA2,CCNB2,CENPF,DSN1 (includes EG:100002916),ECT2,KIF2C,NDC80,NEK6,NUDCD3,NUSAP1,RCC1,RIOK3,SMC2,SPC25 (includes EG:100144563),TOP2A,ZWINT
Cellular Assembly and Organization	segregation of chromosomes	6.13E-07	3.08E-05	18	AURKB,BUB1 (includes EG:100307076),CCNA2,CCNB2,CENPF,DSN1 (includes EG:100002916),ECT2,KIF2C,NDC80,NEK6,NUDCD3,NUSAP1,RCC1,RIOK3,SMC2,SPC25 (includes EG:100144563),TOP2A,ZWINT
DNA Replication, Recombination, and Repair	segregation of chromosomes	6.13E-07	3.08E-05	18	AURKB,BUB1 (includes EG:100307076),CCNA2,CCNB2,CENPF,DSN1 (includes EG:100002916),ECT2,KIF2C,NDC80,NEK6,NUDCD3,NUSAP1,RCC1,RIOK3,SMC2,SPC25 (includes EG:100144563),TOP2A,ZWINT
Cellular Growth and Proliferation	growth of breast cancer cell lines	6.55E-07	3.25E-05	34	BCAR1,BCAR3,BCCIP,BIRC5,BTG2,CCND1,CD44 (includes EG:100330801),CEBPD,CSE1L,CYR61,DAB2,EPHA2,ERBB2,FGF2,GDF15,GPER,HBEGF,HBP1,IGFBP5,IL1B,KCNH1,KITLG,NRG1 (includes EG:112400),OSGIN1,PLAUR,RGS16,RRAD,SAT1,SMOX,SOD2,TFAP2C,TNFRSF1A,TPM1 (includes EG:22003),TYMS
Cellular Development	growth of breast cancer cell lines	6.55E-07	3.25E-05	34	BCAR1,BCAR3,BCCIP,BIRC5,BTG2,CCND1,CD44 (includes EG:100330801),CEBPD,CSE1L,CYR61,DAB2,EPHA2,ERBB2,FGF2,GDF15,GPER,HBEGF,HBP1,IGFBP5,IL1B,KCNH1,KITLG,NRG1 (includes EG:112400),OSGIN1,PLAUR,RGS16,RRAD,SAT1,SMOX,SOD2,TFAP2C,TNFRSF1A,TPM1 (includes EG:22003),TYMS
Cell Cycle	G0/G1 phase transition	6.66E-07	3.28E-05	14	BMP4,CCND1,CD44 (includes EG:100330801),CDKN1A,CEBPD,CHKA,IL1B,IL6,KITLG,PITX2,PLAUR,RXRA,SOX9,STAT1
Cell Death	apoptosis of tumor cells	6.93E-07	3.37E-05	29	ANPEP,ATXN2,BAX,BCL2L1,BIRC5,CASP2,CD24,CDC45,CDK2,CDKN1A,CFLAR,DDIT3,FADD,HBEGF,HSPB8,IL6,JAG1,LPAR1,MCL1,MCM2,MUC1,NR4A2,PARP1,PHLDA1,PMAIP1,TNFRSF10B,VEGFA,VEGFC,ZNF622
Cell Death	cell death of fibrosarcoma cell lines	7.18E-07	3.37E-05	16	BAX,BCL2L1,BIRC2,BIRC5,CDKN1A,CFLAR,FADD,NAMPT,NFKBIZ,PMAIP1,SOD2,STAT1,TBK1,TNFRSF10B,TNFRSF1A,TOP2A
Cell Cycle	arrest in cell cycle progression	7.19E-07	3.37E-05	37	AHR,BMP4,CCNA2,CCND1,CDK2,CDK4,CDK6,CDK7,CDKN1A,CDKN2B,CDKN2C,CEBPA,CKAP2,CKS2,E2F2,ERBB2,GADD45A,ID1,ID3 (includes EG:15903),IL12A,IL1B,IL6,IL8,MAD2L1,MELK,MLF1,PLAGL1,PPARG,PPM1D,PPP1R15A,RRAD,RRM1,SMAD3,SMARCA4,STAT1,TCP1,WDR6
Cell Death	cell death of brain cancer cell lines	7.20E-07	3.37E-05	24	BAX,BCL2L1,BIRC2,BIRC5,BMP4,CD59 (includes EG:25407),CDK1,CFLAR,CRYAB,DKK1,DLL1,EEF2K,ERBB2,JAG1,MAPK7,MCL1,NGF,NRP1 (includes EG:18186),PARP1,PMEPA1,SOD2,TNFRSF10B,TNFRSF1A,VEGFA
RNA Post-Transcriptional Modification	processing of RNA	7.21E-07	3.37E-05	41	AARS,ADAT1,AGGF1,CDK7,CLK1,CLK2,CLP1 (includes EG:10978),CPSF3,CSTF3,DDX39B,EFTUD2,EXOSC3,EXOSC7,GEMIN4,GEMIN6,HCFC1,HEATR1,HNRNPD,HNRNPH1,HNRNPR,HNRPDL,INTS9,IVNS1ABP,MBNL1,MBNL2,NOP58,PABPN1,PRPF31,RBM38,RBM4,RP9,RPL14,RPS7,SLU7 (includes EG:10569),SNRPB2,SPOP,SRSF1,SRSF4,SYNCRIP,TSEN2,ZC3H3 (includes EG:223642)
Cellular Development	differentiation of tumor cell lines	7.54E-07	3.49E-05	34	BDNF,BHLHE40,BMP4,BTG2,CCND1,CD14,CDK4,CDK5R1,CDKN1A,CEBPA,CEBPD,CHKA,CTSK,ERBB2,FGF2,FZD9,GREM1,HOXA10,HOXA5,IGFBP5,IL6,KITLG,KLF4,MCL1,MST4,MUC1,MYB,NGF,NRG1 (includes EG:112400),PPARG,RACGAP1,RUNX1,STAT1,TGM2
Cellular Development	differentiation	7.82E-07	3.58E-05	81	AHR,BCL2L1,BCL6,BDNF,BHLHE40,BMP2,BMP4,BTG1,BTG2,CCL2,CCND1,CD14,CDK4,CDK5R1,CDK6,CDKN1A,CDKN2B,CEBPA,CEBPD,CHKA,CTSK,DCN,DKK1,DLL1,DYRK3,ENPP1,ERBB2,ETV6,FGF2,FZD9,GADD45B,GATA2,GLI2,GREM1,HBEGF,HIST1H4A (includes others),HOXA10,HOXA5,ID1,IFRD1,IGFBP5,IL11,IL1B,IL6,IL8,KITLG,KLF4,LEF1,LOR,MAFB,MAL,MCL1,MKL1,MLLT11,MST4,MUC1,MYB,NGF,NRG1 (includes EG:112400),PDE5A,PDGFRA,PGF,PNP,PPARG,PTHLH,RACGA…
Cell Cycle	arrest in mitosis of tumor cell lines	8.04E-07	3.65E-05	11	BIRC5,CDKN1A,CHEK1,CSE1L,FBXO5,MAD2L1,NEK6,NEK7,NUDCD3,RIC8A,TCP1
Cell Death	apoptosis of colon cancer cell lines	8.19E-07	3.69E-05	37	AHSA1,APAF1,ATF3,BAG3,BAX,BCL2L1,BIRC5,CASP2,CDK1,CDKN1A,CFLAR,CKAP2,CSE1L,DDIT3,DTYMK,ERBB2,FADD,FGF2,GADD45A,HOXA5,HSPD1,IL1B,MCL1,MOAP1,MUC1,MYB,NRG1 (includes EG:112400),PARP1,PMEPA1,PPARG,PPP1R15A,RTKN,SGK1,SOX9,STAT1,TGM2,TNFRSF10B
Cell Death	apoptosis of cervical cancer cell lines	8.27E-07	3.69E-05	39	BAX,BCL2L1,BIRC2,BIRC5,CASP2,CDC20,CDK1,CDKN1A,CDKN2C,CEBPA,CSNK2A2,DDIT3,DNAJA3,FADD,GADD45A,GADD45B,GADD45G,IL1B,IL6,MCL1,MCM10 (includes EG:307126),MSX1,MUC1,NEK6,NEK7,NFKBIZ,NR4A2,RASA1,RNF34,SGK1,SNX33,STK4,TBK1,TCP1,TNFRSF10B,TNFRSF1A,TNFRSF21,TTC5,TTK
Cellular Development	differentiation of cells	8.64E-07	3.81E-05	80	AHR,BCL2L1,BCL6,BDNF,BHLHE40,BMP2,BMP4,BTG1,BTG2,CCL2,CCND1,CD14,CDK4,CDK5R1,CDK6,CDKN1A,CDKN2B,CEBPA,CEBPD,CHKA,CTSK,DCN,DKK1,DLL1,DYRK3,ENPP1,ERBB2,ETV6,FGF2,FZD9,GADD45B,GATA2,GLI2,GREM1,HBEGF,HIST1H4A (includes others),HOXA10,HOXA5,ID1,IFRD1,IGFBP5,IL11,IL1B,IL6,IL8,KITLG,KLF4,LEF1,LOR,MAFB,MAL,MCL1,MKL1,MLLT11,MST4,MUC1,MYB,NGF,NRG1 (includes EG:112400),PDE5A,PDGFRA,PGF,PNP,PPARG,PTHLH,RACGA…
Cancer	lung cancer	8.76E-07	3.83E-05	74	ALDH1B1,ANGPT1,ANLN,AURKB,BAX,BIRC5,CCNA2,CCNB2,CCND1,CD24,CD44 (includes EG:100330801),CDC20,CDCA5,CDCA8,CDK1,CDK4,CDK6,CDKN1A,CEBPA,CKS2,CTSK,DNAJB4,ECT2,EPHA2,ERBB2,FADD,FNTB,GADD45B,GAS1 (includes EG:14451),HSP90AA1,HSP90AB1,ID1,ITGB5,MAFB,MAP3K8,MCM2,MMP12,MUC1,NEK6,NT5E,PCNA,PDE5A,PDGFRA,PGF,PLAUR,POLE2,POR,PPARG,PTGS1,RCC1,RFC4,RRAD,RRM1,RRM2,RXRA,S100P,SERPINC1,SOX9,SRSF1,SSR2,STAT1,TNRC6…
Genetic Disorder	lung cancer	8.76E-07	3.83E-05	74	ALDH1B1,ANGPT1,ANLN,AURKB,BAX,BIRC5,CCNA2,CCNB2,CCND1,CD24,CD44 (includes EG:100330801),CDC20,CDCA5,CDCA8,CDK1,CDK4,CDK6,CDKN1A,CEBPA,CKS2,CTSK,DNAJB4,ECT2,EPHA2,ERBB2,FADD,FNTB,GADD45B,GAS1 (includes EG:14451),HSP90AA1,HSP90AB1,ID1,ITGB5,MAFB,MAP3K8,MCM2,MMP12,MUC1,NEK6,NT5E,PCNA,PDE5A,PDGFRA,PGF,PLAUR,POLE2,POR,PPARG,PTGS1,RCC1,RFC4,RRAD,RRM1,RRM2,RXRA,S100P,SERPINC1,SOX9,SRSF1,SSR2,STAT1,TNRC6…
Respiratory Disease	lung cancer	8.76E-07	3.83E-05	74	ALDH1B1,ANGPT1,ANLN,AURKB,BAX,BIRC5,CCNA2,CCNB2,CCND1,CD24,CD44 (includes EG:100330801),CDC20,CDCA5,CDCA8,CDK1,CDK4,CDK6,CDKN1A,CEBPA,CKS2,CTSK,DNAJB4,ECT2,EPHA2,ERBB2,FADD,FNTB,GADD45B,GAS1 (includes EG:14451),HSP90AA1,HSP90AB1,ID1,ITGB5,MAFB,MAP3K8,MCM2,MMP12,MUC1,NEK6,NT5E,PCNA,PDE5A,PDGFRA,PGF,PLAUR,POLE2,POR,PPARG,PTGS1,RCC1,RFC4,RRAD,RRM1,RRM2,RXRA,S100P,SERPINC1,SOX9,SRSF1,SSR2,STAT1,TNRC6…
Cell Cycle	mitosis of cervical cancer cell lines	9.78E-07	4.24E-05	16	BIRC5,CDC20,CDCA8,CSE1L,DLGAP5,FBXO5,JUB,MAD2L1,MAPK7,NEK6,NEK7,NUDCD3,RIC8A,SPC25 (includes EG:100144563),TCP1,TOP2A
Cancer	tumorigenesis of cells	1.12E-06	4.83E-05	29	CCL2,CCND1,CD24,CD44 (includes EG:100330801),CDH2,CDKN1A,CYR61,DKK1,DNAJB4,DUSP2,ECT2,FADD,FGF2,HMOX1,IL6,IL8,ING1,MST4,MUC1,NGF,PDGFRA,PLAUR,PPAP2B,PTK2 (includes EG:14083),RRM1,SERTAD1,SOD2,TXNIP,VEGFA
Cancer	lung adenocarcinoma	1.50E-06	6.37E-05	20	ALDH1B1,ANGPT1,CCNA2,CCNB2,CDC20,CDCA5,CDK1,CKS2,ERBB2,GADD45B,GAS1 (includes EG:14451),MMP12,PCNA,RCC1,RFC4,TNRC6B,TYMS,UBE2C,VEGFC,XPC
Genetic Disorder	lung adenocarcinoma	1.50E-06	6.37E-05	20	ALDH1B1,ANGPT1,CCNA2,CCNB2,CDC20,CDCA5,CDK1,CKS2,ERBB2,GADD45B,GAS1 (includes EG:14451),MMP12,PCNA,RCC1,RFC4,TNRC6B,TYMS,UBE2C,VEGFC,XPC
Respiratory Disease	lung adenocarcinoma	1.50E-06	6.37E-05	20	ALDH1B1,ANGPT1,CCNA2,CCNB2,CDC20,CDCA5,CDK1,CKS2,ERBB2,GADD45B,GAS1 (includes EG:14451),MMP12,PCNA,RCC1,RFC4,TNRC6B,TYMS,UBE2C,VEGFC,XPC
Cell Cycle	G0/G1 phase transition of tumor cell lines	1.51E-06	6.37E-05	12	CCND1,CDKN1A,CEBPD,CHKA,IL1B,IL6,KITLG,PITX2,PLAUR,RXRA,SOX9,STAT1
Cell Death	cell viability of tumor cell lines	1.54E-06	6.42E-05	29	ANLN,BAX,BCL6,BIRC5,BMP2,CCL2,CCNA2,CDH2,CDKN1A,CFLAR,ERBB2,FADD,GDF15,HMOX1,HSPA5,IL6,MCL1,NRG1 (includes EG:112400),PARP1,PLAUR,RRM1,RRM2,SOCS1,SOD2,SQSTM1,STC1,TBK1,TCP1,TRADD
Cancer	tumorigenesis of tumor cell lines	2.23E-06	9.21E-05	24	CCL2,CCND1,CD24,CDH2,CDKN1A,CYR61,DKK1,DNAJB4,DUSP2,ECT2,FADD,FGF2,HMOX1,IL6,IL8,MST4,MUC1,PDGFRA,PLAUR,PPAP2B,SERTAD1,SOD2,TXNIP,VEGFA
Cellular Compromise	cell damage	2.24E-06	9.21E-05	18	ATXN1,BAX,BCL2L1,CFH,DNAJA1,FGF2,HMOX1,HSPA1A/HSPA1B,IL6,NDUFAB1,NGF,OSBPL1A,PRDX6,RACGAP1,SIAH2,SNCAIP,SOD2,SQSTM1
Cell Death	cell death of colon cancer cell lines	2.35E-06	9.57E-05	40	AHSA1,APAF1,ATF3,BAG3,BAX,BCL2L1,BIRC5,CASP2,CDK1,CDKN1A,CFLAR,CKAP2,CSE1L,DDIT3,DTYMK,ERBB2,FADD,FGF2,GADD45A,HOXA5,HSPD1,IL1B,MCL1,MOAP1,MUC1,MYB,NRG1 (includes EG:112400),NUAK1,PARP1,PMEPA1,PPARG,PPP1R15A,RTKN,SGK1,SOX9,STAT1,TGM2,TNFRSF10B,TNFRSF1A,UBE2C
Cell Death	cell death of melanoma cell lines	2.61E-06	1.06E-04	19	BAX,BIRC2,CDKN1A,DDIT3,FGF2,GADD45A,GADD45G,HSPA5,HSPB8,IL8,MCL1,PBK,PKMYT1,PMAIP1,PPP1R15A,SAT1,SMOX,TNFRSF10B,TNFRSF10D
Cell Death	apoptosis of melanoma cell lines	2.85E-06	1.13E-04	18	BAX,BIRC2,CDKN1A,DDIT3,FGF2,GADD45A,GADD45G,HSPA5,HSPB8,MCL1,PBK,PKMYT1,PMAIP1,PPP1R15A,SAT1,SMOX,TNFRSF10B,TNFRSF10D
Cellular Development	maturation of cells	2.85E-06	1.13E-04	18	BIRC5,BMP2,CCND1,CD44 (includes EG:100330801),CD83,CDKN1A,E2F2,HSPA1A/HSPA1B,HSPD1,IL1B,IL6,KITLG,MLF1,NGF,NR4A2,PPARG,STAT1,TNFSF9
Cancer	endocrine gland tumor	3.01E-06	1.18E-04	57	ADAMTS1,AHR,ATP1A1,BIRC5,BMP2,CCND1,CD59 (includes EG:25407),CDH2,CDK4,CDKN1A,CXCL16,CYR61,DKK1,ECM1 (includes EG:100332249),EFNB2,EPHA2,ERBB2,FANCG,FGF2,FNTB,FOXA1,GABBR2,GDF15,HBEGF,IL1B,IL6,KIAA0101,MAP3K8,MCM7,MUC1,NEFM,NPTX2,OGFR,PCNA,PDGFRA,POLE2,POR,PPARG,PTK2 (includes EG:14083),RRM1,RRM2,RXRA,S100P,SERPINF1,SOCS1,SOCS5,SSTR1,TNFRSF10D,TNFSF9,TOP2A,TRIM33,TUBB2A,TUBE1,TUBG1,TYMS,VEGFA,WNT…
Cancer	urinary tract tumor	3.20E-06	1.25E-04	22	AURKB,CDK4,ERBB2,HMGCR,HSP90AA1,HSP90AB1,HSPA1A/HSPA1B,INHBB,KIF20B,MUC1,PDGFRA,POLE2,POR,RRM1,RRM2,SFRP1,TOP2A,TUBB2A,TUBE1,TUBG1,UBE2C,XPC
Renal and Urological Disease	urinary tract tumor	3.20E-06	1.25E-04	22	AURKB,CDK4,ERBB2,HMGCR,HSP90AA1,HSP90AB1,HSPA1A/HSPA1B,INHBB,KIF20B,MUC1,PDGFRA,POLE2,POR,RRM1,RRM2,SFRP1,TOP2A,TUBB2A,TUBE1,TUBG1,UBE2C,XPC
Cancer	bladder carcinoma	3.37E-06	1.30E-04	9	CDK4,ERBB2,HSP90AA1,HSP90AB1,HSPA1A/HSPA1B,KIF20B,POR,TOP2A,UBE2C
Renal and Urological Disease	bladder carcinoma	3.37E-06	1.30E-04	9	CDK4,ERBB2,HSP90AA1,HSP90AB1,HSPA1A/HSPA1B,KIF20B,POR,TOP2A,UBE2C
Cell Death	cell death of carcinoma cell lines	3.53E-06	1.36E-04	28	BAX,BCL2L1,BIRC5,CASP2,CCND1,CDKN2C,CEBPA,CFH,CFLAR,DAPK3,DDIT3,ERBB2,HSPA5,ID3 (includes EG:15903),IL6,JAG1,KLF2,MCL1,NRG1 (includes EG:112400),OSGIN1,PARP1,PMEPA1,RASD1,RRM1,SRSF1,TBK1,TGM2,TNFRSF10B
Cell Death	apoptosis of carcinoma cell lines	3.65E-06	1.38E-04	25	BAX,BCL2L1,BIRC5,CASP2,CCND1,CDKN2C,CEBPA,CFLAR,DAPK3,DDIT3,HSPA5,ID3 (includes EG:15903),IL6,JAG1,KLF2,MCL1,NRG1 (includes EG:112400),OSGIN1,PARP1,PMEPA1,RASD1,RRM1,SRSF1,TBK1,TNFRSF10B
Cancer	sarcoma	3.66E-06	1.38E-04	40	ANGPTL4,AURKB,CDK1,CDK2,CDK4,CDK6,CDK7,CDK9,CDKN1A,CDKN2B,CKS2,CLK2,EPHA2,ERBB2,EXT1,FNTB,GLI2,HSP90AA1,HSP90AB1,IL6,ITGB5,MCL1,PDGFRA,POLE2,POR,PPARG,RRM1,RRM2,RXRA,SERPINC1,SSTR1,ST5,TOP2A,TUBB2A,TUBE1,TUBG1,TYMS,UBE2C,VEGFA,VEGFC
Cell Cycle	checkpoint control	3.68E-06	1.38E-04	14	BUB1 (includes EG:100307076),CDC20,CDK2,CHEK1,FANCD2,FANCG,KNTC1,MAD2L1,MCM7,NDC80,TP53BP1,XPC,ZWILCH,ZWINT
DNA Replication, Recombination, and Repair	checkpoint control	3.68E-06	1.38E-04	14	BUB1 (includes EG:100307076),CDC20,CDK2,CHEK1,FANCD2,FANCG,KNTC1,MAD2L1,MCM7,NDC80,TP53BP1,XPC,ZWILCH,ZWINT
Cellular Growth and Proliferation	growth of lung cancer cell lines	3.86E-06	1.44E-04	22	BAX,BIRC5,CDCA4,CDCA5,CDCA8,CDKN1A,CEBPA,DKK1,DNAJB4,DUSP5,ECT2,ERBB2,ERRFI1,FGF2,FZD9,HMOX1,KITLG,PLAUR,PPARG,RASD1,SLC3A2,UHRF1
Cellular Development	growth of lung cancer cell lines	3.86E-06	1.44E-04	22	BAX,BIRC5,CDCA4,CDCA5,CDCA8,CDKN1A,CEBPA,DKK1,DNAJB4,DUSP5,ECT2,ERBB2,ERRFI1,FGF2,FZD9,HMOX1,KITLG,PLAUR,PPARG,RASD1,SLC3A2,UHRF1
Cell Death	cell death of prostate cancer cell lines	4.06E-06	1.49E-04	31	BAX,BCL2L1,BIRC2,BIRC5,BMP2,CCL2,CDK5R1,CFLAR,DDIT3,ETS2,FADD,GADD45A,GADD45G,GDF15,HBEGF,HSPA1A/HSPA1B,HSPB8,HSPD1,ID1,IGFBP5,IL6,MCL1,NGF,PARP1,PLAUR,PMAIP1,RNASEL,STK4,TNFRSF10B,TNFRSF11B,VEGFC
Cancer	uterine leiomyoma	4.07E-06	1.49E-04	40	ACTC1,AHR,ANAPC10,ASH2L,AURKB,BCL10,CD24,CFH,CLDN11,CYR61,DDX24,ERAL1,FGF2,HSP90AB1,IFIT1,IFIT3,IGFBP5,KPNA3,MAF,NDUFV2,NOL7,PCCA,PCNA,PDE5A,PDK4,PDS5B,PHLDA2,PPARG,PSMC3IP,RPE,RXRA,SFRP1,SLC7A1,SMAD5,STAMBP,STX3,TFAP2C,UQCRH,WNT5B,ZDHHC17
Reproductive System Disease	uterine leiomyoma	4.07E-06	1.49E-04	40	ACTC1,AHR,ANAPC10,ASH2L,AURKB,BCL10,CD24,CFH,CLDN11,CYR61,DDX24,ERAL1,FGF2,HSP90AB1,IFIT1,IFIT3,IGFBP5,KPNA3,MAF,NDUFV2,NOL7,PCCA,PCNA,PDE5A,PDK4,PDS5B,PHLDA2,PPARG,PSMC3IP,RPE,RXRA,SFRP1,SLC7A1,SMAD5,STAMBP,STX3,TFAP2C,UQCRH,WNT5B,ZDHHC17
Cell Death	apoptosis of embryonic cell lines	4.33E-06	1.57E-04	29	BAX,BCL10,BCL2L1,BCL6,BIRC2,BIRC5,CASP2,CD44 (includes EG:100330801),CFLAR,E2F6,FADD,HSPA5,ITCH,MAP3K8,MCL1,NRG1 (includes EG:112400),PPM1A,PPP1R15A,PRKAA1,RFXANK,RGS4,RNF216,SRXN1,STK4,TMEFF2,TNFRSF10B,TNFRSF1A,TRIM39,ZNF622
Embryonic Development	apoptosis of embryonic cell lines	4.33E-06	1.57E-04	29	BAX,BCL10,BCL2L1,BCL6,BIRC2,BIRC5,CASP2,CD44 (includes EG:100330801),CFLAR,E2F6,FADD,HSPA5,ITCH,MAP3K8,MCL1,NRG1 (includes EG:112400),PPM1A,PPP1R15A,PRKAA1,RFXANK,RGS4,RNF216,SRXN1,STK4,TMEFF2,TNFRSF10B,TNFRSF1A,TRIM39,ZNF622
Cell Cycle	S phase of breast cancer cell lines	4.66E-06	1.68E-04	10	CCND1,CDKN1A,IL1B,IL6,NRG1 (includes EG:112400),NRIP1,OSGIN1,SOX9,SULF1,TYMS
DNA Replication, Recombination, and Repair	synthesis of DNA	4.89E-06	1.75E-04	38	BIRC5,BMP4,CCNA2,CDCA4,CDK2,CDK6,CDKN1A,CDKN2B,CDKN2C,CDT1,CHEK1,CYR61,DNMT1,ERBB2,FGF2,GLI2,HBEGF,HSPA8,IGFBP5,IL1B,IL6,IL8,KITLG,KLF2,MAPK7,MCL1,NGF,NRG1 (includes EG:112400),PCNA,PDGFRA,PGF,RFC2,RFC3,RGS4,SMARCA4,TAC1,TFPI2,VEGFA
Cell Death	apoptosis of brain cancer cell lines	5.05E-06	1.79E-04	19	BAX,BCL2L1,BIRC5,BMP4,CDK1,CFLAR,CRYAB,DKK1,DLL1,EEF2K,ERBB2,JAG1,MAPK7,MCL1,NGF,NRP1 (includes EG:18186),PMEPA1,TNFRSF10B,VEGFA
Cell Cycle	G2/M phase transition	5.21E-06	1.84E-04	16	ANAPC10,ANAPC4,BIRC5,CCNA2,CCND1,CDK1,CDK2,CDKN1A,CDKN2B,CEBPA,GADD45A,GADD45G,MAD2L1,MELK,NRG1 (includes EG:112400),TPD52L1
Cellular Function and Maintenance	transmembrane potential of mitochondria	5.56E-06	1.95E-04	26	APAF1,BAX,BCL2L1,BIRC5,CASP2,CDKN1A,CFLAR,DDIT3,DNAJB1,FADD,HERPUD1,HSPA4,HSPD1,IL6,ITSN1,MCL1,MOAP1,NDUFAB1,PAPOLA,PARP1,PMAIP1,PPARG,SOD2,SRXN1,SST,TNFRSF10B
Cell Morphology	transmembrane potential of mitochondria	5.56E-06	1.95E-04	26	APAF1,BAX,BCL2L1,BIRC5,CASP2,CDKN1A,CFLAR,DDIT3,DNAJB1,FADD,HERPUD1,HSPA4,HSPD1,IL6,ITSN1,MCL1,MOAP1,NDUFAB1,PAPOLA,PARP1,PMAIP1,PPARG,SOD2,SRXN1,SST,TNFRSF10B
Cardiovascular System Development and Function	vasculogenesis	6.67E-06	2.31E-04	35	ADAMTS1,AGGF1,ANGPT1,ANGPTL4,ANPEP,BMP2,BMP4,CCL2,CCL26,CD44 (includes EG:100330801),CDH2,CYR61,DCN,DKK1,ECM1 (includes EG:100332249),EFNB2,EGR3,ERBB2,FGF2,HEY1,HMOX1,ID1,IL1B,IL8,NR2F2,NRG1 (includes EG:112400),PGF,RGS4,S1PR3,SERPINC1,SERPINF1,STC1,VEGFA,VEGFC,WNT5A
Organismal Development	vasculogenesis	6.67E-06	2.31E-04	35	ADAMTS1,AGGF1,ANGPT1,ANGPTL4,ANPEP,BMP2,BMP4,CCL2,CCL26,CD44 (includes EG:100330801),CDH2,CYR61,DCN,DKK1,ECM1 (includes EG:100332249),EFNB2,EGR3,ERBB2,FGF2,HEY1,HMOX1,ID1,IL1B,IL8,NR2F2,NRG1 (includes EG:112400),PGF,RGS4,S1PR3,SERPINC1,SERPINF1,STC1,VEGFA,VEGFC,WNT5A
Cellular Movement	cell movement	6.75E-06	2.31E-04	120	AFAP1,ANGPT1,ANGPTL4,ANPEP,BCAR1,BCAR3,BCL10,BDNF,BMP2,BMP4,BTG2,CCL2,CCL26,CCND1,CD24,CD44 (includes EG:100330801),CDH2,CDK1,CDK7,CITED2,CKLF,CSE1L,CSK,CXCL16,CYR61,DAB2,DCN,DKK1,DNAJA3,DNAJB4,ECT2,EFNB1,EFNB2,EPHA2,ERBB2,ETV5,FADD,FGF2,GDF15,HBEGF,HEY1,HMGCR,HMOX1,HSPD1,ID1,IGFBP5,IL11,IL1B,IL6,IL8,KISS1,KITLG,KLF4,LEF1,LPAR1,LPP,LRP8,MAP3K8,MUC1,MYB,MYO10,NEXN,NGF,NRG1 (includes EG:112400),NRP…
Cellular Function and Maintenance	cytostasis	6.76E-06	2.31E-04	30	ABCC5,BCL6,BHLHE40,BIRC5,BMP4,CCND1,CD24,CDCA8,CDK4,CDKN1A,CDKN2C,CYR61,E4F1,ERBB2,ID1,IL6,JAG1,MXD1,PPP1R15A,RACGAP1,RXRA,SMAD3,SMARCA4,STAT1,SULF1,TOP2A,TRIM33,TTC5,UBE2I,ZNF217
Cardiovascular System Development and Function	development of blood vessel	6.91E-06	2.35E-04	40	ADAMTS1,AGGF1,ANGPT1,ANGPTL4,ANPEP,BMP2,BMP4,BTG1,CCL2,CCL26,CD44 (includes EG:100330801),CDH2,CYR61,DCN,DKK1,ECM1 (includes EG:100332249),EFNB2,EGR3,ERBB2,FGF2,GATA2,HEY1,HMOX1,HOXA5,ID1,IL1B,IL6,IL8,NR2F2,NRG1 (includes EG:112400),PGF,PRKD1,RGS4,S1PR3,SERPINC1,SERPINF1,STC1,VEGFA,VEGFC,WNT5A
Organismal Development	development of blood vessel	6.91E-06	2.35E-04	40	ADAMTS1,AGGF1,ANGPT1,ANGPTL4,ANPEP,BMP2,BMP4,BTG1,CCL2,CCL26,CD44 (includes EG:100330801),CDH2,CYR61,DCN,DKK1,ECM1 (includes EG:100332249),EFNB2,EGR3,ERBB2,FGF2,GATA2,HEY1,HMOX1,HOXA5,ID1,IL1B,IL6,IL8,NR2F2,NRG1 (includes EG:112400),PGF,PRKD1,RGS4,S1PR3,SERPINC1,SERPINF1,STC1,VEGFA,VEGFC,WNT5A
Cell Death	survival of tumor cell lines	8.37E-06	2.82E-04	62	ADK,AKAP13,ALPK2,BAX,BCKDK,BCL2L1,BDNF,BEX2,BIRC5,CA2,CASP2,CCL2,CCND1,CD44 (includes EG:100330801),CDK2,CDK6,CDKN1A,CEBPD,CHEK1,CHKA,DUSP10,DUSP5,DYRK3,ERBB2,FADD,FANCG,FGF2,HBEGF,HMOX1,HOXA5,HSPA5,IL1B,IL6,IL8,KIFC1,KITLG,MAD2L1,NGF,NUAK1,PARP1,PBK,PCNA,PLAUR,PLK2,PPM1D,PPP2R3A,PRKAA1,PTK2 (includes EG:14083),RAD51,RASA1,REV1 (includes EG:316344),RRM2,SGK1,SHFM1,SLC2A1,SOD2,SULF1,TGM2,TYMS,VEGF…
Cell Death	cell death of lung cancer cell lines	8.79E-06	2.94E-04	30	BAX,BCL2L1,BIRC5,CASP2,CDKN1A,CDKN2C,CEBPA,CFH,CFLAR,DAPK3,DDIT3,EPHA2,ERBB2,FGF2,GADD45A,GADD45B,ID3 (includes EG:15903),JAG1,MCL1,NRG1 (includes EG:112400),OSGIN1,PARP1,PMEPA1,RASD1,RRM1,RTKN,SRSF1,TBK1,TGM2,TNFRSF10B
Cellular Growth and Proliferation	growth of ovarian cancer cell lines	8.98E-06	2.99E-04	15	ARHGEF2,ATF3,CCND1,CD44 (includes EG:100330801),DAB2,DCN,ERBB2,GDF15,KCNH1,KLF2,MCM2,NRG1 (includes EG:112400),RXRA,SERTAD1,TCP1
Cellular Development	growth of ovarian cancer cell lines	8.98E-06	2.99E-04	15	ARHGEF2,ATF3,CCND1,CD44 (includes EG:100330801),DAB2,DCN,ERBB2,GDF15,KCNH1,KLF2,MCM2,NRG1 (includes EG:112400),RXRA,SERTAD1,TCP1
Cell Cycle	M phase	1.06E-05	3.51E-04	27	ANAPC10,ANAPC4,ANLN,BIRC5,CCDC99,CDC20,CDCA8,CDK1,CDKN1A,CENPF,CEP55,DLGAP5,ECT2,FBXO5,KIF20A,KIF20B,KIFC1,KLHL21,KLHL9,MAD2L1,NEK6,NEK7,NUSAP1,RAB35,RACGAP1,TOP2A,ZFYVE26
Cancer	infiltrating duct breast carcinoma	1.09E-05	3.58E-04	16	ARFGEF1,ASH2L,BRF2,CCND1,ECM1 (includes EG:100332249),EPHA2,FADD,MAP1LC3B,MT1E,MT1G,MT2A,MUC1,SAT2,SERPINF1,STAU2,ZNF703
Reproductive System Disease	infiltrating duct breast carcinoma	1.09E-05	3.58E-04	16	ARFGEF1,ASH2L,BRF2,CCND1,ECM1 (includes EG:100332249),EPHA2,FADD,MAP1LC3B,MT1E,MT1G,MT2A,MUC1,SAT2,SERPINF1,STAU2,ZNF703
Cell Cycle	arrest in G0/G1 phase transition	1.12E-05	3.65E-04	11	BMP4,CCND1,CD44 (includes EG:100330801),CDKN1A,CEBPD,CHKA,IL1B,IL6,PITX2,PLAUR,RXRA
Cell Death	apoptosis of kidney cell lines	1.14E-05	3.67E-04	30	BAX,BCL10,BCL2L1,BCL6,BIRC2,BIRC5,CASP2,CD44 (includes EG:100330801),CFLAR,E2F6,FADD,HSPA1A/HSPA1B,HSPA5,ITCH,MAP3K8,MCL1,NRG1 (includes EG:112400),PPM1A,PPP1R15A,PRKAA1,RFXANK,RGS4,RNF216,SRXN1,STK4,TMEFF2,TNFRSF10B,TNFRSF1A,TRIM39,ZNF622
Cell Cycle	senescence of cells	1.14E-05	3.67E-04	19	BHLHE40,BMP4,BRD7,BUB1 (includes EG:100307076),CDK4,CDKN1A,CDKN2B,CSNK2A2,FGF2,HSPA1A/HSPA1B,ID1,ING1,NAMPT,PARP1,RRAD,RUNX1,SREBF1,TSC22D1,VEGFA
Cellular Growth and Proliferation	growth of epithelial cell lines	1.16E-05	3.68E-04	15	ABCC5,BIRC5,CCND1,CDK2,CDKN1A,CHKA,DAB2,DLGAP5,ENC1,MST4,NDUFAB1,PPM1A,PTHLH,QPCT,RXRA
Cellular Development	growth of epithelial cell lines	1.16E-05	3.68E-04	15	ABCC5,BIRC5,CCND1,CDK2,CDKN1A,CHKA,DAB2,DLGAP5,ENC1,MST4,NDUFAB1,PPM1A,PTHLH,QPCT,RXRA
Hair and Skin Development and Function	growth of epithelial cell lines	1.16E-05	3.68E-04	15	ABCC5,BIRC5,CCND1,CDK2,CDKN1A,CHKA,DAB2,DLGAP5,ENC1,MST4,NDUFAB1,PPM1A,PTHLH,QPCT,RXRA
Cell Cycle	S phase of tumor cell lines	1.16E-05	3.68E-04	20	BHLHE40,CCNA2,CCND1,CDK1,CDKN1A,CHEK1,HMOX1,IL1B,IL6,MCM10 (includes EG:307126),MEIS2,MXD1,NRG1 (includes EG:112400),NRIP1,OSGIN1,REV1 (includes EG:316344),SOX9,SSTR1,SULF1,TYMS
Cellular Growth and Proliferation	growth of prostate cancer cell lines	1.19E-05	3.73E-04	24	BCL2L1,BIRC5,CCND1,CDK6,CDKN1A,CEBPD,DAB2,ERBB2,ETS2,GDF15,GLI2,HMOX1,IGFBP5,IL6,IL8,LEF1,MST4,NRG1 (includes EG:112400),PMEPA1,PPARG,RNF14,SAT1,TAF7,TFPI2
Cellular Development	growth of prostate cancer cell lines	1.19E-05	3.73E-04	24	BCL2L1,BIRC5,CCND1,CDK6,CDKN1A,CEBPD,DAB2,ERBB2,ETS2,GDF15,GLI2,HMOX1,IGFBP5,IL6,IL8,LEF1,MST4,NRG1 (includes EG:112400),PMEPA1,PPARG,RNF14,SAT1,TAF7,TFPI2
Cell Cycle	arrest in mitosis of cervical cancer cell lines	1.21E-05	3.79E-04	8	BIRC5,CSE1L,FBXO5,NEK6,NEK7,NUDCD3,RIC8A,TCP1
Cell Cycle	arrest in G1 phase	1.46E-05	4.53E-04	29	BHLHE40,BIRC5,BMP2,BTG2,CCND1,CDK2,CDK4,CDKN1A,CDKN2B,CYR61,DCN,DDIT3,E4F1,EP400,ERBB2,FBXO5,FGF2,GDF15,HOXA10,IL6,ING1,KLF4,PPARG,PTGES3,SP1,SSTR1,STRADA,TYMS,YWHAG
Cell Death	apoptosis of lung cancer cell lines	1.61E-05	4.96E-04	27	BAX,BCL2L1,BIRC5,CASP2,CDKN1A,CDKN2C,CEBPA,CFLAR,DAPK3,EPHA2,ERBB2,FGF2,GADD45A,GADD45B,ID3 (includes EG:15903),JAG1,MCL1,NRG1 (includes EG:112400),OSGIN1,PARP1,PMEPA1,RASD1,RRM1,RTKN,SRSF1,TBK1,TNFRSF10B
Cancer	leukemia	1.69E-05	5.18E-04	57	ARID5B,ASXL1,AURKB,BAX,BCL2L1,BCL3,BCL6,CCND1,CD14,CD24,CD55,CD59 (includes EG:25407),CDK1,CDK2,CDK4,CDK6,CDK7,CDK9,CDKN1A,CDKN2B,CEBPA,CHEK1,EPHA2,ERBB2,ETV6,FNTB,GATA2,HLX,HMGCR,IDH1,IL1B,ITGB5,LPP,MKL1,MLF1,MLLT10,MN1,PDE5A,PDGFRA,PLAGL2,PNP,POLE2,POR,PRIM1,PTGS1,RAD51,RRM1,RRM2,RUNX1,RXRA,TOP2A,TUBB2A,TUBE1,TUBG1,TYMS,UBE2I,VEGFA
Hematological Disease	leukemia	1.69E-05	5.18E-04	57	ARID5B,ASXL1,AURKB,BAX,BCL2L1,BCL3,BCL6,CCND1,CD14,CD24,CD55,CD59 (includes EG:25407),CDK1,CDK2,CDK4,CDK6,CDK7,CDK9,CDKN1A,CDKN2B,CEBPA,CHEK1,EPHA2,ERBB2,ETV6,FNTB,GATA2,HLX,HMGCR,IDH1,IL1B,ITGB5,LPP,MKL1,MLF1,MLLT10,MN1,PDE5A,PDGFRA,PLAGL2,PNP,POLE2,POR,PRIM1,PTGS1,RAD51,RRM1,RRM2,RUNX1,RXRA,TOP2A,TUBB2A,TUBE1,TUBG1,TYMS,UBE2I,VEGFA
Cellular Function and Maintenance	cytostasis of tumor cell lines	2.02E-05	6.16E-04	23	BCL6,BHLHE40,BIRC5,BMP4,CCND1,CD24,CDCA8,CDKN1A,CYR61,ERBB2,IL6,JAG1,MXD1,PPP1R15A,RACGAP1,RXRA,SMAD3,SMARCA4,STAT1,SULF1,TOP2A,TRIM33,TTC5
Cell Death	apoptosis of prostate cancer cell lines	2.10E-05	6.36E-04	27	BAX,BCL2L1,BIRC2,BIRC5,BMP2,CDK5R1,CFLAR,ETS2,FADD,GADD45A,GADD45G,GDF15,HBEGF,HSPA1A/HSPA1B,HSPB8,HSPD1,ID1,IGFBP5,IL6,MCL1,NGF,PLAUR,PMAIP1,RNASEL,STK4,TNFRSF10B,TNFRSF11B
Cell Death	apoptosis of leukemia cell lines	2.37E-05	7.14E-04	36	APAF1,BAX,BCL2L1,BIRC5,CASP2,CD55,CD59 (includes EG:25407),CDKN1A,CEBPA,CEBPD,CFLAR,CHKA,DDIT3,EGR3,ERN1,FADD,HMOX1,HSPA1A/HSPA1B,HSPA8,IKBKG,KLF4,KLF5,MCL1,MUC1,NGF,PARP1,PTK2 (includes EG:14083),RUNX1,SOD2,STK4,TNFAIP3,TNFRSF10B,TNFRSF10D,TNFRSF11B,TNFRSF1A,TRADD
Cancer	endometrial cancer	2.54E-05	7.58E-04	32	CDK1,CDK2,CDK4,CDK6,CDK7,CDK9,CSE1L,ERBB2,FGF2,IGFBP5,KLF2,KLF9,MRGPRF,NR2F2,OSR2,PDGFRA,POLE2,POR,RRM1,RRM2,SERPINC1,SNCAIP,SOCS2,SSTR1,SYNPO2,TOP2A,TUBB2A,TUBE1,TUBG1,TWIST2,TYMS,VEGFA
Reproductive System Disease	endometrial cancer	2.54E-05	7.58E-04	32	CDK1,CDK2,CDK4,CDK6,CDK7,CDK9,CSE1L,ERBB2,FGF2,IGFBP5,KLF2,KLF9,MRGPRF,NR2F2,OSR2,PDGFRA,POLE2,POR,RRM1,RRM2,SERPINC1,SNCAIP,SOCS2,SSTR1,SYNPO2,TOP2A,TUBB2A,TUBE1,TUBG1,TWIST2,TYMS,VEGFA
Hematological System Development and Function	erythropoiesis	2.68E-05	7.91E-04	16	BCL2L1,BMP4,CDK6,CDKN1A,CEBPA,DYRK3,ETV6,HOXA10,HOXA5,IL11,IL6,KITLG,MAFB,MYB,RUNX1,TNFRSF10B
Hematopoiesis	erythropoiesis	2.68E-05	7.91E-04	16	BCL2L1,BMP4,CDK6,CDKN1A,CEBPA,DYRK3,ETV6,HOXA10,HOXA5,IL11,IL6,KITLG,MAFB,MYB,RUNX1,TNFRSF10B
Cellular Growth and Proliferation	proliferation of smooth muscle cells	2.68E-05	7.91E-04	16	BMP4,CCL2,CXCL16,E4F1,FGF2,HBEGF,HMOX1,HSPD1,IGFBP5,IL12A,IL1B,IL6,IL8,PLAUR,TNFAIP3,TRIB1
Skeletal and Muscular System Development and Function	proliferation of smooth muscle cells	2.68E-05	7.91E-04	16	BMP4,CCL2,CXCL16,E4F1,FGF2,HBEGF,HMOX1,HSPD1,IGFBP5,IL12A,IL1B,IL6,IL8,PLAUR,TNFAIP3,TRIB1
Cancer	endometrial carcinoma	2.77E-05	8.12E-04	35	CDK1,CDK2,CDK4,CDK6,CDK7,CDK9,CSE1L,ERBB2,ETV5,FGF2,IGFBP5,IL6,IL8,KLF2,KLF9,MRGPRF,NR2F2,OSR2,PDGFRA,POLE2,POR,RRM1,RRM2,SERPINC1,SNCAIP,SOCS2,SSTR1,SYNPO2,TOP2A,TUBB2A,TUBE1,TUBG1,TWIST2,TYMS,VEGFA
Reproductive System Disease	endometrial carcinoma	2.77E-05	8.12E-04	35	CDK1,CDK2,CDK4,CDK6,CDK7,CDK9,CSE1L,ERBB2,ETV5,FGF2,IGFBP5,IL6,IL8,KLF2,KLF9,MRGPRF,NR2F2,OSR2,PDGFRA,POLE2,POR,RRM1,RRM2,SERPINC1,SNCAIP,SOCS2,SSTR1,SYNPO2,TOP2A,TUBB2A,TUBE1,TUBG1,TWIST2,TYMS,VEGFA
Cell Cycle	G2 phase of tumor cell lines	2.82E-05	8.21E-04	20	BAX,CCNA2,CCND1,CDK1,CDKN1A,CEBPA,CHEK1,CSE1L,FADD,GADD45A,IGFBP5,IL6,MAD2L1,MYB,NRG1 (includes EG:112400),PPP2CB,SULF1,TCP1,TP53BP1,XPC
Cancer	gastric cancer	2.83E-05	8.22E-04	32	ARAP3,CCND1,CD44 (includes EG:100330801),CDKN1A,CEBPA,DKK1,ERBB2,HMGCR,HSP90AA1,HSP90AB1,IL1B,IL6,IL8,MAL,MUC1,NAMPT,PDGFRA,POR,PPM1D,SERPINC1,SOX9,SSTR1,TOP2A,TUBB,TUBB2A,TUBB2B,TUBB6,TUBE1,TUBG1,TYMS,VEGFC,WNT5A
Gastrointestinal Disease	gastric cancer	2.83E-05	8.22E-04	32	ARAP3,CCND1,CD44 (includes EG:100330801),CDKN1A,CEBPA,DKK1,ERBB2,HMGCR,HSP90AA1,HSP90AB1,IL1B,IL6,IL8,MAL,MUC1,NAMPT,PDGFRA,POR,PPM1D,SERPINC1,SOX9,SSTR1,TOP2A,TUBB,TUBB2A,TUBB2B,TUBB6,TUBE1,TUBG1,TYMS,VEGFC,WNT5A
Cell Death	cell death of leukemia cell lines	2.92E-05	8.42E-04	39	APAF1,BAX,BCL2L1,BIRC5,BTG1,CASP2,CD55,CD59 (includes EG:25407),CDKN1A,CEBPA,CEBPD,CFLAR,CHKA,DDIT3,EGR3,ERN1,FADD,HMOX1,HSPA1A/HSPA1B,HSPA8,IKBKG,KLF4,KLF5,MCL1,MUC1,NGF,PARP1,PTK2 (includes EG:14083),RUNX1,SOD2,STK4,TNFAIP3,TNFRSF10B,TNFRSF10D,TNFRSF11B,TNFRSF1A,TOP2A,TRADD,YWHAG
Cancer	biliary tract cancer	2.95E-05	8.46E-04	22	BIRC5,C1S,CCND1,CD14,DKK1,ERBB2,HSP90AA1,HSP90AB1,KEAP1,POLE2,RPL13A,RPL9,RRM1,RRM2,SERPINC1,SSTR1,TOP2A,TUBB2A,TUBE1,TUBG1,TYMS,VEGFA
Gastrointestinal Disease	biliary tract cancer	2.95E-05	8.46E-04	22	BIRC5,C1S,CCND1,CD14,DKK1,ERBB2,HSP90AA1,HSP90AB1,KEAP1,POLE2,RPL13A,RPL9,RRM1,RRM2,SERPINC1,SSTR1,TOP2A,TUBB2A,TUBE1,TUBG1,TYMS,VEGFA
Tissue Development	accumulation of cells	3.30E-05	9.40E-04	14	AHR,BIRC5,CCL2,CCND1,CDKN1A,E2F6,ERBB2,GADD45G,HMOX1,IL6,IL8,MCM10 (includes EG:307126),RAD51,SNIP1
Cellular Growth and Proliferation	colony formation of cells	3.41E-05	9.64E-04	45	ANKRD1,ATF3,BAMBI,BCL2L1,BIRC5,CCND1,CDCA7,CDKN1A,CHEK1,CYR61,DCN,DYRK3,ERBB2,FGF2,GADD45A,GADD45B,GADD45G,HOXA10,HSPA1A/HSPA1B,IL11,IL6,IP6K2,KITLG,KLF4,MAD2L1,MST4,NEK6,NRG1 (includes EG:112400),PBK,PHLDA1,PLAGL1,PPP1R15A,PSRC1,RASD1,RNF34,RRAD,RRM2,RUNX1,SERTAD1,SFRP1,SIVA1,SOD2,SP1,TSPYL2,VEGFA
Cancer	pancreatic cancer	3.44E-05	9.66E-04	38	AHR,BIRC5,CCND1,CD59 (includes EG:25407),CDH2,CDK4,CDKN1A,CYR61,DKK1,EPHA2,ERBB2,FANCG,FNTB,FOXA1,GDF15,HBEGF,IL1B,IL6,KIAA0101,MUC1,NEFM,NPTX2,OGFR,PCNA,PDGFRA,POLE2,PTK2 (includes EG:14083),RRM1,RRM2,S100P,SSTR1,TNFRSF10D,TUBB2A,TUBE1,TUBG1,TYMS,VEGFA,WNT5A
Gastrointestinal Disease	pancreatic cancer	3.44E-05	9.66E-04	38	AHR,BIRC5,CCND1,CD59 (includes EG:25407),CDH2,CDK4,CDKN1A,CYR61,DKK1,EPHA2,ERBB2,FANCG,FNTB,FOXA1,GDF15,HBEGF,IL1B,IL6,KIAA0101,MUC1,NEFM,NPTX2,OGFR,PCNA,PDGFRA,POLE2,PTK2 (includes EG:14083),RRM1,RRM2,S100P,SSTR1,TNFRSF10D,TUBB2A,TUBE1,TUBG1,TYMS,VEGFA,WNT5A
Genetic Disorder	pancreatic cancer	3.44E-05	9.66E-04	38	AHR,BIRC5,CCND1,CD59 (includes EG:25407),CDH2,CDK4,CDKN1A,CYR61,DKK1,EPHA2,ERBB2,FANCG,FNTB,FOXA1,GDF15,HBEGF,IL1B,IL6,KIAA0101,MUC1,NEFM,NPTX2,OGFR,PCNA,PDGFRA,POLE2,PTK2 (includes EG:14083),RRM1,RRM2,S100P,SSTR1,TNFRSF10D,TUBB2A,TUBE1,TUBG1,TYMS,VEGFA,WNT5A
Cell Death	apoptosis of fibrosarcoma cell lines	3.46E-05	9.67E-04	12	BAX,BCL2L1,BIRC2,BIRC5,CDKN1A,CFLAR,FADD,PMAIP1,SOD2,STAT1,TBK1,TNFRSF1A
Cardiovascular System Development and Function	formation of blood vessel	3.56E-05	9.89E-04	8	ADAMTS1,AGGF1,ANPEP,CCL2,FGF2,IL1B,SERPINF1,VEGFA
Organismal Development	formation of blood vessel	3.56E-05	9.89E-04	8	ADAMTS1,AGGF1,ANPEP,CCL2,FGF2,IL1B,SERPINF1,VEGFA
Cancer	skin tumor	3.66E-05	1.01E-03	31	ANGPTL4,CDK1,CDK2,CDK4,CDK6,CDK7,CDK9,CHEK1,CSE1L,EPHA2,FH,FNTB,HSP90AA1,HSP90AB1,HSPA5,IL6,MCL1,MUC1,NRIP1,PDGFRA,POR,PRKD1,RXRA,SOD2,TOP2A,TUBB2A,TUBE1,TUBG1,TYMS,VEGFA,WNT5A
Dermatological Diseases and Conditions	skin tumor	3.66E-05	1.01E-03	31	ANGPTL4,CDK1,CDK2,CDK4,CDK6,CDK7,CDK9,CHEK1,CSE1L,EPHA2,FH,FNTB,HSP90AA1,HSP90AB1,HSPA5,IL6,MCL1,MUC1,NRIP1,PDGFRA,POR,PRKD1,RXRA,SOD2,TOP2A,TUBB2A,TUBE1,TUBG1,TYMS,VEGFA,WNT5A
Cellular Movement	migration of cells	3.74E-05	1.03E-03	104	AFAP1,ANGPT1,ANGPTL4,ANPEP,BCAR1,BCAR3,BCL10,BDNF,BMP2,BMP4,BTG2,CCL2,CCL26,CD24,CD44 (includes EG:100330801),CDH2,CDK1,CDK7,CITED2,CKLF,CSE1L,CSK,CXCL16,CYR61,DAB2,DCN,DKK1,DNAJA3,ECT2,EFNB1,EFNB2,EPHA2,ERBB2,FGF2,HBEGF,HEY1,HMGCR,HMOX1,HSPD1,ID1,IGFBP5,IL11,IL1B,IL6,IL8,KISS1,KITLG,KLF4,LEF1,LPAR1,LPP,LRP8,MAP3K8,MUC1,MYO10,NEXN,NGF,NRG1 (includes EG:112400),NRP1 (includes EG:18186),OSGIN1,PAFA…
Cellular Development	differentiation of blood cells	4.04E-05	1.10E-03	37	AHR,BCL2L1,BCL6,BMP2,BMP4,BTG2,CCL2,CD14,CDK6,CDKN2B,CEBPA,CEBPD,DKK1,DLL1,DYRK3,ETV6,GATA2,HIST1H4A (includes others),HOXA10,HOXA5,IL1B,IL6,IL8,KITLG,LEF1,MAFB,MLLT11,MYB,PDGFRA,PGF,PNP,PPARG,RACGAP1,RUNX1,SFRP1,TNFRSF10B,UBE2I
Hematological System Development and Function	differentiation of blood cells	4.04E-05	1.10E-03	37	AHR,BCL2L1,BCL6,BMP2,BMP4,BTG2,CCL2,CD14,CDK6,CDKN2B,CEBPA,CEBPD,DKK1,DLL1,DYRK3,ETV6,GATA2,HIST1H4A (includes others),HOXA10,HOXA5,IL1B,IL6,IL8,KITLG,LEF1,MAFB,MLLT11,MYB,PDGFRA,PGF,PNP,PPARG,RACGAP1,RUNX1,SFRP1,TNFRSF10B,UBE2I
Cell Cycle	entry into S phase	4.06E-05	1.10E-03	16	BHLHE40,C13orf15,CCND1,CDKN1A,ERBB2,FBXO5,FGF2,HBEGF,HMOX1,ID3 (includes EG:15903),IL1B,IL6,MCM10 (includes EG:307126),MEIS2,NRG1 (includes EG:112400),SSTR1
Cellular Compromise	calcification of smooth muscle cells	4.13E-05	1.12E-03	4	BMP2,IL1B,IL6,TGM2
Cell Death	cell viability of tumor cells	4.19E-05	1.12E-03	6	BMP2,BMP4,HMOX1,KITLG,MCL1,TAF1B
Cell Morphology	sprouting	4.38E-05	1.17E-03	7	BDNF,CYR61,DCN,FADD,NGF,RGS4,VEGFA
Tissue Development	development of cardiovascular tissue	4.51E-05	1.20E-03	26	ADAMTS1,AGGF1,ANKRD1,ANPEP,BMP2,BMP4,CCL26,CD44 (includes EG:100330801),CDH2,DKK1,ECM1 (includes EG:100332249),EFNB2,EGR3,FGF2,HEY1,HMOX1,IL1B,IL8,NDUFV2,NR2F2,SERPINC1,STC1,TPM1 (includes EG:22003),VEGFA,VEGFC,WNT5A
Cell Cycle	arrest in cell cycle progression of tumor cell lines	4.62E-05	1.22E-03	20	AHR,BMP4,CCNA2,CCND1,CDK2,CDK4,CDKN1A,CDKN2C,CEBPA,CKAP2,CKS2,ERBB2,IL6,MELK,PLAGL1,PPARG,RRAD,RRM1,SMARCA4,TCP1
Cancer	stomach tumor	4.63E-05	1.22E-03	39	ARAP3,BAX,CCND1,CD44 (includes EG:100330801),CDK4,CDKN1A,CEBPA,DDX39B,DKK1,ERBB2,HMGCR,HNRNPH1,HSP90AA1,HSP90AB1,IL1B,IL6,IL8,MAL,MUC1,NAMPT,NRIP1,PDGFRA,POR,PPM1D,SERPINC1,SOX9,SSTR1,TOP2A,TTK,TUBB,TUBB2A,TUBB2B,TUBB6,TUBE1,TUBG1,TYMS,UBE2C,VEGFC,WNT5A
Gastrointestinal Disease	stomach tumor	4.63E-05	1.22E-03	39	ARAP3,BAX,CCND1,CD44 (includes EG:100330801),CDK4,CDKN1A,CEBPA,DDX39B,DKK1,ERBB2,HMGCR,HNRNPH1,HSP90AA1,HSP90AB1,IL1B,IL6,IL8,MAL,MUC1,NAMPT,NRIP1,PDGFRA,POR,PPM1D,SERPINC1,SOX9,SSTR1,TOP2A,TTK,TUBB,TUBB2A,TUBB2B,TUBB6,TUBE1,TUBG1,TYMS,UBE2C,VEGFC,WNT5A
Cancer	oral cancer	4.68E-05	1.22E-03	15	CRYAB,ERBB2,FABP5,H3F3A/H3F3B,HSP90AA1,HSP90AB1,IFIT2,IL1B,IL8,S100P,SAT1,TUBB2A,TUBE1,TUBG1,TYMS
Genetic Disorder	psoriasis	4.73E-05	1.23E-03	80	ADAR,AMD1,APOD,ATP1B1,CBFB,CCL2,CCND1,CD24,CDK2,CDK5R1,CEBPD,CFLAR,DIO2,EFNB2,EIF4A3,EIF5,ELL2,EPHA2,ERBB2,ETF1,FABP5,FAR2,GAL,GK,GOT1,HMOX1,HSPA5,HSPA8,HSPE1,HSPH1,ID1,IFIT1,IFIT3,IFNGR2,IL12A,IL1B,IL6,IL8,KIAA0101,LAMA2,LAMA5,LOR,MAD2L1,MALL,MARCKS,MMP12,NAMPT,NR4A2,NRP1 (includes EG:18186),OSBPL1A,PARP9,PCBD1,PCNA,PDGFRA,PGF,POR,PPARG,PTGS1,PTP4A1,RANBP1,RCAN2,RGS12,S100P,SAMD9,SGK1,SOCS1,SOD2…
Dermatological Diseases and Conditions	psoriasis	4.73E-05	1.23E-03	80	ADAR,AMD1,APOD,ATP1B1,CBFB,CCL2,CCND1,CD24,CDK2,CDK5R1,CEBPD,CFLAR,DIO2,EFNB2,EIF4A3,EIF5,ELL2,EPHA2,ERBB2,ETF1,FABP5,FAR2,GAL,GK,GOT1,HMOX1,HSPA5,HSPA8,HSPE1,HSPH1,ID1,IFIT1,IFIT3,IFNGR2,IL12A,IL1B,IL6,IL8,KIAA0101,LAMA2,LAMA5,LOR,MAD2L1,MALL,MARCKS,MMP12,NAMPT,NR4A2,NRP1 (includes EG:18186),OSBPL1A,PARP9,PCBD1,PCNA,PDGFRA,PGF,POR,PPARG,PTGS1,PTP4A1,RANBP1,RCAN2,RGS12,S100P,SAMD9,SGK1,SOCS1,SOD2…
Cellular Growth and Proliferation	proliferation of cervical cancer cell lines	4.97E-05	1.28E-03	16	AURKB,BIRC2,BIRC5,CDKN1A,CHEK1,CKS2,DDX21,ITCH,NRG1 (includes EG:112400),NRIP1,OSGIN1,PFKFB3,RMI1 (includes EG:306734),SMARCA4,SOCS1,TCP1
Cellular Growth and Proliferation	proliferation of fibroblasts	4.97E-05	1.28E-03	16	B4GALT7,BMP2,BMP4,CDK4,CDK6,CDKN1A,CDKN2B,FGF2,IL6,PDGFRA,SERTAD1,SFRP1,SOD2,TAC1,TNFRSF11B,WNT5A
Connective Tissue Development and Function	proliferation of fibroblasts	4.97E-05	1.28E-03	16	B4GALT7,BMP2,BMP4,CDK4,CDK6,CDKN1A,CDKN2B,FGF2,IL6,PDGFRA,SERTAD1,SFRP1,SOD2,TAC1,TNFRSF11B,WNT5A
Cellular Development	differentiation of connective tissue cells	5.36E-05	1.37E-03	22	BMP2,BMP4,CCL2,CDK6,CEBPA,DKK1,ENPP1,FGF2,GADD45B,GLI2,IL11,IL6,IL8,PDE5A,PPARG,PTHLH,SFRP1,SMAD3,SOX9,STC1,TWIST2,VEGFA
Cellular Development	endothelial cell development	5.59E-05	1.42E-03	23	ADAMTS1,AGGF1,ANPEP,BMP2,BMP4,CCL26,CD44 (includes EG:100330801),CDH2,DKK1,ECM1 (includes EG:100332249),EFNB2,EGR3,FGF2,HEY1,HMOX1,IL1B,IL8,NR2F2,SERPINC1,STC1,VEGFA,VEGFC,WNT5A
Cardiovascular System Development and Function	endothelial cell development	5.59E-05	1.42E-03	23	ADAMTS1,AGGF1,ANPEP,BMP2,BMP4,CCL26,CD44 (includes EG:100330801),CDH2,DKK1,ECM1 (includes EG:100332249),EFNB2,EGR3,FGF2,HEY1,HMOX1,IL1B,IL8,NR2F2,SERPINC1,STC1,VEGFA,VEGFC,WNT5A
Organismal Development	endothelial cell development	5.59E-05	1.42E-03	23	ADAMTS1,AGGF1,ANPEP,BMP2,BMP4,CCL26,CD44 (includes EG:100330801),CDH2,DKK1,ECM1 (includes EG:100332249),EFNB2,EGR3,FGF2,HEY1,HMOX1,IL1B,IL8,NR2F2,SERPINC1,STC1,VEGFA,VEGFC,WNT5A
Tissue Development	endothelial cell development	5.59E-05	1.42E-03	23	ADAMTS1,AGGF1,ANPEP,BMP2,BMP4,CCL26,CD44 (includes EG:100330801),CDH2,DKK1,ECM1 (includes EG:100332249),EFNB2,EGR3,FGF2,HEY1,HMOX1,IL1B,IL8,NR2F2,SERPINC1,STC1,VEGFA,VEGFC,WNT5A
Cardiovascular System Development and Function	angiogenesis	5.66E-05	1.43E-03	31	ADAMTS1,AGGF1,ANGPT1,ANGPTL4,ANPEP,BMP2,BMP4,BTG1,CCL2,CYR61,DCN,ECM1 (includes EG:100332249),ERBB2,FGF2,GATA2,HMOX1,HOXA5,ID1,IL1B,IL6,IL8,NRG1 (includes EG:112400),PLAUR,PRKD1,RGS4,S1PR3,SERPINC1,SERPINF1,VEGFA,VEGFC,WNT5A
Cell Death	activation of caspase	5.75E-05	1.44E-03	13	APAF1,BAX,DNAJA3,HSPD1,MOAP1,NKX3-1,PMAIP1,PPARG,SIVA1,SLC11A2,SMAD3,STAT1,TPD52L1
Cell Signaling	activation of caspase	5.75E-05	1.44E-03	13	APAF1,BAX,DNAJA3,HSPD1,MOAP1,NKX3-1,PMAIP1,PPARG,SIVA1,SLC11A2,SMAD3,STAT1,TPD52L1
Cellular Development	maturation of blood cells	5.75E-05	1.44E-03	13	BIRC5,CCND1,CD44 (includes EG:100330801),CD83,CDKN1A,HSPA1A/HSPA1B,HSPD1,IL1B,IL6,KITLG,NGF,STAT1,TNFSF9
Cell Cycle	arrest in G0/G1 phase transition of tumor cell lines	5.81E-05	1.45E-03	9	CCND1,CDKN1A,CEBPD,CHKA,IL1B,IL6,PITX2,PLAUR,RXRA
Cell Death	apoptosis of bone cancer cell lines	5.86E-05	1.45E-03	21	BAX,BCL6,BCLAF1,BHLHE40,BIRC5,BMP2,BRAT1,CDK6,CDKN1A,CFLAR,DNAJA3,IGFBP5,KITLG,MCL1,OSGIN1,PLAGL1,PMAIP1,PRKAA1,RASA1,TNFRSF10B,TTC5
Cancer	pancreatic tumor	6.58E-05	1.62E-03	44	AHR,ATIC,ATP1A1,BIRC5,CCND1,CD59 (includes EG:25407),CDH2,CDK4,CDKN1A,CYR61,DKK1,EPHA2,ERBB2,FANCG,FNTB,FOXA1,GDF15,HBEGF,HOXA5,IGFBP5,IL1B,IL6,KIAA0101,KLF4,MUC1,NEFM,NPTX2,OGFR,PCNA,PDGFRA,POLE2,PTK2 (includes EG:14083),RRM1,RRM2,S100P,SOCS1,SSTR1,TNFRSF10D,TUBB2A,TUBE1,TUBG1,TYMS,VEGFA,WNT5A
Gastrointestinal Disease	pancreatic tumor	6.58E-05	1.62E-03	44	AHR,ATIC,ATP1A1,BIRC5,CCND1,CD59 (includes EG:25407),CDH2,CDK4,CDKN1A,CYR61,DKK1,EPHA2,ERBB2,FANCG,FNTB,FOXA1,GDF15,HBEGF,HOXA5,IGFBP5,IL1B,IL6,KIAA0101,KLF4,MUC1,NEFM,NPTX2,OGFR,PCNA,PDGFRA,POLE2,PTK2 (includes EG:14083),RRM1,RRM2,S100P,SOCS1,SSTR1,TNFRSF10D,TUBB2A,TUBE1,TUBG1,TYMS,VEGFA,WNT5A
Cellular Development	developmental process of red blood cells	7.11E-05	1.74E-03	15	BCL2L1,BMP4,CDK6,CDKN1A,CEBPA,DYRK3,ETV6,HOXA10,HOXA5,IL6,KITLG,MAFB,MYB,RUNX1,TNFRSF10B
Hematological System Development and Function	developmental process of red blood cells	7.11E-05	1.74E-03	15	BCL2L1,BMP4,CDK6,CDKN1A,CEBPA,DYRK3,ETV6,HOXA10,HOXA5,IL6,KITLG,MAFB,MYB,RUNX1,TNFRSF10B
Hematopoiesis	developmental process of red blood cells	7.11E-05	1.74E-03	15	BCL2L1,BMP4,CDK6,CDKN1A,CEBPA,DYRK3,ETV6,HOXA10,HOXA5,IL6,KITLG,MAFB,MYB,RUNX1,TNFRSF10B
Cancer	bile duct cancer	7.92E-05	1.93E-03	19	C1S,CD14,DKK1,ERBB2,HSP90AA1,HSP90AB1,POLE2,RPL13A,RPL9,RRM1,RRM2,SERPINC1,SSTR1,TOP2A,TUBB2A,TUBE1,TUBG1,TYMS,VEGFA
Gastrointestinal Disease	bile duct cancer	7.92E-05	1.93E-03	19	C1S,CD14,DKK1,ERBB2,HSP90AA1,HSP90AB1,POLE2,RPL13A,RPL9,RRM1,RRM2,SERPINC1,SSTR1,TOP2A,TUBB2A,TUBE1,TUBG1,TYMS,VEGFA
Cancer	B-cell non-Hodgkin's disease	8.15E-05	1.98E-03	27	BCL10,BCL3,BCL6,BTG1,BTG2,CDK2,CDK4,CDK6,CDK7,CDK9,CFLAR,EPHA2,FNTB,IL6,PIM2,RNF213,RRM1,SAMD9,SGK1,TNFAIP3,TOP2A,TUBB,TUBB2A,TUBB2B,TUBB6,TXLNA,TYMS
Hematological Disease	B-cell non-Hodgkin's disease	8.15E-05	1.98E-03	27	BCL10,BCL3,BCL6,BTG1,BTG2,CDK2,CDK4,CDK6,CDK7,CDK9,CFLAR,EPHA2,FNTB,IL6,PIM2,RNF213,RRM1,SAMD9,SGK1,TNFAIP3,TOP2A,TUBB,TUBB2A,TUBB2B,TUBB6,TXLNA,TYMS
Cell Cycle	cell cycle progression of lymphoblastoid cell lines	8.59E-05	2.07E-03	6	BAX,CASP2,CDKN1A,CDKN2C,IL6,PCNA
Cancer	cell transformation	9.07E-05	2.17E-03	21	AMD1,ARHGEF3,BCL2L1,BMP2,BTG2,CCND1,CDKN1A,DKK1,DNAJA3,EPHA2,FZD9,HYAL2,MXD1,NRG1 (includes EG:112400),PPM1D,RUNX1,SDCBP,SFRP1,SLC3A2,STARD13,TRRAP
Immunological Disease	lymphoproliferative disorder	9.10E-05	2.17E-03	36	ARID5B,BAX,BCL2L1,BCL3,BCL6,CCND1,CD14,CD24,CD55,CD59 (includes EG:25407),CDK1,CDK2,CDK4,CDK6,CDK7,CDK9,CDKN1A,CDKN2B,EPHA2,FNTB,HMGCR,IL1B,IL6,PDGFRA,PNP,POR,PRIM1,RRM1,RRM2,RUNX1,TOP2A,TUBB2A,TUBE1,TUBG1,TYMS,VEGFA
Cell Death	cell death of pancreatic cancer cell lines	9.23E-05	2.19E-03	13	BAX,BCL2L1,DDIT3,EPHA2,ERBB2,FADD,IL6,IL8,PRKD1,SOCS1,TBK1,TNFRSF10B,UBE2C
Cancer	thyroid cancer	9.38E-05	2.21E-03	26	ADAMTS1,CCND1,CDK4,CXCL16,ECM1 (includes EG:100332249),EFNB2,ERBB2,FGF2,GABBR2,GDF15,MAP3K8,MCM7,MUC1,PDGFRA,POR,PPARG,RXRA,SERPINF1,SOCS1,SOCS5,SSTR1,TNFSF9,TOP2A,TRIM33,VEGFA,WNT5A
Cellular Movement	cell movement of tumor cell lines	9.93E-05	2.33E-03	70	AFAP1,ANPEP,BCAR1,BCAR3,BCL10,CCL2,CD24,CD44 (includes EG:100330801),CDH2,CDK7,CKLF,CSE1L,CSK,CYR61,DAB2,DCN,DNAJA3,DNAJB4,ECT2,EFNB1,EPHA2,ERBB2,ETV5,FADD,FGF2,GDF15,ID1,IL6,IL8,KISS1,KITLG,KLF4,LPAR1,MAP3K8,MUC1,MYB,MYO10,NGF,NRG1 (includes EG:112400),NRP1 (includes EG:18186),NUP85 (includes EG:287830),OSGIN1,PBK,PCDH10,PGF,PITX2,PLAUR,PRKD1,PRMT6,PTHLH,PTK2 (includes EG:14083),RHOG,S1PR3,SDCBP…
Tissue Development	accumulation of tumor cell lines	9.96E-05	2.33E-03	10	AHR,BIRC5,CCND1,CDKN1A,ERBB2,GADD45G,HMOX1,IL6,MCM10 (includes EG:307126),SNIP1
Cell Cycle	arrest in G2 phase of tumor cell lines	1.03E-04	2.40E-03	17	CCNA2,CCND1,CDK1,CDKN1A,CEBPA,CHEK1,CSE1L,FADD,GADD45A,IGFBP5,IL6,MAD2L1,NRG1 (includes EG:112400),PPP2CB,TCP1,TP53BP1,XPC
Cellular Growth and Proliferation	proliferation of tumor cells	1.03E-04	2.40E-03	17	BAMBI,BMP4,CD44 (includes EG:100330801),CYR61,DCN,ERBB2,FGF2,ID1,ID3 (includes EG:15903),IL6,JAG1,NGF,PARP1,PLAUR,SFRP1,VEGFA,VEGFC
Tumor Morphology	proliferation of tumor cells	1.03E-04	2.40E-03	17	BAMBI,BMP4,CD44 (includes EG:100330801),CYR61,DCN,ERBB2,FGF2,ID1,ID3 (includes EG:15903),IL6,JAG1,NGF,PARP1,PLAUR,SFRP1,VEGFA,VEGFC
Cellular Movement	migration of tumor cell lines	1.07E-04	2.47E-03	57	AFAP1,ANPEP,BCAR1,BCAR3,BCL10,CCL2,CD24,CD44 (includes EG:100330801),CDH2,CDK7,CKLF,CSE1L,CSK,CYR61,DAB2,DCN,DNAJA3,ECT2,EFNB1,EPHA2,ERBB2,FGF2,ID1,IL6,IL8,KISS1,KITLG,KLF4,LPAR1,MAP3K8,MUC1,MYO10,NGF,NRG1 (includes EG:112400),NRP1 (includes EG:18186),OSGIN1,PITX2,PLAUR,PRKD1,PRMT6,PTHLH,PTK2 (includes EG:14083),RHOG,S1PR3,SDCBP,SERPINF1,SLC2A1,SLC9A3R1,SOD2,SST,SYNM,TFAP2C,TGM2,UBE2I,VEGFA,VEGFC…
Cell Death	cell death of connective tissue cells	1.09E-04	2.50E-03	23	ATF3,BAX,BCL2L1,BIRC2,BMP2,BMP4,CD44 (includes EG:100330801),CDKN1A,CFLAR,CYR61,EP400,FANCD2,HSPD1,IL1B,MCL1,NGF,NSMCE4A,PPARG,SFRP1,TNFRSF10B,TNFRSF10D,TNFRSF11B,TNFRSF1A
DNA Replication, Recombination, and Repair	metabolism of DNA	1.10E-04	2.51E-03	37	BAX,BCL2L1,BIRC5,CASP2,CCNA2,CDK2,CDKN1A,CDT1,CHEK1,GADD45G,GLI2,IL6,KIAA0101,KITLG,MCL1,MCM2,NRG1 (includes EG:112400),NT5E,ORC5 (includes EG:26429),PARP1,PCNA,PDGFRA,POLE2,POLG (includes EG:100150924),PTK2 (includes EG:14083),RAD51,RFC3,RPA2,SFRP1,SMARCAL1,SOD2,STAT1,TFAM,TIMELESS,TMPO,TPD52L1,TSPYL2
Cellular Development	differentiation of hematopoietic cells	1.16E-04	2.62E-03	18	BCL2L1,BMP2,BMP4,BTG2,CDKN2B,DKK1,ETV6,GATA2,HIST1H4A (includes others),HOXA10,HOXA5,KITLG,MYB,PDGFRA,PGF,RUNX1,TNFRSF10B,UBE2I
Hematological System Development and Function	differentiation of hematopoietic cells	1.16E-04	2.62E-03	18	BCL2L1,BMP2,BMP4,BTG2,CDKN2B,DKK1,ETV6,GATA2,HIST1H4A (includes others),HOXA10,HOXA5,KITLG,MYB,PDGFRA,PGF,RUNX1,TNFRSF10B,UBE2I
Hematopoiesis	differentiation of hematopoietic cells	1.16E-04	2.62E-03	18	BCL2L1,BMP2,BMP4,BTG2,CDKN2B,DKK1,ETV6,GATA2,HIST1H4A (includes others),HOXA10,HOXA5,KITLG,MYB,PDGFRA,PGF,RUNX1,TNFRSF10B,UBE2I
Cellular Growth and Proliferation	formation of cells	1.16E-04	2.62E-03	18	ANLN,BMP2,CCL2,CDKN1A,ERBB2,FGF2,IL11,IL6,IL7R,IL8,KITLG,NRG1 (includes EG:112400),PTHLH,SERPINF1,SHFM1,SMARCA4,VEGFA,ZFPM1
Cell Cycle	senescence of tumor cell lines	1.20E-04	2.67E-03	9	BHLHE40,BMP4,CDKN1A,CDKN2B,FGF2,HSPA1A/HSPA1B,ID1,PARP1,RRAD
Cancer	transformation of tumor cell lines	1.20E-04	2.67E-03	9	BMP2,CDKN1A,DKK1,DNAJA3,FZD9,NRG1 (includes EG:112400),SDCBP,SFRP1,STARD13
Cellular Growth and Proliferation	proliferation of endothelial cells	1.20E-04	2.67E-03	21	ADAMTS1,AGGF1,BMP2,BMP4,CCL26,CD44 (includes EG:100330801),CDH2,DKK1,ECM1 (includes EG:100332249),EFNB2,EGR3,FGF2,HEY1,HMOX1,IL1B,IL8,NR2F2,SERPINC1,VEGFA,VEGFC,WNT5A
Cellular Development	proliferation of endothelial cells	1.20E-04	2.67E-03	21	ADAMTS1,AGGF1,BMP2,BMP4,CCL26,CD44 (includes EG:100330801),CDH2,DKK1,ECM1 (includes EG:100332249),EFNB2,EGR3,FGF2,HEY1,HMOX1,IL1B,IL8,NR2F2,SERPINC1,VEGFA,VEGFC,WNT5A
Cardiovascular System Development and Function	proliferation of endothelial cells	1.20E-04	2.67E-03	21	ADAMTS1,AGGF1,BMP2,BMP4,CCL26,CD44 (includes EG:100330801),CDH2,DKK1,ECM1 (includes EG:100332249),EFNB2,EGR3,FGF2,HEY1,HMOX1,IL1B,IL8,NR2F2,SERPINC1,VEGFA,VEGFC,WNT5A
Organismal Development	proliferation of endothelial cells	1.20E-04	2.67E-03	21	ADAMTS1,AGGF1,BMP2,BMP4,CCL26,CD44 (includes EG:100330801),CDH2,DKK1,ECM1 (includes EG:100332249),EFNB2,EGR3,FGF2,HEY1,HMOX1,IL1B,IL8,NR2F2,SERPINC1,VEGFA,VEGFC,WNT5A
Tissue Development	proliferation of endothelial cells	1.20E-04	2.67E-03	21	ADAMTS1,AGGF1,BMP2,BMP4,CCL26,CD44 (includes EG:100330801),CDH2,DKK1,ECM1 (includes EG:100332249),EFNB2,EGR3,FGF2,HEY1,HMOX1,IL1B,IL8,NR2F2,SERPINC1,VEGFA,VEGFC,WNT5A
Cell Death	inhibition of apoptosis	1.21E-04	2.69E-03	25	ANGPT1,BCL2L1,BIRC5,CBX4,CCL2,CDK1,CFLAR,CRYAB,ERC1,HMOX1,HSPA1A/HSPA1B,HSPA5,HSPA9,IL1B,IL6,MCL1,NRG1 (includes EG:112400),PIM2,RASA1,RTKN,SIVA1,SOCS2,SUPV3L1,TNFAIP3,TNFRSF10D
Cell Cycle	G1 phase of tumor cell lines	1.23E-04	2.71E-03	28	AHR,BAX,BHLHE40,BMP2,BTG2,CCND1,CDK2,CDK4,CDK6,CDKN1A,CDKN2B,CYR61,DCN,DDIT3,ERBB2,FGF2,GDF15,HOXA10,IL6,KLF4,MT1A,MXD1,NRG1 (includes EG:112400),PTGES3,SNX33,SP1,TYMS,YWHAG
Cell Cycle	cell cycle progression of bone cancer cell lines	1.27E-04	2.78E-03	7	AHR,BCL6,CCND1,CDK4,CDKN2C,PLAGL1,PPP2R3A
Developmental Disorder	hypertrophy	1.36E-04	2.97E-03	11	BDNF,BMP2,HBEGF,HMGCR,IL11,LEMD3,PDE5A,PTK2 (includes EG:14083),STC1,TNFRSF11B,TPM1 (includes EG:22003)
Free Radical Scavenging	quantity of reactive oxygen species	1.44E-04	3.13E-03	13	BAX,DNAJB1,HSPA4,IL1B,IL8,ITCH,KLF2,MUC1,NDUFAB1,PBK,PRDX6,SOD2,TXNIP
Molecular Transport	quantity of reactive oxygen species	1.44E-04	3.13E-03	13	BAX,DNAJB1,HSPA4,IL1B,IL8,ITCH,KLF2,MUC1,NDUFAB1,PBK,PRDX6,SOD2,TXNIP
Cancer	lymphocytic leukemia	1.52E-04	3.29E-03	34	ARID5B,BAX,BCL2L1,BCL3,BCL6,CCND1,CD14,CD24,CD55,CD59 (includes EG:25407),CDK1,CDK2,CDK4,CDK6,CDK7,CDK9,CDKN1A,CDKN2B,EPHA2,FNTB,HMGCR,IL1B,PDGFRA,PNP,POR,PRIM1,RRM1,RRM2,RUNX1,TOP2A,TUBB2A,TUBE1,TUBG1,VEGFA
Hematological Disease	lymphocytic leukemia	1.52E-04	3.29E-03	34	ARID5B,BAX,BCL2L1,BCL3,BCL6,CCND1,CD14,CD24,CD55,CD59 (includes EG:25407),CDK1,CDK2,CDK4,CDK6,CDK7,CDK9,CDKN1A,CDKN2B,EPHA2,FNTB,HMGCR,IL1B,PDGFRA,PNP,POR,PRIM1,RRM1,RRM2,RUNX1,TOP2A,TUBB2A,TUBE1,TUBG1,VEGFA
Immunological Disease	lymphocytic leukemia	1.52E-04	3.29E-03	34	ARID5B,BAX,BCL2L1,BCL3,BCL6,CCND1,CD14,CD24,CD55,CD59 (includes EG:25407),CDK1,CDK2,CDK4,CDK6,CDK7,CDK9,CDKN1A,CDKN2B,EPHA2,FNTB,HMGCR,IL1B,PDGFRA,PNP,POR,PRIM1,RRM1,RRM2,RUNX1,TOP2A,TUBB2A,TUBE1,TUBG1,VEGFA
Cancer	neuroepithelial tumor	1.60E-04	3.44E-03	29	CDK1,CDK2,CDK4,CDK6,CDK7,CDK9,CDKN2B,CDKN2C,CLEC2D,CLK2,CXCL16,ECT2,ENC1,EPHA2,ERBB2,FGF2,HBEGF,HSPA5,ITGB5,LPAR1,MARCKS,NEK6,PDGFRA,PPARG,SLC9A3R1,TOP2A,TYMS,UBE2C,VEGFA
Cell Death	apoptosis of lymphoma cell lines	1.80E-04	3.86E-03	21	BCL2L1,BIRC5,BMP2,CASP2,CD24,CD55,CD59 (includes EG:25407),CDKN1A,CFLAR,EIF2AK3,ERN1,FADD,HNRNPC,LMNB1,MCL1,PPARG,RAD23B,RUNX1,TGM2,TNFRSF10B,TNFRSF1A
Cellular Development	angiogenesis of endothelial cell lines	1.93E-04	4.12E-03	4	ERBB2,IL8,NRG1 (includes EG:112400),VEGFA
Cardiovascular System Development and Function	angiogenesis of endothelial cell lines	1.93E-04	4.12E-03	4	ERBB2,IL8,NRG1 (includes EG:112400),VEGFA
Organismal Development	angiogenesis of endothelial cell lines	1.93E-04	4.12E-03	4	ERBB2,IL8,NRG1 (includes EG:112400),VEGFA
Cellular Movement	migration of mesenchymal stem cells	1.93E-04	4.12E-03	4	BCAR1,NRG1 (includes EG:112400),PDGFRA,PGF
Hematological System Development and Function	migration of mesenchymal stem cells	1.93E-04	4.12E-03	4	BCAR1,NRG1 (includes EG:112400),PDGFRA,PGF
Hematopoiesis	migration of mesenchymal stem cells	1.93E-04	4.12E-03	4	BCAR1,NRG1 (includes EG:112400),PDGFRA,PGF
Immune Cell Trafficking	migration of mesenchymal stem cells	1.93E-04	4.12E-03	4	BCAR1,NRG1 (includes EG:112400),PDGFRA,PGF
Inflammatory Response	migration of mesenchymal stem cells	1.93E-04	4.12E-03	4	BCAR1,NRG1 (includes EG:112400),PDGFRA,PGF
Cellular Development	differentiation of hematopoietic progenitor cells	1.99E-04	4.20E-03	17	BCL2L1,BMP2,BMP4,BTG2,CDKN2B,DKK1,ETV6,GATA2,HIST1H4A (includes others),HOXA10,HOXA5,KITLG,MYB,PDGFRA,PGF,RUNX1,TNFRSF10B
Hematological System Development and Function	differentiation of hematopoietic progenitor cells	1.99E-04	4.20E-03	17	BCL2L1,BMP2,BMP4,BTG2,CDKN2B,DKK1,ETV6,GATA2,HIST1H4A (includes others),HOXA10,HOXA5,KITLG,MYB,PDGFRA,PGF,RUNX1,TNFRSF10B
Hematopoiesis	differentiation of hematopoietic progenitor cells	1.99E-04	4.20E-03	17	BCL2L1,BMP2,BMP4,BTG2,CDKN2B,DKK1,ETV6,GATA2,HIST1H4A (includes others),HOXA10,HOXA5,KITLG,MYB,PDGFRA,PGF,RUNX1,TNFRSF10B
Tissue Development	adhesion of cervical cancer cell lines	2.00E-04	4.20E-03	7	CDH2,CSK,MAP3K8,PITX2,PTK2 (includes EG:14083),PTPN14,SIPA1
Cell-To-Cell Signaling and Interaction	adhesion of cervical cancer cell lines	2.00E-04	4.20E-03	7	CDH2,CSK,MAP3K8,PITX2,PTK2 (includes EG:14083),PTPN14,SIPA1
Cell Cycle	arrest in G2 phase of cervical cancer cell lines	2.00E-04	4.20E-03	7	CCNA2,CHEK1,CSE1L,GADD45A,PPP2CB,TCP1,XPC
Hematological System Development and Function	myelopoiesis	2.14E-04	4.48E-03	18	BCL2L1,BMP4,CDK6,CDKN1A,CEBPA,DYRK3,ETV6,HIST1H4A (includes others),HOXA10,HOXA5,IL11,IL6,KITLG,LEF1,MAFB,MYB,RUNX1,TNFRSF10B
Hematopoiesis	myelopoiesis	2.14E-04	4.48E-03	18	BCL2L1,BMP4,CDK6,CDKN1A,CEBPA,DYRK3,ETV6,HIST1H4A (includes others),HOXA10,HOXA5,IL11,IL6,KITLG,LEF1,MAFB,MYB,RUNX1,TNFRSF10B
Cell Cycle	cell cycle progression of cervical cancer cell lines	2.29E-04	4.76E-03	9	AHR,BIRC5,CCNA2,CDKN1A,CKS2,CSE1L,CSNK2A2,SMARCA4,TCP1
Tissue Development	adhesion of tumor cell lines	2.31E-04	4.79E-03	32	AFAP1,CCL2,CD44 (includes EG:100330801),CD55,CD59 (includes EG:25407),CDH2,CSK,CYR61,CYTH1,DAB2,DCN,EFNB1,EMILIN1,EPHA2,FXYD5,IL6,IL8,INHBB,MAD2L1,MAP3K8,MARCKS,NRG1 (includes EG:112400),PITX2,PLAUR,PPARG,PTGES3,PTK2 (includes EG:14083),PTPN14,SIPA1,SMAD3,TGM2,VEGFA
Cell-To-Cell Signaling and Interaction	adhesion of tumor cell lines	2.31E-04	4.79E-03	32	AFAP1,CCL2,CD44 (includes EG:100330801),CD55,CD59 (includes EG:25407),CDH2,CSK,CYR61,CYTH1,DAB2,DCN,EFNB1,EMILIN1,EPHA2,FXYD5,IL6,IL8,INHBB,MAD2L1,MAP3K8,MARCKS,NRG1 (includes EG:112400),PITX2,PLAUR,PPARG,PTGES3,PTK2 (includes EG:14083),PTPN14,SIPA1,SMAD3,TGM2,VEGFA
Cellular Compromise	stress response of cells	2.36E-04	4.86E-03	10	ATF4,CDKN1A,DDIT3,EIF2AK3,ERN1,HSPA5,IL1B,MUC1,NAMPT,PRDX6
Cell Death	cell death of lymphoma cell lines	2.56E-04	5.24E-03	23	BCL2L1,BIRC5,BMP2,BTG2,CASP2,CD24,CD55,CD59 (includes EG:25407),CDKN1A,CFLAR,EIF2AK3,ERN1,FADD,HNRNPC,LMNB1,MCL1,PPARG,RAD23B,RUNX1,SOD2,TGM2,TNFRSF10B,TNFRSF1A
Cancer	chronic B-cell leukemia	2.56E-04	5.24E-03	23	BAX,BCL2L1,BCL6,CCND1,CD24,CD55,CD59 (includes EG:25407),CDK1,CDK2,CDK4,CDK6,CDK7,CDK9,CDKN1A,EPHA2,HMGCR,IL1B,PNP,PRIM1,RRM1,RRM2,TOP2A,VEGFA
Hematological Disease	chronic B-cell leukemia	2.56E-04	5.24E-03	23	BAX,BCL2L1,BCL6,CCND1,CD24,CD55,CD59 (includes EG:25407),CDK1,CDK2,CDK4,CDK6,CDK7,CDK9,CDKN1A,EPHA2,HMGCR,IL1B,PNP,PRIM1,RRM1,RRM2,TOP2A,VEGFA
Immunological Disease	chronic B-cell leukemia	2.56E-04	5.24E-03	23	BAX,BCL2L1,BCL6,CCND1,CD24,CD55,CD59 (includes EG:25407),CDK1,CDK2,CDK4,CDK6,CDK7,CDK9,CDKN1A,EPHA2,HMGCR,IL1B,PNP,PRIM1,RRM1,RRM2,TOP2A,VEGFA
Cellular Growth and Proliferation	growth of carcinoma cell lines	2.63E-04	5.35E-03	20	BAX,BIRC5,CDCA4,CDCA5,CEBPA,DAB2,DKK1,DNAJB4,ECT2,FZD9,HMOX1,ID1,KISS1,KITLG,KLF2,PPARG,RASD1,SMARCA4,TNFRSF1A,UHRF1
Cellular Development	growth of carcinoma cell lines	2.63E-04	5.35E-03	20	BAX,BIRC5,CDCA4,CDCA5,CEBPA,DAB2,DKK1,DNAJB4,ECT2,FZD9,HMOX1,ID1,KISS1,KITLG,KLF2,PPARG,RASD1,SMARCA4,TNFRSF1A,UHRF1
Cellular Growth and Proliferation	proliferation of carcinoma cell lines	2.64E-04	5.35E-03	21	APAF1,BAX,BMP2,CASP2,CDK2,CDK4,CDK5R1,CDKN1A,CEBPA,CHEK1,CYR61,DNAJB4,FGF2,ID1,IKBKG,KITLG,NRG1 (includes EG:112400),OSGIN1,PDGFRA,TFPI2,WNT5A
Developmental Disorder	hypertrophy of cells	2.77E-04	5.57E-03	6	BDNF,BMP2,HBEGF,IL11,PTK2 (includes EG:14083),STC1
Infectious Disease	replication of vesicular stomatitis virus	2.77E-04	5.57E-03	6	BAX,IRF9,SOCS1,STAT2,TBK1,TRADD
Cancer	B-cell leukemia	2.78E-04	5.57E-03	24	BAX,BCL2L1,BCL3,BCL6,CCND1,CD24,CD55,CD59 (includes EG:25407),CDK1,CDK2,CDK4,CDK6,CDK7,CDK9,CDKN1A,EPHA2,HMGCR,IL1B,PNP,PRIM1,RRM1,RRM2,TOP2A,VEGFA
Hematological Disease	B-cell leukemia	2.78E-04	5.57E-03	24	BAX,BCL2L1,BCL3,BCL6,CCND1,CD24,CD55,CD59 (includes EG:25407),CDK1,CDK2,CDK4,CDK6,CDK7,CDK9,CDKN1A,EPHA2,HMGCR,IL1B,PNP,PRIM1,RRM1,RRM2,TOP2A,VEGFA
Immunological Disease	B-cell leukemia	2.78E-04	5.57E-03	24	BAX,BCL2L1,BCL3,BCL6,CCND1,CD24,CD55,CD59 (includes EG:25407),CDK1,CDK2,CDK4,CDK6,CDK7,CDK9,CDKN1A,EPHA2,HMGCR,IL1B,PNP,PRIM1,RRM1,RRM2,TOP2A,VEGFA
Cellular Development	differentiation of bone marrow cells	2.85E-04	5.67E-03	11	BCL2L1,BMP2,CDKN2B,DKK1,FGF2,HIST1H4A (includes others),IL11,KITLG,PDGFRA,PGF,RUNX1
Hematopoiesis	differentiation of bone marrow cells	2.85E-04	5.67E-03	11	BCL2L1,BMP2,CDKN2B,DKK1,FGF2,HIST1H4A (includes others),IL11,KITLG,PDGFRA,PGF,RUNX1
Cell Death	survival of breast cancer cell lines	2.93E-04	5.81E-03	16	BCL2L1,BEX2,CA2,CCND1,CD44 (includes EG:100330801),CDK2,CDKN1A,CEBPD,ERBB2,HOXA5,KIFC1,MAD2L1,NGF,PBK,PPM1D,SOD2
Post-Translational Modification	phosphorylation of protein	2.99E-04	5.90E-03	57	AURKB,BMP2,BMP4,BRSK1,BUB1 (includes EG:100307076),CCL2,CCND1,CD55,CDK2,CDK4,CDK5R1,CDK6,CDK7,CDK9,CHEK1,CLK2,CSK,CSNK1D,DAB2,DAPK3,DYRK3,EEF2K,EIF2AK3,ERBB2,ERN1,FGF2,FLCN,GTF2H4,IL1B,IRAK2,KITLG,MAP3K6,MAP3K8,MELK,MST4,NEK6,NEK7,NIM1,PDGFRA,PDK4,PELI2,PIM2,PIM3,PKMYT1,PLK4,POLR2C,PRKAA1,PRKD1,PTK2 (includes EG:14083),SGK1,SIK1,SLC3A2,STK17B,STK4,STRADA,TAC1,VEGFA
Cell Cycle	entry into mitosis	3.05E-04	5.90E-03	7	CCNB1IP1,CDKN1A,CHEK1,JUB,MAPK7,NRG1 (includes EG:112400),PKMYT1
Cell Cycle	G1 phase of breast cancer cell lines	3.06E-04	5.90E-03	10	BHLHE40,BTG2,CCND1,CDKN1A,DCN,ERBB2,GDF15,HOXA10,NRG1 (includes EG:112400),SNX33
Protein Synthesis	homo-oligomerization of protein	3.06E-04	5.90E-03	10	AKR1C1/AKR1C2,BAX,BCL10,CRYAB,ECT2,EIF2AK3,GCH1,HMOX1,PEX14 (includes EG:40294),RAD51
Cell Cycle	arrest in interphase of cervical cancer cell lines	3.08E-04	5.90E-03	9	CCNA2,CHEK1,CSE1L,GADD45A,PITX2,PPP2CB,REV1 (includes EG:316344),TCP1,XPC
Cellular Development	maturation of dendritic cells	3.08E-04	5.90E-03	9	CD44 (includes EG:100330801),CD83,HSPA1A/HSPA1B,HSPD1,IL1B,IL6,NGF,STAT1,TNFSF9
Hematopoiesis	maturation of dendritic cells	3.08E-04	5.90E-03	9	CD44 (includes EG:100330801),CD83,HSPA1A/HSPA1B,HSPD1,IL1B,IL6,NGF,STAT1,TNFSF9
Cellular Growth and Proliferation	proliferation of lymphoblastoid cell lines	3.08E-04	5.90E-03	9	BAX,CASP2,CDKN1A,CENPB,GLI2,PCNA,SOD2,TLE4,TRRAP
Cancer	ovarian adenocarcinoma	3.10E-04	5.90E-03	24	BCL10,BNC1,C13orf15,CALB2,CD24,CFH,CXXC5,DAB2,FLRT2,GPX3,HIST2H2AA3/HIST2H2AA4,HN1,KCNK6,LRP8,MUC1,PDGFRA,PTGER2,PTGS1,RACGAP1,STAT1,TFPI2,TXNIP,UBE2C,VEGFA
Reproductive System Disease	ovarian adenocarcinoma	3.10E-04	5.90E-03	24	BCL10,BNC1,C13orf15,CALB2,CD24,CFH,CXXC5,DAB2,FLRT2,GPX3,HIST2H2AA3/HIST2H2AA4,HN1,KCNK6,LRP8,MUC1,PDGFRA,PTGER2,PTGS1,RACGAP1,STAT1,TFPI2,TXNIP,UBE2C,VEGFA
Gene Expression	repression of RNA	3.15E-04	5.90E-03	17	APPL2,BCL6,CBX4,CCND1,CDKN2C,CIR1,DNMT1,GTF2B,HOXA10,IL6,ING1,MCRS1,NR2F2,RUNX1,SAP130,SMARCA4,SPOP
DNA Replication, Recombination, and Repair	repair of DNA	3.16E-04	5.90E-03	29	ALKBH1,BCL2L1,BTG2,CDCA5,CDK2,CDKN1A,CEBPA,CHEK1,CSNK1D,ERBB2,EXO1 (includes EG:26909),FGF2,GADD45A,GADD45G,HMOX1,IL1B,PARP1,PCNA,POLG (includes EG:100150924),PRMT6,RAD23B,RAD51,RAD51C,REV1 (includes EG:316344),RRM1,SLX4 (includes EG:100001183),SMAD3,SOD2,XPC
Cell Cycle	G0/G1 phase transition of breast cancer cell lines	3.17E-04	5.90E-03	5	CDKN1A,IL1B,IL6,RXRA,SOX9
Cell Death	cell viability of cancer cells	3.17E-04	5.90E-03	5	BMP2,BMP4,HMOX1,MCL1,TAF1B
Cell Cycle	delay in M phase of cervical cancer cell lines	3.17E-04	5.90E-03	5	ECT2,MAD2L1,NEK6,NEK7,TOP2A
Cell Morphology	mineralization of cells	3.17E-04	5.90E-03	5	BHLHE40,BMP2,FGF2,IL6,PRKD1
Post-Translational Modification	refolding of protein	3.17E-04	5.90E-03	5	DNAJA1,DNAJA4,HSP90AA1,HSPA1A/HSPA1B,HSPD1
Protein Folding	refolding of protein	3.17E-04	5.90E-03	5	DNAJA1,DNAJA4,HSP90AA1,HSPA1A/HSPA1B,HSPD1
Cancer	melanoma	3.17E-04	5.90E-03	41	AURKB,BIRC5,CD44 (includes EG:100330801),CDK1,CDK2,CDK4,CDK6,CDK7,CDK9,CHEK1,CLK2,CSE1L,CXCL16,EPHA2,ERBB2,FGF2,FNTB,HEY1,HMGCR,HSP90AA1,HSP90AB1,IL1B,IL6,IL8,ITGB5,MCM4,MCM7,NEK6,NEK7,NUSAP1,ORC5 (includes EG:26429),PDGFRA,RFC2,RRM2,TRRAP,TUBB2A,TUBE1,TUBG1,VEGFA,VEGFC,WNT5A
Cellular Growth and Proliferation	proliferation of cancer cells	3.22E-04	5.97E-03	14	BAMBI,CD44 (includes EG:100330801),DCN,ERBB2,FGF2,ID1,ID3 (includes EG:15903),IL6,JAG1,PARP1,PLAUR,SFRP1,VEGFA,VEGFC
Tumor Morphology	proliferation of cancer cells	3.22E-04	5.97E-03	14	BAMBI,CD44 (includes EG:100330801),DCN,ERBB2,FGF2,ID1,ID3 (includes EG:15903),IL6,JAG1,PARP1,PLAUR,SFRP1,VEGFA,VEGFC
Cell Cycle	cytokinesis	3.30E-04	6.09E-03	18	ANLN,BIRC5,CDC20,CDKN1A,CEP55,ECT2,KIF20A,KIF20B,KIFC1,KLHL21,KLHL9,NEK6,NEK7,NUSAP1,RAB35,RACGAP1,TOP2A,ZFYVE26
Cellular Movement	cytokinesis	3.30E-04	6.09E-03	18	ANLN,BIRC5,CDC20,CDKN1A,CEP55,ECT2,KIF20A,KIF20B,KIFC1,KLHL21,KLHL9,NEK6,NEK7,NUSAP1,RAB35,RACGAP1,TOP2A,ZFYVE26
Cancer	central nervous system tumor	3.41E-04	6.27E-03	41	BAX,CCND1,CDK1,CDK2,CDK4,CDK6,CDK7,CDK9,CDKN2B,CDKN2C,CLEC2D,CLK2,CXCL16,ECT2,ENC1,EPHA2,ERBB2,FGF2,FNTB,HBEGF,HMGCR,HSPA5,ITGB5,KHDRBS3,LPAR1,MARCKS,MCL1,MN1,NEK6,PDGFRA,PPARG,RRM2,SLC9A3R1,SOCS1,TOP2A,TUBB2A,TUBE1,TUBG1,TYMS,UBE2C,VEGFA
Cell Death	cell death of sarcoma cells	3.58E-04	6.55E-03	11	ANPEP,BCL2L1,CASP2,CD24,HMOX1,IL6,LPAR1,MUC1,PARP1,TNFRSF10B,VEGFC
Cell Death	apoptosis of neuroblastoma cell lines	3.67E-04	6.69E-03	15	BCL2L1,BDNF,BIRC5,CDKN1A,CFH,DDIT3,DNAJB1,GAL,HSPA1A/HSPA1B,IGFBP5,IL1B,NGF,PARP1,TGM2,VEGFA
Cancer	neuroblastoma	3.79E-04	6.89E-03	18	CCND1,CD44 (includes EG:100330801),CDK1,CDK2,CDK4,CDK6,CDK7,CDK9,KIF1B,PDGFRA,POR,RXRA,TOP2A,TUBB2A,TUBE1,TUBG1,TYMS,WNT5A
Reproductive System Disease	neuroblastoma	3.79E-04	6.89E-03	18	CCND1,CD44 (includes EG:100330801),CDK1,CDK2,CDK4,CDK6,CDK7,CDK9,KIF1B,PDGFRA,POR,RXRA,TOP2A,TUBB2A,TUBE1,TUBG1,TYMS,WNT5A
Cell Cycle	arrest in G1 phase of tumor cell lines	3.81E-04	6.90E-03	21	BHLHE40,BMP2,BTG2,CCND1,CDK2,CDK4,CDKN1A,CDKN2B,CYR61,DCN,DDIT3,ERBB2,FGF2,GDF15,HOXA10,IL6,KLF4,PTGES3,SP1,TYMS,YWHAG
Cell Death	apoptosis of epithelial cells	3.84E-04	6.93E-03	14	APAF1,BCL2L1,CFLAR,CRYAB,EP400,FADD,FGF2,IL1B,IL8,MCL1,PLAUR,PTK2 (includes EG:14083),SFRP1,TNFRSF10B
Cell Death	apoptosis of lymphoblastoid cell lines	3.87E-04	6.94E-03	8	BAX,BMP2,CASP2,CDKN1A,CDKN2C,IL6,PCNA,SOD2
Cellular Growth and Proliferation	proliferation of kidney cell lines	3.94E-04	7.05E-03	10	CAV2,CEBPA,HSPD1,OXTR,PLAUR,PTP4A1,RARRES3,RXRA,TMEFF2,TSC22D3
Renal and Urological System Development and Function	proliferation of kidney cell lines	3.94E-04	7.05E-03	10	CAV2,CEBPA,HSPD1,OXTR,PLAUR,PTP4A1,RARRES3,RXRA,TMEFF2,TSC22D3
Cell Death	cell death of bone cancer cell lines	4.18E-04	7.44E-03	22	BAX,BCL6,BCLAF1,BHLHE40,BIRC5,BMP2,BRAT1,CDK6,CDKN1A,CFLAR,CHEK1,DNAJA3,IGFBP5,KITLG,MCL1,OSGIN1,PLAGL1,PMAIP1,PRKAA1,RASA1,TNFRSF10B,TTC5
Cellular Growth and Proliferation	proliferation of epithelial cell lines	4.70E-04	8.34E-03	12	CCND1,CEBPA,CYR61,ERBB2,FGF2,PLAUR,PTP4A1,RARRES3,RXRA,TAC1,TMEFF2,TSC22D3
Hair and Skin Development and Function	proliferation of epithelial cell lines	4.70E-04	8.34E-03	12	CCND1,CEBPA,CYR61,ERBB2,FGF2,PLAUR,PTP4A1,RARRES3,RXRA,TAC1,TMEFF2,TSC22D3
Tissue Morphology	quantity of cells	4.93E-04	8.73E-03	34	BDNF,BHLHE40,BIRC5,BMP2,BMP4,CCND1,CD83,CDK4,CDKN1A,ERBB2,FGF2,GATA2,HMOX1,HOXA10,HOXA5,IGFBP5,IL11,IL1B,IL6,IL8,KIF20B,KITLG,KLF4,NAT10,NGF,PARP1,PTHLH,SGK1,STC1,TNFRSF1A,TYMS,UHRF1,VEGFA,ZFYVE26
Gene Expression	transactivation	5.14E-04	8.93E-03	53	AHR,AKAP13,ASXL1,BCL6,BDNF,BEX2,CBY1,CDCA4,CDK7,CDK9,CEBPA,CHST14,DAB2,E2F2,E2F6,ERN1,GLI2,HERC5,HNRNPC,ID3 (includes EG:15903),IGFBP5,IL1B,IL6,IL8,IRF9,ITSN1,JMJD6,KLF2,MCM5,MED26 (includes EG:306328),MED4 (includes EG:29079),MED6 (includes EG:10001),MED7 (includes EG:171285),MN1,NR2C2AP,NR4A2,NRIP1,NXF1,OSBPL1A,PPARG,RANBP3,RNF14,RUNX1,RXRA,SMAD3,SMARCA4,SP1,SREBF1,STAT1,STAT2,TP53BP1,TRRAP,ZBE…
Cellular Development	angiogenesis of lung cell lines	5.16E-04	8.93E-03	3	ERBB2,NRG1 (includes EG:112400),VEGFA
Cardiovascular System Development and Function	angiogenesis of lung cell lines	5.16E-04	8.93E-03	3	ERBB2,NRG1 (includes EG:112400),VEGFA
Organismal Development	angiogenesis of lung cell lines	5.16E-04	8.93E-03	3	ERBB2,NRG1 (includes EG:112400),VEGFA
Respiratory System Development and Function	angiogenesis of lung cell lines	5.16E-04	8.93E-03	3	ERBB2,NRG1 (includes EG:112400),VEGFA
Cell Cycle	arrest in G2/M phase transition of breast cancer cell lines	5.16E-04	8.93E-03	3	CCND1,CDK1,NRG1 (includes EG:112400)
Cellular Growth and Proliferation	proliferation of cytotoxic T cells	5.16E-04	8.93E-03	3	CD83,IL1B,IL6
Hematological System Development and Function	proliferation of cytotoxic T cells	5.16E-04	8.93E-03	3	CD83,IL1B,IL6
Hematological System Development and Function	quantity of mast cells	5.16E-04	8.93E-03	3	IL6,KITLG,NGF
Inflammatory Response	quantity of mast cells	5.16E-04	8.93E-03	3	IL6,KITLG,NGF
Tissue Morphology	quantity of mast cells	5.16E-04	8.93E-03	3	IL6,KITLG,NGF
Hypersensitivity Response	quantity of mast cells	5.16E-04	8.93E-03	3	IL6,KITLG,NGF
Cancer	tumorigenesis of pancreatic cancer cell lines	5.16E-04	8.93E-03	3	CDH2,IL6,MUC1
Cell Cycle	interphase of leukemia cell lines	5.29E-04	9.12E-03	8	CDK2,CDKN2B,CEBPA,CEBPD,CHKA,KITLG,MYB,STAT1
Cell Death	cell death of lymphoblastoid cell lines	5.36E-04	9.21E-03	9	BAX,BMP2,CASP2,CDKN1A,CDKN2C,CHEK1,IL6,PCNA,SOD2
Cancer	cervical cancer	5.39E-04	9.23E-03	28	CDH2,CDK4,CTSF,CTSH,DKK1,ERBB2,HSP90AA1,HSP90AB1,MCM2,MCM7,MMP10,MMP12,PDGFRA,POLE2,POR,RRM1,RRM2,RXRA,SERPINC1,SSTR1,TOP2A,TPM1 (includes EG:22003),TUBB2A,TUBE1,TUBG1,TYMS,VEGFA,XPO1
Reproductive System Disease	cervical cancer	5.39E-04	9.23E-03	28	CDH2,CDK4,CTSF,CTSH,DKK1,ERBB2,HSP90AA1,HSP90AB1,MCM2,MCM7,MMP10,MMP12,PDGFRA,POLE2,POR,RRM1,RRM2,RXRA,SERPINC1,SSTR1,TOP2A,TPM1 (includes EG:22003),TUBB2A,TUBE1,TUBG1,TYMS,VEGFA,XPO1
Cell Cycle	delay in cell cycle progression of lymphoblastoid cell lines	5.43E-04	9.23E-03	4	BAX,CASP2,CDKN1A,PCNA
Cell Cycle	mitotic exit	5.43E-04	9.23E-03	4	BIRC5,CDC20,MAD2L1,UBE2C
Cellular Growth and Proliferation	growth of breast cell lines	5.53E-04	9.36E-03	11	C8orf4,CCND1,CDK2,EPHA2,ERBB2,ETS2,HSPB8,NRG1 (includes EG:112400),RELB,SMYD4,YAP1 (includes EG:10413)
Cellular Development	growth of breast cell lines	5.53E-04	9.36E-03	11	C8orf4,CCND1,CDK2,EPHA2,ERBB2,ETS2,HSPB8,NRG1 (includes EG:112400),RELB,SMYD4,YAP1 (includes EG:10413)
Reproductive System Development and Function	growth of breast cell lines	5.53E-04	9.36E-03	11	C8orf4,CCND1,CDK2,EPHA2,ERBB2,ETS2,HSPB8,NRG1 (includes EG:112400),RELB,SMYD4,YAP1 (includes EG:10413)
Cell Cycle	interphase of cervical cancer cell lines	5.70E-04	9.62E-03	12	CCNA2,CHEK1,CSE1L,GADD45A,MCM10 (includes EG:307126),NRIP1,PITX2,PPP2CB,REV1 (includes EG:316344),SNX33,TCP1,XPC
Cancer	chronic leukemia	5.81E-04	9.77E-03	27	BAX,BCL2L1,BCL6,CCND1,CD24,CD55,CD59 (includes EG:25407),CDK1,CDK2,CDK4,CDK6,CDK7,CDK9,CDKN1A,EPHA2,FNTB,GATA2,HMGCR,IL1B,PDGFRA,PNP,PRIM1,RRM1,RRM2,RUNX1,TOP2A,VEGFA
Hematological Disease	chronic leukemia	5.81E-04	9.77E-03	27	BAX,BCL2L1,BCL6,CCND1,CD24,CD55,CD59 (includes EG:25407),CDK1,CDK2,CDK4,CDK6,CDK7,CDK9,CDKN1A,EPHA2,FNTB,GATA2,HMGCR,IL1B,PDGFRA,PNP,PRIM1,RRM1,RRM2,RUNX1,TOP2A,VEGFA
Cellular Movement	invasion of endothelial cells	5.91E-04	9.91E-03	5	ANPEP,FGF2,RGS4,VEGFA,VEGFC
Cellular Growth and Proliferation	proliferation of lung cancer cell lines	6.26E-04	1.04E-02	20	APAF1,BAX,CASP2,CDK2,CDK4,CDKN1A,CEBPA,CHEK1,CYR61,DNAJB4,EPHA2,FGF2,ID1,IKBKG,KITLG,NRG1 (includes EG:112400),OSGIN1,PDGFRA,PTGER4,SNIP1
Cell Death	apoptosis of sarcoma cells	6.32E-04	1.05E-02	10	ANPEP,BCL2L1,CASP2,CD24,IL6,LPAR1,MUC1,PARP1,TNFRSF10B,VEGFC
Cellular Development	maturation of leukocytes	6.32E-04	1.05E-02	10	CD44 (includes EG:100330801),CD83,HSPA1A/HSPA1B,HSPD1,IL1B,IL6,KITLG,NGF,STAT1,TNFSF9
Hematopoiesis	maturation of leukocytes	6.32E-04	1.05E-02	10	CD44 (includes EG:100330801),CD83,HSPA1A/HSPA1B,HSPD1,IL1B,IL6,KITLG,NGF,STAT1,TNFSF9
Cancer	metastatic breast cancer	6.34E-04	1.05E-02	14	ERBB2,FNTB,PDGFRA,POLE2,POR,RRM1,RRM2,SMAD3,TNFRSF10B,TOP2A,TUBB2A,TUBE1,TUBG1,TYMS
Reproductive System Disease	metastatic breast cancer	6.34E-04	1.05E-02	14	ERBB2,FNTB,PDGFRA,POLE2,POR,RRM1,RRM2,SMAD3,TNFRSF10B,TOP2A,TUBB2A,TUBE1,TUBG1,TYMS
Cancer	retinoblastoma	6.44E-04	1.06E-02	7	CDK1,CDK2,CDK4,CDK6,CDK7,CDK9,TOP2A
Cancer	renal cancer	6.85E-04	1.12E-02	33	AURKB,BTG2,BTG3,CD44 (includes EG:100330801),CDK1,CDK2,CDK4,CDK6,CDK7,CDK9,CHEK1,CXCL16,ERBB2,FH,FLCN,HMGCR,HSP90AA1,HSP90AB1,IL6,INHBB,MCM2,MUC1,PDGFRA,POR,PPARG,RRM2,SFRP1,TOP2A,TUBB2A,TUBE1,TUBG1,VEGFA,VEGFC
Renal and Urological Disease	renal cancer	6.85E-04	1.12E-02	33	AURKB,BTG2,BTG3,CD44 (includes EG:100330801),CDK1,CDK2,CDK4,CDK6,CDK7,CDK9,CHEK1,CXCL16,ERBB2,FH,FLCN,HMGCR,HSP90AA1,HSP90AB1,IL6,INHBB,MCM2,MUC1,PDGFRA,POR,PPARG,RRM2,SFRP1,TOP2A,TUBB2A,TUBE1,TUBG1,VEGFA,VEGFC
Cell Cycle	delay in initiation of M phase	7.02E-04	1.14E-02	6	BIRC5,ECT2,MAD2L1,NEK6,NEK7,TOP2A
Cellular Development	lifespan of cells	7.02E-04	1.14E-02	6	BCL6,CCND1,CDK4,CDK6,CDKN1A,NAMPT
Cell Death	apoptosis of organ	7.02E-04	1.14E-02	20	APAF1,BCL2L1,BMP4,C8orf4,CDH2,CDKN1A,CFLAR,EP400,ETS2,FGF2,HSPB8,IL1B,IL8,MCL1,NGF,NRG1 (includes EG:112400),PLAUR,SOD2,TNFRSF10B,UNG
Cancer	plasma cell dyscrasia	7.17E-04	1.16E-02	43	APBA3,ARHGAP1,BCLAF1,CCND1,CDC20,CDK1,CDK2,CDK4,CDK6,CDK7,CDK9,CLK1,DKK1,E2F2,FADD,FAM46C,FGF2,FNTB,GTF2B,HMGCR,HMOX1,HSP90AA1,HSP90AB1,IKBKG,IL1B,ITGB5,NEXN,ORC5 (includes EG:26429),PARP1,PCNA,PDE5A,PDGFRA,PTPRF,RANBP3,RCC1,RRM1,SOD2,STIP1,STX11,TNFAIP3,TYMS,VEGFA,XIRP1
Hematological Disease	plasma cell dyscrasia	7.17E-04	1.16E-02	43	APBA3,ARHGAP1,BCLAF1,CCND1,CDC20,CDK1,CDK2,CDK4,CDK6,CDK7,CDK9,CLK1,DKK1,E2F2,FADD,FAM46C,FGF2,FNTB,GTF2B,HMGCR,HMOX1,HSP90AA1,HSP90AB1,IKBKG,IL1B,ITGB5,NEXN,ORC5 (includes EG:26429),PARP1,PCNA,PDE5A,PDGFRA,PTPRF,RANBP3,RCC1,RRM1,SOD2,STIP1,STX11,TNFAIP3,TYMS,VEGFA,XIRP1
Immunological Disease	plasma cell dyscrasia	7.17E-04	1.16E-02	43	APBA3,ARHGAP1,BCLAF1,CCND1,CDC20,CDK1,CDK2,CDK4,CDK6,CDK7,CDK9,CLK1,DKK1,E2F2,FADD,FAM46C,FGF2,FNTB,GTF2B,HMGCR,HMOX1,HSP90AA1,HSP90AB1,IKBKG,IL1B,ITGB5,NEXN,ORC5 (includes EG:26429),PARP1,PCNA,PDE5A,PDGFRA,PTPRF,RANBP3,RCC1,RRM1,SOD2,STIP1,STX11,TNFAIP3,TYMS,VEGFA,XIRP1
Cellular Growth and Proliferation	arrest in growth of cells	7.21E-04	1.16E-02	19	CCND1,CDK2,CDK4,CDKN1A,CDKN2B,DAB2,ETS2,GDF15,HMOX1,IL1B,IL6,KLF4,MUC1,NRP1 (includes EG:18186),RUNX1,SMARCA4,SOCS1,STAT1,TAF7
Cellular Growth and Proliferation	growth of tumor cells	7.30E-04	1.17E-02	18	CCND1,CDKN1A,CHEK1,DCN,DDIT3,DUS2L,ERBB2,FGF2,IL1B,INHBB,MUC1,NGF,NR4A2,RXRA,SLC3A2,SMAD3,VEGFA,ZMAT3
Cellular Development	growth of tumor cells	7.30E-04	1.17E-02	18	CCND1,CDKN1A,CHEK1,DCN,DDIT3,DUS2L,ERBB2,FGF2,IL1B,INHBB,MUC1,NGF,NR4A2,RXRA,SLC3A2,SMAD3,VEGFA,ZMAT3
RNA Post-Transcriptional Modification	splicing of RNA	7.30E-04	1.17E-02	18	CLK1,CLK2,CLP1 (includes EG:10978),DDX39B,EFTUD2,GEMIN6,HCFC1,HNRNPH1,IVNS1ABP,MBNL1,MBNL2,PRPF31,RBM38,RP9,SLU7 (includes EG:10569),SRSF1,SRSF4,TSEN2
Cellular Growth and Proliferation	colony formation of tumor cell lines	7.61E-04	1.21E-02	31	ANKRD1,ATF3,BCL2L1,CDKN1A,CYR61,ERBB2,FGF2,GADD45A,GADD45B,GADD45G,HSPA1A/HSPA1B,IL6,IP6K2,KITLG,KLF4,MAD2L1,MST4,NEK6,NRG1 (includes EG:112400),PBK,PSRC1,RASD1,RNF34,RRAD,RRM2,SERTAD1,SIVA1,SOD2,SP1,TSPYL2,VEGFA
Cell Death	cell death of neuroblastoma cell lines	7.87E-04	1.25E-02	20	BCL2L1,BDNF,BIRC5,CDKN1A,CFH,CREB3L2,DDIT3,DNAJB1,FADD,GAL,GPR37,HSPA1A/HSPA1B,IGFBP5,IL1B,NGF,PARP1,SQSTM1,TGM2,TNFRSF10B,VEGFA
Cancer	primitive neuroectodermal tumor	7.87E-04	1.25E-02	20	CCND1,CD44 (includes EG:100330801),CDK1,CDK2,CDK4,CDK6,CDK7,CDK9,ERBB2,KHDRBS3,KIF1B,PDGFRA,POR,RXRA,TOP2A,TUBB2A,TUBE1,TUBG1,TYMS,WNT5A
Reproductive System Disease	primitive neuroectodermal tumor	7.87E-04	1.25E-02	20	CCND1,CD44 (includes EG:100330801),CDK1,CDK2,CDK4,CDK6,CDK7,CDK9,ERBB2,KHDRBS3,KIF1B,PDGFRA,POR,RXRA,TOP2A,TUBB2A,TUBE1,TUBG1,TYMS,WNT5A
Cell Death	neuronal cell death	8.11E-04	1.28E-02	19	BAX,BCL2L1,BDNF,BMP2,EFNB2,ETS2,HERPUD1,IL6,NGF,NRG1 (includes EG:112400),SDHA (includes EG:157074),SERPINF1,SNCAIP,SOD2,SP1,SP3,UNG,VEGFA,WFS1
Cell Cycle	arrest in G2 phase	8.27E-04	1.30E-02	18	CCNA2,CCND1,CDK1,CDKN1A,CEBPA,CHEK1,CSE1L,FADD,GADD45A,IGFBP5,IL6,MAD2L1,NRG1 (includes EG:112400),PPM1A,PPP2CB,TCP1,TP53BP1,XPC
Cellular Development	differentiation of red blood cells	8.28E-04	1.30E-02	11	BCL2L1,BMP4,CDK6,CEBPA,DYRK3,ETV6,HOXA10,HOXA5,MAFB,MYB,TNFRSF10B
Hematological System Development and Function	differentiation of red blood cells	8.28E-04	1.30E-02	11	BCL2L1,BMP4,CDK6,CEBPA,DYRK3,ETV6,HOXA10,HOXA5,MAFB,MYB,TNFRSF10B
Hematopoiesis	differentiation of red blood cells	8.28E-04	1.30E-02	11	BCL2L1,BMP4,CDK6,CEBPA,DYRK3,ETV6,HOXA10,HOXA5,MAFB,MYB,TNFRSF10B
Cancer	hyperplasia	8.81E-04	1.38E-02	20	BIRC5,CD24,CEBPD,ERN1,ETV5,GPX3,HBEGF,HMOX1,HN1,HSPA8,MALL,NGF,PCBD1,PDE5A,PLAUR,PPARG,RACGAP1,RANBP1,STAT1,UPP1
Cancer	Kaposi's sarcoma	8.86E-04	1.38E-02	9	ANGPTL4,IL6,POR,RXRA,TOP2A,TUBB2A,TUBE1,TUBG1,VEGFA
Dermatological Diseases and Conditions	Kaposi's sarcoma	8.86E-04	1.38E-02	9	ANGPTL4,IL6,POR,RXRA,TOP2A,TUBB2A,TUBE1,TUBG1,VEGFA
Cellular Growth and Proliferation	colony formation of lung cancer cell lines	8.86E-04	1.38E-02	9	CDKN1A,CYR61,GADD45A,GADD45B,GADD45G,PSRC1,RASD1,RNF34,SOD2
Cellular Growth and Proliferation	growth of colon cancer cell lines	9.34E-04	1.44E-02	18	AHSA1,BCL2L1,BIRC5,BMP2,BMP4,CCND1,CDKN1A,CDT1,CSE1L,DUSP5,EGR2,ENC1,GADD45A,KCNH1,KLF4,MUC1,NRG1 (includes EG:112400),PPARG
Cellular Development	growth of colon cancer cell lines	9.34E-04	1.44E-02	18	AHSA1,BCL2L1,BIRC5,BMP2,BMP4,CCND1,CDKN1A,CDT1,CSE1L,DUSP5,EGR2,ENC1,GADD45A,KCNH1,KLF4,MUC1,NRG1 (includes EG:112400),PPARG
Cell Cycle	arrest in G2/M phase transition of tumor cell lines	9.39E-04	1.44E-02	8	CCNA2,CCND1,CDK1,CDKN1A,CEBPA,GADD45A,MAD2L1,NRG1 (includes EG:112400)
Cell Cycle	arrest in M phase	9.39E-04	1.44E-02	8	CCDC99,CDC20,ECT2,FBXO5,MAD2L1,NEK6,NEK7,ZFYVE26
Cancer	intestinal cancer	9.40E-04	1.44E-02	16	CDK1,CDK2,CDK4,CDK6,CDK7,CDK9,HMGCR,HSP90AA1,HSP90AB1,ITGB5,PDGFRA,RRM1,SSTR1,TUBB2A,TUBE1,TUBG1
Gastrointestinal Disease	intestinal cancer	9.40E-04	1.44E-02	16	CDK1,CDK2,CDK4,CDK6,CDK7,CDK9,HMGCR,HSP90AA1,HSP90AB1,ITGB5,PDGFRA,RRM1,SSTR1,TUBB2A,TUBE1,TUBG1
Cell Signaling	I-kappaB kinase/NF-kappaB cascade	9.45E-04	1.44E-02	17	BCL3,CXXC5,DNAJA3,ECM1 (includes EG:100332249),ECT2,GPR89A/GPR89B,HMOX1,IKBKG,IL1B,NEK6,NUP62,PLK2,PPM1A,SQSTM1,STAT1,TICAM2,ZDHHC17
Cancer	glioma	9.75E-04	1.49E-02	25	CDK4,CDK6,CDKN2B,CDKN2C,CLEC2D,CLK2,CXCL16,ECT2,ENC1,EPHA2,ERBB2,FGF2,HBEGF,HSPA5,ITGB5,LPAR1,MARCKS,NEK6,PDGFRA,PPARG,SLC9A3R1,TOP2A,TYMS,UBE2C,VEGFA
Neurological Disease	glioma	9.75E-04	1.49E-02	25	CDK4,CDK6,CDKN2B,CDKN2C,CLEC2D,CLK2,CXCL16,ECT2,ENC1,EPHA2,ERBB2,FGF2,HBEGF,HSPA5,ITGB5,LPAR1,MARCKS,NEK6,PDGFRA,PPARG,SLC9A3R1,TOP2A,TYMS,UBE2C,VEGFA
Cellular Growth and Proliferation	growth of embryonic cell lines	9.78E-04	1.49E-02	10	ABCC5,BIRC5,CDKN1A,CHKA,DLGAP5,ENC1,MST4,NDUFAB1,PPM1A,QPCT
Cellular Development	growth of embryonic cell lines	9.78E-04	1.49E-02	10	ABCC5,BIRC5,CDKN1A,CHKA,DLGAP5,ENC1,MST4,NDUFAB1,PPM1A,QPCT
Embryonic Development	growth of embryonic cell lines	9.78E-04	1.49E-02	10	ABCC5,BIRC5,CDKN1A,CHKA,DLGAP5,ENC1,MST4,NDUFAB1,PPM1A,QPCT
Cellular Function and Maintenance	cellular homeostasis	9.85E-04	1.49E-02	63	AHR,ANGPT1,APAF1,ATF4,BAIAP2,BAX,BCL2L1,BIRC2,BIRC5,BMP4,CASP2,CCL2,CDKN1A,CFLAR,CHEK1,CLMP,DAPK3,DDIT3,DNAJB1,EEF2K,EIF2AK3,ENPP1,EPHA2,ERN1,FADD,FOXA3,GABBR2,GPR37,HERPUD1,HSPA4,HSPD1,IKBKG,IL1B,IL6,IL7R,IL8,ITSN1,KITLG,MAP1LC3B,MCL1,MLLT11,MMP10,MOAP1,MT2A,NDUFAB1,NT5E,PAPOLA,PARP1,PMAIP1,PNP,PPARG,PRKAA1,PTGER2,SLC8A1,SOD2,SQSTM1,SRXN1,SST,STC1,TNFRSF10B,TNFSF4,VEGFA,WFS1
Cell-To-Cell Signaling and Interaction	binding of tumor cells	1.01E-03	1.52E-02	5	CD14,CD24,CD44 (includes EG:100330801),IGFBP5,PLAUR
Cellular Development	differentiation of chondrocytes	1.01E-03	1.52E-02	5	BMP2,GADD45B,PTHLH,SOX9,STC1
Connective Tissue Development and Function	differentiation of chondrocytes	1.01E-03	1.52E-02	5	BMP2,GADD45B,PTHLH,SOX9,STC1
Cellular Growth and Proliferation	formation of endothelial cells	1.01E-03	1.52E-02	5	CCL2,FGF2,IL8,SERPINF1,VEGFA
Cardiovascular System Development and Function	formation of endothelial cells	1.01E-03	1.52E-02	5	CCL2,FGF2,IL8,SERPINF1,VEGFA
Cancer	brain cancer	1.02E-03	1.53E-02	35	BAX,CCND1,CDK4,CDK6,CDKN2B,CDKN2C,CLEC2D,CLK2,CXCL16,ECT2,ENC1,EPHA2,ERBB2,FGF2,FNTB,HBEGF,HMGCR,HSPA5,ITGB5,KHDRBS3,LPAR1,MARCKS,MCL1,NEK6,PDGFRA,PPARG,SLC9A3R1,SOCS1,TOP2A,TUBB2A,TUBE1,TUBG1,TYMS,UBE2C,VEGFA
Neurological Disease	brain cancer	1.02E-03	1.53E-02	35	BAX,CCND1,CDK4,CDK6,CDKN2B,CDKN2C,CLEC2D,CLK2,CXCL16,ECT2,ENC1,EPHA2,ERBB2,FGF2,FNTB,HBEGF,HMGCR,HSPA5,ITGB5,KHDRBS3,LPAR1,MARCKS,MCL1,NEK6,PDGFRA,PPARG,SLC9A3R1,SOCS1,TOP2A,TUBB2A,TUBE1,TUBG1,TYMS,UBE2C,VEGFA
Genetic Disorder	Huntington's disease	1.03E-03	1.53E-02	70	ACOT11,ALAS1,ANKRD11,ATP1A1,B3GNT2,BAIAP2,BAX,BCL6,BDNF,BHLHE40,BIRC2,CASP2,CD44 (includes EG:100330801),CDK5R1,CFLAR,CHAF1B,CHN1,CRYAB,CYTH1,DDIT3,DIO2,DUSP5,ETV5,FGF2,FLRT2,GABRE,HBP1,HERPUD1,HMGCR,HMOX1,HNRPDL,HSP90AA1,HSPA1A/HSPA1B,HSPA5,ID3 (includes EG:15903),IL6,IP6K2,IVNS1ABP,KCNK2,LMCD1,MAFF,MBNL2,MEIS2,MLF1,MT1E,MT1G,MT2A,PARP1,PCDH7,PCNA,PLK2,PPARG,PRDX6,RARRES3,RELB,REV1 (includes EG:…
Neurological Disease	Huntington's disease	1.03E-03	1.53E-02	70	ACOT11,ALAS1,ANKRD11,ATP1A1,B3GNT2,BAIAP2,BAX,BCL6,BDNF,BHLHE40,BIRC2,CASP2,CD44 (includes EG:100330801),CDK5R1,CFLAR,CHAF1B,CHN1,CRYAB,CYTH1,DDIT3,DIO2,DUSP5,ETV5,FGF2,FLRT2,GABRE,HBP1,HERPUD1,HMGCR,HMOX1,HNRPDL,HSP90AA1,HSPA1A/HSPA1B,HSPA5,ID3 (includes EG:15903),IL6,IP6K2,IVNS1ABP,KCNK2,LMCD1,MAFF,MBNL2,MEIS2,MLF1,MT1E,MT1G,MT2A,PARP1,PCDH7,PCNA,PLK2,PPARG,PRDX6,RARRES3,RELB,REV1 (includes EG:…
Skeletal and Muscular Disorders	Huntington's disease	1.03E-03	1.53E-02	70	ACOT11,ALAS1,ANKRD11,ATP1A1,B3GNT2,BAIAP2,BAX,BCL6,BDNF,BHLHE40,BIRC2,CASP2,CD44 (includes EG:100330801),CDK5R1,CFLAR,CHAF1B,CHN1,CRYAB,CYTH1,DDIT3,DIO2,DUSP5,ETV5,FGF2,FLRT2,GABRE,HBP1,HERPUD1,HMGCR,HMOX1,HNRPDL,HSP90AA1,HSPA1A/HSPA1B,HSPA5,ID3 (includes EG:15903),IL6,IP6K2,IVNS1ABP,KCNK2,LMCD1,MAFF,MBNL2,MEIS2,MLF1,MT1E,MT1G,MT2A,PARP1,PCDH7,PCNA,PLK2,PPARG,PRDX6,RARRES3,RELB,REV1 (includes EG:…
Cell Cycle	arrest in G2 phase of breast cancer cell lines	1.05E-03	1.55E-02	6	CCND1,CDK1,CHEK1,FADD,IGFBP5,NRG1 (includes EG:112400)
Cellular Movement	cell movement of bone marrow cells	1.05E-03	1.55E-02	6	BCAR1,CCL2,IL6,NRG1 (includes EG:112400),PDGFRA,PGF
Hematopoiesis	cell movement of bone marrow cells	1.05E-03	1.55E-02	6	BCAR1,CCL2,IL6,NRG1 (includes EG:112400),PDGFRA,PGF
Immune Cell Trafficking	cell movement of bone marrow cells	1.05E-03	1.55E-02	6	BCAR1,CCL2,IL6,NRG1 (includes EG:112400),PDGFRA,PGF
Inflammatory Response	cell movement of bone marrow cells	1.05E-03	1.55E-02	6	BCAR1,CCL2,IL6,NRG1 (includes EG:112400),PDGFRA,PGF
Cell Death	apoptosis of connective tissue cells	1.07E-03	1.58E-02	16	ATF3,BAX,BCL2L1,BIRC2,BMP2,BMP4,CD44 (includes EG:100330801),CDKN1A,CFLAR,IL1B,MCL1,NGF,PPARG,SFRP1,TNFRSF10B,TNFRSF11B
Cellular Assembly and Organization	growth of plasma membrane projections	1.10E-03	1.61E-02	13	BDNF,BMP4,CSNK1D,EFNB1,EFNB2,FGF2,FKBP4,IL6,NGF,NRG1 (includes EG:112400),SNX33,TGM2,VEGFA
Cell Cycle	ploidy	1.10E-03	1.61E-02	13	AURKB,BIRC5,CDK7,CDKN1A,CEBPD,CKAP2,CLK1,DCLK2,EIF2AK3,ERBB2,MAD2L1,MST4,TOP2A
Cell Cycle	entry into S phase of tumor cell lines	1.12E-03	1.64E-02	9	BHLHE40,CCND1,HMOX1,IL1B,IL6,MCM10 (includes EG:307126),MEIS2,NRG1 (includes EG:112400),SSTR1
Cell Cycle	ploidy of cells	1.17E-03	1.69E-02	12	AURKB,BIRC5,CDK7,CDKN1A,CEBPD,CKAP2,CLK1,DCLK2,EIF2AK3,ERBB2,MAD2L1,MST4
Cell Cycle	G0/G1 phase transition of leukemia cell lines	1.19E-03	1.69E-02	4	CEBPD,CHKA,KITLG,STAT1
Cell Cycle	arrest in G0/G1 phase transition of breast cancer cell lines	1.19E-03	1.69E-02	4	CDKN1A,IL1B,IL6,RXRA
Cellular Development	differentiation of progenitor cells	1.19E-03	1.69E-02	4	BMP4,IL6,KITLG,MLLT11
Cellular Assembly and Organization	formation of nucleus	1.19E-03	1.69E-02	4	CDKN1A,LMNB1,PCNT,SERTAD1
Cellular Development	maturation of megakaryocytes	1.19E-03	1.69E-02	4	BIRC5,CCND1,CDKN1A,KITLG
Hematological System Development and Function	maturation of megakaryocytes	1.19E-03	1.69E-02	4	BIRC5,CCND1,CDKN1A,KITLG
Hematopoiesis	maturation of megakaryocytes	1.19E-03	1.69E-02	4	BIRC5,CCND1,CDKN1A,KITLG
Cell Cycle	mitogenesis of fibroblasts	1.19E-03	1.69E-02	4	FGF2,HBEGF,IL11,IL6
Connective Tissue Development and Function	mitogenesis of fibroblasts	1.19E-03	1.69E-02	4	FGF2,HBEGF,IL11,IL6
Cell Cycle	senescence of breast cancer cell lines	1.19E-03	1.69E-02	4	BHLHE40,ID1,PARP1,RRAD
Cancer	heart and pleura tumor	1.20E-03	1.71E-02	10	ANGPTL4,EPHA2,IL6,POR,RXRA,TOP2A,TUBB2A,TUBE1,TUBG1,VEGFA
Cellular Growth and Proliferation	arrest in growth of tumor cell lines	1.21E-03	1.72E-02	15	CCND1,CDK2,CDK4,CDKN1A,CDKN2B,DAB2,GDF15,HMOX1,IL6,KLF4,MUC1,RUNX1,SMARCA4,STAT1,TAF7
Cellular Development	arrest in growth of tumor cell lines	1.21E-03	1.72E-02	15	CCND1,CDK2,CDK4,CDKN1A,CDKN2B,DAB2,GDF15,HMOX1,IL6,KLF4,MUC1,RUNX1,SMARCA4,STAT1,TAF7
Cell Cycle	G1/S phase	1.22E-03	1.72E-02	20	AHR,BIRC5,CCND1,CDCA5,CDK4,CDK6,CDKN1A,CDKN2B,CDKN2C,ERBB2,GADD45A,GADD45G,IL6,KLF4,LEF1,MT1A,MXD1,NRG1 (includes EG:112400),RCC1,SNX33
Cell Cycle	G2 phase of breast cancer cell lines	1.23E-03	1.72E-02	7	CCND1,CDK1,CHEK1,FADD,IGFBP5,NRG1 (includes EG:112400),SULF1
Cell Death	cell death of macrophages	1.23E-03	1.72E-02	7	BCL2L1,CFLAR,MCL1,NGF,PMAIP1,PPARG,SOD2
Cell Death	colony survival of cells	1.23E-03	1.72E-02	7	BCL2L1,CCND1,CDKN1A,CHEK1,FANCG,PARP1,PDRG1
Cellular Function and Maintenance	colony survival of cells	1.23E-03	1.72E-02	7	BCL2L1,CCND1,CDKN1A,CHEK1,FANCG,PARP1,PDRG1
Cancer	acute myeloid leukemia	1.28E-03	1.79E-02	25	ASXL1,AURKB,CDKN2B,CEBPA,EPHA2,ERBB2,ETV6,FNTB,HLX,IDH1,IL1B,LPP,MKL1,MLF1,MLLT10,MN1,PDGFRA,PLAGL2,POR,RAD51,RRM1,RUNX1,RXRA,TOP2A,UBE2I
Genetic Disorder	acute myeloid leukemia	1.28E-03	1.79E-02	25	ASXL1,AURKB,CDKN2B,CEBPA,EPHA2,ERBB2,ETV6,FNTB,HLX,IDH1,IL1B,LPP,MKL1,MLF1,MLLT10,MN1,PDGFRA,PLAGL2,POR,RAD51,RRM1,RUNX1,RXRA,TOP2A,UBE2I
Hematological Disease	acute myeloid leukemia	1.28E-03	1.79E-02	25	ASXL1,AURKB,CDKN2B,CEBPA,EPHA2,ERBB2,ETV6,FNTB,HLX,IDH1,IL1B,LPP,MKL1,MLF1,MLLT10,MN1,PDGFRA,PLAGL2,POR,RAD51,RRM1,RUNX1,RXRA,TOP2A,UBE2I
Respiratory Disease	severe acute respiratory syndrome	1.36E-03	1.89E-02	20	ACSL1,ACTN1,ANPEP,BCL3,CD24,CEBPD,GSTO1,HIST1H2AC,HIST1H2BJ/HIST1H2BK,HIST2H2AA3/HIST2H2AA4,HLX,IL6,IMPA2,LEF1,MED16,MXD1,RRM2,S100P,SLC2A3,TROVE2
Infectious Disease	severe acute respiratory syndrome	1.36E-03	1.89E-02	20	ACSL1,ACTN1,ANPEP,BCL3,CD24,CEBPD,GSTO1,HIST1H2AC,HIST1H2BJ/HIST1H2BK,HIST2H2AA3/HIST2H2AA4,HLX,IL6,IMPA2,LEF1,MED16,MXD1,RRM2,S100P,SLC2A3,TROVE2
Cancer	childhood solid tumor	1.39E-03	1.92E-02	16	CDK1,CDK2,CDK4,CDK6,CDK7,CDK9,EPHA2,POLE2,RRM1,RRM2,TOP2A,TUBB2A,TUBE1,TUBG1,TYMS,VEGFA
Immunological Disease	polyarticular juvenile rheumatoid arthritis	1.39E-03	1.92E-02	16	BCL6,CD83,DUSP2,FOSB,GADD45B,HSPA1A/HSPA1B,HSPB8,IL1B,IL6,MCL1,NR4A2,PLAUR,PTGS1,RPL32,SOCS1,TNFAIP3
Skeletal and Muscular Disorders	polyarticular juvenile rheumatoid arthritis	1.39E-03	1.92E-02	16	BCL6,CD83,DUSP2,FOSB,GADD45B,HSPA1A/HSPA1B,HSPB8,IL1B,IL6,MCL1,NR4A2,PLAUR,PTGS1,RPL32,SOCS1,TNFAIP3
Connective Tissue Disorders	polyarticular juvenile rheumatoid arthritis	1.39E-03	1.92E-02	16	BCL6,CD83,DUSP2,FOSB,GADD45B,HSPA1A/HSPA1B,HSPB8,IL1B,IL6,MCL1,NR4A2,PLAUR,PTGS1,RPL32,SOCS1,TNFAIP3
Inflammatory Disease	polyarticular juvenile rheumatoid arthritis	1.39E-03	1.92E-02	16	BCL6,CD83,DUSP2,FOSB,GADD45B,HSPA1A/HSPA1B,HSPB8,IL1B,IL6,MCL1,NR4A2,PLAUR,PTGS1,RPL32,SOCS1,TNFAIP3
Cellular Growth and Proliferation	growth of epithelial cells	1.40E-03	1.93E-02	9	CCND1,CDK4,CDKN1A,ERBB2,ETS2,FGF2,HBEGF,IL11,SMAD3
Neurological Disease	mild cognitive impairment	1.40E-03	1.93E-02	9	BAX,CCL2,IL8,NGF,PCNA,PPARG,TUBB2A,TUBE1,TUBG1
Cancer	neuroectodermal tumor	1.42E-03	1.95E-02	21	CCND1,CD44 (includes EG:100330801),CDK1,CDK2,CDK4,CDK6,CDK7,CDK9,ERBB2,KHDRBS3,KIF1B,PDGFRA,POR,RXRA,TOP2A,TUBB2A,TUBE1,TUBG1,TYMS,VEGFA,WNT5A
Reproductive System Disease	neuroectodermal tumor	1.42E-03	1.95E-02	21	CCND1,CD44 (includes EG:100330801),CDK1,CDK2,CDK4,CDK6,CDK7,CDK9,ERBB2,KHDRBS3,KIF1B,PDGFRA,POR,RXRA,TOP2A,TUBB2A,TUBE1,TUBG1,TYMS,VEGFA,WNT5A
Cancer	soft tissue sarcoma	1.43E-03	1.96E-02	19	CDK4,CDK6,CDKN1A,CKS2,EPHA2,FNTB,HSP90AA1,HSP90AB1,PDGFRA,POR,PPARG,ST5,TOP2A,TUBB2A,TUBE1,TUBG1,TYMS,UBE2C,VEGFA
Post-Translational Modification	activation of protein	1.45E-03	1.97E-02	11	AMD1,BMP2,BMP4,CD55,DKK1,DLL1,IGFBP5,IL1B,IL6,JAG1,TNFRSF11B
Cell Cycle	contact growth inhibition of tumor cell lines	1.45E-03	1.97E-02	11	BIRC5,BMP4,CD24,CDKN1A,IL6,MXD1,PPP1R15A,SMAD3,SULF1,TOP2A,TTC5
Cellular Function and Maintenance	contact growth inhibition of tumor cell lines	1.45E-03	1.97E-02	11	BIRC5,BMP4,CD24,CDKN1A,IL6,MXD1,PPP1R15A,SMAD3,SULF1,TOP2A,TTC5
Cell-To-Cell Signaling and Interaction	contact growth inhibition of tumor cell lines	1.45E-03	1.97E-02	11	BIRC5,BMP4,CD24,CDKN1A,IL6,MXD1,PPP1R15A,SMAD3,SULF1,TOP2A,TTC5
Respiratory Disease	infection of respiratory tract	1.46E-03	1.98E-02	22	ACSL1,ACTN1,ANPEP,BCL3,CD24,CEBPD,GSTO1,HIST1H2AC,HIST1H2BJ/HIST1H2BK,HIST2H2AA3/HIST2H2AA4,HLX,IKBKG,IL6,IMPA2,LEF1,MED16,MXD1,PTGS1,RRM2,S100P,SLC2A3,TROVE2
Infectious Disease	infection of respiratory tract	1.46E-03	1.98E-02	22	ACSL1,ACTN1,ANPEP,BCL3,CD24,CEBPD,GSTO1,HIST1H2AC,HIST1H2BJ/HIST1H2BK,HIST2H2AA3/HIST2H2AA4,HLX,IKBKG,IL6,IMPA2,LEF1,MED16,MXD1,PTGS1,RRM2,S100P,SLC2A3,TROVE2
Cell Death	apoptosis of pancreatic cancer cell lines	1.47E-03	1.98E-02	10	BAX,BCL2L1,EPHA2,ERBB2,FADD,IL6,IL8,PRKD1,SOCS1,TBK1
Cellular Movement	migration of endothelial cell lines	1.47E-03	1.98E-02	10	ANGPTL4,CYR61,ERBB2,FGF2,IL8,NRG1 (includes EG:112400),PPAP2B,PTK2 (includes EG:14083),VEGFA,VEGFC
Cardiovascular System Development and Function	migration of endothelial cell lines	1.47E-03	1.98E-02	10	ANGPTL4,CYR61,ERBB2,FGF2,IL8,NRG1 (includes EG:112400),PPAP2B,PTK2 (includes EG:14083),VEGFA,VEGFC
Cellular Assembly and Organization	alignment of chromosomes	1.51E-03	2.03E-02	6	BIRC5,CCNA2,DLGAP5,KIF18A,KIF2C,KIFC1
DNA Replication, Recombination, and Repair	alignment of chromosomes	1.51E-03	2.03E-02	6	BIRC5,CCNA2,DLGAP5,KIF18A,KIF2C,KIFC1
Cancer	germ cell and embryonal neoplasm	1.52E-03	2.04E-02	25	CCND1,CD44 (includes EG:100330801),CDK1,CDK2,CDK4,CDK6,CDK7,CDK9,EPHA2,ERBB2,KHDRBS3,KIF1B,KITLG,PDGFRA,POR,PTGER2,PTGER4,RXRA,TOP2A,TUBB2A,TUBE1,TUBG1,TYMS,VEGFA,WNT5A
Reproductive System Disease	germ cell and embryonal neoplasm	1.52E-03	2.04E-02	25	CCND1,CD44 (includes EG:100330801),CDK1,CDK2,CDK4,CDK6,CDK7,CDK9,EPHA2,ERBB2,KHDRBS3,KIF1B,KITLG,PDGFRA,POR,PTGER2,PTGER4,RXRA,TOP2A,TUBB2A,TUBE1,TUBG1,TYMS,VEGFA,WNT5A
Protein Synthesis	polymerization of protein	1.54E-03	2.06E-02	17	AKR1C1/AKR1C2,BAX,BCL10,CRYAB,CTH,CUTC,ECT2,EIF2AK3,GCH1,GPX3,HMOX1,PEX14 (includes EG:40294),PMAIP1,QPRT,RAD51,SHMT1,SOD2
Cell Morphology	morphology of cells	1.56E-03	2.07E-02	30	AMD1,BAX,CCND1,CD44 (includes EG:100330801),CD59 (includes EG:25407),CDKN1A,CEBPA,CFLAR,CSK,DAPK3,EFNB1,ERBB2,FGF2,GDF15,IL1B,IL6,KITLG,KLF4,MUC1,NRG1 (includes EG:112400),PHLDA1,PLAGL1,PLAUR,PTK2 (includes EG:14083),PTPN14,SNAI1,SOD2,STARD13,TPM1 (includes EG:22003),VEGFA
Cardiovascular System Development and Function	formation of endothelial tube	1.57E-03	2.07E-02	8	CCL2,CD44 (includes EG:100330801),FGF2,IL8,KLF2,PLAUR,SERPINF1,VEGFA
Tissue Development	formation of endothelial tube	1.57E-03	2.07E-02	8	CCL2,CD44 (includes EG:100330801),FGF2,IL8,KLF2,PLAUR,SERPINF1,VEGFA
Cancer	mesothelioma	1.57E-03	2.07E-02	16	CDH2,EPHA2,ERBB2,HSP90AA1,HSP90AB1,KITLG,PDGFRA,POR,SFRP1,SNAI1,TOP2A,TUBB2A,TUBE1,TUBG1,TYMS,UHRF1
Cellular Growth and Proliferation	proliferation of epithelial cells	1.57E-03	2.07E-02	16	BIRC2,CCND1,CDK6,CDKN2B,ERBB2,ID1,IL1B,IL6,KCNK2,MMP12,PDE5A,PTHLH,RGS4,SFRP1,TAC1,YAP1 (includes EG:10413)
Cellular Growth and Proliferation	proliferation of leukemia cell lines	1.57E-03	2.07E-02	16	BCL2L1,BIRC2,CD44 (includes EG:100330801),CDKN1A,CEBPA,ETV6,FGF2,HMOX1,IGBP1,IL11,IL1B,KITLG,KLF2,NKX3-1,VEGFA,VEGFC
Cancer	small intestine cancer	1.58E-03	2.08E-02	15	CDK1,CDK2,CDK4,CDK6,CDK7,CDK9,HSP90AA1,HSP90AB1,ITGB5,PDGFRA,RRM1,SSTR1,TUBB2A,TUBE1,TUBG1
Gastrointestinal Disease	small intestine cancer	1.58E-03	2.08E-02	15	CDK1,CDK2,CDK4,CDK6,CDK7,CDK9,HSP90AA1,HSP90AB1,ITGB5,PDGFRA,RRM1,SSTR1,TUBB2A,TUBE1,TUBG1
Neurological Disease	encephalopathy	1.61E-03	2.12E-02	101	ACOT11,ADCK3,ALAS1,ANKRD11,ATP1A1,ATXN1,ATXN2,B3GNT2,BAIAP2,BAX,BCL6,BDNF,BHLHE40,BIRC2,CA2,CASP2,CCL2,CD44 (includes EG:100330801),CDK5R1,CFLAR,CHAF1B,CHN1,CRYAB,CYTH1,DDIT3,DIO2,DUSP5,ETS2,ETV5,FGF2,FLRT2,GABRE,GFM1,GLI2,HBP1,HERPUD1,HIST2H2AA3/HIST2H2AA4,HMGCR,HMOX1,HNRPDL,HSP90AA1,HSPA1A/HSPA1B,HSPA5,HSPD1,ID3 (includes EG:15903),IGBP1,IL6,IMPA2,IP6K2,IVNS1ABP,KCNK2,KIAA0020,LMCD1,LMNB1,MAFF,…
Cell Cycle	delay in cell cycle progression of tumor cell lines	1.62E-03	2.12E-02	5	BAX,BIRC5,CASP2,CDKN1A,PCNA
Cellular Growth and Proliferation	proliferation of microvascular endothelial cells	1.62E-03	2.12E-02	5	DKK1,EFNB2,IL1B,IL8,VEGFA
Cellular Development	proliferation of microvascular endothelial cells	1.62E-03	2.12E-02	5	DKK1,EFNB2,IL1B,IL8,VEGFA
Cardiovascular System Development and Function	proliferation of microvascular endothelial cells	1.62E-03	2.12E-02	5	DKK1,EFNB2,IL1B,IL8,VEGFA
Organismal Development	proliferation of microvascular endothelial cells	1.62E-03	2.12E-02	5	DKK1,EFNB2,IL1B,IL8,VEGFA
Tissue Development	proliferation of microvascular endothelial cells	1.62E-03	2.12E-02	5	DKK1,EFNB2,IL1B,IL8,VEGFA
Cell Cycle	arrest in G1 phase of breast cancer cell lines	1.65E-03	2.13E-02	7	BHLHE40,BTG2,CCND1,DCN,ERBB2,GDF15,HOXA10
Cellular Movement	cell movement of lymphatic system cells	1.65E-03	2.13E-02	7	BCAR1,CCL2,FGF2,IL6,NRG1 (includes EG:112400),PDGFRA,PGF
Immune Cell Trafficking	cell movement of lymphatic system cells	1.65E-03	2.13E-02	7	BCAR1,CCL2,FGF2,IL6,NRG1 (includes EG:112400),PDGFRA,PGF
Cellular Movement	migration of skin cell lines	1.65E-03	2.13E-02	7	CYR61,ERBB2,FGF2,NRG1 (includes EG:112400),PDGFRA,VEGFA,VEGFC
Hair and Skin Development and Function	migration of skin cell lines	1.65E-03	2.13E-02	7	CYR61,ERBB2,FGF2,NRG1 (includes EG:112400),PDGFRA,VEGFA,VEGFC
Cancer	glioblastoma	1.67E-03	2.15E-02	20	CDK4,CDK6,CDKN2C,CLEC2D,CLK2,CXCL16,ECT2,ENC1,EPHA2,ERBB2,HSPA5,ITGB5,LPAR1,MARCKS,NEK6,PDGFRA,PPARG,SLC9A3R1,UBE2C,VEGFA
Neurological Disease	glioblastoma	1.67E-03	2.15E-02	20	CDK4,CDK6,CDKN2C,CLEC2D,CLK2,CXCL16,ECT2,ENC1,EPHA2,ERBB2,HSPA5,ITGB5,LPAR1,MARCKS,NEK6,PDGFRA,PPARG,SLC9A3R1,UBE2C,VEGFA
Cellular Growth and Proliferation	growth of cervical cancer cell lines	1.73E-03	2.23E-02	13	BIRC5,CDCA4,GADD45A,HSPB8,IL6,KCNH1,MST4,NR4A2,NUDCD3,PTPN14,TFAP2C,TSPYL2,UHRF1
Cellular Development	growth of cervical cancer cell lines	1.73E-03	2.23E-02	13	BIRC5,CDCA4,GADD45A,HSPB8,IL6,KCNH1,MST4,NR4A2,NUDCD3,PTPN14,TFAP2C,TSPYL2,UHRF1
Cellular Growth and Proliferation	growth of pancreatic cancer cell lines	1.74E-03	2.23E-02	9	CCND1,ERBB2,HBEGF,IL6,KCNH1,KIF20A,SOD2,SP1,SST
Cellular Development	growth of pancreatic cancer cell lines	1.74E-03	2.23E-02	9	CCND1,ERBB2,HBEGF,IL6,KCNH1,KIF20A,SOD2,SP1,SST
Cancer	mantle cell lymphoma	1.74E-03	2.23E-02	9	CDK2,CDK4,CDK6,CDK7,CDK9,FNTB,PIM2,RRM1,TOP2A
Hematological Disease	mantle cell lymphoma	1.74E-03	2.23E-02	9	CDK2,CDK4,CDK6,CDK7,CDK9,FNTB,PIM2,RRM1,TOP2A
Cancer	epithelial ovarian cancer	1.79E-03	2.29E-02	23	BCL10,BNC1,C13orf15,CALB2,CD24,CFH,CXXC5,DAB2,FLRT2,FNTB,GPX3,HIST2H2AA3/HIST2H2AA4,HN1,KCNK6,LRP8,MUC1,PDGFRA,PTGS1,RACGAP1,STAT1,TFPI2,TXNIP,VEGFA
Genetic Disorder	epithelial ovarian cancer	1.79E-03	2.29E-02	23	BCL10,BNC1,C13orf15,CALB2,CD24,CFH,CXXC5,DAB2,FLRT2,FNTB,GPX3,HIST2H2AA3/HIST2H2AA4,HN1,KCNK6,LRP8,MUC1,PDGFRA,PTGS1,RACGAP1,STAT1,TFPI2,TXNIP,VEGFA
Reproductive System Disease	epithelial ovarian cancer	1.79E-03	2.29E-02	23	BCL10,BNC1,C13orf15,CALB2,CD24,CFH,CXXC5,DAB2,FLRT2,FNTB,GPX3,HIST2H2AA3/HIST2H2AA4,HN1,KCNK6,LRP8,MUC1,PDGFRA,PTGS1,RACGAP1,STAT1,TFPI2,TXNIP,VEGFA
Cell Death	cell death of ovarian cancer cell lines	1.80E-03	2.29E-02	15	BCL2L1,BIRC2,CDKN1A,CFLAR,DAB2,DDIT3,ERBB2,IL8,IP6K2,KLF2,MAD2L1,PMAIP1,TBK1,TNFRSF10B,TNFRSF1A
Cellular Movement	cell movement of endothelial cells	1.85E-03	2.34E-02	20	ANGPT1,BMP4,CCL2,CDH2,CYR61,DCN,DKK1,EFNB2,FGF2,HEY1,IL8,NRP1 (includes EG:18186),PGF,PRKD1,S100P,SERPINF1,STC1,VEGFA,VEGFC,WNT5A
Cardiovascular System Development and Function	cell movement of endothelial cells	1.85E-03	2.34E-02	20	ANGPT1,BMP4,CCL2,CDH2,CYR61,DCN,DKK1,EFNB2,FGF2,HEY1,IL8,NRP1 (includes EG:18186),PGF,PRKD1,S100P,SERPINF1,STC1,VEGFA,VEGFC,WNT5A
Cell Death	apoptosis of endothelial cells	1.90E-03	2.39E-02	12	CFLAR,FADD,FGF2,HSPA5,IL1B,ITSN1,SERPINC1,SERPINF1,TNFRSF10B,TNFRSF11B,TNFRSF1A,VEGFA
Protein Synthesis	oligomerization of protein	1.90E-03	2.39E-02	12	AKR1C1/AKR1C2,BAX,BCL10,CRYAB,ECT2,EIF2AK3,GCH1,HMOX1,PEX14 (includes EG:40294),PMAIP1,QPRT,RAD51
Gene Expression	binding of PPAR response element	1.94E-03	2.39E-02	3	PPARG,RXRA,SERPINF1
Cellular Development	development of embryonic cells	1.94E-03	2.39E-02	3	BDNF,FGF2,NRG1 (includes EG:112400)
Embryonic Development	development of embryonic cells	1.94E-03	2.39E-02	3	BDNF,FGF2,NRG1 (includes EG:112400)
Organismal Development	development of embryonic cells	1.94E-03	2.39E-02	3	BDNF,FGF2,NRG1 (includes EG:112400)
DNA Replication, Recombination, and Repair	initiation of synthesis of DNA	1.94E-03	2.39E-02	3	CCNA2,CDK2,CDK6
Cellular Development	lifespan of fibroblast cell lines	1.94E-03	2.39E-02	3	CDK4,CDK6,CDKN1A
Connective Tissue Development and Function	lifespan of fibroblast cell lines	1.94E-03	2.39E-02	3	CDK4,CDK6,CDKN1A
Drug Metabolism	modification of hyaluronic acid	1.94E-03	2.39E-02	3	CD44 (includes EG:100330801),HYAL2,TNFAIP6
Small Molecule Biochemistry	modification of hyaluronic acid	1.94E-03	2.39E-02	3	CD44 (includes EG:100330801),HYAL2,TNFAIP6
Carbohydrate Metabolism	modification of hyaluronic acid	1.94E-03	2.39E-02	3	CD44 (includes EG:100330801),HYAL2,TNFAIP6
Tissue Morphology	permeability of tissue	1.94E-03	2.39E-02	3	FGF2,VEGFA,VEGFC
Cell Cycle	ploidy of colon cancer cell lines	1.94E-03	2.39E-02	3	BIRC5,CKAP2,MAD2L1
Cell Death	survival of skin cell lines	1.94E-03	2.39E-02	3	FGF2,VEGFA,VEGFC
Hair and Skin Development and Function	survival of skin cell lines	1.94E-03	2.39E-02	3	FGF2,VEGFA,VEGFC
Gene Expression	transcription of mitochondrial DNA	1.94E-03	2.39E-02	3	MRPL12,POLRMT,TFB2M
Small Molecule Biochemistry	production of nitric oxide	2.04E-03	2.51E-02	11	HBEGF,HMOX1,HSPA1A/HSPA1B,HSPD1,IL1B,PRKAA1,S1PR3,SOCS1,SOD2,TAC1,VEGFA
Cell Signaling	production of nitric oxide	2.04E-03	2.51E-02	11	HBEGF,HMOX1,HSPA1A/HSPA1B,HSPD1,IL1B,PRKAA1,S1PR3,SOCS1,SOD2,TAC1,VEGFA
Cell Death	cell death of fibroblast cell lines	2.13E-03	2.62E-02	10	BCL2L1,CFLAR,CYR61,EP400,FANCD2,HSPD1,NGF,NSMCE4A,TNFRSF10B,TNFRSF1A
Cellular Function and Maintenance	autophagy of cells	2.17E-03	2.66E-02	17	ATF4,BAIAP2,BAX,BIRC2,CFLAR,CHEK1,EEF2K,EIF2AK3,ERN1,FADD,GABBR2,GPR37,IKBKG,MAP1LC3B,MMP10,PRKAA1,PTGER2
Cell Morphology	autophagy of cells	2.17E-03	2.66E-02	17	ATF4,BAIAP2,BAX,BIRC2,CFLAR,CHEK1,EEF2K,EIF2AK3,ERN1,FADD,GABBR2,GPR37,IKBKG,MAP1LC3B,MMP10,PRKAA1,PTGER2
Cell Death	apoptosis of RPE cells	2.22E-03	2.67E-02	4	BCL2L1,EP400,FGF2,PLAUR
Cell Death	apoptosis of neuroblastoma cells	2.22E-03	2.67E-02	4	ATXN2,BAX,PMAIP1,ZNF622
Cell Cycle	arrest in cytokinesis of tumor cell lines	2.22E-03	2.67E-02	4	ECT2,NEK6,NEK7,ZFYVE26
Cellular Movement	arrest in cytokinesis of tumor cell lines	2.22E-03	2.67E-02	4	ECT2,NEK6,NEK7,ZFYVE26
Cellular Assembly and Organization	chromosomal congression of chromosomes	2.22E-03	2.67E-02	4	KIF18A,KIF2C,KIFC1,NDC80
DNA Replication, Recombination, and Repair	chromosomal congression of chromosomes	2.22E-03	2.67E-02	4	KIF18A,KIF2C,KIFC1,NDC80
Cell Cycle	mitosis of hematopoietic progenitor cells	2.22E-03	2.67E-02	4	AURKB,FGF2,IL6,KITLG
Hematopoiesis	mitosis of hematopoietic progenitor cells	2.22E-03	2.67E-02	4	AURKB,FGF2,IL6,KITLG
Cell Morphology	sprouting of endothelial cells	2.22E-03	2.67E-02	4	CYR61,DCN,RGS4,VEGFA
Cardiovascular System Development and Function	sprouting of endothelial cells	2.22E-03	2.67E-02	4	CYR61,DCN,RGS4,VEGFA
Organismal Development	sprouting of endothelial cells	2.22E-03	2.67E-02	4	CYR61,DCN,RGS4,VEGFA
Cell Death	survival of lymphoblastoid cell lines	2.22E-03	2.67E-02	4	BAX,CASP2,CDKN1A,PCNA
Cancer	myeloid leukemia	2.25E-03	2.69E-02	27	ASXL1,AURKB,CDKN2B,CEBPA,EPHA2,ERBB2,ETV6,FNTB,GATA2,HLX,IDH1,IL1B,LPP,MKL1,MLF1,MLLT10,MN1,PDGFRA,PLAGL2,POR,RAD51,RRM1,RRM2,RUNX1,RXRA,TOP2A,UBE2I
Hematological Disease	myeloid leukemia	2.25E-03	2.69E-02	27	ASXL1,AURKB,CDKN2B,CEBPA,EPHA2,ERBB2,ETV6,FNTB,GATA2,HLX,IDH1,IL1B,LPP,MKL1,MLF1,MLLT10,MN1,PDGFRA,PLAGL2,POR,RAD51,RRM1,RRM2,RUNX1,RXRA,TOP2A,UBE2I
Cell Death	cell death of myeloma cell lines	2.41E-03	2.87E-02	11	BCL2L1,BMP2,BMP4,CDK1,CHEK1,IL6,MCL1,RELB,TNFRSF11B,TOP2A,XPO1
Cellular Growth and Proliferation	growth of kidney cell lines	2.41E-03	2.87E-02	11	ABCC5,BIRC5,CDKN1A,CHKA,DLGAP5,ENC1,MST4,NDUFAB1,OXTR,PPM1A,QPCT
Cellular Development	growth of kidney cell lines	2.41E-03	2.87E-02	11	ABCC5,BIRC5,CDKN1A,CHKA,DLGAP5,ENC1,MST4,NDUFAB1,OXTR,PPM1A,QPCT
Renal and Urological System Development and Function	growth of kidney cell lines	2.41E-03	2.87E-02	11	ABCC5,BIRC5,CDKN1A,CHKA,DLGAP5,ENC1,MST4,NDUFAB1,OXTR,PPM1A,QPCT
Cellular Compromise	injury of cells	2.46E-03	2.93E-02	5	CFH,FGF2,IL6,NGF,SOD2
Cellular Movement	cell movement of skin cell lines	2.50E-03	2.97E-02	8	CYR61,ERBB2,FGF2,IL8,NRG1 (includes EG:112400),PDGFRA,VEGFA,VEGFC
Hair and Skin Development and Function	cell movement of skin cell lines	2.50E-03	2.97E-02	8	CYR61,ERBB2,FGF2,IL8,NRG1 (includes EG:112400),PDGFRA,VEGFA,VEGFC
Cellular Movement	migration of breast cancer cell lines	2.52E-03	2.98E-02	21	BCAR1,BCAR3,CDH2,CSE1L,DNAJA3,ERBB2,FGF2,IL6,IL8,KISS1,NRG1 (includes EG:112400),NRP1 (includes EG:18186),OSGIN1,PLAUR,PRKD1,PTHLH,PTK2 (includes EG:14083),SDCBP,TFAP2C,UBE2I,VEGFA
Neurological Disease	dyskinesia	2.53E-03	2.99E-02	71	ACOT11,ALAS1,ANKRD11,ATP1A1,B3GNT2,BAIAP2,BAX,BCL6,BDNF,BHLHE40,BIRC2,CASP2,CD44 (includes EG:100330801),CDK5R1,CFLAR,CHAF1B,CHN1,CRYAB,CYTH1,DDIT3,DIO2,DUSP5,ETV5,FGF2,FLRT2,GABRE,HBP1,HERPUD1,HMGCR,HMOX1,HNRPDL,HSP90AA1,HSPA1A/HSPA1B,HSPA5,ID3 (includes EG:15903),IL6,IP6K2,IVNS1ABP,KCNK2,LMCD1,MAFF,MBNL2,MEIS2,MLF1,MT1E,MT1G,MT2A,PARP1,PCDH7,PCNA,PLK2,PPARG,PRDX6,RARRES3,RELB,REV1 (includes EG:…
Cancer	diffuse small-cell lymphoma	2.55E-03	3.00E-02	10	CDK2,CDK4,CDK6,CDK7,CDK9,CFLAR,FNTB,PIM2,RRM1,TOP2A
Hematological Disease	diffuse small-cell lymphoma	2.55E-03	3.00E-02	10	CDK2,CDK4,CDK6,CDK7,CDK9,CFLAR,FNTB,PIM2,RRM1,TOP2A
Cellular Assembly and Organization	growth of neurites	2.57E-03	3.02E-02	12	BDNF,BMP4,CSNK1D,EFNB1,EFNB2,FGF2,FKBP4,IL6,NGF,NRG1 (includes EG:112400),TGM2,VEGFA
Nervous System Development and Function	growth of neurites	2.57E-03	3.02E-02	12	BDNF,BMP4,CSNK1D,EFNB1,EFNB2,FGF2,FKBP4,IL6,NGF,NRG1 (includes EG:112400),TGM2,VEGFA
Cell Death	cell death of leukemia cells	2.60E-03	3.05E-02	9	ANPEP,CASP2,CD24,HMOX1,IL6,LPAR1,MUC1,TNFRSF10B,VEGFC
Cancer	T-cell non-Hodgkin's disease	2.65E-03	3.10E-02	19	BCL2L1,BIRC5,CHEK1,CYR61,DUSP5,GADD45A,GADD45B,MNT,NAV3,PDGFRA,PNP,PPARG,RGS16,TUBB,TUBB2A,TUBB2B,TUBB6,TUBE1,TUBG1
Hematological Disease	T-cell non-Hodgkin's disease	2.65E-03	3.10E-02	19	BCL2L1,BIRC5,CHEK1,CYR61,DUSP5,GADD45A,GADD45B,MNT,NAV3,PDGFRA,PNP,PPARG,RGS16,TUBB,TUBB2A,TUBB2B,TUBB6,TUBE1,TUBG1
Cardiovascular System Development and Function	angiogenesis of tissue	2.80E-03	3.27E-02	7	ADAMTS1,ANGPT1,BMP2,ECM1 (includes EG:100332249),FGF2,SERPINC1,VEGFA
Organismal Development	angiogenesis of tissue	2.80E-03	3.27E-02	7	ADAMTS1,ANGPT1,BMP2,ECM1 (includes EG:100332249),FGF2,SERPINC1,VEGFA
Tissue Development	angiogenesis of tissue	2.80E-03	3.27E-02	7	ADAMTS1,ANGPT1,BMP2,ECM1 (includes EG:100332249),FGF2,SERPINC1,VEGFA
Cell Death	apoptosis of fibroblasts	2.82E-03	3.28E-02	11	ATF3,BAX,BCL2L1,BIRC2,BMP2,BMP4,CDKN1A,CFLAR,MCL1,SFRP1,TNFRSF10B
Cell Cycle	arrest in cell cycle progression of cervical cancer cell lines	2.88E-03	3.33E-02	6	AHR,CCNA2,CDKN1A,CKS2,SMARCA4,TCP1
Cellular Assembly and Organization	formation of cellular inclusion bodies	2.88E-03	3.33E-02	6	ATXN1,DNAJA1,HSPA1A/HSPA1B,SIAH2,SNCAIP,SQSTM1
Cellular Compromise	formation of cellular inclusion bodies	2.88E-03	3.33E-02	6	ATXN1,DNAJA1,HSPA1A/HSPA1B,SIAH2,SNCAIP,SQSTM1
Cell Cycle	ploidy of tumor cell lines	2.88E-03	3.33E-02	6	BIRC5,CDKN1A,CEBPD,CKAP2,ERBB2,MAD2L1
Cellular Movement	cell movement of brain cancer cell lines	2.97E-03	3.41E-02	12	BCAR1,CD24,CDH2,ECT2,EPHA2,LPAR1,NRP1 (includes EG:18186),PCDH10,PLAUR,PTK2 (includes EG:14083),SYNM,VEGFA
Cellular Growth and Proliferation	growth of brain cancer cell lines	2.97E-03	3.41E-02	12	BCCIP,CDKN1A,CDKN2B,CYR61,ERBB2,FGF2,HSPA5,LEF1,PLAUR,PTK2 (includes EG:14083),SMAD3,SST
Cellular Development	growth of brain cancer cell lines	2.97E-03	3.41E-02	12	BCCIP,CDKN1A,CDKN2B,CYR61,ERBB2,FGF2,HSPA5,LEF1,PLAUR,PTK2 (includes EG:14083),SMAD3,SST
Cellular Movement	cell movement of breast cancer cell lines	2.98E-03	3.42E-02	24	BCAR1,BCAR3,CDH2,CSE1L,DNAJA3,ERBB2,FGF2,IL6,IL8,KISS1,LPAR1,NRG1 (includes EG:112400),NRP1 (includes EG:18186),OSGIN1,PLAUR,PRKD1,PTHLH,PTK2 (includes EG:14083),SDCBP,SIVA1,SNAI1,TFAP2C,UBE2I,VEGFA
Cell Cycle	mitogenesis	3.02E-03	3.45E-02	13	CYR61,ERBB2,FGF2,HBEGF,IGFBP5,IL11,IL6,KITLG,NRG1 (includes EG:112400),PTHLH,TRIM33,VEGFA,VEGFC
Cellular Growth and Proliferation	proliferation of hematopoietic cells	3.03E-03	3.45E-02	10	BCL2L1,BMP4,DKK1,DLL1,GATA2,HOXA5,IL1B,IL6,KITLG,TNFRSF10B
Cellular Development	proliferation of hematopoietic cells	3.03E-03	3.45E-02	10	BCL2L1,BMP4,DKK1,DLL1,GATA2,HOXA5,IL1B,IL6,KITLG,TNFRSF10B
Hematological System Development and Function	proliferation of hematopoietic cells	3.03E-03	3.45E-02	10	BCL2L1,BMP4,DKK1,DLL1,GATA2,HOXA5,IL1B,IL6,KITLG,TNFRSF10B
Hematopoiesis	proliferation of hematopoietic cells	3.03E-03	3.45E-02	10	BCL2L1,BMP4,DKK1,DLL1,GATA2,HOXA5,IL1B,IL6,KITLG,TNFRSF10B
Cancer	rectum cancer	3.03E-03	3.45E-02	10	BIRC5,CD44 (includes EG:100330801),CDK4,GPX3,IL6,PCNA,PDE5A,SOD2,TNFSF9,VEGFA
Gastrointestinal Disease	rectum cancer	3.03E-03	3.45E-02	10	BIRC5,CD44 (includes EG:100330801),CDK4,GPX3,IL6,PCNA,PDE5A,SOD2,TNFSF9,VEGFA
Hematological System Development and Function	hematopoiesis	3.06E-03	3.47E-02	31	AHR,BCL2L1,BMP4,CDK6,CDKN1A,CEBPA,CEBPD,DKK1,DLL1,DYRK3,ETV6,HIST1H4A (includes others),HOXA10,HOXA5,IL11,IL1B,IL6,IL7R,KITLG,LEF1,MAFB,MLLT11,MYB,PNP,PPARG,RACGAP1,RUNX1,SMAD3,TNFRSF10B,TNFRSF11B,TNFSF4
Hematopoiesis	hematopoiesis	3.06E-03	3.47E-02	31	AHR,BCL2L1,BMP4,CDK6,CDKN1A,CEBPA,CEBPD,DKK1,DLL1,DYRK3,ETV6,HIST1H4A (includes others),HOXA10,HOXA5,IL11,IL1B,IL6,IL7R,KITLG,LEF1,MAFB,MLLT11,MYB,PNP,PPARG,RACGAP1,RUNX1,SMAD3,TNFRSF10B,TNFRSF11B,TNFSF4
Cancer	myeloproliferative disorder	3.06E-03	3.47E-02	31	ASXL1,ATP1A1,AURKB,CDKN2B,CEBPA,EPHA2,ERBB2,ETV6,FNTB,GATA2,HLX,IDH1,IL1B,IRAK2,ITGB5,LPP,MKL1,MLF1,MLLT10,MN1,PDGFRA,PLAGL2,POR,RAD51,RRM1,RRM2,RUNX1,RXRA,TOP2A,TYMS,UBE2I
Hematological Disease	myeloproliferative disorder	3.06E-03	3.47E-02	31	ASXL1,ATP1A1,AURKB,CDKN2B,CEBPA,EPHA2,ERBB2,ETV6,FNTB,GATA2,HLX,IDH1,IL1B,IRAK2,ITGB5,LPP,MKL1,MLF1,MLLT10,MN1,PDGFRA,PLAGL2,POR,RAD51,RRM1,RRM2,RUNX1,RXRA,TOP2A,TYMS,UBE2I
Cancer	serous ovarian carcinoma process	3.28E-03	3.70E-02	20	BCL10,BNC1,C13orf15,CALB2,CD24,CFH,CXXC5,DAB2,FLRT2,GPX3,HIST2H2AA3/HIST2H2AA4,HN1,KCNK6,LRP8,MUC1,PDGFRA,RACGAP1,STAT1,TFPI2,TXNIP
Genetic Disorder	serous ovarian carcinoma process	3.28E-03	3.70E-02	20	BCL10,BNC1,C13orf15,CALB2,CD24,CFH,CXXC5,DAB2,FLRT2,GPX3,HIST2H2AA3/HIST2H2AA4,HN1,KCNK6,LRP8,MUC1,PDGFRA,RACGAP1,STAT1,TFPI2,TXNIP
Reproductive System Disease	serous ovarian carcinoma process	3.28E-03	3.70E-02	20	BCL10,BNC1,C13orf15,CALB2,CD24,CFH,CXXC5,DAB2,FLRT2,GPX3,HIST2H2AA3/HIST2H2AA4,HN1,KCNK6,LRP8,MUC1,PDGFRA,RACGAP1,STAT1,TFPI2,TXNIP
Gene Expression	initiation of transcription	3.29E-03	3.71E-02	11	AKAP13,BTG2,CDK9,E2F2,GTF2B,MED16,MED26 (includes EG:306328),MED4 (includes EG:29079),MED7 (includes EG:171285),PDZD8,TAF7
Cellular Development	differentiation of leukocytes	3.43E-03	3.86E-02	25	AHR,BCL2L1,BCL6,BMP4,CCL2,CD14,CDK6,CEBPA,CEBPD,DKK1,DLL1,GATA2,HOXA5,IL1B,IL6,IL8,KITLG,LEF1,MLLT11,MYB,PNP,PPARG,RACGAP1,RUNX1,SFRP1
Hematological System Development and Function	differentiation of leukocytes	3.43E-03	3.86E-02	25	AHR,BCL2L1,BCL6,BMP4,CCL2,CD14,CDK6,CEBPA,CEBPD,DKK1,DLL1,GATA2,HOXA5,IL1B,IL6,IL8,KITLG,LEF1,MLLT11,MYB,PNP,PPARG,RACGAP1,RUNX1,SFRP1
Hematopoiesis	differentiation of leukocytes	3.43E-03	3.86E-02	25	AHR,BCL2L1,BCL6,BMP4,CCL2,CD14,CDK6,CEBPA,CEBPD,DKK1,DLL1,GATA2,HOXA5,IL1B,IL6,IL8,KITLG,LEF1,MLLT11,MYB,PNP,PPARG,RACGAP1,RUNX1,SFRP1
Embryonic Development	angiogenesis of chorioallantoic membrane	3.58E-03	3.93E-02	5	ADAMTS1,ANGPT1,ECM1 (includes EG:100332249),FGF2,VEGFA
Cardiovascular System Development and Function	angiogenesis of chorioallantoic membrane	3.58E-03	3.93E-02	5	ADAMTS1,ANGPT1,ECM1 (includes EG:100332249),FGF2,VEGFA
Organismal Development	angiogenesis of chorioallantoic membrane	3.58E-03	3.93E-02	5	ADAMTS1,ANGPT1,ECM1 (includes EG:100332249),FGF2,VEGFA
Tissue Development	angiogenesis of chorioallantoic membrane	3.58E-03	3.93E-02	5	ADAMTS1,ANGPT1,ECM1 (includes EG:100332249),FGF2,VEGFA
Cell Cycle	arrest in sub-G1 phase	3.58E-03	3.93E-02	5	CDK2,CDKN1A,CDKN2B,SSTR1,TXNIP
Cell Death	cell death of neuroblastoma cells	3.58E-03	3.93E-02	5	ATXN2,BAX,BDNF,PMAIP1,ZNF622
Cell Cycle	delay in mitosis of tumor cell lines	3.58E-03	3.93E-02	5	CDC20,CDK1,DLGAP5,MAD2L1,TOP2A
Cellular Function and Maintenance	endoplasmic reticulum stress response of cells	3.58E-03	3.93E-02	5	ATF4,DDIT3,EIF2AK3,ERN1,HSPA5
Cellular Compromise	endoplasmic reticulum stress response of cells	3.58E-03	3.93E-02	5	ATF4,DDIT3,EIF2AK3,ERN1,HSPA5
Cell Cycle	entry into mitosis of tumor cell lines	3.58E-03	3.93E-02	5	CHEK1,JUB,MAPK7,NRG1 (includes EG:112400),PKMYT1
Cell Cycle	exit from mitosis	3.58E-03	3.93E-02	5	ANLN,BIRC5,CDKN1A,MAD2L1,NDC80
Cell Cycle	interphase of breast cell lines	3.58E-03	3.93E-02	5	CDKN1A,ERBB2,FADD,ID1,LEF1
Cellular Movement	migration of neurons	3.58E-03	3.93E-02	5	BDNF,BMP4,HBEGF,PAFAH1B1,TUBB2B
Nervous System Development and Function	migration of neurons	3.58E-03	3.93E-02	5	BDNF,BMP4,HBEGF,PAFAH1B1,TUBB2B
Cell Cycle	mitosis of breast cancer cell lines	3.58E-03	3.93E-02	5	BMP2,BMP4,CDKN1A,IL6,NRG1 (includes EG:112400)
DNA Replication, Recombination, and Repair	DNA replication	3.60E-03	3.95E-02	21	CCNA2,CDK2,CDKN1A,CDT1,CHEK1,GADD45G,GLI2,KIAA0101,KITLG,MCM2,ORC5 (includes EG:26429),PCNA,PDGFRA,POLE2,POLG (includes EG:100150924),RFC3,RPA2,TFAM,TIMELESS,TMPO,TSPYL2
Cell Cycle	S phase checkpoint control	3.75E-03	4.06E-02	4	CHEK1,FANCD2,MCM7,TP53BP1
DNA Replication, Recombination, and Repair	S phase checkpoint control	3.75E-03	4.06E-02	4	CHEK1,FANCD2,MCM7,TP53BP1
Cellular Function and Maintenance	endoplasmic reticulum stress response of cervical cancer cell lines	3.75E-03	4.06E-02	4	ATF4,DDIT3,EIF2AK3,HSPA5
Cellular Compromise	endoplasmic reticulum stress response of cervical cancer cell lines	3.75E-03	4.06E-02	4	ATF4,DDIT3,EIF2AK3,HSPA5
Cell Morphology	permeabilization of mitochondria	3.75E-03	4.06E-02	4	BAX,BCL2L1,CASP2,ITSN1
Cellular Growth and Proliferation	proliferation of carcinoma cells	3.75E-03	4.06E-02	4	ERBB2,ID1,ID3 (includes EG:15903),PLAUR
Tumor Morphology	proliferation of carcinoma cells	3.75E-03	4.06E-02	4	ERBB2,ID1,ID3 (includes EG:15903),PLAUR
Cancer	tumorigenesis of melanoma cell lines	3.75E-03	4.06E-02	4	FGF2,IL8,TXNIP,VEGFA
Cell Cycle	G2/M phase of tumor cell lines	3.78E-03	4.08E-02	9	CDKN1A,CHEK1,CSE1L,FADD,IGFBP5,IL6,MYB,SULF1,TP53BP1
Cell Cycle	arrest in G2/M phase	3.81E-03	4.10E-02	8	CDKN1A,CHEK1,CSE1L,FADD,IGFBP5,IL6,PPM1A,TP53BP1
Cell Death	cell death of central nervous system cells	3.81E-03	4.10E-02	8	BMP2,ETS2,HSP90AA1,IL8,SNCAIP,SP1,SP3,UNG
Cellular Movement	migration of endothelial cells	3.82E-03	4.10E-02	18	ANGPT1,BMP4,CCL2,CYR61,DCN,DKK1,EFNB2,FGF2,HEY1,IL8,NRP1 (includes EG:18186),PGF,PRKD1,S100P,SERPINF1,STC1,VEGFA,WNT5A
Cardiovascular System Development and Function	migration of endothelial cells	3.82E-03	4.10E-02	18	ANGPT1,BMP4,CCL2,CYR61,DCN,DKK1,EFNB2,FGF2,HEY1,IL8,NRP1 (includes EG:18186),PGF,PRKD1,S100P,SERPINF1,STC1,VEGFA,WNT5A
Cell Cycle	cell cycle progression of prostate cancer cell lines	3.84E-03	4.10E-02	6	CCND1,CDK2,CDK4,ERBB2,NRG1 (includes EG:112400),RRAD
Cellular Development	differentiation of neuroblastoma cell lines	3.84E-03	4.10E-02	6	BDNF,CCND1,CDK4,IGFBP5,NGF,TGM2
Cell Death	cell death of phagocytes	4.48E-03	4.72E-02	12	ANPEP,BCL2L1,CFLAR,IL1B,IL6,IL8,MCL1,NAMPT,NGF,PMAIP1,PPARG,SOD2
Cell Cycle	arrest in G2/M phase of tumor cell lines	4.49E-03	4.72E-02	7	CDKN1A,CHEK1,CSE1L,FADD,IGFBP5,IL6,TP53BP1
Cell Cycle	DNA recombination	4.50E-03	4.72E-02	9	CDK2,EXO1 (includes EG:26909),IL7R,RAD51,RAD51C,RLF,RMI1 (includes EG:306734),SERTAD1,SUPV3L1
DNA Replication, Recombination, and Repair	DNA recombination	4.50E-03	4.72E-02	9	CDK2,EXO1 (includes EG:26909),IL7R,RAD51,RAD51C,RLF,RMI1 (includes EG:306734),SERTAD1,SUPV3L1
Cellular Growth and Proliferation	proliferation of hematopoietic progenitor cells	4.50E-03	4.72E-02	9	BCL2L1,BMP4,DKK1,DLL1,HOXA5,IL1B,IL6,KITLG,TNFRSF10B
Cellular Development	proliferation of hematopoietic progenitor cells	4.50E-03	4.72E-02	9	BCL2L1,BMP4,DKK1,DLL1,HOXA5,IL1B,IL6,KITLG,TNFRSF10B
Hematological System Development and Function	proliferation of hematopoietic progenitor cells	4.50E-03	4.72E-02	9	BCL2L1,BMP4,DKK1,DLL1,HOXA5,IL1B,IL6,KITLG,TNFRSF10B
Hematopoiesis	proliferation of hematopoietic progenitor cells	4.50E-03	4.72E-02	9	BCL2L1,BMP4,DKK1,DLL1,HOXA5,IL1B,IL6,KITLG,TNFRSF10B
Cancer	malignant cutaneous melanoma	4.52E-03	4.72E-02	17	CDK1,CDK2,CDK4,CDK6,CDK7,CDK9,CHEK1,CSE1L,EPHA2,FNTB,HSP90AA1,HSP90AB1,PDGFRA,TUBB2A,TUBE1,TUBG1,VEGFA
Dermatological Diseases and Conditions	malignant cutaneous melanoma	4.52E-03	4.72E-02	17	CDK1,CDK2,CDK4,CDK6,CDK7,CDK9,CHEK1,CSE1L,EPHA2,FNTB,HSP90AA1,HSP90AB1,PDGFRA,TUBB2A,TUBE1,TUBG1,VEGFA
Cell Cycle	G1/S phase transition of colon cancer cell lines	4.56E-03	4.72E-02	3	CDKN1A,KLF4,MT1A
Cell Cycle	arrest in mitosis of colon cancer cell lines	4.56E-03	4.72E-02	3	BIRC5,CDKN1A,MAD2L1
Cell Cycle	delay in initiation of prometaphase	4.56E-03	4.72E-02	3	BIRC5,ECT2,MAD2L1
Cellular Development	differentiation of breast cancer cell lines	4.56E-03	4.72E-02	3	CHKA,ERBB2,NRG1 (includes EG:112400)
Cellular Development	differentiation of cholinergic neurons	4.56E-03	4.72E-02	3	BDNF,FGF2,NGF
Nervous System Development and Function	differentiation of cholinergic neurons	4.56E-03	4.72E-02	3	BDNF,FGF2,NGF
Hematological System Development and Function	flow of blood	4.56E-03	4.72E-02	3	IL1B,NGF,SERPINC1
Organismal Functions	flow of blood	4.56E-03	4.72E-02	3	IL1B,NGF,SERPINC1
Cell Death	fragmentation of genomic DNA	4.56E-03	4.72E-02	3	IL6,PTK2 (includes EG:14083),STAT1
DNA Replication, Recombination, and Repair	fragmentation of genomic DNA	4.56E-03	4.72E-02	3	IL6,PTK2 (includes EG:14083),STAT1
Cell Cycle	mitosis of connective tissue cells	4.56E-03	4.72E-02	3	CDKN1A,FGF2,TAC1
Cellular Compromise	vacuolation of cytoplasm	4.56E-03	4.72E-02	3	BCL2L1,HMOX1,OSBPL1A
Cell Morphology	vacuolation of cytoplasm	4.56E-03	4.72E-02	3	BCL2L1,HMOX1,OSBPL1A
Organismal Survival	organismal death	4.61E-03	4.77E-02	18	ATP1B1,AURKB,BAX,CCND1,CDK4,CLK1,DNAJB1,DNAJB4,ECT2,FGF2,H1F0,IL1B,IL6,IL8,MCM2,SERTAD1,TAF6L,TNFAIP3
Cell Death	apoptosis of leukemia cells	4.64E-03	4.78E-02	8	ANPEP,CASP2,CD24,IL6,LPAR1,MUC1,TNFRSF10B,VEGFC
Cellular Function and Maintenance	cytostasis of breast cancer cell lines	4.64E-03	4.78E-02	8	BHLHE40,CCND1,ERBB2,IL6,PPP1R15A,SMAD3,SMARCA4,TOP2A
Cellular Function and Maintenance	autophagy	4.66E-03	4.79E-02	19	ATF4,BAIAP2,BAX,BIRC2,CFLAR,CHEK1,DAPK3,EEF2K,EIF2AK3,ERN1,FADD,GABBR2,GPR37,IKBKG,MAP1LC3B,MMP10,PRKAA1,PTGER2,SQSTM1
Cell Morphology	autophagy	4.66E-03	4.79E-02	19	ATF4,BAIAP2,BAX,BIRC2,CFLAR,CHEK1,DAPK3,EEF2K,EIF2AK3,ERN1,FADD,GABBR2,GPR37,IKBKG,MAP1LC3B,MMP10,PRKAA1,PTGER2,SQSTM1
Cellular Movement	migration of brain cancer cell lines	4.90E-03	5.01E-02	10	BCAR1,CD24,CDH2,ECT2,EPHA2,LPAR1,PLAUR,PTK2 (includes EG:14083),SYNM,VEGFA
Cellular Movement	migration of carcinoma cell lines	4.90E-03	5.01E-02	10	ANPEP,CYR61,ID1,IL8,KISS1,NRG1 (includes EG:112400),PTK2 (includes EG:14083),TGM2,VEGFC,WNT5A
Cellular Movement	migration of lymphatic system cells	5.01E-03	5.09E-02	6	BCAR1,FGF2,IL6,NRG1 (includes EG:112400),PDGFRA,PGF
Immune Cell Trafficking	migration of lymphatic system cells	5.01E-03	5.09E-02	6	BCAR1,FGF2,IL6,NRG1 (includes EG:112400),PDGFRA,PGF
Cell Cycle	arrest in S phase of tumor cell lines	5.02E-03	5.09E-02	5	CDK1,CHEK1,OSGIN1,REV1 (includes EG:316344),TYMS
Cellular Movement	migration of bone marrow cells	5.02E-03	5.09E-02	5	BCAR1,IL6,NRG1 (includes EG:112400),PDGFRA,PGF
Hematopoiesis	migration of bone marrow cells	5.02E-03	5.09E-02	5	BCAR1,IL6,NRG1 (includes EG:112400),PDGFRA,PGF
Immune Cell Trafficking	migration of bone marrow cells	5.02E-03	5.09E-02	5	BCAR1,IL6,NRG1 (includes EG:112400),PDGFRA,PGF
Inflammatory Response	migration of bone marrow cells	5.02E-03	5.09E-02	5	BCAR1,IL6,NRG1 (includes EG:112400),PDGFRA,PGF
Cell Cycle	prometaphase	5.02E-03	5.09E-02	5	BIRC5,CCDC99,ECT2,KIFC1,MAD2L1
Cellular Movement	cell movement of carcinoma cell lines	5.08E-03	5.14E-02	11	ANPEP,CYR61,DNAJB4,ID1,IL8,KISS1,NRG1 (includes EG:112400),PTK2 (includes EG:14083),TGM2,VEGFC,WNT5A
Cell Death	initiation of cell death	5.10E-03	5.14E-02	19	BAX,BCLAF1,CDKN2C,CRADD,DAPK3,IKBKG,NAIF1,PLAGL1,PMAIP1,PPARG,SIVA1,SMAD3,STK17B,TBK1,TNFRSF10B,TPD52L1,TRADD,UTP11L,ZNF443
Cancer	diffuse B-cell lymphoma	5.10E-03	5.14E-02	12	CDK2,CDK4,CDK6,CDK7,CDK9,CFLAR,EPHA2,FNTB,PIM2,RRM1,TNFAIP3,TOP2A
Hematological Disease	diffuse B-cell lymphoma	5.10E-03	5.14E-02	12	CDK2,CDK4,CDK6,CDK7,CDK9,CFLAR,EPHA2,FNTB,PIM2,RRM1,TNFAIP3,TOP2A
Cellular Function and Maintenance	organization of nucleus	5.33E-03	5.35E-02	9	CDCA8,KIF11,NDC80,PSRC1,RCC1,RLF,SPC25 (includes EG:100144563),SUV39H1,TTK
Cellular Assembly and Organization	organization of nucleus	5.33E-03	5.35E-02	9	CDCA8,KIF11,NDC80,PSRC1,RCC1,RLF,SPC25 (includes EG:100144563),SUV39H1,TTK
Cellular Growth and Proliferation	proliferation of prostate cancer cell lines	5.48E-03	5.49E-02	17	AFAP1,BIRC5,FABP5,FGF2,GADD45G,GDF15,HBEGF,HMOX1,IGFBP5,IL6,IL8,MST4,NGF,NKX3-1,NRIP1,SOCS1,TMEFF2
Cell Death	necrosis of tumor cell lines	5.58E-03	5.56E-02	7	CDKN1A,FADD,MUC1,NRG1 (includes EG:112400),PARP1,STAT1,TNFRSF1A
Cellular Growth and Proliferation	proliferation of embryonic cell lines	5.58E-03	5.56E-02	7	CEBPA,PLAUR,PTP4A1,RARRES3,RXRA,TMEFF2,TSC22D3
Embryonic Development	proliferation of embryonic cell lines	5.58E-03	5.56E-02	7	CEBPA,PLAUR,PTP4A1,RARRES3,RXRA,TMEFF2,TSC22D3
Cell Death	apoptosis of fibroblast cell lines	5.60E-03	5.56E-02	8	BCL2L1,CFLAR,CYR61,EP400,HSPD1,NGF,TNFRSF10B,TNFRSF1A
Cellular Assembly and Organization	formation of mitotic spindle	5.60E-03	5.56E-02	8	BIRC5,CKAP2,HAUS7,KIF11,KIF2C,KIFC1,NEK7,RCC1
DNA Replication, Recombination, and Repair	formation of mitotic spindle	5.60E-03	5.56E-02	8	BIRC5,CKAP2,HAUS7,KIF11,KIF2C,KIFC1,NEK7,RCC1
Cancer	transitional-cell carcinoma	5.60E-03	5.56E-02	8	ERBB2,POLE2,RRM1,RRM2,SFRP1,TUBB2A,TUBE1,TUBG1
Renal and Urological Disease	transitional-cell carcinoma	5.60E-03	5.56E-02	8	ERBB2,POLE2,RRM1,RRM2,SFRP1,TUBB2A,TUBE1,TUBG1
Cell Cycle	contact growth inhibition	5.79E-03	5.58E-02	12	BIRC5,BMP4,CD24,CDKN1A,IL6,MXD1,PPP1R15A,SMAD3,SULF1,TOP2A,TTC5,UBE2I
Cellular Function and Maintenance	contact growth inhibition	5.79E-03	5.58E-02	12	BIRC5,BMP4,CD24,CDKN1A,IL6,MXD1,PPP1R15A,SMAD3,SULF1,TOP2A,TTC5,UBE2I
Cell-To-Cell Signaling and Interaction	contact growth inhibition	5.79E-03	5.58E-02	12	BIRC5,BMP4,CD24,CDKN1A,IL6,MXD1,PPP1R15A,SMAD3,SULF1,TOP2A,TTC5,UBE2I
Cellular Movement	cell movement of endothelial cell lines	5.83E-03	5.58E-02	11	ANGPTL4,BTG2,CYR61,ERBB2,FGF2,IL8,NRG1 (includes EG:112400),PPAP2B,PTK2 (includes EG:14083),VEGFA,VEGFC
Cardiovascular System Development and Function	cell movement of endothelial cell lines	5.83E-03	5.58E-02	11	ANGPTL4,BTG2,CYR61,ERBB2,FGF2,IL8,NRG1 (includes EG:112400),PPAP2B,PTK2 (includes EG:14083),VEGFA,VEGFC
Cell Cycle	contact growth inhibition of colon cancer cell lines	5.85E-03	5.58E-02	4	BIRC5,CD24,MXD1,PPP1R15A
Cellular Function and Maintenance	contact growth inhibition of colon cancer cell lines	5.85E-03	5.58E-02	4	BIRC5,CD24,MXD1,PPP1R15A
Cell-To-Cell Signaling and Interaction	contact growth inhibition of colon cancer cell lines	5.85E-03	5.58E-02	4	BIRC5,CD24,MXD1,PPP1R15A
Cellular Development	differentiation of stromal cells	5.85E-03	5.58E-02	4	BMP2,FGF2,IL11,PDE5A
Connective Tissue Development and Function	differentiation of stromal cells	5.85E-03	5.58E-02	4	BMP2,FGF2,IL11,PDE5A
Ophthalmic Disease	dry eye	5.85E-03	5.58E-02	4	HYAL2,IL1B,IL6,IL8
Cardiovascular Disease	endothelial dysfunction	5.85E-03	5.58E-02	4	GADD45A,HMGCR,IL1B,PDE5A
Cell Cycle	polyploidization of cells	5.85E-03	5.58E-02	4	AURKB,BIRC5,CDKN1A,TOP2A
Lipid Metabolism	synthesis of platelet activating factor	5.85E-03	5.58E-02	4	IL1B,IL8,PGF,VEGFA
Small Molecule Biochemistry	synthesis of platelet activating factor	5.85E-03	5.58E-02	4	IL1B,IL8,PGF,VEGFA
Carbohydrate Metabolism	synthesis of platelet activating factor	5.85E-03	5.58E-02	4	IL1B,IL8,PGF,VEGFA
Cellular Function and Maintenance	autophagy of tumor cell lines	6.04E-03	5.58E-02	14	ATF4,BAIAP2,BAX,CFLAR,CHEK1,EEF2K,EIF2AK3,ERN1,FADD,GABBR2,IKBKG,MAP1LC3B,MMP10,PTGER2
Cell Morphology	autophagy of tumor cell lines	6.04E-03	5.58E-02	14	ATF4,BAIAP2,BAX,CFLAR,CHEK1,EEF2K,EIF2AK3,ERN1,FADD,GABBR2,IKBKG,MAP1LC3B,MMP10,PTGER2
Infectious Disease	infection by virus	6.12E-03	5.58E-02	142	ACSL1,ACTN1,AKAP13,ANPEP,ARNT2,ATP1A1,ATP6V0A1,ATXN2,BCL3,BCLAF1,BTG2,C15orf52,C1R,C1S,C6orf48,CA2,CAV2,CCL2,CD24,CD44 (includes EG:100330801),CD55,CDC42EP3,CEBPD,CEP55,CHORDC1,CHST14,COASY,COG2 (includes EG:22796),COG3 (includes EG:33562),CRYAB,DDX3X,DIMT1,DNAJB1,DOCK10,EFNB2,EIF2C3,ENC1,ERC1,ETF1,ETS2,ETV3,EXOSC10,EXOSC3,FAM86B1 (includes others),FMN2,FXR1,GABBR2,GABRE,GSTO1,H3F3A/H3F3B,HEATR1,…
Gene Expression	initiation of transcription of RNA	6.27E-03	5.58E-02	9	CDK9,E2F2,GTF2B,MED16,MED26 (includes EG:306328),MED4 (includes EG:29079),MED7 (includes EG:171285),PDZD8,TAF7
Cell Death	cell death of cerebral cortex cells	6.43E-03	5.58E-02	6	BMP2,ETS2,SNCAIP,SP1,SP3,UNG
Cellular Function and Maintenance	organization of mitotic spindle	6.43E-03	5.58E-02	6	KIF11,NDC80,PSRC1,RCC1,SPC25 (includes EG:100144563),TTK
Cellular Assembly and Organization	organization of mitotic spindle	6.43E-03	5.58E-02	6	KIF11,NDC80,PSRC1,RCC1,SPC25 (includes EG:100144563),TTK
DNA Replication, Recombination, and Repair	organization of mitotic spindle	6.43E-03	5.58E-02	6	KIF11,NDC80,PSRC1,RCC1,SPC25 (includes EG:100144563),TTK
Cancer	polycythemia vera	6.43E-03	5.58E-02	6	EPHA2,ERBB2,IRAK2,PDGFRA,RRM2,RUNX1
Genetic Disorder	polycythemia vera	6.43E-03	5.58E-02	6	EPHA2,ERBB2,IRAK2,PDGFRA,RRM2,RUNX1
Hematological Disease	polycythemia vera	6.43E-03	5.58E-02	6	EPHA2,ERBB2,IRAK2,PDGFRA,RRM2,RUNX1
Organismal Injury and Abnormalities	polycythemia vera	6.43E-03	5.58E-02	6	EPHA2,ERBB2,IRAK2,PDGFRA,RRM2,RUNX1
Tissue Development	accumulation of breast cancer cell lines	6.44E-03	5.58E-02	2	BIRC5,ERBB2
Drug Metabolism	accumulation of hyaluronic acid	6.44E-03	5.58E-02	2	SP1,UGDH
Small Molecule Biochemistry	accumulation of hyaluronic acid	6.44E-03	5.58E-02	2	SP1,UGDH
Molecular Transport	accumulation of hyaluronic acid	6.44E-03	5.58E-02	2	SP1,UGDH
Carbohydrate Metabolism	accumulation of hyaluronic acid	6.44E-03	5.58E-02	2	SP1,UGDH
Tissue Development	adhesion of glomerular cells	6.44E-03	5.58E-02	2	CCL2,IL8
Cell-To-Cell Signaling and Interaction	adhesion of glomerular cells	6.44E-03	5.58E-02	2	CCL2,IL8
Renal and Urological System Development and Function	adhesion of glomerular cells	6.44E-03	5.58E-02	2	CCL2,IL8
Cellular Compromise	aggregation of cancer cells	6.44E-03	5.58E-02	2	CDH2,SERPINF1
Tissue Development	aggregation of cancer cells	6.44E-03	5.58E-02	2	CDH2,SERPINF1
Tumor Morphology	aggregation of cancer cells	6.44E-03	5.58E-02	2	CDH2,SERPINF1
Cell Death	apoptosis of acute myeloid leukemia blast cells	6.44E-03	5.58E-02	2	ANPEP,MUC1
Cell Death	apoptosis of basal-cell carcinoma	6.44E-03	5.58E-02	2	IL6,MCL1
Cell Death	apoptosis of cultured osteosarcoma cells	6.44E-03	5.58E-02	2	BCL2L1,PARP1
Cell Death	apoptosis of stromal cells	6.44E-03	5.58E-02	2	BMP2,BMP4
Cell Cycle	arrest in G0/G1 phase transition of leukocytes	6.44E-03	5.58E-02	2	CD44 (includes EG:100330801),CHKA
Cell Cycle	arrest in G1 phase of neuroblastoma cell lines	6.44E-03	5.58E-02	2	CCND1,CDK4

## Sheet: B-3
Canonical Pathways in Fibroblasts
Ingenuity Canonical Pathways	Nominal p-Value	Ratio	Genes
Cell Cycle Control of Chromosomal Replication	3.23594e-09	4.67E-01	MCM5,MCM6,CDC45,CDT1,CDK7,CDK6,MCM4,RPA2,MCM3,MCM2,CDK4,ORC5 (includes EG:26429),CDK2,MCM7
Role of BRCA1 in DNA Damage Response	3.98107e-06	2.71E-01	C17orf70,FANCG,RFC5,SMARCA4,CHEK1,FANCE,RAD51,E2F6,FANCD2,RFC4,GADD45A,CDKN1A,RFC2,STAT1,E2F2,RFC3
Hereditary Breast Cancer Signaling	2.04174e-05	1.92E-01	C17orf70,GADD45B,GADD45G,FANCG,TUBG1,CDK6,RFC5,CCND1,SMARCA4,CDK1,CHEK1,FANCE,RAD51,POLR2C,FANCD2,RFC4,GADD45A,CDK4,CDKN1A,XPC,RFC2,UBC,RFC3
Role of CHK Proteins in Cell Cycle Checkpoint Control	3.16228e-05	3.14E-01	E2F6,PCNA,RFC4,CDKN1A,RFC2,RFC5,CDK1,E2F2,CDK2,CHEK1,RFC3
p53 Signaling	3.89045e-05	2.11E-01	PLAGL1,PMAIP1,GADD45B,GADD45G,TNFRSF10B,CSNK1D,APAF1,BAX,CCND1,BIRC5,CHEK1,BCL2L1,PCNA,GADD45A,CDK4,CDKN1A,ADCK3,CCNK,CDK2,DRAM1
Aryl Hydrocarbon Receptor Signaling	5.12861e-05	1.77E-01	IL6,CCND1,SMARCA4,CHEK1,TGM2,CCNA2,HSP90AB1,SP1,PTGES3,AHR,ALDH1B1,NFIC,GSTM3,APAF1,CDK6,BAX,GSTO1,CDK4,CDKN1A,HSP90AA1,IL1B,NRIP1,RXRA,CDK2,MCM7
Mitotic Roles of Polo-Like Kinase	0.000151356	2.33E-01	CDC20,CCNB2,ANAPC10,CDK1,PPP2CB,ANAPC4,PLK4,HSP90AB1,PPP2R3A,PLK2,HSP90AA1,PKMYT1,CDC16,KIF11
Cleavage and Polyadenylation of Pre-mRNA	0.000158489	5E-01	CPSF2,PAPOLA,WDR33,PABPN1,CPSF3,CSTF3
ATM Signaling	0.000177828	2.41E-01	GADD45B,GADD45G,CCNB2,CDK1,CHEK1,RAD51,SMC2,FANCD2,GADD45A,CDKN1A,ATF4,TP53BP1,CDK2
Aldosterone Signaling in Epithelial Cells	0.000281838	1.61E-01	CRYAB,HSPA7,SGK1,DNAJB4,HSPA1A/HSPA1B,HSPB8,HSPA6,DNAJC3,HSPA5,DNAJA1,HSPA4,HSPA1L,HSP90AB1,HSPE1,DNAJB1,PRKD1,HSPA4L,DNAJC9,HSPH1,HSPA9,HSPD1,DNAJB9,HSPA12A,HSPA8,DNAJC14 (includes EG:114481),HSP90AA1
Cyclins and Cell Cycle Regulation	0.000338844	1.84E-01	SUV39H1,CDK7,CDK6,CCNB2,CDKN2C,CCND1,CDKN2B,CDK1,PPP2CB,CCNA2,E2F6,PPP2R3A,CDK4,CDKN1A,E2F2,CDK2
Pancreatic Adenocarcinoma Signaling	0.000645654	1.67E-01	SUV39H1,SMAD3,VEGFC,HBEGF,CCND1,CDKN2B,PGF,BIRC5,VEGFA,RAD51,E2F6,HMOX1,BCL2L1,CDK4,CDKN1A,ERBB2,STAT1,E2F2,CDK2
Glucocorticoid Receptor Signaling	0.000691831	1.29E-01	HSPA7,HSPA1A/HSPA1B,SGK1,SMAD3,HSPA6,GTF2E2,TAF7,IL6,HSPA5,SMARCA4,HSPA4,IKBKG,GTF2B,POLR2C,HSP90AB1,CCL2,PCK2,HSPA1L,PTGES3,CEBPA,PRKAA1,STAT1,IL8,CDK7,HSPA9,CHP,HSPA8,BCL2L1,TAF6L,GTF2H4,CDKN1A,FKBP4,HSP90AA1,IL1B,NRIP1,UBE2I
RAN Signaling	0.00104713	3.33E-01	KPNA3,RCC1,CSE1L,XPO1,RANBP1,RANGAP1
Mismatch Repair in Eukaryotes	0.00104713	3E-01	PCNA,RFC4,RFC2,RFC5,EXO1 (includes EG:26909),RFC3
Protein Ubiquitination Pathway	0.00125893	1.3E-01	CRYAB,HSPA7,CDC20,DNAJB4,HSPA1A/HSPA1B,HSPB8,HSPA6,ANAPC10,DNAJC3,DNAJA1,HSPA5,HSPA4,HSP90AB1,HSPA1L,HSPE1,DNAJB1,HSPA4L,MED20,DNAJC9,HSPH1,USP38,HSPA9,USP30,HSPD1,DNAJB9,HSPA12A,HSPA8,ANAPC4,PSMD12,DNAJC14 (includes EG:114481),HSP90AA1,UBC,BIRC2,UBE2C,UBE2I
Cell Cycle Regulation by BTG Family Proteins	0.00141254	2.5E-01	PPP2CB,E2F6,PPP2R3A,CDK4,BTG2,BTG1,CCND1,E2F2,CDK2
Cell Cycle: G2/M DNA Damage Checkpoint Regulation	0.00147911	2.08E-01	YWHAG,GADD45A,CKS2,CDK7,CDKN1A,TOP2A,CCNB2,PKMYT1,CDK1,CHEK1
Death Receptor Signaling	0.00190546	1.94E-01	TNFRSF21,FADD,TRADD,IKBKG,CRADD,TNFRSF1A,CASP2,TNFRSF10B,APAF1,TBK1,CFLAR,BIRC2
Nicotinate and Nicotinamide Metabolism	0.00194984	1.73E-01	ENPP1,MAP3K6,SGK1,CDK7,CSNK1D,CDK6,QPRT,TTK,CDK1,NT5E,CDK4,PRKAA1,PNP,MAP3K8,NAMPT,MAPK7,CDK2
NRF2-mediated Oxidative Stress Response	0.0020893	1.38E-01	DNAJB4,MAF,HSPB8,DNAJA4,DNAJC3,DNAJA1,HMOX1,SOD2,KEAP1,ATF4,DNAJA3,DNAJB1,ACTC1,PRKD1,DNAJC9,GSTM3,HERPUD1,DNAJB9,MAFF,GSTO1,STIP1,DNAJC14 (includes EG:114481),SQSTM1,MAPK7,ENC1,EIF2AK3
Interferon Signaling	0.0030903	2.35E-01	IFIT3,SOCS1,IFIT1,IFNGR2,STAT2,IRF9,BAX,STAT1
Cell Cycle: G1/S Checkpoint Regulation	0.00331131	1.86E-01	E2F6,CDK4,SMAD3,SUV39H1,CDKN1A,NRG1 (includes EG:112400),CDK6,CCND1,CDKN2B,E2F2,CDK2
VDR/RXR Activation	0.00338844	1.77E-01	IL12A,CCNC,IGFBP5,KLF4,GTF2B,SP1,GADD45A,MXD1,HOXA10,CDKN1A,CEBPA,CD14,RXRA,PRKD1
Pyrimidine Metabolism	0.00512861	1.45E-01	TYMS,ENPP1,POLE2,DCTPP1,UPP1,POLG (includes EG:100150924),RRM2,DTYMK,RFC5,POLRMT,PUS1,RRM1,POLR3H,POLR2C,PRIM1,REV1 (includes EG:316344),NT5E,PNP,POLA2,UNG
Small Cell Lung Cancer Signaling	0.0104713	1.43E-01	PTK2 (includes EG:14083),BCL2L1,IKBKG,CDK4,SUV39H1,APAF1,CDK6,RXRA,CCND1,CDKN2B,CDK2,BIRC2
TNFR1 Signaling	0.0114815	1.76E-01	FADD,TRADD,IKBKG,CRADD,TNFRSF1A,CASP2,APAF1,TNFAIP3,BIRC2
Endoplasmic Reticulum Stress Pathway	0.011749	2.78E-01	ERN1,DNAJC3,ATF4,HSPA5,EIF2AK3
Induction of Apoptosis by HIV1	0.0162181	1.59E-01	FADD,BCL2L1,TRADD,IKBKG,TNFRSF1A,APAF1,SLC25A3,BAX,TNFRSF11B,BIRC2
Retinoic acid Mediated Apoptosis Signaling	0.0162181	1.64E-01	FADD,TNFRSF10B,APAF1,PARP8,PARP4,TNFRSF10D,CFLAR,RXRA,PARP9,PARP1
Huntington's Disease Signaling	0.0190546	1.14E-01	HSPA7,SGK1,BDNF,HSPA1A/HSPA1B,HSPA6,HSPA5,NGF,CDK5R1,TGM2,HSPA4,POLR2C,HSPA1L,SP1,ATF4,DNAJB1,RASA1,PRKD1,SDHA (includes EG:157074),HSPA9,APAF1,BAX,ZDHHC17,HSPA8,BCL2L1,CASP2,UBC
Polyamine Regulation in Colon Cancer	0.0229087	2.08E-01	PPARG,AZIN1,MXD1,SAT1,SAT2
Wnt/β-catenin Signaling	0.0234423	1.24E-01	AXIN2,APPL2,CSNK1D,FZD9,CCND1,CSNK2A2,PPP2CB,SOX9,CDH2,FZD4,PPP2R3A,TLE4,CD44 (includes EG:100330801),SOX8,LEF1,SFRP1,DKK1,UBC,FZD2,WNT5B,WNT5A
Estrogen Receptor Signaling	0.0234423	1.27E-01	CCNC,MED20,CDK7,H3F3A/H3F3B,HNRNPD,TAF7,MED6 (includes EG:10001),SMARCA4,TAF6L,GTF2B,POLR2C,PCK2,GTF2H4,MED16,NRIP1,TRRAP,MED4 (includes EG:29079)
Hepatic Fibrosis / Hepatic Stellate Cell Activation	0.025704	1.29E-01	IL8,TNFRSF1A,FGF2,SMAD3,IFNGR2,BAMBI,VEGFC,IGFBP5,IL6,BAX,PGF,VEGFA,CCL2,PDGFRA,CD14,IL1B,STAT1,TNFRSF11B
Type I Diabetes Mellitus Signaling	0.0331131	1.23E-01	SOCS1,IL12A,TNFRSF1A,SOCS2,APAF1,IFNGR2,HSPD1,FADD,TRADD,IKBKG,IL1B,STAT1,SOCS5,TNFRSF11B
Granzyme B Signaling	0.0346737	2.5E-01	APAF1,LMNB2,LMNB1,PARP1
Mechanisms of Viral Exit from Host Cells	0.0380189	1.75E-01	CHMP6,XPO1,LMNB2,VPS25 (includes EG:28084),ACTC1,LMNB1,PRKD1
Role of IL-17F in Allergic Inflammatory Airway Diseases	0.0380189	1.67E-01	IL8,CCL2,ATF4,SIK1,IL1B,IL6,IL11
Molecular Mechanisms of Cancer	0.0416869	1E-01	BMP4,SMAD3,BMP2,SUV39H1,CDKN2C,SMAD5,CCND1,CDKN2B,CHEK1,PTK2 (includes EG:14083),E2F6,RHOG,FANCD2,ARHGEF2,ARHGEF3,RASA1,FZD2,E2F2,PRKD1,PMAIP1,SMAD6,APAF1,CDK6,ARHGEF17,FZD9,BAX,FADD,BCL2L1,FZD4,CDK4,CDKN1A,LEF1,CFLAR,CDK2,BIRC2,WNT5A
Human Embryonic Stem Cell Pluripotency	0.042658	1.1E-01	BMP4,BDNF,FGF2,SMAD3,BMP2,SMAD6,FZD9,SMAD5,NGF,S1PR3,FZD4,PDGFRA,LEF1,FZD2,WNT5B,WNT5A
Bladder Cancer Signaling	0.0446684	1.33E-01	VEGFA,IL8,FGF2,CDK4,SUV39H1,CDKN1A,MMP10,VEGFC,ERBB2,MMP12,CCND1,PGF
Activation of IRF by Cytosolic Pattern Recognition Receptors	0.0489779	1.43E-01	FADD,IKBKG,STAT2,IRF9,TBK1,IL6,STAT1,ADAR,IFIT2
Differential Regulation of Cytokine Production in Macrophages and T Helper Cells by IL-17A and IL-17F	0.0512861	2.22E-01	IL12A,CCL2,IL1B,IL6
Nucleotide Excision Repair Pathway	0.0512861	1.71E-01	POLR2C,GTF2H4,CDK7,XPC,RAD23B,RPA2
EIF2 Signaling	0.0512861	1.09E-01	RPL34,RPL17,PPP1R15A,RPL14,RPL9,RPL37,RPS7,RPS29,RPL36A/hCG 1787519,RPL28,EIF4A3,UBA52,EIF5,EIF2C3,RPL32,RPL29 (includes EG:367874),RPS4Y2,EIF2AK3,RPL13A,RPL41
Purine Metabolism	0.0630957	1.06E-01	KIF1B,HSPA5,POLRMT,SMARCA4,POLR2C,PRIM1,ADK,ACTC1,ATP1B1,ENPP1,POLE2,DCTPP1,RRM2,POLG (includes EG:100150924),HSPD1,RFC5,ATIC,PDE1C,RRM1,POLR3H,REV1 (includes EG:316344),NT5E,KIF20B,PNP,POLA2,HSP90AA1,PDE5A,PFAS
Citrate Cycle	0.0691831	1.79E-01	SDHA (includes EG:157074),PCK2,DLD,FH,IDH1
Germ Cell-Sertoli Cell Junction Signaling	0.0724436	1.13E-01	MAP3K6,TNFRSF1A,TUBG1,TUBB2A,TUBB,BCAR1,TUBB2B,PTK2 (includes EG:14083),CDH2,AGGF1,RHOG,TUBB6,KEAP1,PPAP2B,MAP3K8,CLINT1,ACTC1,ACTN1
RAR Activation	0.0812831	1.09E-01	RDH14,RDH10,CDK7,BMP2,CSK,SMAD3,NR2F2,SMAD6,SMAD5,SMARCA4,PARP1,VEGFA,CSNK2A2,GTF2H4,NRIP1,NR2F6,RXRA,PRKD1,CITED2
Thyroid Cancer Signaling	0.0891251	1.36E-01	PPARG,BDNF,LEF1,NGF,RXRA,CCND1
Ovarian Cancer Signaling	0.0933254	1.09E-01	SUV39H1,PTGS1,VEGFC,FZD9,CCND1,PGF,VEGFA,RAD51,FZD4,CDK4,CD44 (includes EG:100330801),LEF1,FZD2,WNT5B,WNT5A
Assembly of RNA Polymerase II Complex	0.0954993	1.27E-01	TAF6L,GTF2B,POLR2C,GTF2H4,CDK7,GTF2E2,TAF7
Role of PKR in Interferon Induction and Antiviral Response	0.0977237	1.36E-01	FADD,IKBKG,TNFRSF1A,APAF1,STAT1,RNASEL
Nucleotide Sugars Metabolism	0.103039	2.5E-01	UGDH,GALE
Basal Cell Carcinoma Signaling	0.106414	1.25E-01	BMP4,GLI2,FZD4,BMP2,FZD9,LEF1,FZD2,WNT5B,WNT5A
Arginine and Proline Metabolism	0.106414	1.29E-01	ALDH1B1,ASS1,LCMT2,SAT1,SAT2,GOT1,SMOX,PYCR2,AMD1
Complement System	0.109396	1.52E-01	C1R,CD55,CD59 (includes EG:25407),C1S,CFH
ILK Signaling	0.109396	1.04E-01	MUC1,TNFRSF1A,BMP2,SNAI1,VEGFC,PPP1R14B,CCND1,PGF,VEGFA,PTK2 (includes EG:14083),PPP2CB,RHOG,PPP2R3A,PPAP2B,ATF4,LEF1,ACTC1,ITGB5,ACTN1
PPAR Signaling	0.111686	1.09E-01	PPARG,IKBKG,HSP90AB1,TNFRSF1A,PDGFRA,HSP90AA1,IL1B,NRIP1,RXRA,CITED2,TNFRSF11B
Phenylalanine, Tyrosine and Tryptophan Biosynthesis	0.113763	2E-01	GOT1,PCBD1,FARSA
TWEAK Signaling	0.120781	1.35E-01	FADD,TRADD,IKBKG,APAF1,BIRC2
Role of JAK1, JAK2 and TYK2 in Interferon Signaling	0.121619	1.54E-01	SOCS1,IFNGR2,STAT2,STAT1
Glioma Signaling	0.131826	1.04E-01	E2F6,CDK4,SUV39H1,CDKN1A,PDGFRA,CDK6,CDKN2C,CCND1,CDKN2B,PRKD1,E2F2
Glycosaminoglycan Degradation	0.136144	1.6E-01	HYAL2,SULF1,SGSH,COASY
Neuregulin Signaling	0.142561	1.05E-01	HSP90AB1,DCN,NRG1 (includes EG:112400),HSP90AA1,HBEGF,ERRFI1,ERBB2,CDK5R1,PRKD1,TMEFF2
TR/RXR Activation	0.142561	1.12E-01	KLF9,SLC16A3,RAB3B,AKR1C1/AKR1C2,SLC2A1,SREBF1,RCAN2,BCL3,RXRA,DIO2
IL-17A Signaling in Fibroblasts	0.145546	1.28E-01	IKBKG,CCL2,CEBPD,IL6,NFKBIZ
Role of Osteoblasts, Osteoclasts and Chondrocytes in Rheumatoid Arthritis	0.147231	9.69E-02	CTSK,BMP4,TNFRSF1A,BMP2,CHP,SMAD6,FZD9,IL6,SMAD5,TRADD,IKBKG,FZD4,IL1B,LEF1,DKK1,SFRP1,FZD2,WNT5B,BIRC2,TNFRSF11B,WNT5A,IL11
Role of Oct4 in Mammalian Embryonic Stem Cell Pluripotency	0.148936	1.33E-01	FOXA1,NR2F2,JARID2,NR2F6,ASH2L,PARP1
Methionine Metabolism	0.151356	1.54E-01	TGM2,CTH,AMD1,DNMT1
Factors Promoting Cardiogenesis in Vertebrates	0.158489	1.1E-01	BMP4,FZD4,BMP2,FZD9,LEF1,DKK1,SMAD5,FZD2,PRKD1,CDK2
Apoptosis Signaling	0.158489	1.09E-01	BCL2L1,IKBKG,TNFRSF1A,CASP2,APAF1,BAX,CDK1,MCL1,PARP1,BIRC2
Alanine and Aspartate Metabolism	0.158489	1.35E-01	ASS1,DLD,GOT1,AARS,PDHB
Role of Macrophages, Fibroblasts and Endothelial Cells in Rheumatoid Arthritis	0.158855	8.95E-02	SOCS1,FGF2,IL6,CCND1,PGF,VEGFA,TRADD,IKBKG,CCL2,CEBPA,ATF4,FZD2,WNT5B,PRKD1,TNFRSF11B,IL8,TNFRSF1A,CHP,VEGFC,FZD9,FZD4,CEBPD,IL1B,LEF1,DKK1,SFRP1,IRAK2,WNT5A
Butanoate Metabolism	0.159588	1.23E-01	SDHA (includes EG:157074),ALDH1B1,DBT,HMGCL,HMGCS1,PDHB,PRDX6
Cardiomyocyte Differentiation via BMP Receptors	0.171396	1.58E-01	BMP4,BMP2,SMAD6
Prostate Cancer Signaling	0.181134	1E-01	HSP90AB1,SUV39H1,CDKN1A,NKX3-1,HSP90AA1,ATF4,LEF1,CCND1,CDK2
TNFR2 Signaling	0.183231	1.25E-01	IKBKG,TNFAIP3,TBK1,BIRC2
Docosahexaenoic Acid (DHA) Signaling	0.18578	1.25E-01	BCL2L1,APAF1,SERPINF1,IL1B,BAX
Type II Diabetes Mellitus Signaling	0.187068	9.52E-02	PPARG,SOCS1,TRADD,ACSL3,IKBKG,TNFRSF1A,SOCS2,PRKAA1,SOCS5,ACSL1,PRKD1,TNFRSF11B
Valine, Leucine and Isoleucine Biosynthesis	0.188799	2E-01	VARS,PDHB
Glycine, Serine and Threonine Metabolism	0.197242	1.13E-01	CHKA,DLD,DBT,ALAS1,SHMT1,GOT1,SMOX,CTH
Inositol Phosphate Metabolism	0.200909	1E-01	MAP3K6,SGK1,CDK7,CSNK1D,CDK6,TTK,CDK1,CDK4,PRKAA1,IMPA2,MAP3K8,PI4K2B,MAPK7,PMPCA,CDK2
Chronic Myeloid Leukemia Signaling	0.202302	9.8E-02	BCL2L1,E2F6,IKBKG,CDK4,SMAD3,SUV39H1,CDKN1A,CDK6,CCND1,E2F2
PI3K/AKT Signaling	0.203236	9.3E-02	PPP2CB,BCL2L1,IKBKG,YWHAG,HSP90AB1,PPP2R3A,GDF15,CDKN1A,HSP90AA1,MAP3K8,CCND1,MCL1
Glioblastoma Multiforme Signaling	0.20797	9.32E-02	CDK6,FZD9,CCND1,E2F6,FZD4,RHOG,CDK4,CDKN1A,PDGFRA,LEF1,FZD2,CDK2,WNT5B,E2F2,WNT5A
p38 MAPK Signaling	0.211836	1.04E-01	FADD,TRADD,DDIT3,TNFRSF1A,DUSP10,H3F3A/H3F3B,ATF4,IL1B,EEF2K,STAT1,IRAK2
DNA Methylation and Transcriptional Repression Signaling	0.213304	1.3E-01	SAP130,DNMT1,SAP18
Pantothenate and CoA Biosynthesis	0.213304	1.5E-01	ENPP1,PPCS,COASY
One Carbon Pool by Folate	0.213304	1.5E-01	TYMS,SHMT1,ATIC
JAK/Stat Signaling	0.215774	1.09E-01	SOCS1,PIAS4,CDKN1A,SOCS2,STAT2,STAT1,SOCS5
Synthesis and Degradation of Ketone Bodies	0.21928	1.82E-01	HMGCL,HMGCS1
IL-6 Signaling	0.2208	1.02E-01	IL8,SOCS1,CSNK2A2,IKBKG,TNFRSF1A,CD14,IL1B,IL6,TNFAIP6,TNFRSF11B
CD27 Signaling in Lymphocytes	0.222844	1.09E-01	BCL2L1,SIVA1,IKBKG,MAP3K6,APAF1,MAP3K8
T Helper Cell Differentiation	0.22751	1.01E-01	IL12A,TNFRSF1A,IFNGR2,IL6,STAT1,BCL6,TNFRSF11B
Hypoxia Signaling in the Cardiovascular System	0.22751	1.06E-01	VEGFA,HSP90AB1,CSNK1D,HSP90AA1,ATF4,UBE2C,UBE2I
Role of Hypercytokinemia/hyperchemokinemia in the Pathogenesis of Influenza	0.229615	1.22E-01	IL8,IL12A,CCL2,IL1B,IL6
Sertoli Cell-Sertoli Cell Junction Signaling	0.232809	9.19E-02	CLDN11,CLDN15,MAP3K6,TNFRSF1A,TUBG1,TUBB2A,TUBB,BCAR1,TUBB2B,AGGF1,TUBB6,PPAP2B,KEAP1,MAP3K8,CLINT1,ACTC1,ACTN1
Circadian Rhythm Signaling	0.234963	1.21E-01	BHLHE40,CSNK1D,ATF4,CRY1
Biosynthesis of Steroids	0.234963	1.43E-01	IDI1,HMGCR,FNTB
Glutathione Metabolism	0.236592	1.13E-01	GPX3,GSTM3,ANPEP,GSTO1,PRDX6,IDH1
Xenobiotic Metabolism Signaling	0.241546	9.13E-02	ALDH1B1,MAP3K6,GSTM3,MAF,IL6,GSTO1,PPP2CB,HMOX1,HSP90AB1,PPP2R3A,KEAP1,PTGES3,HSP90AA1,IL1B,MAP3K8,SMOX,NDST2,MAPK7,NRIP1,RXRA,EIF2AK3,AHR,PRKD1,CITED2
Colorectal Cancer Metastasis Signaling	0.242661	9.02E-02	TNFRSF1A,SMAD3,VEGFC,MMP10,FZD9,IL6,BAX,CCND1,PGF,BIRC5,VEGFA,BCL2L1,RHOG,FZD4,LEF1,PTGER2,MMP12,STAT1,FZD2,WNT5B,PTGER4,WNT5A
Role of JAK2 in Hormone-like Cytokine Signaling	0.25293	1.14E-01	SOCS1,SOCS2,STAT1,SOCS5
Androgen Signaling	0.257632	8.46E-02	HSPA4,GTF2B,POLR2C,GTF2H4,SMAD3,CDK7,HSP90AA1,GTF2E2,DNAJB1,CCND1,PRKD1
CDK5 Signaling	0.262422	1.01E-01	FOSB,PPP2CB,LAMA5,PPP1R10,BDNF,PPP2R3A,NGF,PPP1R14B,CDK5R1
Non-Small Cell Lung Cancer Signaling	0.26485	9.59E-02	STK4,CDK4,SUV39H1,CDK6,ERBB2,RXRA,CCND1
Differential Regulation of Cytokine Production in Intestinal Epithelial Cells by IL-17A and IL-17F	0.279898	1.3E-01	IL12A,CCL2,IL1B
Assembly of RNA Polymerase III Complex	0.280543	1.43E-01	GTF3C2,BRF2
LPS/IL-1 Mediated Inhibition of RXR Function	0.287078	8.78E-02	ALDH1B1,ACSL3,TNFRSF1A,GSTM3,GSTO1,FABP5,SREBF1,CPT2,IL1B,XPO1,CD14,ALAS1,SMOX,NDST2,RXRA,HMGCS1,ACSL1,TNFRSF11B
Breast Cancer Regulation by Stathmin1	0.287078	9E-02	TUBG1,TUBB2A,ARHGEF17,TUBB,PPP1R14B,CDK1,TUBB2B,PPP2CB,E2F6,PPP1R10,TUBB6,PPP2R3A,CDKN1A,ARHGEF2,ARHGEF3,PRKD1,E2F2,CDK2
Nitrogen Metabolism	0.289734	1.14E-01	TGM2,CA2,CTH,ADAR
Tumoricidal Function of Hepatic Natural Killer Cells	0.301995	1.25E-01	FADD,APAF1,BAX
Role of JAK family kinases in IL-6-type Cytokine Signaling	0.325087	1.15E-01	SOCS1,IL6,STAT1
Tight Junction Signaling	0.326588	8.92E-02	CPSF2,CLDN11,CLDN15,TNFRSF1A,PPP2CB,PPP2R3A,CDK4,CEBPA,CPSF3,ARHGEF2,STX4,ACTC1,CSTF3,TNFRSF11B
Phenylalanine Metabolism	0.326588	1.11E-01	DBT,GOT1,SMOX,PRDX6
LXR/RXR Activation	0.327341	9.09E-02	CCL2,SREBF1,TNFRSF1A,SERPINF1,CD14,IL1B,IL6,HMGCR,RXRA,TNFRSF11B,APOD
Methane Metabolism	0.341979	1.33E-01	SHMT1,PRDX6
Primary Immunodeficiency Signaling	0.345144	7.27E-02	IL7R,RFXANK,IKBKG,UNG
Notch Signaling	0.345144	9.76E-02	DLL1,HEY2,JAG1,HEY1
Antiproliferative Role of TOB in T Cell Signaling	0.347536	1.15E-01	CCNA2,SMAD3,CDK2
TGF-β Signaling	0.348337	8.99E-02	BMP4,PIAS4,SMAD3,BMP2,SMAD6,SMAD5,PITX2,INHBB
ERK5 Signaling	0.349945	9.68E-02	YWHAG,SGK1,ATF4,MAP3K8,MAPK7,NGF
Pyruvate Metabolism	0.349945	1E-01	ALDH1B1,ACSL3,PCK2,DLD,PDHB,ACSL1
Valine, Leucine and Isoleucine Degradation	0.349945	1E-01	ALDH1B1,PCCA,DBT,PCCB,HMGCL,HMGCS1
Telomerase Signaling	0.363915	9.09E-02	PPP2CB,SP1,HSP90AB1,PPP2R3A,CDKN1A,TERF2IP,PTGES3,HSP90AA1,ETS2
IGF-1 Signaling	0.363915	8.82E-02	PTK2 (includes EG:14083),SOCS1,CSNK2A2,YWHAG,SOCS2,IGFBP5,CYR61,SOCS5,RASA1
RhoA Signaling	0.366438	9.17E-02	PTK2 (includes EG:14083),RHPN2,LPAR1,RTKN,BAIAP2,CDC42EP3,ANLN,CDC42EP2,ACTC1,ARHGAP1
Role of Wnt/GSK-3β Signaling in the Pathogenesis of Influenza	0.369828	9.09E-02	FZD4,CSNK1D,FZD9,LEF1,FZD2,WNT5B,WNT5A
IL-15 Production	0.369828	1.03E-01	PTK2 (includes EG:14083),IL6,STAT1
Parkinson's Signaling	0.371535	1.11E-01	GPR37,SNCAIP
Ascorbate and Aldarate Metabolism	0.371535	1.18E-01	ALDH1B1,GSTO1
NF-κB Signaling	0.381066	8.24E-02	BMP4,TNFRSF1A,RELB,BMP2,TNFAIP3,TBK1,NGF,CSNK2A2,IKBKG,BCL10,PDGFRA,IL1B,MAP3K8,TNFRSF11B
IL-8 Signaling	0.389942	8.43E-02	IL8,ANGPT1,VEGFC,HBEGF,BAX,CCND1,PGF,VEGFA,PTK2 (includes EG:14083),HMOX1,BCL2L1,IKBKG,RHOG,PRKD1,IRAK2
TREM1 Signaling	0.389942	9.43E-02	IL8,CCL2,IL1B,CD83,IL6
HER-2 Signaling in Breast Cancer	0.396278	8.86E-02	CDKN1A,NRG1 (includes EG:112400),CDK6,ERBB2,CCND1,ITGB5,PRKD1
HGF Signaling	0.399025	8.82E-02	PTK2 (includes EG:14083),MAP3K6,CDKN1A,ETS2,MAP3K8,IL6,CCND1,PRKD1,CDK2
Granzyme A Signaling	0.400867	1.18E-01	H1F0,H1FX
N-Glycan Biosynthesis	0.401791	1E-01	FUT8,B4GALT7,DOLPP1,DOLK
Dopamine Receptor Signaling	0.410204	9.09E-02	PPP2CB,GCH1,PPP1R10,PPP2R3A,SMOX,PPP1R14B,PCBD1
HIF1α Signaling	0.422669	8.74E-02	VEGFA,SLC2A1,MMP10,HSP90AA1,VEGFC,MAPK7,MMP12,SLC2A3,PGF
C21-Steroid Hormone Metabolism	0.429536	1.11E-01	AKR1C1/AKR1C2,AKR1C4
Lymphotoxin β Receptor Signaling	0.438531	8.93E-02	BCL2L1,IKBKG,RELB,APAF1,BIRC2
Production of Nitric Oxide and Reactive Oxygen Species in Macrophages	0.451856	8.11E-02	MAP3K6,TNFRSF1A,IFNGR2,PPP1R14B,PPP2CB,IKBKG,RHOG,PPP1R10,PPP2R3A,HOXA10,MAP3K8,STAT1,PRKD1,APOD,TNFRSF11B
Acute Phase Response Signaling	0.454988	8.14E-02	SOCS1,TNFRSF1A,C1S,SOCS2,SERPINF1,IL6,C1R,HMOX1,TRADD,IKBKG,SOD2,IL1B,SOCS5,TNFRSF11B
Urea Cycle and Metabolism of Amino Groups	0.458142	9.68E-02	ASS1,LCMT2,PYCR2
Axonal Guidance Signaling	0.462381	7.58E-02	GLI2,BMP4,ITSN1,BDNF,BMP2,TUBB,NGF,BCAR1,TUBB2B,PGF,VEGFA,PTK2 (includes EG:14083),EFNB2,EFNB1,BAIAP2,ERBB2,RASA1,FZD2,WNT5B,PRKD1,TUBG1,CHP,TUBB2A,MMP10,VEGFC,FZD9,SDCBP,FZD4,TUBB6,EPHA2,NRP1 (includes EG:18186),WNT5A
Glycolysis/Gluconeogenesis	0.463447	8.75E-02	ALDH1B1,ACSL3,RDH14,DLD,PDHB,ACSL1,BPGM
14-3-3-mediated Signaling	0.465586	8.4E-02	YWHAG,TUBB6,TNFRSF1A,TUBB2A,TUBG1,YAP1 (includes EG:10413),BAX,TUBB,PRKD1,TUBB2B
IL-10 Signaling	0.466659	8.33E-02	HMOX1,IKBKG,SP1,CD14,IL1B,IL6
Growth Hormone Signaling	0.466659	8.45E-02	SOCS1,SOCS2,CEBPA,STAT1,SOCS5,PRKD1
Role of Tissue Factor in Cancer	0.468813	8.33E-02	VEGFA,IL8,BCL2L1,PLAUR,VEGFC,HBEGF,IL1B,CYR61,ITGB5
Glioma Invasiveness Signaling	0.470977	8.47E-02	PTK2 (includes EG:14083),RHOG,CD44 (includes EG:100330801),PLAUR,ITGB5
Propanoate Metabolism	0.470977	8.93E-02	ALDH1B1,ACSL3,PCCA,PCCB,ACSL1
Airway Pathology in Chronic Obstructive Pulmonary Disease	0.487528	1.25E-01	IL8
Serotonin Receptor Signaling	0.500035	9.09E-02	GCH1,SMOX,PCBD1
Aminoacyl-tRNA Biosynthesis	0.500035	9.09E-02	AARS,VARS,FARSA
Lysine Degradation	0.502343	8.47E-02	ALDH1B1,SUV39H1,DBT,SHMT1,GCDH
Amyotrophic Lateral Sclerosis Signaling	0.509331	8E-02	VEGFA,BCL2L1,NEFM,APAF1,VEGFC,BAX,PGF,BIRC2
Nur77 Signaling in T Lymphocytes	0.510505	7.02E-02	CHP,APAF1,MAPK7,RXRA
FXR/RXR Activation	0.516416	8.33E-02	PPARG,PCK2,SREBF1,FOXA1,IL1B,RXRA,FOXA3
VEGF Signaling	0.516416	7.69E-02	VEGFA,PTK2 (includes EG:14083),BCL2L1,VEGFC,ACTC1,ACTN1,PGF
IL-9 Signaling	0.521195	7.89E-02	SOCS2,BCL3,STAT1
Assembly of RNA Polymerase I Complex	0.529663	8.33E-02	TAF1B
Hepatic Cholestasis	0.534564	7.75E-02	IL8,IKBKG,SREBF1,TNFRSF1A,CD14,IL1B,IL6,RXRA,PRKD1,TNFRSF11B,IRAK2
Prolactin Signaling	0.537032	7.79E-02	SOCS1,SP1,SOCS2,STAT1,SOCS5,PRKD1
Bile Acid Biosynthesis	0.544503	8.16E-02	ALDH1B1,AKR1C1/AKR1C2,RDH14,AKR1C4
Nitric Oxide Signaling in the Cardiovascular System	0.550808	7.41E-02	VEGFA,HSP90AB1,HSP90AA1,VEGFC,SLC7A1,PGF
Glutamate Metabolism	0.559758	8.11E-02	GOT1,GSTO1,GFPT2
Histidine Metabolism	0.561048	8.16E-02	ALDH1B1,PRMT6,DBT,SMOX
Fatty Acid Biosynthesis	0.566239	1E-01	ACSL3
Aminophosphonate Metabolism	0.58479	8.33E-02	TGM2,PRMT6
Lysine Biosynthesis	0.601174	9.09E-02	TGM2
